# Supplementary material for: Diagnostic features, management and prognosis of type 2 myocardial infarction compared to type 1 myocardial infarction: a systematic review and meta-analysis
Source: PubMed Central journal article supplement — BMJ Open. 2022 Feb 17;12(2):e055755. doi: 10.1136/bmjopen-2021-055755 (PMC8860077; doi:10.1136/bmjopen-2021-055755), 2022-02-17
Supplement: bmjopen-2021-055755.draft_revisions.pdf [file bmjopen-2021-055755.draft_revisions.pdf]

# BMJ Open

BMJ Open is committed to open peer review. As part of this commitment we make the peer review history of every article we publish publicly available.

When an article is published we post the peer reviewers' comments and the authors' responses online. We also post the versions of the paper that were used during peer review. These are the versions that the peer review comments apply to.

The versions of the paper that follow are the versions that were submitted during the peer review process. They are not the versions of record or the final published versions. They should not be cited or distributed as the published version of this manuscript.

BMJ Open is an open access journal and the full, final, typeset and author-corrected version of record of the manuscript is available on our site with no access controls, subscription charges or pay-per-view fees (<http://bmjopen.bmj.com>).

If you have any questions on BMJ Open's open peer review process please email [info.bmjopen@bmj.com](mailto:info.bmjopen@bmj.com)

# BMJ Open

## Diagnostic features, management, and prognosis of Type 2 myocardial infarction: A systematic review and meta-analysis.

|                               |                                                                                                                                                                                                                                                                                                                              |
|-------------------------------|------------------------------------------------------------------------------------------------------------------------------------------------------------------------------------------------------------------------------------------------------------------------------------------------------------------------------|
| Journal:                      | <i>BMJ Open</i>                                                                                                                                                                                                                                                                                                              |
| Manuscript ID                 | bmjopen-2021-055755                                                                                                                                                                                                                                                                                                          |
| Article Type:                 | Original research                                                                                                                                                                                                                                                                                                            |
| Date Submitted by the Author: | 23-Jul-2021                                                                                                                                                                                                                                                                                                                  |
| Complete List of Authors:     | White, Kyle; Princess Alexandra Hospital; University of Queensland Kinarivala, Mansey; Princess Alexandra Hospital, Internal Medicine and Clinical Epidemiology<br>Scott, Ian; University of Queensland, School of Clinical Medicine; Princess Alexandra Hospital, Department of Internal Medicine and Clinical Epidemiology |
| Keywords:                     | Coronary heart disease < CARDIOLOGY, Ischaemic heart disease < CARDIOLOGY, Myocardial infarction < CARDIOLOGY                                                                                                                                                                                                                |
|                               |                                                                                                                                                                                                                                                                                                                              |

SCHOLARONE™  
Manuscripts

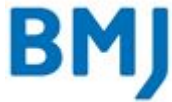

I, the Submitting Author has the right to grant and does grant on behalf of all authors of the Work (as defined in the below author licence), an exclusive licence and/or a non-exclusive licence for contributions from authors who are: i) UK Crown employees; ii) where BMJ has agreed a CC-BY licence shall apply, and/or iii) in accordance with the terms applicable for US Federal Government officers or employees acting as part of their official duties; on a worldwide, perpetual, irrevocable, royalty-free basis to BMJ Publishing Group Ltd ("BMJ") its licensees and where the relevant Journal is co-owned by BMJ to the co-owners of the Journal, to publish the Work in this journal and any other BMJ products and to exploit all rights, as set out in our [licence](#).

The Submitting Author accepts and understands that any supply made under these terms is made by BMJ to the Submitting Author unless you are acting as an employee on behalf of your employer or a postgraduate student of an affiliated institution which is paying any applicable article publishing charge ("APC") for Open Access articles. Where the Submitting Author wishes to make the Work available on an Open Access basis (and intends to pay the relevant APC), the terms of reuse of such Open Access shall be governed by a Creative Commons licence – details of these licences and which [Creative Commons](#) licence will apply to this Work are set out in our licence referred to above.

Other than as permitted in any relevant BMJ Author's Self Archiving Policies, I confirm this Work has not been accepted for publication elsewhere, is not being considered for publication elsewhere and does not duplicate material already published. I confirm all authors consent to publication of this Work and authorise the granting of this licence.

## Title Page

### Manuscript Title

Diagnostic features, management, and prognosis of Type 2 myocardial infarction: A systematic review and meta-analysis.

### Authors

Dr Kyle White

Princess Alexandra Hospital, Brisbane, Australia

University of Queensland, Brisbane, Australia

BSc, MBBS, FRACP, FCICM, MPH

Dr Mansey Kinarivala

Princess Alexandra Hospital, Brisbane, Australia

MBBS, FRACP

A/Prof Ian Scott

Princess Alexandra Hospital, Brisbane, Australia

University of Queensland, Brisbane, Australia

MEd, MHA, MBBS, FRACP

### Corresponding Author

Dr Kyle White

Princess Alexandra Hospital

199 Ipswich Road, Wolloongabba, 4102

Ph: +61731762111

Email: [kyle.white@health.qld.gov.au](mailto:kyle.white@health.qld.gov.au)

### Manuscript Word Count

3068

## Abstract

### Importance

Distinguishing type 2 (T2MI) from type 1 myocardial infarction (T1MI) in clinical practice can be difficult, and the management and prognosis for T2MI remain uncertain.

### Objective

To compare precipitating factors, risk factors, investigations, management, and outcomes for T2MI and T1MI.

### Data Sources

MEDLINE and EMBASE databases as well as reference list of recent articles were searched January 2009 to December 2020 for term “type 2 myocardial infarction”.

### Study Selection

Studies were included if they analysed if universal definition of MI was used and reported quantitative data on at least one variable of interest.

### Data Extraction and Synthesis

Data was pooled using random-effect meta-analysis. Risk of bias was assessed using Newcastle-Ottawa Quality Assessment Form. Preferred Reporting Items for Systematic Reviews and Meta-analyses (PRISMA) guidelines were followed. All review stages were conducted by two reviewers.

### Main Outcomes and Measures

Risk factors, presenting symptoms, cardiac investigations such as troponin and angiogram, management, and outcomes such as mortality.

### Results

41 cohort studies comprising 116,565 T1MI and 15,258 T2MI patients were included. Compared to T1MI, T2MI patients were: more likely to have pre-existing chronic kidney disease (OR 1.89; 95%CI 1.59-2.25) and chronic heart failure (OR 2.34; 95%CI 1.87-2.93), less likely to present with typical cardiac symptoms of chest pain (OR 0.19; 95%CI 0.15-0.26) and more likely to present with dyspnoea (OR 2.83; 95%CI 1.96-4.08); more likely to demonstrate non-specific ST-T wave changes on electrocardiography (OR 2.62; 95%CI 1.81-3.79) and less likely to show ST elevation (OR 0.22; 95%CI 0.18-0.28); less likely to undergo coronary angiography (OR 0.09; 95%CI 0.06-0.12) and percutaneous coronary intervention (OR 0.06; 95%CI 0.04-0.10) or receive cardioprotective medications, such as statins (OR 0.25; 95%CI 0.17-0.36) and beta-blockers (OR 0.46; 95%CI 0.34-0.62). T2MI had more risk of all cause one-year mortality (OR 2.94; 95%CI 2.07-4.17), with no differences in cardiovascular deaths (OR 1.17; 95%CI 0.70-1.97).

### Conclusion and Relevance

This review has identified clinical, management and survival differences between T2MI and T1MI with greater precision and scope than previously reported. Differential use of coronary

1  
2  
3 revascularisation and cardioprotective medications highlight ongoing uncertainty of their utility in  
4 T2MI compared to T1MI.  
5  
6  
7  
8  
9  
10  
11  
12

## 13 Strength and Limitations

- 14 • Inclusion of all contemporary cohort studies in the troponin era
  - 15 • Large patient population of T2MI and T1MI patients analysed allowing high level of precision
  - 16 • Wide array of clinically significant variables assessed providing a comprehensive analysis
  - 17 • Analysis of crude mortality due to individual patient data not available
- 18  
19  
20  
21  
22  
23  
24  
25  
26  
27  
28  
29  
30  
31  
32  
33  
34  
35  
36  
37  
38  
39  
40  
41  
42  
43  
44  
45  
46  
47  
48  
49  
50  
51  
52  
53  
54  
55  
56  
57  
58  
59  
60

## Introduction

The clinical definition of myocardial infarction has evolved over time (Table S1). The 2007 Universal Definition of Myocardial Infarction included a subset of MI that was secondary to aetiologies unrelated to underlying occlusive coronary artery disease (1). In 2012, the Third Universal Definition of Myocardial Infarction Consensus Document (2) gave rise to the aetiological distinction between T1MI, defined as MI due to plaque erosion and/or rupture, and T2MI, defined as MI caused by increased oxygen demand or decreased blood supply, in the absence of acute plaque rupture or coronary thrombosis. More recently, in 2018, the Fourth Universal definition of MI updated concepts of T2MI regarding specific situations associated with oxygen demand and supply imbalance and the relevance of the presence or absence of underlying coronary artery disease to therapy and prognosis (3).

In clinical practice, distinguishing T2MI from T1MI based on clinical presentation, electrocardiograph (ECG) features and cardiac troponin (cTn) values can be difficult. In the absence of randomised controlled trials that have evaluated different investigational and therapeutic interventions in patients with T2MI, there is uncertainty around the appropriate management of such patients, particularly those with known or suspected coronary artery disease. Past reviews have assessed one or more attributes of T2MI in comparison to T1MI (4-8) but, to our knowledge, none have undertaken a comprehensive analysis of symptoms, physical signs, investigation results, management regimens and clinical outcomes of T2MI versus T1MI.

We undertook a systematic review of observational studies with the aims of identifying diagnostic and investigational findings which can assist clinicians to better distinguish T2MI from T1MI, different management strategies in T2MI compared to T1MI and differences in clinical outcomes between T2MI and T1MI.

## Methods

### Study design

The review was undertaken in accordance with recommendations of the Cochrane Collaboration and Preferred Reporting Items for Systematic Reviews and Meta-Analyses (PRISMA) statement (9). Our review was registered on PROSPERO prior to commencement (Registration number: CRD42021237746). MEDLINE and EMBASE databases were searched for all studies published between January 1st, 2009, and December 31st, 2020, using search terms to identify all studies related to T2MI (Tables S2, S3). Reference lists of all relevant articles were also assessed to identify additional relevant studies. The study PRISMA flowchart is shown in Figure 1.

Studies were selected if they compared patient populations with T2MI and T1MI, used a universal definition of MI and included at least one variable of interest. Studies were excluded if no full text was available or less than 200 participants. Initial screening of titles and abstracts for eligible studies was performed independently by two authors (MK, KW), as was full text review for inclusion, with any differences in review settled by consensus agreement.

### Data collection and synthesis

1  
2  
3 Data pertaining to all variables of interest were collected from all included studies using a  
4 standardised proforma by one author (MK) and independently reviewed by the second author (KW).  
5 These variables comprised: study dates, design, sample size, definition used to define T2MI and  
6 T1MI, patient demographics, pre-existing medical conditions, precipitating factors, clinical  
7 symptoms, ECG findings, laboratory values, echocardiographic results, any clinical interventions or  
8 medical treatments administered, and clinical outcomes observed.  
9  
10

11 Data on variables reported as, or able to be converted to, raw numbers, were pooled from all studies  
12 and subject to comparative meta-analysis using Review Manager (RevMan, Computer program.  
13 Version 5.3. Copenhagen: The Nordic Cochrane Centre, The Cochrane Collaboration, 2014). For each  
14 variable, the weighted odds ratio (OR) comparing T2MI to T1MI, and its 95% confidence interval (CI),  
15 was calculated using the random effects method in anticipation of study heterogeneity of at least  
16 moderate degree ( $I^2$  statistic of heterogeneity >50%) (10). In addition to the weighted OR, we also  
17 report the crude, unweighted total event rates for each variable subject to meta-analysis in order to  
18 provide a more clinically meaningful estimate of the prevalence of these events in each patient  
19 group in view of the large sample sizes. Studies reporting mean or median values only are also  
20 reproduced as reported in the original study.  
21  
22  
23  
24

25 Risk of bias within each study was assessed using the Newcastle-Ottawa quality assessment tool for  
26 cohort studies (11, 12), with scores 7-8 denoting good quality studies, 4-6 fair quality, and 0-3 poor  
27 quality.  
28  
29

## 30 Patient and Public Involvement

31 No patient involved.  
32  
33

## 34 Results

35 A total of 41 studies were included for analysis (13-53) and their characteristics are summarised in  
36 the online supplement, Table S4. They comprised a total of 131,823 participants of whom 116,565  
37 participants (88%) were identified as T1MI and 15,258 (12%) as T2MI.  
38  
39

40 The 2007 definition (1) was used in 8 (19%) studies (15-17, 28, 30, 44, 45, 52), the 2012 definition  
41 (2) was used in 25 (61%) studies (13, 18, 20-22, 24-27, 31-36, 38, 40, 41, 43, 46-49, 51, 53), and the  
42 2018 definition (3) was used 8 (19%) studies (14, 19, 23, 29, 37, 39, 42, 50). Of the 41 studies, 18  
43 (44%) were prospective (15-17, 19, 20, 23, 30, 34, 35, 37, 38, 44, 45, 47-49, 51, 52) and 23 (56%)  
44 were retrospective (13, 14, 18, 21, 22, 24-29, 31-33, 36, 39-43, 47, 50, 53).  
45  
46  
47  
48

## 49 Risk of bias assessment

50 Of the 41 studies, 32 (78%) were assessed as good quality (13, 15-20, 23, 24, 28-36, 38-47, 49, 53), 6  
51 (15%) as fair quality (14, 25-27, 50), and 3 (7%) as poor quality (21, 37, 48), as summarised in online  
52 supplement, Table S5. Selection bias resulting in unrepresentative cohorts such as admission criteria  
53 to coronary care units or entry criteria into MI registries favouring T1MI (14, 21, 25-27, 37, 48, 50),  
54 absence of independent adjudication of MI type as T1MI or T2MI (37, 39, 48), non-comparability of  
55 T1MI and T2MI cohorts (21, 25, 26, 48), poorly specified outcome measures (37, 39, 48) and short  
56 follow-up period resulting in few events (14, 21, 25, 37) comprised most forms of bias.  
57  
58  
59  
60



## Participant characteristics

Patients with T1MI had a median age range of 60-82 years in the included studies that did not select a specific age population, compared to a median age range of 62-79 years in patients with T2MI. The sex distribution was also similar, with 59.8% and 54% of patients with T1MI and T2MI being male respectively.

Regarding pre-existing medical conditions (Table 1), T2MI patients compared to T1MI patients were more likely to have chronic kidney disease (26.9% vs 19.3%; OR 1.89; 95%CI 1.59-2.25), chronic heart failure (19% vs 8.1%; OR 2.34; 95%CI 1.87-2.93), atrial fibrillation (22.9% vs 6.1%; OR 3.02; 95%CI 2.29-3.99), and hypertension (66.8% vs 61.3%; OR 1.22; 95%CI 1.05-1.43). Patients with T2MI were less likely to have dyslipidaemia (43.4% vs 45.9%; OR 0.74; 95%CI 0.58-0.94) and smoking history (37.2% vs 53.9%; OR 0.61; 95%CI 0.50-0.74). There was no difference in the prevalence of type 2 diabetes mellitus or ischaemic heart disease between the two groups.

## Precipitating factors

Less than half of the studies (n=18; 44%) included data on precipitating factors associated with T2MI (13, 15, 16, 18, 20, 22-25, 28, 32, 33, 36, 41, 45, 46, 51, 52). Data on each precipitating factor was not constantly available across the studies, for example only 18 studies representing 45% of T2MI patients assessed for presence of arrhythmia

The most common precipitant was sepsis (35.9%), followed by arrhythmia (29.8%), and heart failure 28.6% (Table S6), with non-cardiac surgery being deemed a cause in 12.2% of cases where data for this variable were collected.

## Presenting clinical features

As summarised in Table S7, compared to T1MI patients, T2MI patients were less likely to present with typical cardiac symptoms of chest pain (59.2% vs 87.7%; OR 0.19; 95%CI 0.15-0.26) or discomfort in the arm or shoulder (8.5% vs 35%; OR 0.18; 95%CI 0.11-0.3). In contrast, T2MI patients were more likely to present with dyspnoea (27.6% vs 9.9%; OR 2.83; 95%CI 1.96-4.08).

## Investigations

With regards to ECG findings on presentation (Table S8), ST elevation (13.4% vs 42.1%; OR 0.22; 95%CI 0.18-0.28) and pathological Q waves (6.7% vs 20.8%; OR 0.38; 95%CI 0.20-0.71) were less likely to be observed in T2MI than in T1MI. In contrast, non-specific ST-T wave changes (24.7% vs 10.8%; OR 2.62; 95%CI 1.81-3.79), and atrial arrhythmias (27% vs 10.2%; OR 3.70; 95%CI 2.87-4.77) were more common among T2MI than T1MI patients. No differences between groups were seen in the frequency of ST depression or T wave inversion.

Cardiac troponin results were reported in 27 studies (Table S8), with 19 reporting cTnI (13, 18-20, 26, 28, 30, 33, 35, 36, 38-40, 44-47, 49, 51), 6 reporting cTnT (15, 16, 31, 32, 42, 43), one reporting both (21) and one not specifying the assay used (24). Only two of the 27 studies reporting troponin failed to state the upper limit of normal (ULN) of the assay used (24, 32). The troponin assays, and therefore units and reference ranges, varied between the studies, preventing direct comparison of troponin values. As a result, troponin values were converted to a multiple of the upper limit of normal for each assay to allow direct comparison. For peak troponin, patients with T1MI had a

1  
2  
3 higher and wider range of 5-1702 times the ULN compared to patients with T2MI with a range of  
4 2.8-447 times the ULN. Studies yielded mixed results as to whether the magnitude of change (or  
5 delta) in serial cardiac troponin assays was more predictive of T2MI or T1MI compared to absolute  
6 values of peak levels (34). Lowering the diagnostic threshold for troponin with the advent of more  
7 sensitive troponin assays preferentially increased the numbers of patients identified with T2MI by up  
8 to 50% (37), with more recent studies showing the incidence of T2MI equalling or exceeding that of  
9 T1MI (16, 34, 37).  
10  
11  
12

13 Echocardiography was less frequently performed among T2MI than T1MI patients (47.9% vs 55.5%;  
14 OR 0.44; 95%CI 0.20-0.96) and when reported (Table S8), there was no difference in the prevalence  
15 of regional wall motion abnormalities or the level of left ventricular (LV) function, with median LV  
16 ejection fraction being 42.3%-55% in T1MI patients and 40%-56% in T2MI patients.  
17  
18

19 Coronary angiography was also less frequently performed among T2MI than in T1MI patients (34.4%  
20 vs 83.4%; OR 0.09; 95%CI 0.06-0.12, Table S8). When performed, T2MI patients were less likely to  
21 demonstrate obstructive coronary artery disease (34% vs 44.9%; OR 0.16; 95%CI 0.05-0.54), with  
22 obstruction variously defined as 50%-70% occlusion of one or more vessels.  
23  
24

## 25 Management

26 T2MI patients, compared to T1MI patients, were significantly less likely to receive conventional  
27 cardioprotective medications (Table 2), comprising beta blockers (61.6% vs 78.2%; OR 0.46; 95%CI  
28 0.34-0.62), anti-platelet agents (57.4% vs 87.3%; OR 0.24; 95%CI 0.17-0.36) and statins (55.3% vs  
29 87.2%; OR 0.25; 95%CI 0.17-0.36). Of note, T2MI patients were more likely to receive diuretics  
30 (46.5% vs 18.8%; OR 1.99; 95%CI 1.56-2.53) or anti-coagulants (26.1% vs 21.3%; OR 1.90; 95%CI  
31 1.17-3.10).  
32  
33

34 Percutaneous coronary intervention (PCI) (20% vs 75.1%; OR 0.06; 95%CI 0.04-0.10) and coronary  
35 artery bypass surgery (2.4% vs 6.1%; OR 0.23; 95%CI 0.12-0.42) were also significantly less likely to  
36 be performed in T2MI patients than T1MI patients.  
37  
38  
39

## 40 Prognosis

41 T2MI patients had significantly increased risk of all-cause death compared to patients with T1MI in  
42 both short- and long-term follow-up (Table 3). Specifically, compared to T1MI patients, T2MI  
43 demonstrated increased all-cause mortality in-hospital (12.5% vs 5.8%; OR 1.94; 95%CI 1.35-2.79,  
44 Figure S44), at one-year (20.6% vs 8.8%; OR 2.94; 95%CI 2.07-4.17, Figure 1) and at 5 to 10 years,  
45 (53.7% vs 28.5%, OR 3.24; 95%CI 2.73-3.84, Figure 2). In contrast, there were no differences  
46 between T2MI and T1MI patients in the risk of cardiovascular related in-hospital mortality (6% vs  
47 3.8%; OR 1.17; 95%CI 0.70-1.97) or short-term mortality at 120-180 days (23.0% vs 12.5%; OR 1.34;  
48 95%CI 0.63-2.85).  
49  
50  
51  
52  
53

## 54 Discussion

55 Up to three quarters of all myocardial infarctions in routine care can be T2MI (34, 35), the  
56 management of which is different to that for T1MI. Distinguishing T2MI from T1MI on clinical criteria  
57 is often challenging, the management strategies used by clinicians in real-world practice for T2MI  
58 often vary, and the clinical outcomes of T2MI compared to T1MI, particularly over the long term,  
59  
60

1  
2  
3 have been uncertain. This comprehensive review of contemporary studies provides information that  
4 helps characterise these two groups of patients according to multiple variables and may assist in  
5 clinical decision-making and prognostication.  
6

7  
8 In this review, T2MI patients were older with more medical comorbidities than T1MI patients, as  
9 noted in a recent meta-analysis (6). Our review highlighted the much higher incidence of pre-existing  
10 generalised vascular disease, atrial fibrillation, renal impairment, and heart failure among T2MI  
11 patients.  
12

13 Sepsis (10, 17, 28) and anaemia (52) ranked highly as triggers, together with other acute cardiac  
14 events such as valve dysfunction or arrhythmias. In one study, a more favourable prognosis in T2MI  
15 was seen when the principal trigger was arrhythmia, in comparison with non-cardiac surgery,  
16 hypotension, anaemia or hypoxia (30). In another study, only shock syndromes were triggers  
17 portending a worse prognosis compared to all other triggers (33). In our analysis, non-cardiac  
18 surgery as a trigger of T2MI was less frequent than reported by other investigators (27) whereby  
19 peri-operative stressors including blood loss, anaesthesia induced hypotension and wound infections  
20 cause imbalance in myocardial contractility, oxygen demand and blood flow (54).  
21  
22  
23

24 Analysis of cTn levels showed uniformly higher values in T1MI than T2MI which accord with one  
25 review (5) reporting cTn values 30% to 94% higher in patients with T1MI, and which other  
26 investigators regard as being highly specific diagnostic markers for T1MI (54).  
27  
28

29  
30 Coronary angiography and revascularisation were both performed much less frequently in T2MI than  
31 in T1MI patients. Treating physicians may perceive invasive strategies as being contraindicated or  
32 potentially harmful in the presence of various co-morbidities more commonly seen in T2MI and  
33 which are associated with competing mortality risk. In our pooled data, only 1 in 3 T2MI patients  
34 who underwent angiography demonstrated obstructive coronary artery disease, although this figure  
35 may be an underestimate due to selection bias whereby younger, less multi-morbid patients  
36 preferentially underwent angiography. In contrast, in the CASABLANCA cohort study where all  
37 consecutive patients with incident T2MI underwent angiography, 47.7% demonstrated  $\geq 70\%$   
38 stenosis in at least 2 major coronary arteries (55). These conflicting findings question whether  
39 patients presenting with T2MI would benefit from routine use of invasive strategies that define  
40 coronary anatomy and, if plaque rupture or critical stenoses are seen, prompt revascularisation, with  
41 resultant improvement in patient outcomes. In one study (19), angiography unmasked acute plaque  
42 rupture in 29% of patients classified as T2MI. In another study, among 11.4% of 236 patients with  
43 T2MI who underwent revascularisation, the odds of all-cause death were reduced by 67% compared  
44 to the remaining 88.6% who were not revascularized (24). In contrast, in a third more rigorous study  
45 comparing T2MI versus T1MI patients following PCI within 24 hours of symptom onset, and adjusting  
46 results using multivariate logistic regression analysis and inverted probability weighting, (15) in-  
47 hospital mortality was lower in patients with T1MI and receiving PCI (OR 0.47; 95% CI 0.40–0.55;  $p <$   
48 0.001), but not in those with T2MI receiving PCI (OR 1.09; 95% CI 0.62–1.94;  $p = 0.763$ ). However, all  
49 these studies are observational, so completion of randomised trials, such as the Appropriateness of  
50 Coronary investigation in myocardial injury and Type 2 myocardial infarction (ACT-2) trial which is  
51 currently in recruitment (54), will hopefully provide a more definitive answer.  
52  
53  
54  
55  
56  
57  
58  
59  
60

1  
2  
3 The lower use of cardioprotective agents in T2MI patients remains unexplained, reflecting either  
4 uncertainty around their cardioprotective utility in T2MI, or concerns about the potential for adverse  
5 interactions with other drugs or diseases commonly seen in multi-morbid T2MI patients. The higher  
6 use of diuretics in the T2MI population likely reflects the higher prevalence of heart failure and  
7 hypertension.  
8  
9

10 An important finding is the much higher all-cause in-hospital and one-year mortality in T2MI  
11 compared to T1MI patients, which is similar to the two-fold greater mortality rate in T2MI noted in a  
12 recent systematic review of 9 studies (8). In our review, this excess mortality was not driven by an  
13 excess of cardiovascular deaths, and likely reflects the competing risks of older age and multiple co-  
14 morbidities, rather than underlying multi-vessel obstructive coronary artery disease which was seen  
15 in 30-50% of T2MI patients (27, 32). Studies yielded mixed results as to whether coronary artery  
16 disease is an independent predictor of T2MI (21, 43), while others question the angiographic  
17 distinction between T2MI and T1MI. For example, in a study of 450 consecutive patients with MI  
18 who all underwent coronary angiography within 24 hours of symptom onset, 145 (32.2%) patients  
19 had 'true' T1MI (acute atherothrombosis and no systemic triggers), 114 (25.3%) had 'true' T2MI (no  
20 atherothrombosis and systemic triggers), 61 (13.6%) patients had neither, and 130 (28.9%) patients  
21 had both, suggesting a discordance of angiographic and clinical definitions of MI type in 42.5% of  
22 patients (41).  
23  
24  
25  
26  
27

28 Our review has several limitations. First, in the absence of individual patient data from all included  
29 studies, we were unable to perform multivariate regression analysis in identifying weighted  
30 predictors of diagnosis, management, or prognosis of T2MI. Second, we did not perform separate  
31 analyses of cohort studies that used different versions of the Universal Definition of MI or used  
32 different troponin thresholds to define MI, which may impact management and prognosis. The only  
33 study which compared T2MI cohorts as defined by the 2007 and the 2012 versions revealed a lower  
34 frequency of co-morbidities and less use of cardioprotective medications in the 2012 cohort, likely  
35 due to less severe MIs as a result of using more sensitive troponin assays (23). Third, we did not  
36 collect haemodynamic variables in analysing clinical presentations as these were very inconsistently  
37 reported. Fourth, our mortality meta-analyses relied on crude mortality rates reported in each study,  
38 with 56% of studies (15-20, 23-29, 31, 32, 35, 36, 38, 41-43, 46, 47) also undertaking multivariate  
39 regression and/or competing risk analyses and reporting adjusted mortality rates which, for the  
40 T2MI cohorts in general, tended to be lower, and the differences in rates compared to those of T1MI  
41 were of smaller magnitude. Fifth, we did not analyse 30-day readmission rates as these were  
42 reported in only three studies (13, 14, 24). Sixth, we did not perform sensitivity analyses comparing  
43 results of prospective versus retrospective studies, as neither group demonstrated less or more risk  
44 of bias than the other, or compare results of good quality studies against fair/poor quality studies as  
45 the latter comprised only 16.7% (22,001/131,823) of all patients. Finally, we did not attempt sub-  
46 analyses based on risk stratification using validated risk scores or seek to identify predictive models  
47 for mortality, as such analyses were reported in only two studies (27, 41).  
48  
49  
50  
51  
52  
53  
54

55 The strengths of this review are the inclusion of all contemporary cohort studies in the troponin era,  
56 analysis of a broader range of variables than those of previous studies, and the more precise  
57 discernment of clinically meaningful differences between the two MI populations in patient  
58 characteristics, patterns of care and outcomes.  
59  
60

Our findings help to inform clinical diagnosis and management, hospital coding and epidemiological trending, quality of care indicators and inter-hospital benchmarking of performance relating to the care of patients with a diagnosis of T2MI.

## Conclusion

This review has identified differences between T2MI and T1MI patients in presenting clinical features, investigation and management profiles, and clinical outcomes with greater scope and precision than previously reported. These findings may assist clinicians to better recognise T2MI and advise patients about its sequelae. The review has also helped define persisting gaps in our understanding of the utility and prognostic effects of invasive investigations, revascularization strategies and cardioprotective medications in T2MI patients that can only be remedied by conducting more randomised trials that enrol such patients.

## Tables

Table 1. Pre-existing medical conditions in patients with T2MI versus T1MI.

| Pre-existing medical condition | T2MI                                            |                          |       | T1MI                                            |                          |       | Odds ratio* (95% CI) |
|--------------------------------|-------------------------------------------------|--------------------------|-------|-------------------------------------------------|--------------------------|-------|----------------------|
|                                | Number of patients with the specified condition | Total number of patients | %     | Number of patients with the specified condition | Total number of patients | %     |                      |
| CAD                            | 3915                                            | 11706                    | 33.4% | 27538                                           | 110213                   | 25.0% | 1.13 [0.96, 1.32]    |
| Type 2 DM                      | 3420                                            | 13560                    | 25.2% | 27169                                           | 110833                   | 24.5% | 0.98 [0.86, 1.10]    |
| HTN                            | 8296                                            | 12424                    | 66.8% | 64648                                           | 105505                   | 61.3% | 1.22 [1.05, 1.43]    |
| Dyslipidaemia                  | 4626                                            | 10652                    | 43.4% | 40099                                           | 87366                    | 45.9% | 0.74 [0.58, 0.94]    |
| Smoker                         | 4213                                            | 11332                    | 37.2% | 49796                                           | 92377                    | 53.9% | 0.61 [0.50, 0.74]    |
| Obesity                        | 1225                                            | 3672                     | 33.4% | 30963                                           | 56970                    | 54.3% | 0.63 [0.46, 0.87]    |
| Renal failure                  | 2002                                            | 7443                     | 26.9% | 15969                                           | 82882                    | 19.3% | 1.89 [1.59, 2.25]    |
| Heart failure                  | 1949                                            | 10276                    | 19.0% | 7471                                            | 91700                    | 8.1%  | 2.34 [1.87, 2.93]    |
| PVD                            | 584                                             | 5856                     | 10.0% | 2066                                            | 41280                    | 5.0%  | 1.33 [1.05, 1.69]    |
| CVD                            | 1164                                            | 9941                     | 11.7% | 7669                                            | 105310                   | 7.3%  | 1.48 [1.30, 1.69]    |
| Atrial fibrillation            | 836                                             | 3645                     | 22.9% | 1220                                            | 19843                    | 6.1%  | 3.02 [2.29, 3.99]    |
| COPD                           | 800                                             | 5018                     | 15.9% | 823                                             | 48375                    | 1.7%  | 1.94 [1.22, 3.08]    |
| Illicit drug Use               | 46                                              | 204                      | 22.5% | 8                                               | 220                      | 3.6%  | 8.15 [1.03, 64.46]   |

1  
2  
3 \*Comparing T2MI with T1MI patients, with odds ratio adjusted according to study weighting using random  
4 effects meta-analysis  
5 Abbreviations: CAD- coronary heart disease, DM- diabetes mellitus, HTN- hypertension, BMI- body mass  
6 index, PVD- peripheral vascular disease, CVD- cerebrovascular disease, COPD- chronic obstructive  
7 pulmonary disease  
8  
9  
10  
11  
12  
13  
14  
15  
16  
17  
18  
19  
20  
21  
22  
23  
24  
25  
26  
27  
28  
29  
30  
31  
32  
33  
34  
35  
36  
37  
38  
39  
40  
41  
42  
43  
44  
45  
46  
47  
48  
49  
50  
51  
52  
53  
54  
55  
56  
57  
58  
59  
60

For peer review only

Table 2. Medical management and invasive interventions in patients with T2MI versus T1MI.

| Intervention        | T2MI                                |                          |       | T1MI                                |                          |       | Odds ratio*<br>(95% CI) |
|---------------------|-------------------------------------|--------------------------|-------|-------------------------------------|--------------------------|-------|-------------------------|
|                     | No. patients receiving intervention | Total number of patients | %     | No. patients receiving intervention | Total number of patients | %     |                         |
| <b>Medication</b>   |                                     |                          |       |                                     |                          |       |                         |
| Beta blockers       | 6113                                | 9926                     | 61.6% | 78733                               | 100645                   | 78.2% | 0.46 [0.34, 0.62]       |
| ACEI / ARB          | 4692                                | 9245                     | 50.8% | 69684                               | 99281                    | 70.2% | 0.52 [0.41, 0.66]       |
| Anti-platelets      | 5742                                | 10002                    | 57.4% | 88612                               | 101492                   | 87.3% | 0.24 [0.17, 0.36]       |
| Anti-coagulants     | 1738                                | 6658                     | 26.1% | 17048                               | 79903                    | 21.3% | 1.90 [1.17, 3.10]       |
| Anti-anginal agents | 2322                                | 3594                     | 64.6% | 55149                               | 60256                    | 91.5% | 0.51 [0.26, 1.00]       |
| Diuretics           | 2042                                | 4388                     | 46.5% | 11877                               | 63267                    | 18.8% | 1.99 [1.56, 2.53]       |
| Statins             | 4344                                | 7858                     | 55.3% | 71915                               | 82430                    | 87.2% | 0.25 [0.17, 0.36]       |
| <b>Invasive</b>     |                                     |                          |       |                                     |                          |       |                         |
| PCI                 | 2267                                | 11339                    | 20.0% | 78009                               | 103913                   | 75.1% | 0.06 [0.04, 0.10]       |
| CABG                | 117                                 | 4854                     | 2.4%  | 4010                                | 66219                    | 6.1%  | 0.23 [0.12, 0.42]       |

\*Comparing T2MI with T1MI patients, with odds ratio adjusted according to study weighting using random effects meta-analysis  
 Abbreviations: ACEI- Angiotensin converting enzyme inhibitors, ARB- Angiotensin receptor blockers; CI=confidence interval; T2MI=type 2 myocardial infarction; T1MI=type 1 myocardial infarction; PCI=percutaneous coronary intervention; CABG=coronary artery bypass graft

Table 3. Outcomes in patients with T2MI versus T1MI.

| Outcomes                        | T2MI                      |                          |       | T1MI                      |                          |       | Odds ratio*<br>(95% CI) |
|---------------------------------|---------------------------|--------------------------|-------|---------------------------|--------------------------|-------|-------------------------|
|                                 | No. patients with outcome | Total number of patients | %     | No. patients with outcome | Total number of patients | %     |                         |
| CV in-hospital mortality        | 212                       | 3512                     | 6.0%  | 891                       | 23736                    | 3.8%  | 1.17 [0.70, 1.97]       |
| All-cause in-hospital mortality | 667                       | 5321                     | 12.5% | 1508                      | 25997                    | 5.8%  | 1.94 [1.35, 2.79]       |
| Short-term all-cause mortality  | 204                       | 887                      | 23.0% | 250                       | 1998                     | 12.5% | 1.34 [0.63, 2.85]       |
| 1-year all-cause mortality      | 979                       | 4743                     | 20.6% | 3660                      | 41691                    | 8.8%  | 2.94 [2.07, 4.17]       |
| 2-year all-cause mortality      | 246                       | 926                      | 26.6% | 428                       | 2587                     | 16.5% | 1.63 [1.11, 2.41]       |
| 3-year all-cause mortality      | 193                       | 525                      | 36.8% | 710                       | 4305                     | 16.5% | 2.00 [1.07, 3.76]       |
| Long-term all-cause mortality   | 1453                      | 2708                     | 53.7% | 1320                      | 4633                     | 28.5% | 3.24 [2.73, 3.84]       |

\*Comparing T1MI with T2MI patients, with odds ratio adjusted according to study weighting using random effects meta-analysis  
Abbreviations: CV- Cardiovascular, MACE- Major adverse cardiovascular events; T2MI=type 2 myocardial infarction; T1MI=type 1 myocardial infarction; CI=confidence interval



### Contribution Statement

All authors contribute equally to the research proposal, data acquisition and analysis, as well as, the manuscript preparation.

### Competing Interests

The authors declare there are no conflict of interest with respect the article.

### Funding

This research received no specific grant from any funding agency in the public, commercial or not-for-profit sectors.

### Data Sharing Statement

All data relevant to the study are included in the article or uploaded as supplementary information.

### Ethic Approval Statement

No ethics approval was sought for this research project as no patient data was used.

BMJ Open  
peer review only

## References

1. Thygesen K, Alpert JS, White HD, Jaffe AS, Apple FS, Galvani M, et al. Universal definition of myocardial infarction. *Circulation*. 2007;116(22):2634-53.
2. Thygesen K, Alpert JS, Jaffe AS, Simoons ML, Chaitman BR, White HD, et al. Third universal definition of myocardial infarction. *Circulation*. 2012;126(16):2020-35.
3. Thygesen K, Alpert JS, Jaffe AS, Chaitman BR, Bax JJ, Morrow DA, et al. Fourth Universal Definition of Myocardial Infarction (2018). *J Am Coll Cardiol*. 2018;72(18):2231-64.
4. Lippi G, Sanchis-Gomar F, Cervellin G. Chest pain, dyspnea and other symptoms in patients with type 1 and 2 myocardial infarction. A literature review. *International journal of cardiology*. 2016;215:20-2.
5. Lippi G, Sanchis-Gomar F, Cervellin G. Cardiac troponins and mortality in type 1 and 2 myocardial infarction. *Clinical chemistry and laboratory medicine*. 2017;55(2):181-8.
6. Gupta S, Vaidya SR, Arora S, Bahekar A, Devarapally SR. Type 2 versus type 1 myocardial infarction: a comparison of clinical characteristics and outcomes with a meta-analysis of observational studies. *Cardiovasc Diagn Ther*. 2017;7(4):348-58.
7. Reid C, Alturki A, Yan A, So D, Ko D, Tanguay JF, et al. Meta-analysis Comparing Outcomes of Type 2 Myocardial Infarction and Type 1 Myocardial Infarction With a Focus on Dual Antiplatelet Therapy. *CJC Open*. 2020;2(3):118-28.
8. Wang G, Zhao N, Zhong S, Li J. A systematic review on the triggers and clinical features of type 2 myocardial infarction. *Clin Cardiol*. 2019;42(10):1019-27.
9. Moher D, Liberati A, Tetzlaff J, Altman DG. Preferred reporting items for systematic reviews and meta-analyses: the PRISMA statement. *PLoS medicine*. 2009;6(7):e1000097.
10. Riley RD, Higgins JP, Deeks JJ. Interpretation of random effects meta-analyses. *BMJ*. 2011;342:d549.
11. Stang A. Critical evaluation of the Newcastle-Ottawa scale for the assessment of the quality of nonrandomized studies in meta-analyses. *Eur J Epidemiol*. 2010;25(9):603-5.
12. GA Wells BS, D O'Connell, J Peterson, V Welch, M Losos, P Tugwell. The Newcastle-Ottawa Scale (NOS) for assessing the quality of nonrandomised studies in meta-analyses: Ottawa Hospital Research Institute; 2011 [Available from: [http://www.ohri.ca/programs/clinical\\_epidemiology/oxford.asp](http://www.ohri.ca/programs/clinical_epidemiology/oxford.asp)].
13. Arora S, Strassle PD, Qamar A, Wheeler EN, Levine AL, Misenheimer JA, et al. Impact of Type 2 Myocardial Infarction (MI) on Hospital-Level MI Outcomes: Implications for Quality and Public Reporting. *Journal of the American Heart Association*. 2018;7(7).
14. Balanescu DV, Donisan T, Deswal A, Palaskas N, Song J, Lopez-Mattei J, et al. Acute myocardial infarction in a high-risk cancer population: Outcomes following conservative versus invasive management. *International journal of cardiology*. 2020;313:1-8.
15. Baron T, Hambraeus K, Sundstrom J, Erlinge D, Jernberg T, Lindahl B. Type 2 myocardial infarction in clinical practice. *Heart (British Cardiac Society)*. 2015;101(2):101-6.
16. Baron T, Hambraeus K, Sundstrom J, Erlinge D, Jernberg T, Lindahl B. Impact on Long-Term Mortality of Presence of Obstructive Coronary Artery Disease and Classification of Myocardial Infarction. *Am J Med*. 2016;129(4):398-406.
17. Bonaca MP, Wiviott SD, Braunwald E, Murphy SA, Ruff CT, Antman EM, et al. American College of Cardiology/American Heart Association/European Society of Cardiology/World Heart Federation universal definition of myocardial infarction classification system and the risk of cardiovascular death: observations from the TRITON-TIMI 38 trial (Trial to Assess Improvement in Therapeutic Outcomes by Optimizing Platelet Inhibition With Prasugrel-Thrombolysis in Myocardial Infarction 38). *Circulation*. 2012;125(4):577-83.
18. Cediell G, Gonzalez-Del-Hoyo M, Carrasquer A, Sanchez R, Boqué C, Bardají A. Outcomes with type 2 myocardial infarction compared with non-ischaemic myocardial injury. *Heart (British Cardiac Society)*. 2017;103(8):616-22.

19. Chapman AR, Adamson PD, Shah ASV, Anand A, Strachan FE, Ferry AV, et al. High-Sensitivity Cardiac Troponin and the Universal Definition of Myocardial Infarction. *Circulation*. 2020;141(3):161-71.
20. Chapman AR, Shah ASV, Lee KK, Anand A, Francis O, Adamson P, et al. Long-Term Outcomes in Patients With Type 2 Myocardial Infarction and Myocardial Injury. *Circulation*. 2018;137(12):1236-45.
21. Consuegra-Sánchez L, Martínez-Díaz JJ, de Guadiana-Romualdo LG, Wasniewski S, Esteban-Torrella P, Clavel-Ruipérez FG, et al. No additional value of conventional and high-sensitivity cardiac troponin over clinical scoring systems in the differential diagnosis of type 1 vs. type 2 myocardial infarction. *Clinical chemistry and laboratory medicine*. 2018;56(5):857-64.
22. El-Haddad H, Robinson E, Swett K, Wells GL. Prognostic implications of type 2 myocardial infarctions. 2012.
23. Etaher A, Gibbs OJ, Saad YM, Frost S, Nguyen TL, Ferguson I, et al. Type-II myocardial infarction and chronic myocardial injury rates, invasive management, and 4-year mortality among consecutive patients undergoing high-sensitivity troponin T testing in the emergency department. *European heart journal Quality of care & clinical outcomes*. 2020;6(1):41-8.
24. Furie N, Israel A, Gilad L, Neuman G, Assad F, Ben-Zvi I, et al. Type 2 myocardial infarction in general medical wards: Clinical features, treatment, and prognosis in comparison with type 1 myocardial infarction. *Medicine*. 2019;98(41):e17404.
25. Guimarães PO, Leonardi S, Huang Z, Wallentin L, de Werf FV, Aylward PE, et al. Clinical features and outcomes of patients with type 2 myocardial infarction: Insights from the Thrombin Receptor Antagonist for Clinical Event Reduction in Acute Coronary Syndrome (TRACER) trial. *Am Heart J*. 2018;196:28-35.
26. Hawatmeh A, Thawabi M, Aggarwal R, Abirami C, Vavilin I, Wasty N, et al. Implications of Misclassification of Type 2 Myocardial Infarction on Clinical Outcomes. *Cardiovascular revascularization medicine : including molecular interventions*. 2020;21(2):176-9.
27. Higuchi S, Suzuki M, Horiuchi Y, Tanaka H, Saji M, Yoshino H, et al. Higher non-cardiac mortality and lesser impact of early revascularization in patients with type 2 compared to type 1 acute myocardial infarction: results from the Tokyo CCU Network registry. *Heart Vessels*. 2019;34(7):1140-7.
28. Javed U, Aftab W, Ambrose JA, Wessel RJ, Mouanoutoua M, Huang G, et al. Frequency of elevated troponin I and diagnosis of acute myocardial infarction. *The American journal of cardiology*. 2009;104(1):9-13.
29. Kadesjö E, Roos A, Siddiqui A, Desta L, Lundbäck M, Holzmann MJ. Acute versus chronic myocardial injury and long-term outcomes. *Heart (British Cardiac Society)*. 2019;105(24):1905-12.
30. Lambrecht S, Sarkisian L, Saaby L, Poulsen TS, Gerke O, Hosbond S, et al. Different Causes of Death in Patients with Myocardial Infarction Type 1, Type 2, and Myocardial Injury. *Am J Med*. 2018;131(5):548-54.
31. Landes U, Bental T, Orvin K, Vaknin-Assa H, Rechavia E, Iakobishvili Z, et al. Type 2 myocardial infarction: A descriptive analysis and comparison with type 1 myocardial infarction. *Journal of cardiology*. 2016;67(1):51-6.
32. López-Cuenca A, Gómez-Molina M, Flores-Blanco PJ, Sánchez-Martínez M, García-Narbon A, De Las Heras-Gómez I, et al. Comparison between type-2 and type-1 myocardial infarction: clinical features, treatment strategies and outcomes. *J Geriatr Cardiol*. 2016;13(1):15-22.
33. Meigher S, Thode HC, Peacock WF, Bock JL, Gruberg L, Singer AJ. Causes of Elevated Cardiac Troponins in the Emergency Department and Their Associated Mortality. *Academic emergency medicine : official journal of the Society for Academic Emergency Medicine*. 2016;23(11):1267-73.
34. Nestelberger T, Boeddinghaus J, Badertscher P, Twerenbold R, Wildi K, Breitenbücher D, et al. Effect of Definition on Incidence and Prognosis of Type 2 Myocardial Infarction. *J Am Coll Cardiol*. 2017;70(13):1558-68.

- 1
- 2
- 3 35. Neumann JT, Sørensen NA, Rübtsamen N, Ojeda F, Renné T, Qaderi V, et al. Discrimination of
- 4 patients with type 2 myocardial infarction. *Eur Heart J*. 2017;38(47):3514-20.
- 5 36. Paiva L, Providencia R, Barra S, Dinis P, Faustino AC, Goncalves L. Universal definition of
- 6 myocardial infarction: clinical insights. *Cardiology*. 2015;131(1):13-21.
- 7 37. Pandey AK, Duong T, Swiatkiewicz I, Daniels LB. A Comparison of Biomarker Rise in Type 1
- 8 and Type 2 Myocardial Infarction. *The American journal of medicine*. 2020;133(10):1203-8.
- 9 38. Putot A, Derrida SB, Zeller M, Avondo A, Ray P, Manckoundia P, et al. Short-Term Prognosis
- 10 of Myocardial Injury, Type 1, and Type 2 Myocardial Infarction in the Emergency Unit. *Am J Med*.
- 11 2018;131(10):1209-19.
- 12 39. Putot A, Jeanmichel M, Chagué F, Avondo A, Ray P, Manckoundia P, et al. Type 1 or type 2
- 13 myocardial infarction in patients with a history of coronary artery disease: Data from the emergency
- 14 department. *Journal of Clinical Medicine*. 2019;8(12).
- 15 40. Putot A, Jeanmichel M, Chague F, Manckoundia P, Cottin Y, Zeller M. Type 2 Myocardial
- 16 Infarction: A Geriatric Population-based Model of Pathogenesis. *Aging and disease*. 2020;11(1):108-
- 17 17.
- 18 41. Radovanovic D, Pilgrim T, Seifert B, Urban P, Pedrazzini G, Erne P. Type 2 myocardial
- 19 infarction: incidence, presentation, treatment and outcome in routine clinical practice. *Journal of*
- 20 *cardiovascular medicine (Hagerstown, Md)*. 2017;18(5):341-7.
- 21 42. Raphael CE, Roger VL, Sandoval Y, Singh M, Bell M, Lerman A, et al. Incidence, Trends, and
- 22 Outcomes of Type 2 Myocardial Infarction in a Community Cohort. *Circulation*. 2020;141(6):454-63.
- 23 43. Reed GW, Horr S, Young L, Clevenger J, Malik U, Ellis SG, et al. Associations Between Cardiac
- 24 Troponin, Mechanism of Myocardial Injury, and Long-Term Mortality After Noncardiac Vascular
- 25 Surgery. *Journal of the American Heart Association*. 2017;6(6).
- 26 44. Saaby L, Poulsen TS, Diederichsen AC, Hosbond S, Larsen TB, Schmidt H, et al. Mortality rate
- 27 in type 2 myocardial infarction: observations from an unselected hospital cohort. *Am J Med*.
- 28 2014;127(4):295-302.
- 29 45. Saaby L, Poulsen TS, Hosbond S, Larsen TB, Pyndt Diederichsen AC, Hallas J, et al.
- 30 Classification of myocardial infarction: frequency and features of type 2 myocardial infarction. *Am J*
- 31 *Med*. 2013;126(9):789-97.
- 32 46. Sandoval Y, Smith SW, Sexter A, Thordsen SE, Bruen CA, Carlson MD, et al. Type 1 and 2
- 33 Myocardial Infarction and Myocardial Injury: Clinical Transition to High-Sensitivity Cardiac Troponin I.
- 34 *Am J Med*. 2017;130(12):1431-9.e4.
- 35 47. Sandoval Y, Thordsen SE, Smith SW, Schulz KM, Murakami MM, Pearce LA, et al. Cardiac
- 36 troponin changes to distinguish type 1 and type 2 myocardial infarction and 180-day mortality risk.
- 37 *European heart journal Acute cardiovascular care*. 2014;3(4):317-25.
- 38 48. Sato R, Sakamoto K, Kaikita K, Tsujita K, Nakao K, Ozaki Y, et al. Long-Term Prognosis of
- 39 Patients with Myocardial Infarction Type 1 and Type 2 with and without Involvement of Coronary
- 40 Vasospasm. *Journal of clinical medicine*. 2020;9(6).
- 41 49. Shah AS, McAllister DA, Mills R, Lee KK, Churchhouse AM, Fleming KM, et al. Sensitive
- 42 troponin assay and the classification of myocardial infarction. *Am J Med*. 2015;128(5):493-501.e3.
- 43 50. Singh A, Gupta A, DeFilippis EM, Qamar A, Biery DW, Almarzooq Z, et al. Cardiovascular
- 44 Mortality After Type 1 and Type 2 Myocardial Infarction in Young Adults. *Journal of the American*
- 45 *College of Cardiology*. 2020;75(9):1003-13.
- 46 51. Smilowitz NR, Subramanyam P, Gianos E, Reynolds HR, Shah B, Sedlis SP. Treatment and
- 47 outcomes of type 2 myocardial infarction and myocardial injury compared with type 1 myocardial
- 48 infarction. *Coronary artery disease*. 2018;29(1):46-52.
- 49 52. Stein GY, Herscovici G, Korenfeld R, Matetzky S, Gottlieb S, Alon D, et al. Type-II myocardial
- 50 infarction--patient characteristics, management and outcomes. *PLoS One*. 2014;9(1):e84285.
- 51 53. Truong HH, Victor MV, Imad MA, Kobalava ZD, Parvathy UT, Al-Zakwani I. Mortality and
- 52 morbidity associated with type 2 myocardial infarction: A single-center study. *Annals of Clinical*
- 53 *Cardiology*. 2020;2(2):70-9.
- 54
- 55
- 56
- 57
- 58
- 59
- 60

- 1  
2  
3 54. Alpert JS, Thygesen KA, White HD, Jaffe AS. Diagnostic and therapeutic implications of type 2  
4 myocardial infarction: review and commentary. *Am J Med.* 2014;127(2):105-8.  
5  
6 55. Gaggin HK, Liu Y, Lyass A, van Kimmenade RR, Motiwala SR, Kelly NP, et al. Incident Type 2  
7 Myocardial Infarction in a Cohort of Patients Undergoing Coronary or Peripheral Arterial  
8 Angiography. *Circulation.* 2017;135(2):116-27.  
9  
10  
11  
12  
13  
14  
15  
16  
17  
18  
19  
20  
21  
22  
23  
24  
25  
26  
27  
28  
29  
30  
31  
32  
33  
34  
35  
36  
37  
38  
39  
40  
41  
42  
43  
44  
45  
46  
47  
48  
49  
50  
51  
52  
53  
54  
55  
56  
57  
58  
59  
60

For peer review only

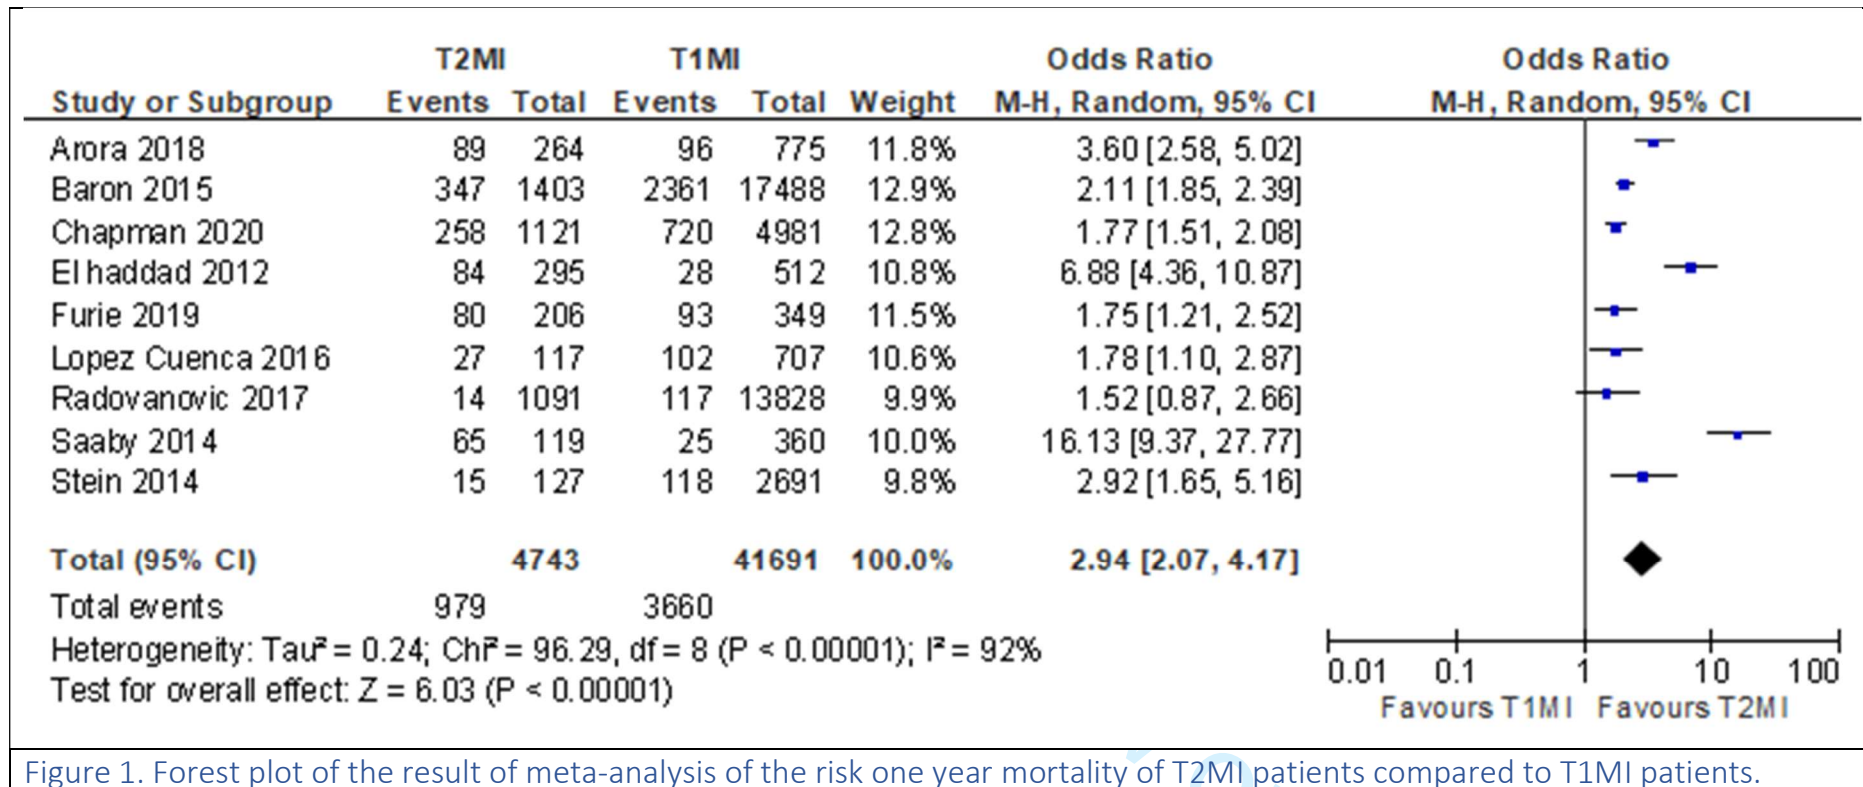

Figure 1. Forest plot of the result of meta-analysis of the risk one year mortality of T2MI patients compared to T1MI patients.

1  
2  
3  
4  
5  
6  
7  
8  
9  
10  
11  
12  
13  
14  
15  
16  
17  
18  
19  
20  
21  
22  
23  
24  
25  
26  
27  
28  
29  
30  
31  
32  
33  
34  
35  
36  
37  
38  
39  
40  
41  
42  
43  
44  
45  
46

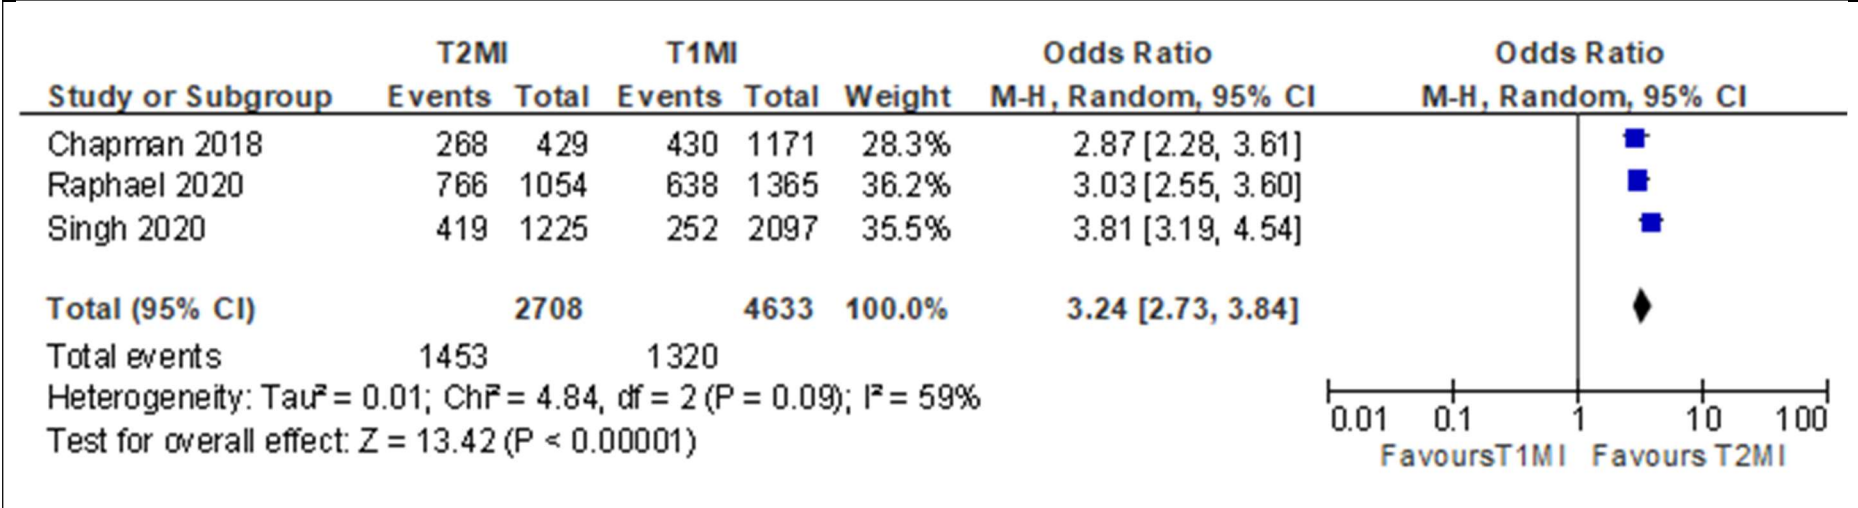

Figure 2. Forest plot of the result of meta-analysis of the risk long-term mortality of T2MI patients compared to T1MI patients.

Review only

Table S1. Evolving definitions of Type 2 Myocardial Infarction.

| Year | Universal Definition of Type 2 Myocardial Infarction                                                                                                                                                                                                                                                                                                                                                                                                                                                                                                                                                    |
|------|---------------------------------------------------------------------------------------------------------------------------------------------------------------------------------------------------------------------------------------------------------------------------------------------------------------------------------------------------------------------------------------------------------------------------------------------------------------------------------------------------------------------------------------------------------------------------------------------------------|
| 2007 | Myocardial infarction secondary to ischaemia due to either increased oxygen demand or decreased supply, e.g. coronary artery spasm, coronary embolism, anaemia, arrhythmias, hypotension or hypertension                                                                                                                                                                                                                                                                                                                                                                                                |
| 2012 | Instances of myocardial injury with necrosis where a condition other than coronary artery disease contributes to an imbalance between myocardial oxygen supply and/or demand e.g. coronary artery spasm, coronary embolism, anaemia, arrhythmias, hypotension or hypertension                                                                                                                                                                                                                                                                                                                           |
| 2018 | <p>Detection of a rise and/or fall of cTn values with at least one value above the 99th percentile URL, and evidence of an imbalance between myocardial oxygen supply and demand unrelated to coronary thrombosis, requiring at least one of the following:</p> <ul style="list-style-type: none"> <li>- Symptoms of acute myocardial ischaemia</li> <li>- New ischaemic ECG changes</li> <li>- Development of pathological Q waves</li> <li>- Imaging evidence of new loss of viable myocardium or new regional wall motion abnormality in a pattern consistent with an ischaemic aetiology</li> </ul> |

Table S1. MEDLINE search strategy.

(type 2 adj3 myocard\*) OR (type-2 adj3 myocard\*) OR (type II adj3 myocard\*) OR (type-II adj3 myocard\*) OR (type 2 adj3 MI) OR (type-2 adj3 MI) OR T2MI OR (supply demand adj3 myocard\*)

Table S2. EMBASE search strategy.

('type 2' NEXT/3 myocard\*) OR ('type-2' NEXT/3 myocard\*) OR ('type ii' NEXT/3 myocard\*) OR ('type-ii' NEXT/3 myocard\*) OR ('type 2' NEXT/3 mi) OR ('type-2' NEXT/3 mi) OR ('t2mi') OR ('supply demand' NEXT/3 myocard\*)



Table S4. Study characteristics.

| Author,<br>Year                    | Patients |      | Design        | Definition<br>of MI | Variables                  |          |                    |                    |                |           |
|------------------------------------|----------|------|---------------|---------------------|----------------------------|----------|--------------------|--------------------|----------------|-----------|
|                                    | T1MI     | T2MI |               |                     | Pre-existing<br>conditions | Symptoms | Investigatio<br>ns | Troponin<br>Values | Managemen<br>t | Prognosis |
| Arora, 2018<br>(1)                 | 775      | 264  | Retrospective | 2012                | X                          |          | X                  | X                  | X              | X         |
| Balanescu,<br>2020 (2)             | 152      | 49   | Retrospective | 2018                |                            | X        | X                  |                    | X              |           |
| Baron,<br>2015 (3)                 | 17488    | 1403 | Prospective   | 2007                | X                          | X        | X                  | X                  | X              | X         |
| Baron,<br>2016 (4)                 | 40501    | 1313 | Prospective   | 2007                | X                          | X        | X                  | X                  | X              |           |
| Bonaca,<br>2012 (5)                | 359      | 42   | Prospective   | 2007                |                            |          |                    |                    |                |           |
| Cediel,<br>2017 (6)                | 376      | 194  | Retrospective | 2012                | X                          | X        | X                  | X                  |                | X         |
| Chapman,<br>2018 (7)               | 1171     | 429  | Prospective   | 2012                | X                          |          | X                  | X                  | X              | X         |
| Chapman,<br>2020 (8)               | 4981     | 1121 | Prospective   | 2018                | X                          | X        | X                  | X                  |                | X         |
| Consuegra-<br>Sanchaz,<br>2018 (9) | 125      | 75   | Retrospective | 2012                | X                          | X        | X                  | X                  |                |           |
| El-Haddad,<br>2012 (10)            | 512      | 295  | Retrospective | 2012                |                            |          |                    |                    |                | X         |
| Etaher,<br>2020 (11)               | 97       | 121  | Prospective   | 2018                | X                          |          | X                  |                    | X              |           |
| Furie, 2019<br>(12)                | 349      | 206  | Retrospective | 2012                | X                          | X        | X                  | X                  | X              | X         |
| Guimaraes,<br>2018 (13)            | 847      | 76   | Retrospective | 2012                | X                          |          | X                  |                    | X              | X         |

|                         |       |      |               |      |   |   |   |   |   |   |
|-------------------------|-------|------|---------------|------|---|---|---|---|---|---|
| Hawatmeh, 2020 (14)     | 664   | 281  | Retrospective | 2012 | X |   | X | X | X |   |
| Higuchi, 2019 (15)      | 12023 | 491  | Retrospective | 2012 | X |   | X |   | X | X |
| Javed, 2009 (16)        | 143   | 64   | Retrospective | 2007 | X |   | X | X |   | X |
| Kadesjo, 2019 (17)      | 1111  | 251  | Retrospective | 2018 | X |   |   |   | X | X |
| Lambrecht, 2018 (18)    | 360   | 119  | Prospective   | 2007 | X |   | X | X |   | X |
| Landes, 2016 (19)       | 107   | 107  | Retrospective | 2012 | X | X | X | X |   |   |
| Lopez-Cuenca, 2016 (20) | 707   | 117  | Retrospective | 2012 | X | X | X | X | X | X |
| Meigher, 2016 (21)      | 340   | 452  | Retrospective | 2012 | X | X | X | X |   | X |
| Nestelberger, 2017 (22) | 684   | 128  | Prospective   | 2012 | X |   | X |   | X | X |
| Neumann, 2017 (23)      | 188   | 99   | Prospective   | 2012 | X |   | X | X |   | X |
| Paiva, 2015 (24)        | 764   | 236  | Retrospective | 2012 | X |   | X | X |   | X |
| Pandey, 2020 (25)       | 97    | 103  | Prospective   | 2018 | X |   |   |   |   |   |
| Putot, 2018 (26)        | 2036  | 847  | Prospective   | 2012 | X |   | X | X |   | X |
| Putot, 2019 (27)        | 365   | 254  | Retrospective | 2018 | X |   | X | X |   | X |
| Putot, 2020 (28)        | 3710  | 862  | Retrospective | 2012 | X |   | X | X |   | X |
| Radovanovic, 2017 (29)  | 13828 | 1091 | Retrospective | 2012 | X |   | X |   | X | X |

|                      |      |      |               |      |   |   |   |   |   |   |
|----------------------|------|------|---------------|------|---|---|---|---|---|---|
| Raphael, 2020 (30)   | 1365 | 1054 | Retrospective | 2018 | X |   | X | X | X | X |
| Reed, 2017 (31)      | 88   | 162  | Retrospective | 2012 |   |   | X | X | X |   |
| Saaby 2013 (32)      | 397  | 144  | Prospective   | 2007 | X |   | X | X |   |   |
| Saaby, 2014 (33)     | 360  | 119  | Prospective   | 2007 | X |   | X | X | X | X |
| Sandoval, 2014 (34)  | 66   | 190  | Retrospective | 2012 | X | X | X | X |   | X |
| Sandoval, 2017 (35)  | 77   | 140  | Prospective   | 2012 | X | X | X | X | X | X |
| Sato, 2020 (36)      | 2834 | 155  | Prospective   | 2012 | X |   | X | X | X | X |
| Shah, 2015 (37)      | 1171 | 429  | Prospective   | 2012 | X | X | X | X | X | X |
| Singh, 2020 (38)     | 2097 | 1225 | Retrospective | 2018 | X |   | X | X | X | X |
| Smilowitz, 2018 (39) | 137  | 146  | Prospective   | 2012 | X | X | X | X | X | X |
| Stein, 2014 (40)     | 2691 | 127  | Prospective   | 2007 | X | X | X |   | X | X |
| Truong, 2020 (41)    | 275  | 175  | Retrospective | 2012 | X | X | X |   | X | X |

Table S5. Risk of bias assessment

| Author, Year                | Selection                        |                          |                           |                                  | Comparability            | Outcome    |                  |                       | Summary          |
|-----------------------------|----------------------------------|--------------------------|---------------------------|----------------------------------|--------------------------|------------|------------------|-----------------------|------------------|
|                             | Representative of Exposed Cohort | Selection of Non-exposed | Ascertainment of Exposure | Outcome was not present at start | Comparability of Cohorts | Assessment | Follow-up Length | Adequacy of Follow-Up |                  |
| Arora, 2018 (1)             | x                                | x                        | x                         | x                                | x                        | x          | x                | x                     | 8 (good quality) |
| Balanescu, 2020 (2)         | 0                                | x                        | x                         | x                                | x                        | x          | 0                | x                     | 6 (fair quality) |
| Baron, 2015 (3)             | x                                | x                        | x                         | x                                | x                        | x          | x                | x                     | 8 (good quality) |
| Baron, 2016 (4)             | x                                | x                        | x                         | x                                | x                        | x          | x                | x                     | 8 (good quality) |
| Bonaca, 2012 (5)            | x                                | x                        | x                         | x                                | x                        | x          | x                | x                     | 8 (good quality) |
| Cediel, 2017 (6)            | x                                | x                        | x                         | x                                | x                        | x          | x                | x                     | 8 (good quality) |
| Chapman, 2018 (7)           | x                                | x                        | x                         | x                                | x                        | x          | x                | x                     | 8 (good quality) |
| Chapman, 2020 (8)           | x                                | x                        | x                         | x                                | x                        | x          | x                | x                     | 8 (good quality) |
| Consuegra-Sanchaz, 2018 (9) | 0                                | 0                        | x                         | x                                | 0                        | x          | 0                | 0                     | 3 (poor quality) |
| El-Haddad, 2012 (10)        | x                                | x                        | x                         | x                                | x                        | 0          | 0                | 0                     | 5 (fair quality) |
| Etaher, 2020 (11)           | x                                | x                        | x                         | x                                | x                        | x          | x                | x                     | 8 (good quality) |
| Furie, 2019 (12)            | x                                | x                        | x                         | x                                | x                        | x          | x                | x                     | 8 (good quality) |
| Guimaraes, 2018 (13)        | 0                                | 0                        | x                         | x                                | 0                        | x          | 0                | x                     | 4 (fair quality) |

|                         |   |   |   |   |   |   |   |   |                  |
|-------------------------|---|---|---|---|---|---|---|---|------------------|
| Hawatmeh, 2020 (14)     | 0 | 0 | x | x | 0 | x | x | 0 | 4 (fair quality) |
| Higuchi, 2019 (15)      | 0 | 0 | x | x | x | x | x | x | 5 (fair quality) |
| Javed, 2009 (16)        | x | x | x | x | x | x | x | x | 8 (good quality) |
| Kadesjo, 2019 (17)      | x | x | x | x | x | x | x | x | 8 (good quality) |
| Lambrecht, 2018 (18)    | x | x | x | x | x | x | x | x | 8 (good quality) |
| Landes, 2016 (19)       | x | x | x | x | x | x | x | x | 8 (good quality) |
| Lopez-Cuenca, 2016 (20) | x | x | x | x | x | x | x | x | 8 (good quality) |
| Meigher, 2016 (21)      | x | x | x | x | x | x | x | x | 8 (good quality) |
| Nestelberger, 2017 (22) | x | x | x | x | x | x | x | x | 8 (good quality) |
| Neumann, 2017 (23)      | x | x | x | x | x | x | x | x | 8 (good quality) |
| Paiva, 2015 (24)        | x | x | x | x | x | x | x | x | 8 (good quality) |
| Pandey, 2020 (25)       | 0 | 0 | x | 0 | x | 0 | 0 | 0 | 2 (poor quality) |
| Putot, 2018 (26)        | x | x | x | x | x | x | x | x | 8 (good quality) |
| Putot, 2019 (27)        | x | x | x | x | x | 0 | x | x | 7 (good quality) |
| Putot, 2020 (28)        | x | x | x | x | x | x | x | x | 8 (good quality) |
| Radovanovic, 2017 (29)  | x | x | x | x | x | x | x | x | 8 (good quality) |

|                      |   |   |   |   |   |   |   |   |                  |
|----------------------|---|---|---|---|---|---|---|---|------------------|
| Raphael, 2020 (30)   | x | x | x | x | x | x | x | x | 8 (good quality) |
| Reed, 2017 (31)      | x | x | x | x | x | x | x | x | 8 (good quality) |
| Saaby 2013 (32)      | x | x | x | x | x | x | x | x | 8 (good quality) |
| Saaby, 2014 (33)     | x | x | x | x | x | x | x | x | 8 (good quality) |
| Sandoval, 2014 (34)  | x | x | x | x | x | x | x | x | 8 (good quality) |
| Sandoval, 2017 (35)  | x | x | x | x | x | x | x | x | 8 (good quality) |
| Sato, 2020 (36)      | 0 | 0 | 0 | x | 0 | 0 | x | x | 2 (poor quality) |
| Shah, 2015 (37)      | x | x | x | x | x | x | x | x | 8 (good quality) |
| Singh, 2020 (38)     | 0 | 0 | x | x | x | x | x | x | 6 (fair quality) |
| Smilowitz, 2018 (39) | x | x | 0 | x | x | x | x | x | 7 (good quality) |
| Stein, 2014 (40)     | x | x | 0 | x | x | x | x | x | 7 (good quality) |
| Truong, 2020 (41)    | x | x | x | x | x | x | x | x | 8 (good quality) |

Table S6. Precipitating conditions for T2MI.

| Precipitating Factor                  | Events | Patients | %     |
|---------------------------------------|--------|----------|-------|
| Sepsis                                | 1116   | 3110     | 35.9% |
| Arrhythmia                            | 2047   | 6868     | 29.8% |
| Heart failure                         | 958    | 3346     | 28.6% |
| Valvular abnormality                  | 351    | 1301     | 27.0% |
| Anaemia                               | 1692   | 6281     | 26.9% |
| Respiratory failure                   | 762    | 4424     | 17.2% |
| Non-cardiac surgery                   | 103    | 841      | 12.2% |
| Infection                             | 361    | 3412     | 10.6% |
| Shock/hypotension                     | 291    | 3006     | 9.7%  |
| Hypertension                          | 321    | 3620     | 8.9%  |
| Pulmonary oedema                      | 33     | 380      | 8.7%  |
| Chronic obstructive pulmonary disease | 137    | 1661     | 8.2%  |
| Bradycardia                           | 35     | 484      | 7.2%  |
| Renal failure                         | 133    | 1956     | 6.8%  |
| Stroke                                | 68     | 1731     | 3.9%  |
| Coronary spasm                        | 36     | 1048     | 3.4%  |
| Bleeding                              | 53     | 1834     | 2.9%  |
| Coronary endothelial dysfunction      | 1      | 592      | 0.2%  |

Table S7. Clinical features on presentation in patients with T2MI versus T1MI patients.

| Presenting Symptom         | T2MI                                 |                          |       | T1MI                                 |                          |       | Odds ratio *<br>[95% CI] |
|----------------------------|--------------------------------------|--------------------------|-------|--------------------------------------|--------------------------|-------|--------------------------|
|                            | No. patients with presenting symptom | Total number of patients | %     | No. patients with presenting symptom | Total number of patients | %     |                          |
| Chest pain                 | 4344                                 | 7335                     | 59.2% | 73103                                | 83371                    | 87.7% | 0.19 [0.15, 0.26]        |
| Dyspnoea                   | 1681                                 | 6080                     | 27.6% | 8154                                 | 82617                    | 9.9%  | 2.83 [1.96, 4.08]        |
| Arm or shoulder discomfort | 28                                   | 330                      | 8.5%  | 50                                   | 143                      | 35.0% | 0.18 [0.11, 0.30]        |
| Jaw or neck discomfort     | 6                                    | 140                      | 4.3%  | 12                                   | 77                       | 15.6% | 0.24 [0.09, 0.68]        |
| Epigastric discomfort      | 8                                    | 140                      | 5.7%  | 8                                    | 77                       | 10.4% | 0.52 [0.19, 1.45]        |
| Nausea or vomiting         | 46                                   | 330                      | 13.9% | 39                                   | 143                      | 27.3% | 0.46 [0.28, 0.74]        |
| Fatigue                    | 5                                    | 140                      | 3.6%  | 5                                    | 77                       | 6.5%  | 0.53 [0.15, 1.90]        |
| Diaphoresis                | 16                                   | 140                      | 11.4% | 16                                   | 77                       | 20.8% | 0.49 [0.23, 1.05]        |
| Other nonspecific symptoms | 1252                                 | 2932                     | 42.7% | 4096                                 | 58884                    | 7.0%  | 4.19 [0.72, 24.39]       |
| Collapse / syncope         | 99                                   | 2125                     | 4.7%  | 157                                  | 7152                     | 2.2%  | 2.10 [1.05, 4.18]        |

\*Comparing T2MI with T1MI patients, with odds ratio adjusted according to study weighting using random effects meta-analysis

Abbreviations: URL- upper reference limit; STEMI- ST elevation myocardial infarction; NSTEMI- Non- ST elevation myocardial infarction; MI- Myocardial infarction; cTn- cardiac troponin; T1MI- Type 1 myocardial infarction; T2MI- Type 2 myocardial infarction; ECG- electrocardiogram; CAD- coronary artery disease; PCI- percutaneous coronary intervention; CABG- coronary artery bypass graft; IHD- ischaemic heart disease; MACE- Major adverse cardiovascular events; CI- confidence interval



Table S8. Cardiac investigations in patients with T2 MI versus T1MI.

| Variable                                                                                                                                                                                                                                                              | T2MI                                            |                    |       | T1MI                                            |                      |       | Odds ratio*<br>(95% CI) |
|-----------------------------------------------------------------------------------------------------------------------------------------------------------------------------------------------------------------------------------------------------------------------|-------------------------------------------------|--------------------|-------|-------------------------------------------------|----------------------|-------|-------------------------|
|                                                                                                                                                                                                                                                                       | No. patients with nominated diagnostic findings | Total no. patients | %     | No. patients with nominated diagnostic findings | Total no of patients | %     |                         |
| <b>ECG</b>                                                                                                                                                                                                                                                            |                                                 |                    |       |                                                 |                      |       |                         |
| ST elevation                                                                                                                                                                                                                                                          | 1265                                            | 9417               | 13.4% | 42726                                           | 101584               | 42.1% | 0.22 [0.18, 0.28]       |
| ST depression or T wave Inversion                                                                                                                                                                                                                                     | 2174                                            | 6314               | 34.4% | 14938                                           | 68530                | 21.8% | 1.38 [0.94, 2.02]       |
| Pathological Q Waves                                                                                                                                                                                                                                                  | 30                                              | 447                | 6.7%  | 177                                             | 850                  | 20.8% | 0.38 [0.20, 0.71]       |
| Non-specific ST-T wave changes                                                                                                                                                                                                                                        | 146                                             | 592                | 24.7% | 45                                              | 417                  | 10.8% | 2.62 [1.81, 3.79]       |
| Left bundle branch block                                                                                                                                                                                                                                              | 338                                             | 3330               | 10.2% | 3045                                            | 60031                | 5.1%  | 1.72 [1.40, 2.12]       |
| Atrial fibrillation/flutter                                                                                                                                                                                                                                           | 448                                             | 1660               | 27.0% | 1871                                            | 18272                | 10.2% | 3.70 [2.87, 4.77]       |
| <b>Echocardiograph</b>                                                                                                                                                                                                                                                |                                                 |                    |       |                                                 |                      |       |                         |
| Echocardiogram performed                                                                                                                                                                                                                                              | 648                                             | 1353               | 47.9% | 1571                                            | 2830                 | 55.5% | 0.44 [0.20, 0.96]       |
| Presence of RWMA                                                                                                                                                                                                                                                      | 97                                              | 286                | 33.9% | 101                                             | 214                  | 47.2% | 0.48 [0.06, 3.78]       |
| <b>Angiogram</b>                                                                                                                                                                                                                                                      |                                                 |                    |       |                                                 |                      |       |                         |
| Angiogram performed                                                                                                                                                                                                                                                   | 3686                                            | 10721              | 34.4% | 56242                                           | 67432                | 83.4% | 0.09 [0.06, 0.12]       |
| Obstructive coronary artery disease present                                                                                                                                                                                                                           | 1246                                            | 3663               | 34.0% | 19923                                           | 44404                | 44.9% | 0.16 [0.05, 0.54]       |
| Multivessel disease present                                                                                                                                                                                                                                           | 593                                             | 2147               | 27.6% | 11839                                           | 41715                | 28.4% | 0.40 [0.19, 0.82]       |
| *Comparing T2MI with T1MI patients, with odds ratio adjusted according to study weighting using random effects meta-analysis<br>RWMA=regional wall motion abnormalities; CI=confidence interval; T2MI=type 2 myocardial infarction; T1MI=type 1 myocardial infarction |                                                 |                    |       |                                                 |                      |       |                         |

Table S9. Troponin measurements.

| Troponin Measurement | Number of Studies | T1MI (min-max) | T2MI (min-max) |
|----------------------|-------------------|----------------|----------------|
| Baseline cTn (xULN)  | 12                | 0.14-190       | 0.1-8.2        |
| 6h cTn (xULN)        | 4                 | 13.2-142       | 4.25-11        |
| Peak cTn (xULN)      | 21                | 5.1-1703       | 2.8-447        |

Abbreviations: xULN= times upper limit normal

Figure S1. PRISMA flow diagram.

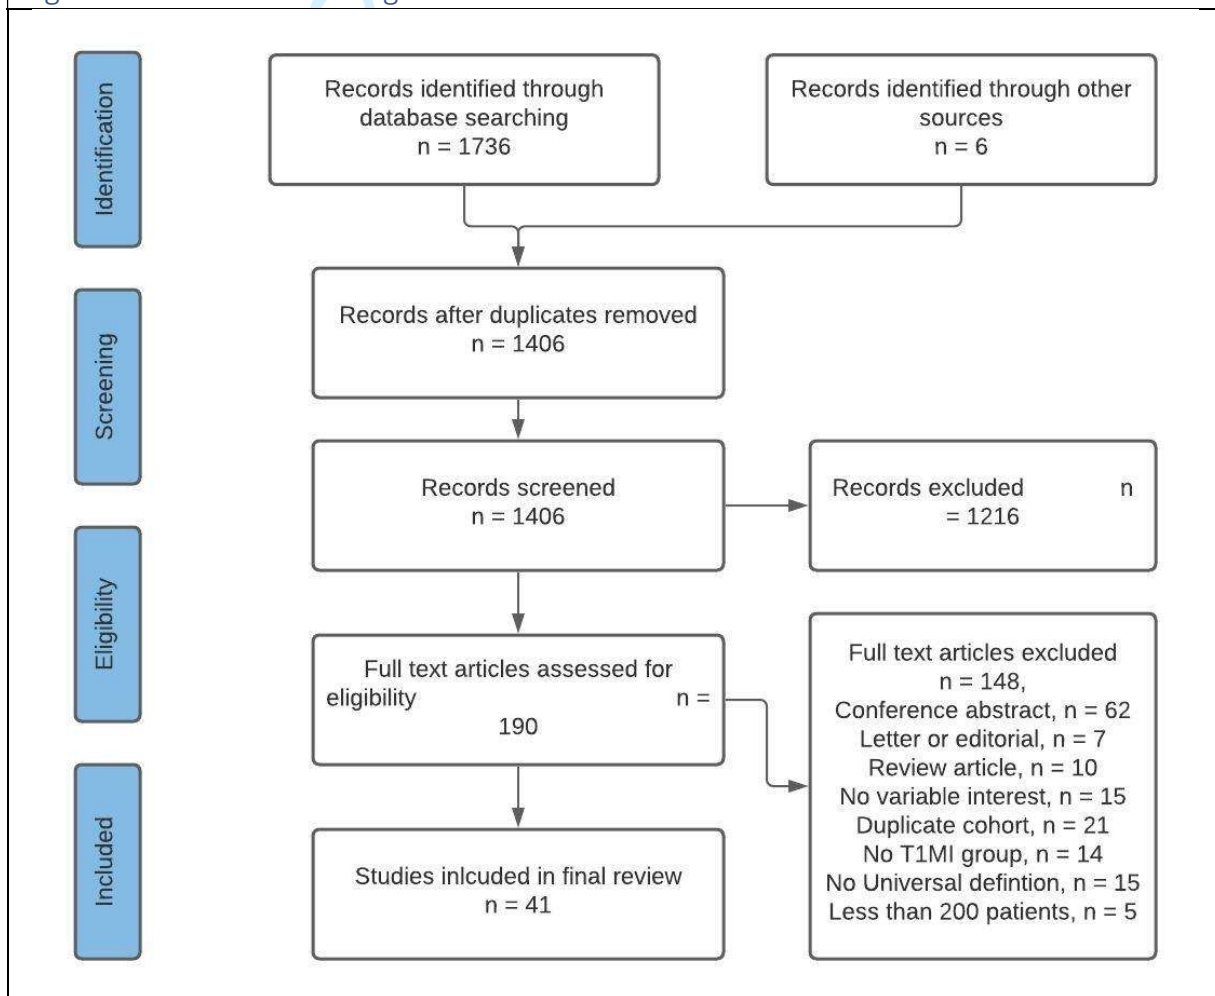

Figure S2. Forest Plot. Ischaemic Heart Disease.

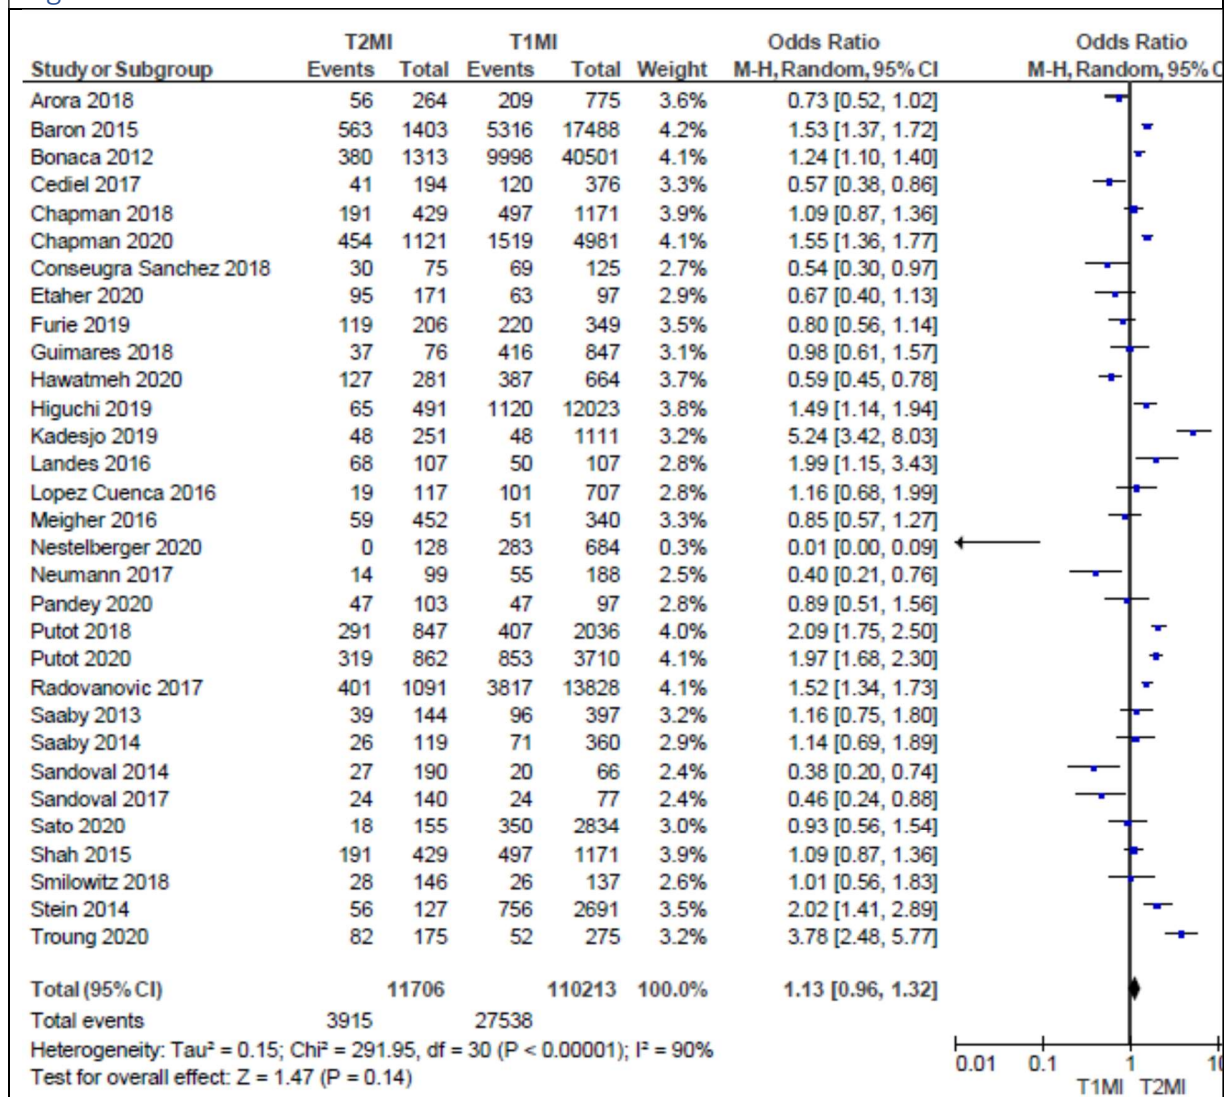

Figure S3. Forest Plot. Type 2 Diabetes Mellitus.

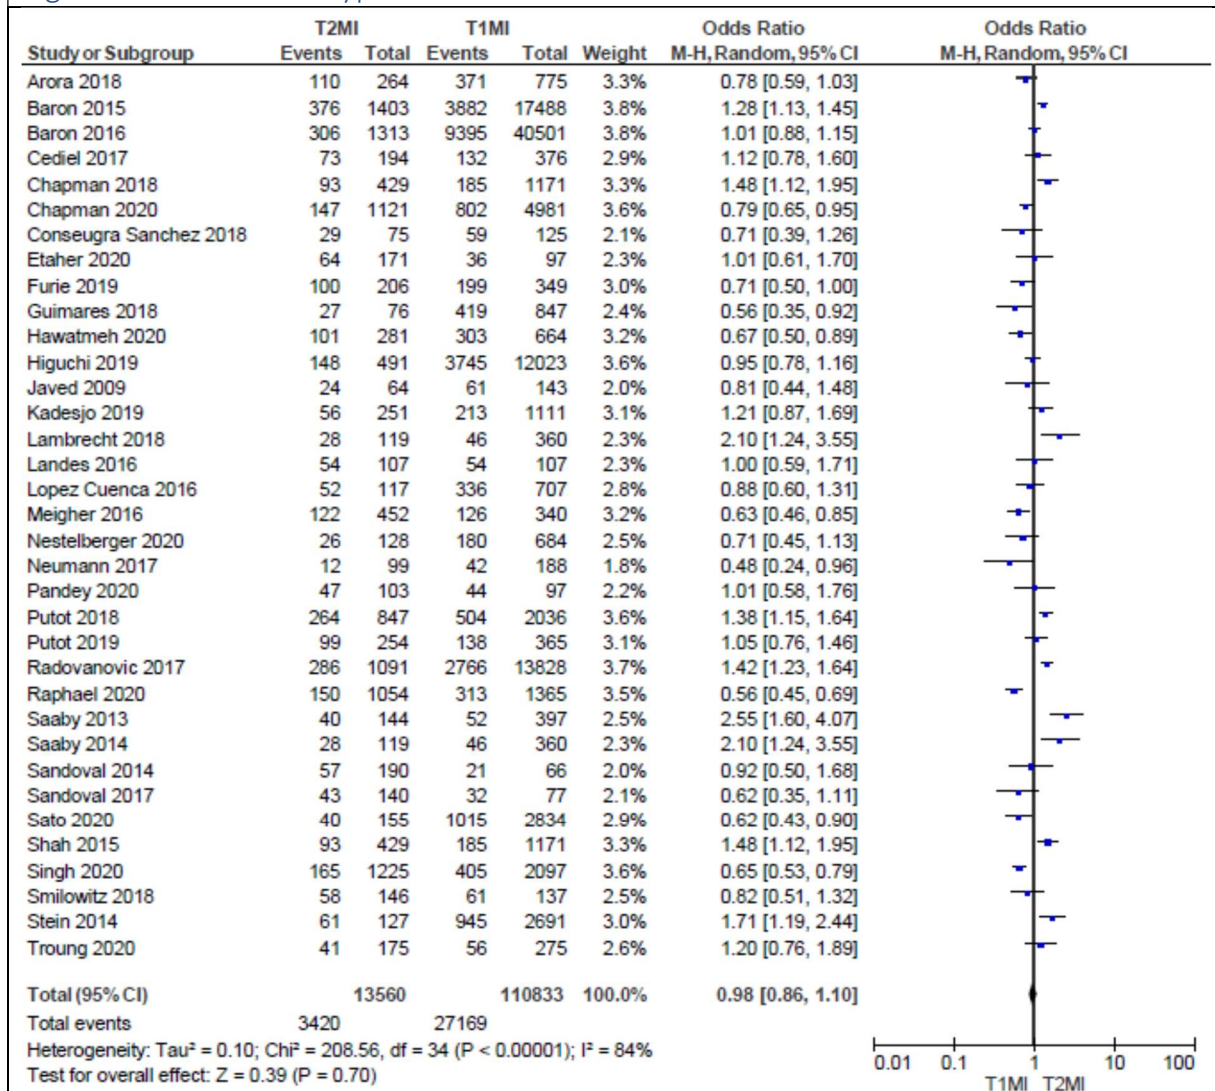

Figure S4. Forest Plot. Hypertension.

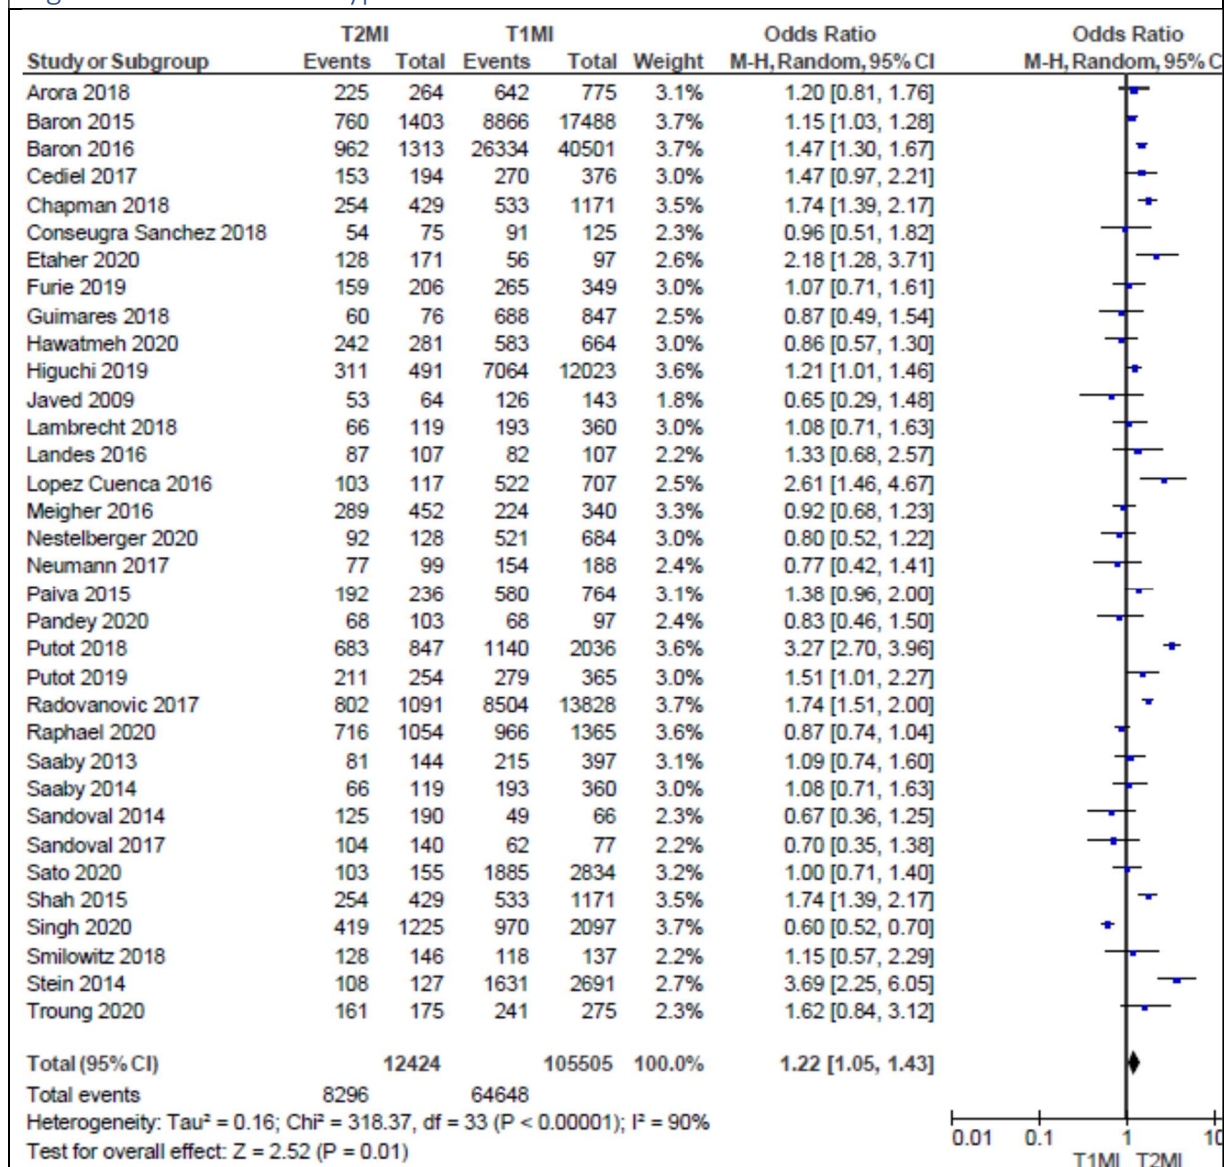

Figure S5. Forest Plot. Dyslipidaemia.

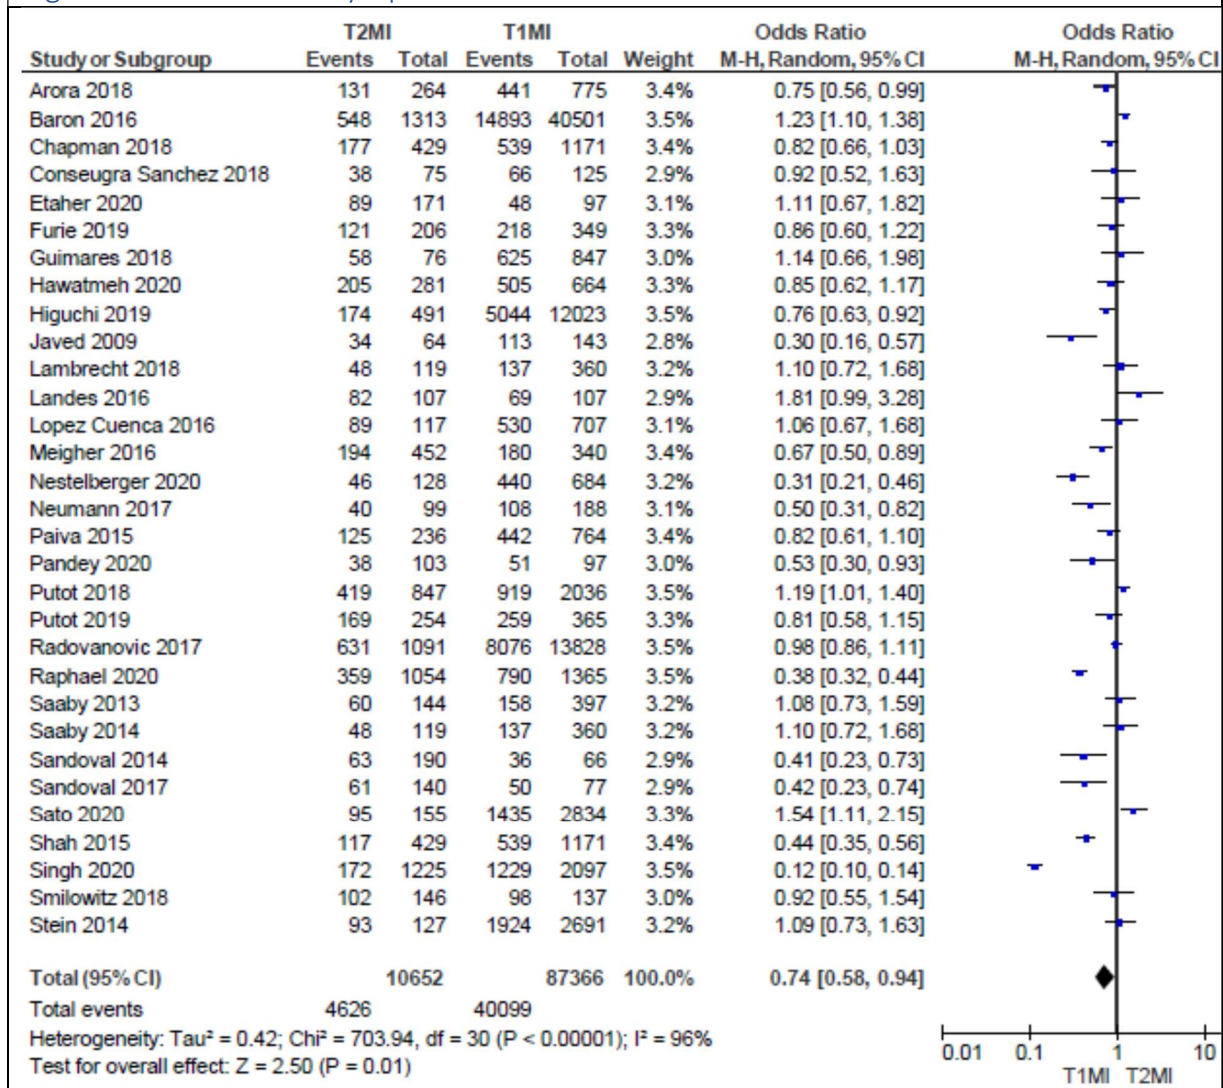

Figure S6. Forest Plot. Smoking.

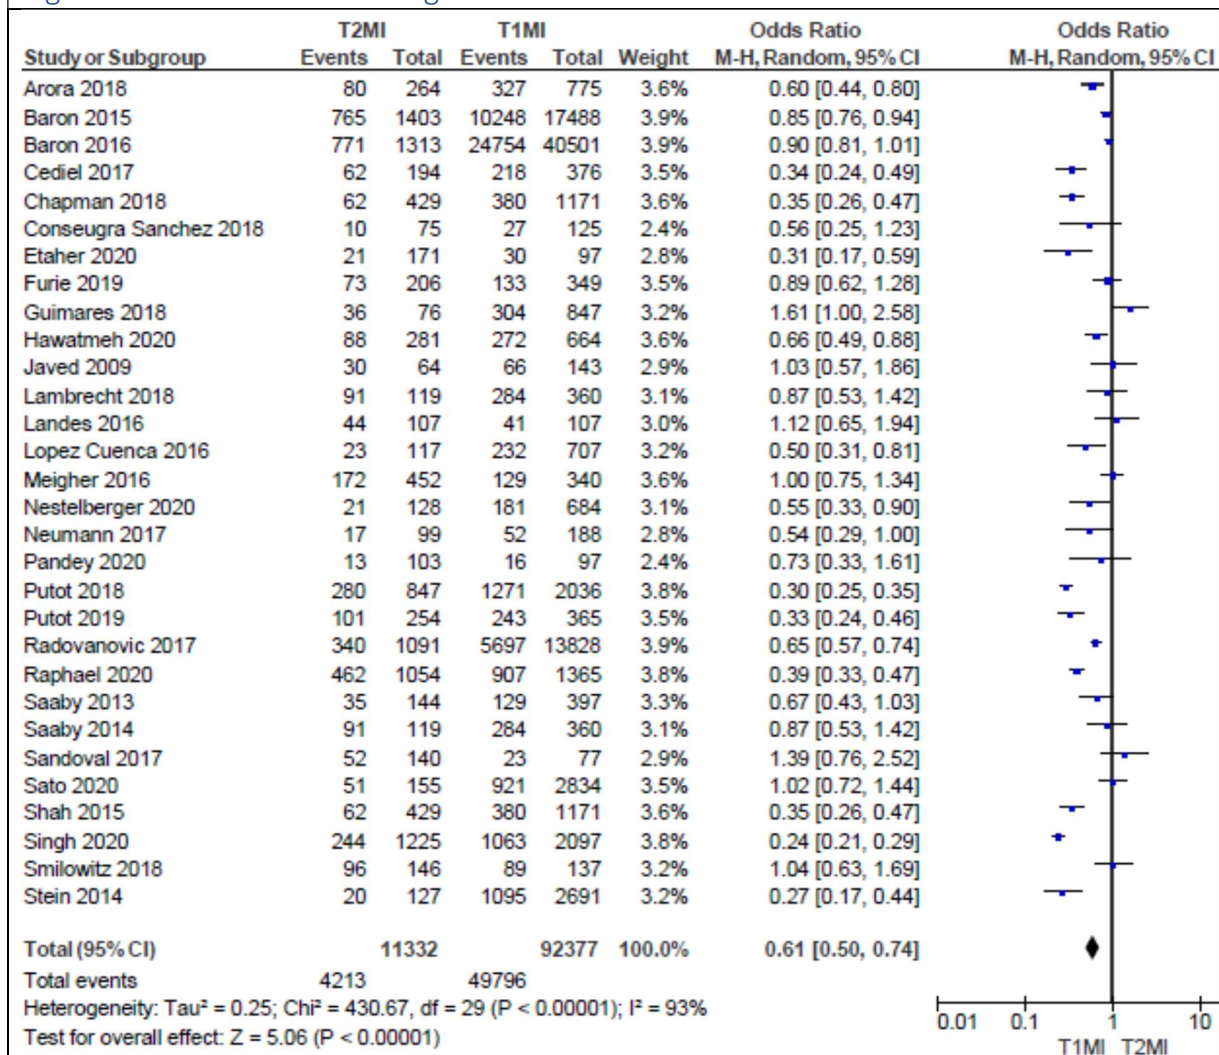

Figure S7. Forest Plot. Obesity.

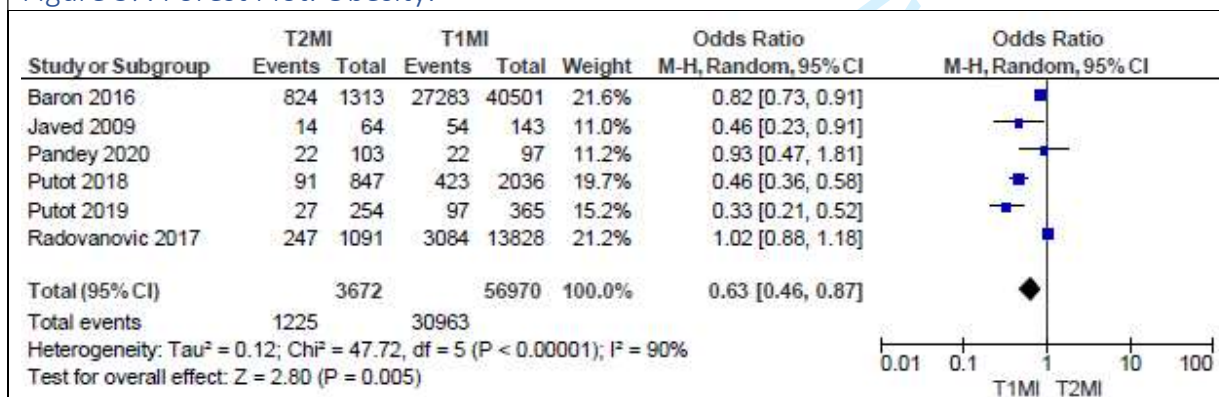

Figure S8. Forest Plot. Chronic Kidney Disease.

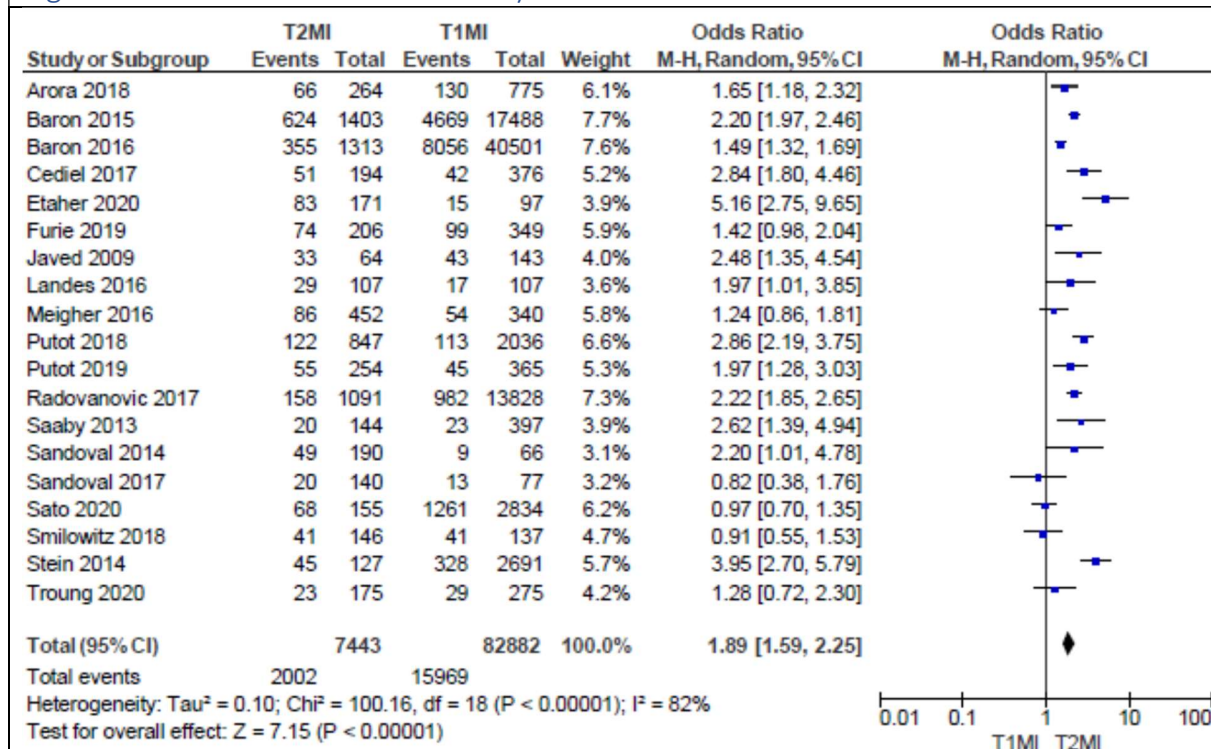



Figure S9. Forest Plot. Heart Failure.

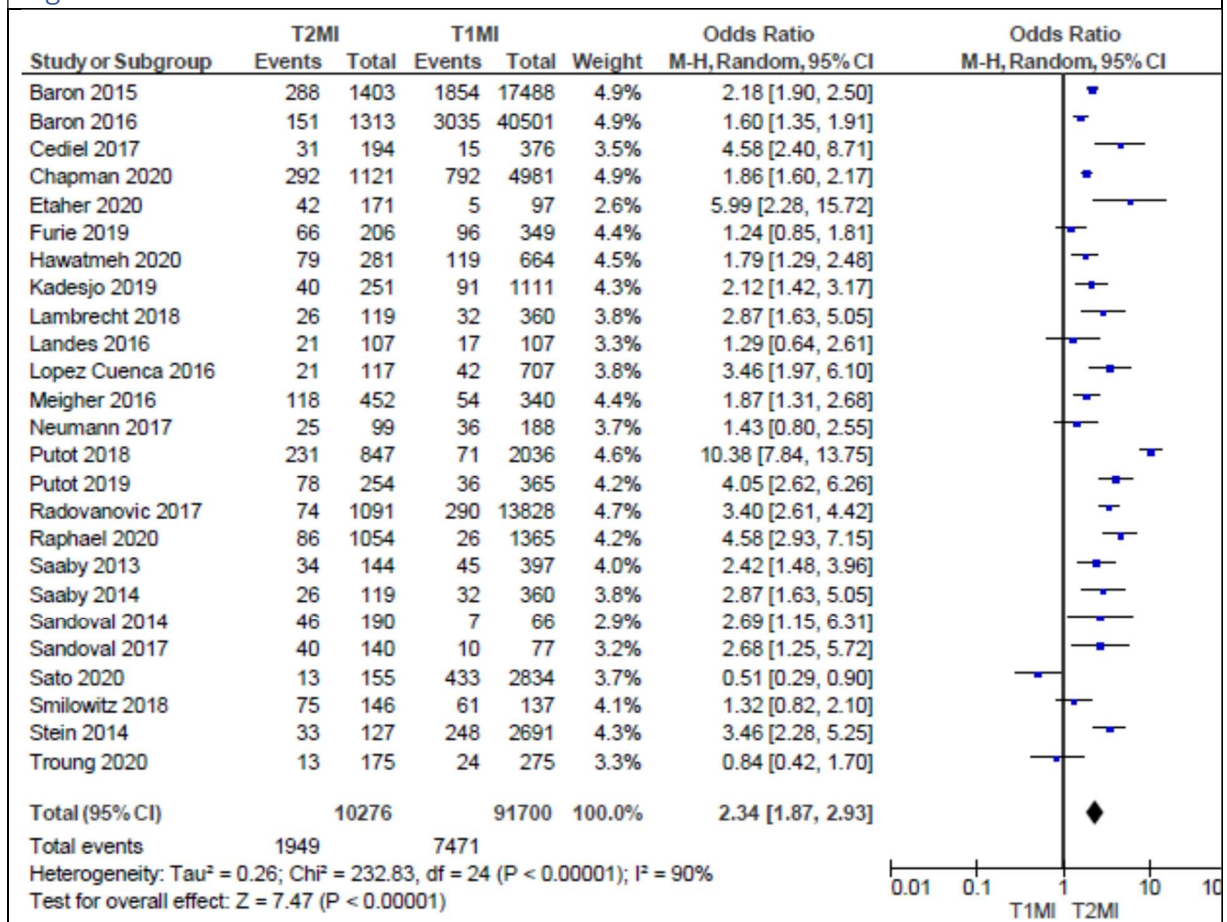

Figure S10. Forest Plot. Peripheral Vascular Disease.

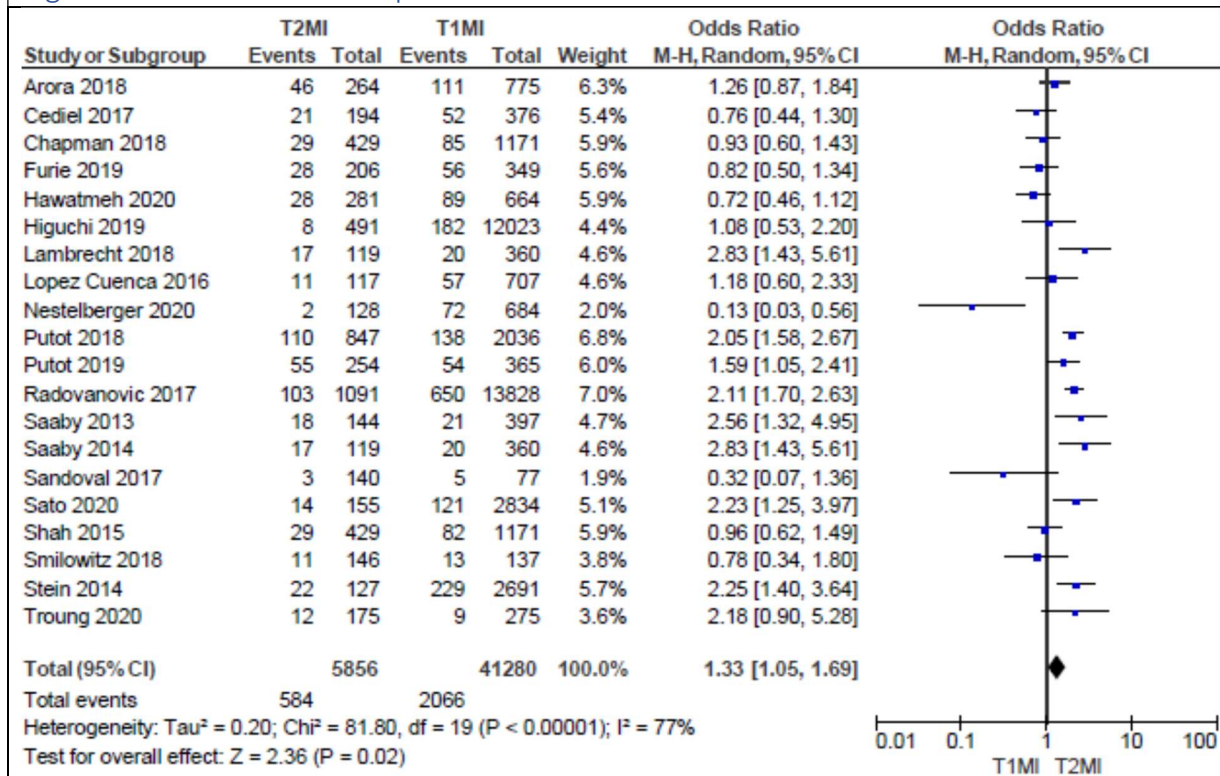

Figure S11. Forest Plot. Cerebrovascular Disease.

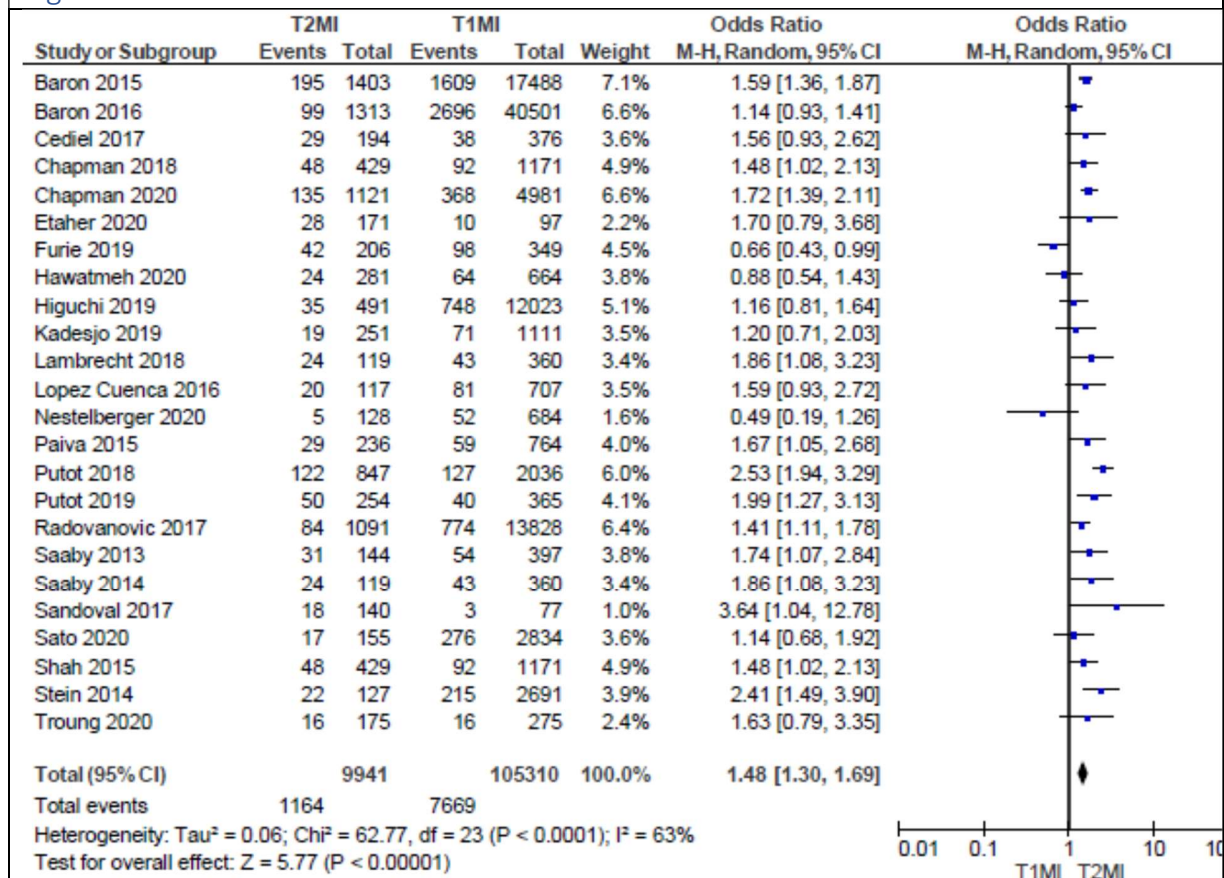

Figure S12. Forest Plot. Illicit Drug Use.

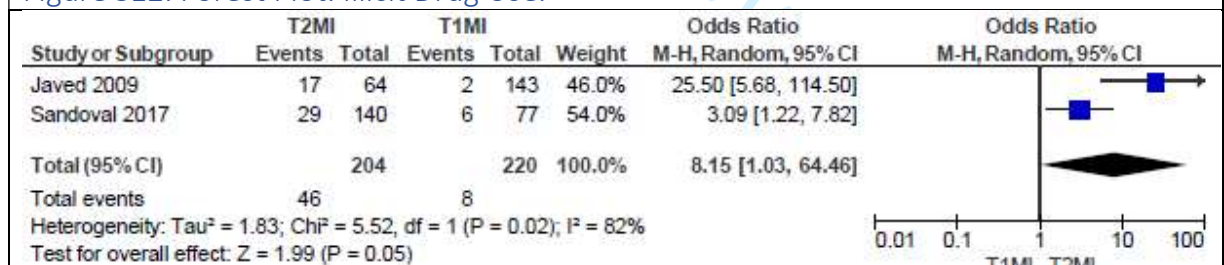

Figure S13. Forest Plot. Atrial Fibrillation.

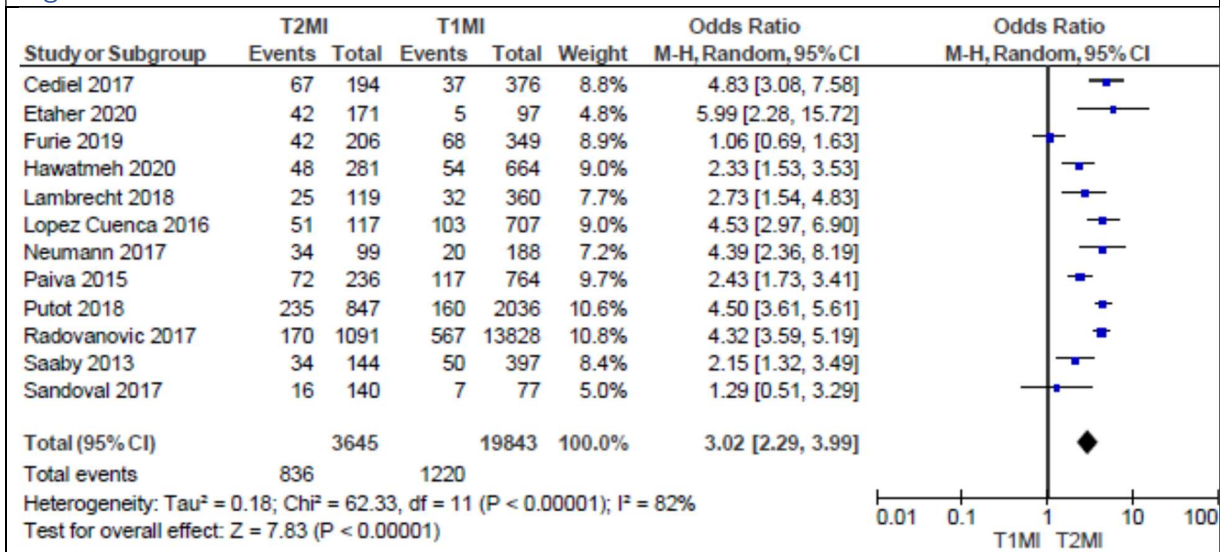

Figure S14. Forest Plot. Chest Pain.

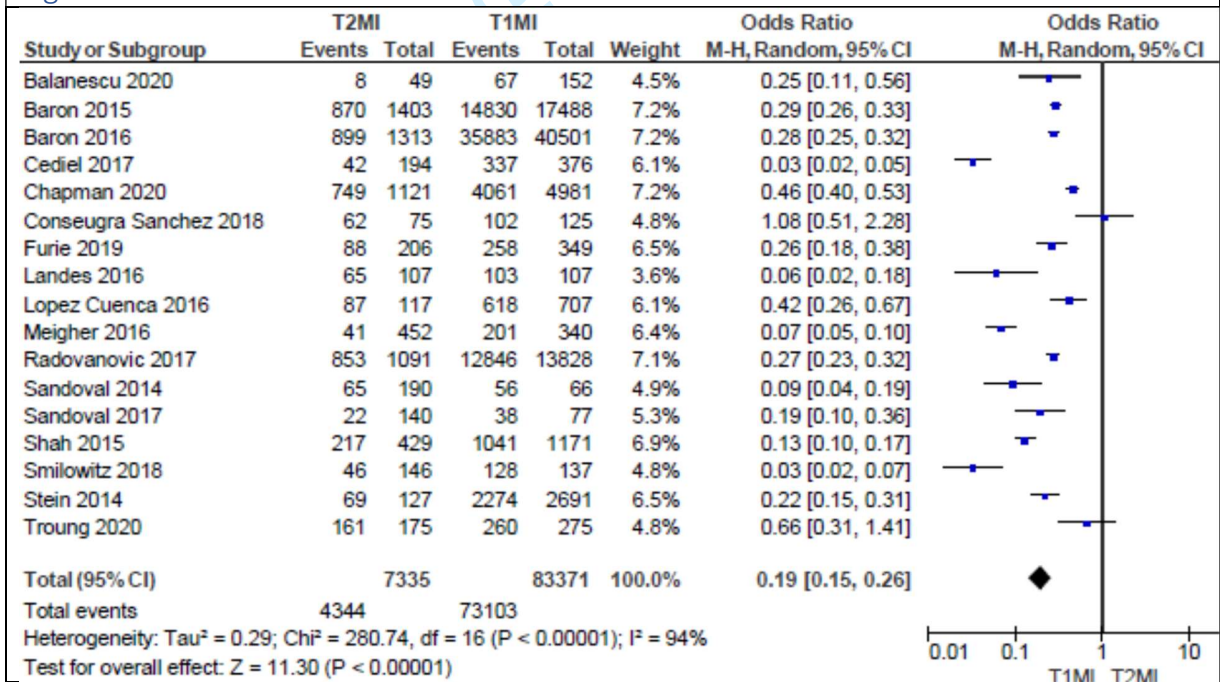

Figure S15. Forest Plot. Dyspnoea.

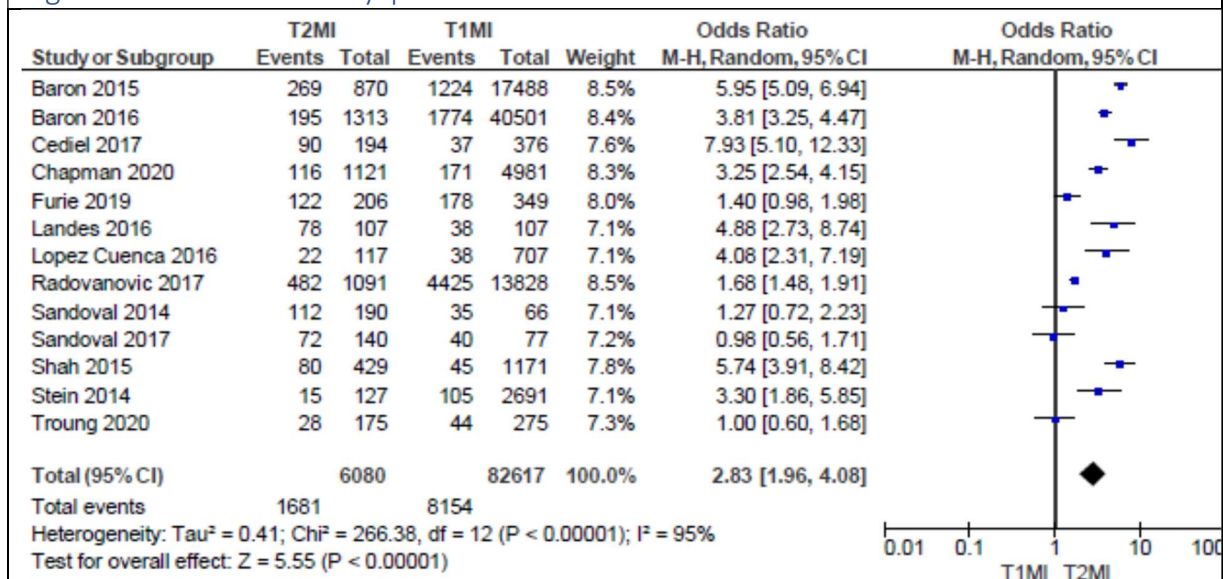

Figure S16. Forest Plot. Arm / Shoulder Discomfort.

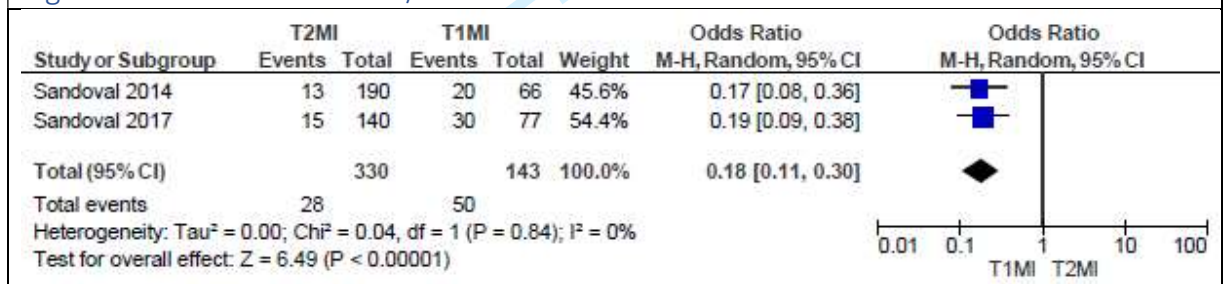

Figure S17. Forest Plot. Jaw / Neck Discomfort.

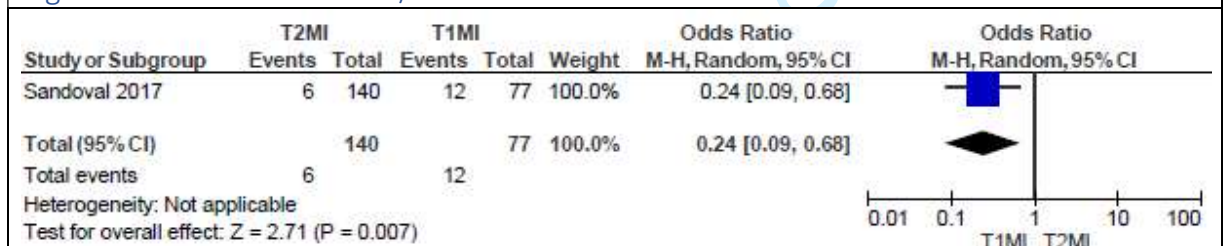

Figure S18. Forest Plot. Epigastric Discomfort.

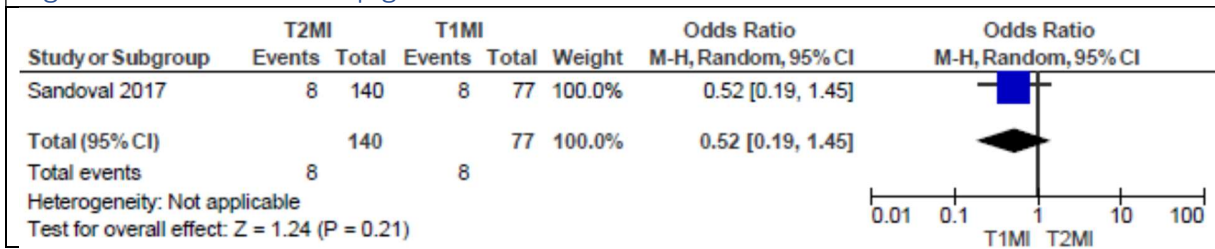

Figure S19. Forest Plot. Nausea / Vomiting.

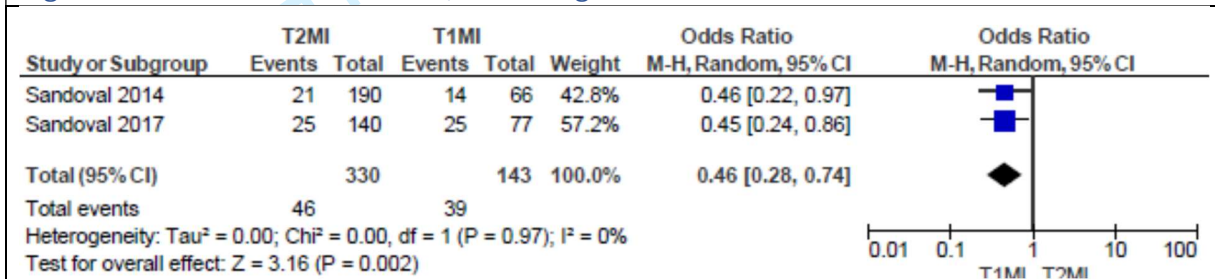

Figure S20. Forest Plot. Fatigue.

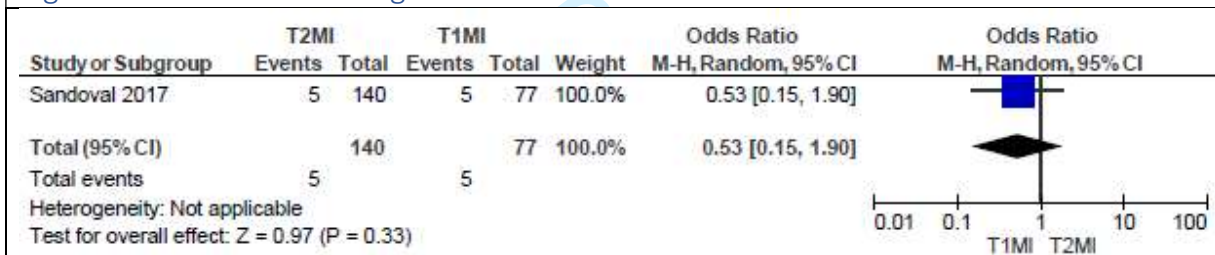

Figure S21. Forest Plot. Diaphoresis.

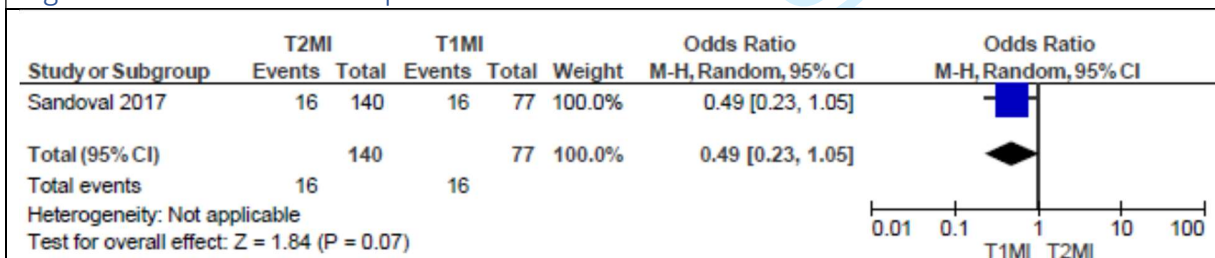

Figure S22. Forest Plot. Non-specific Symptoms.

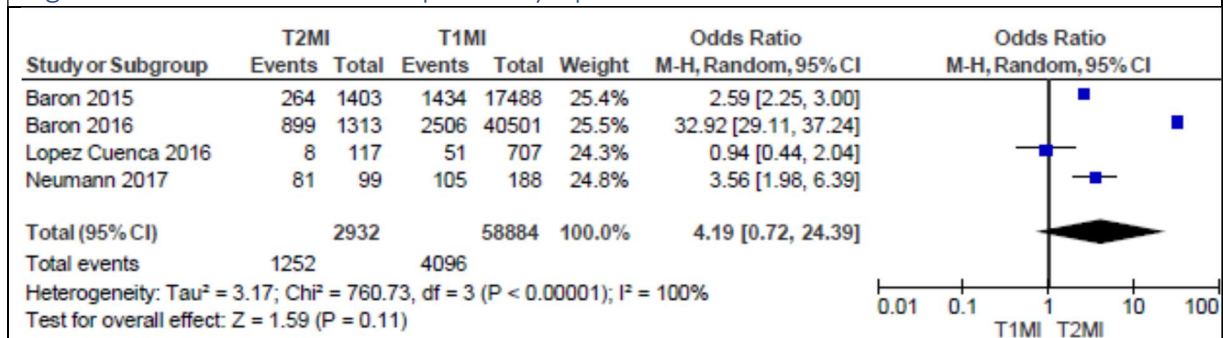

Figure S23. Forest Plot. Collapse / Syncope.

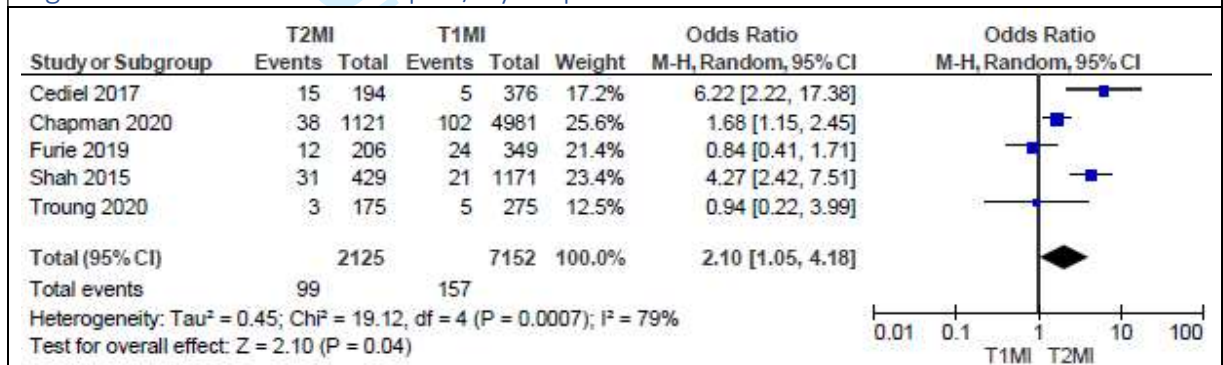

Figure S24. Forest Plot. ST Elevation.

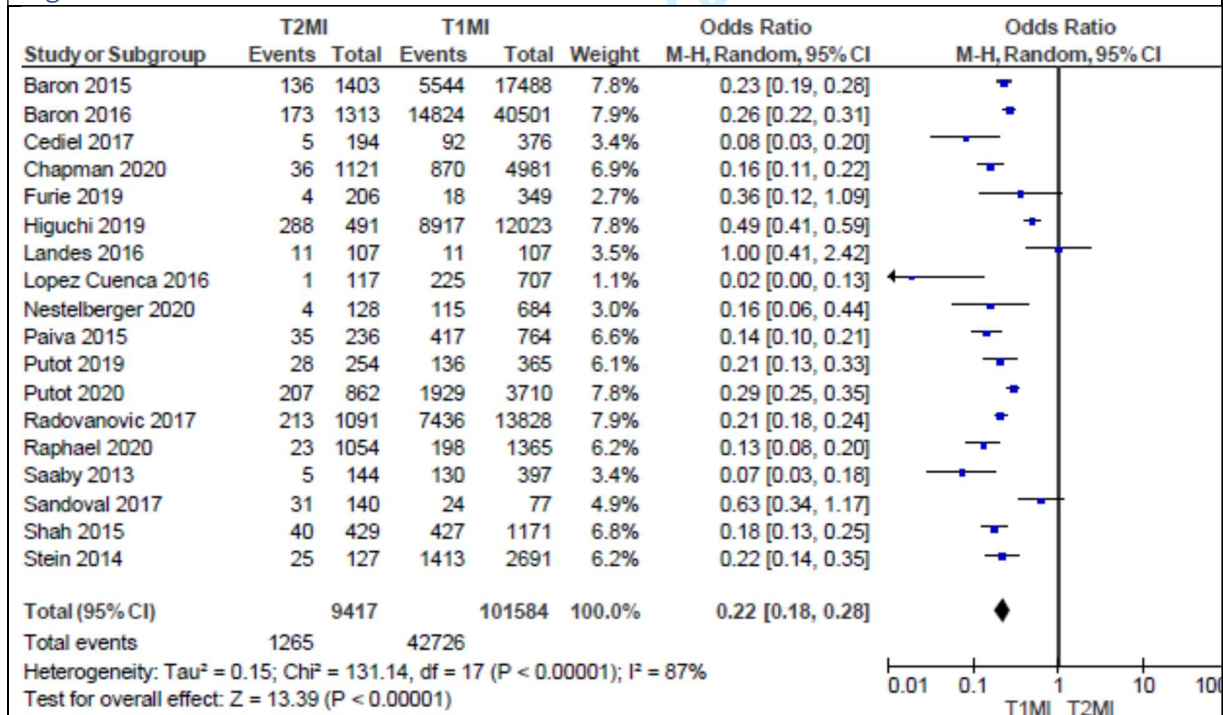

Figure S25. Forest Plot. ST Depression or T Wave Inversion.

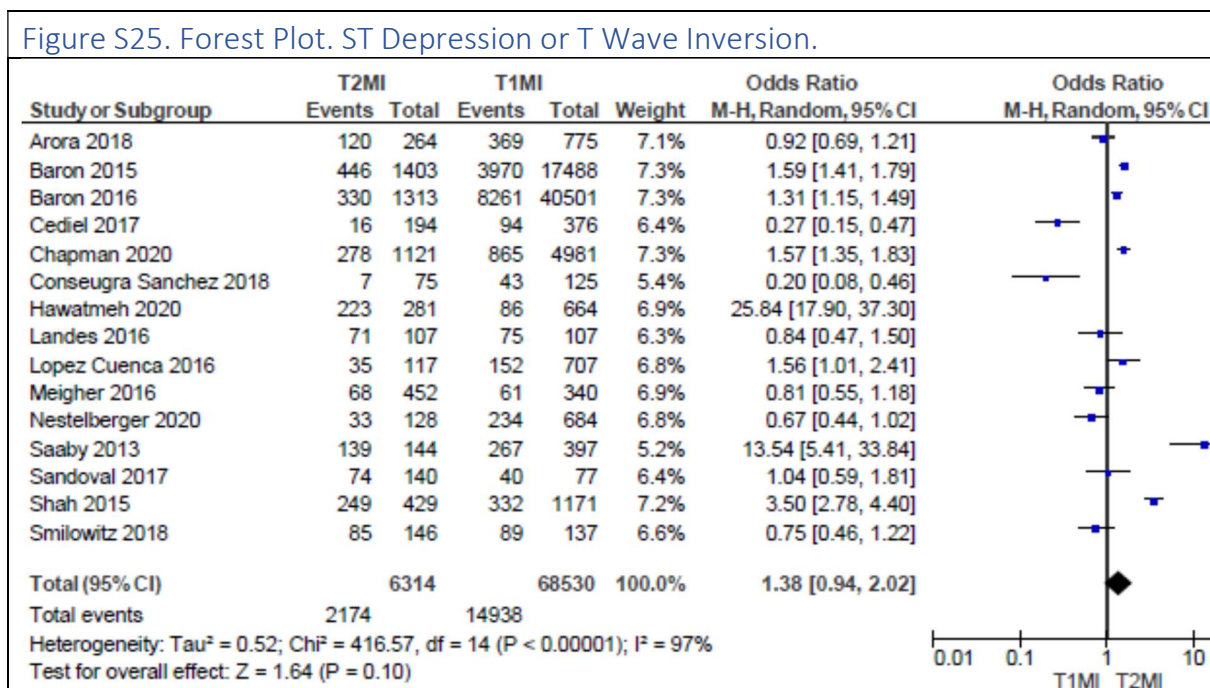

Figure S26. Forest Plot. Q Waves.

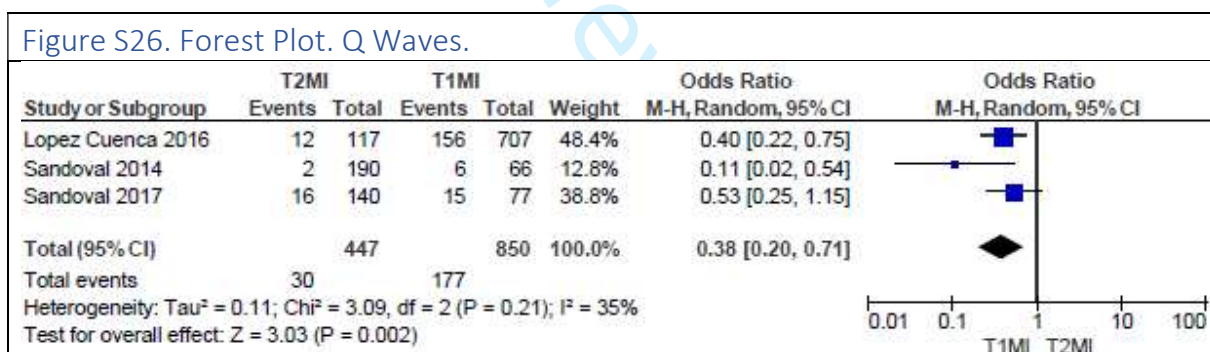

Figure S27. Forest Plot. Non-specific ST Changes.

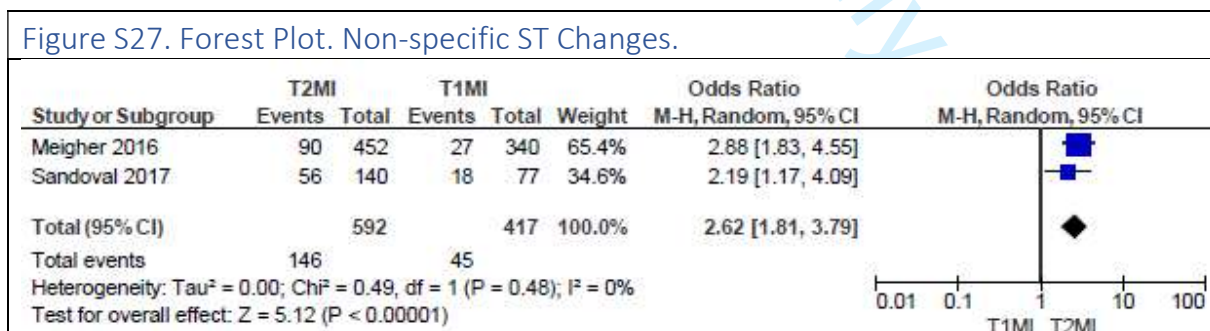



Figure S28. Forest Plot. Left Bundle Branch Block.

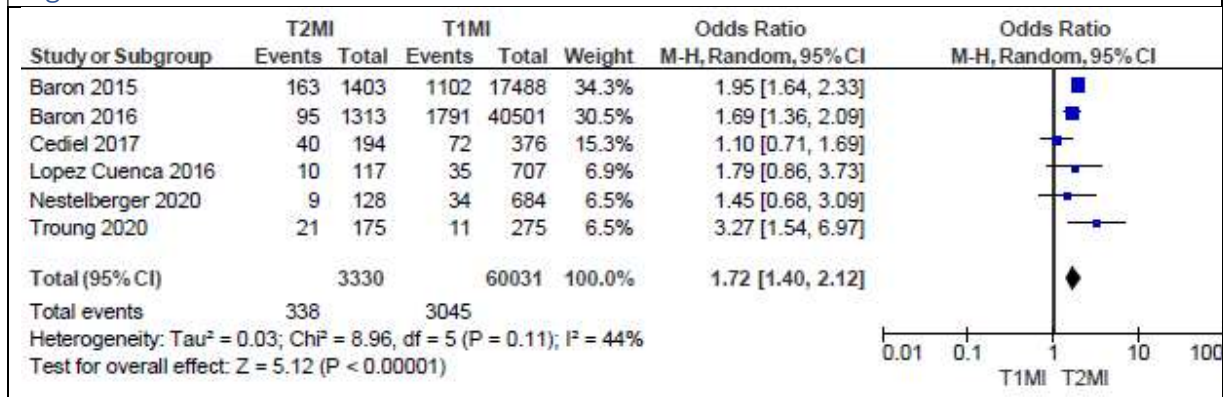

Figure S29. Forest Plot. Atrial Fibrillation.

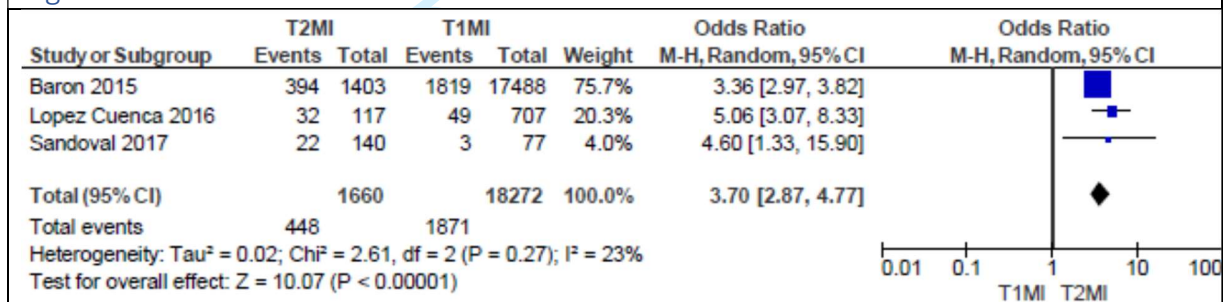

Figure S30. Forest Plot. Angiogram Performed.

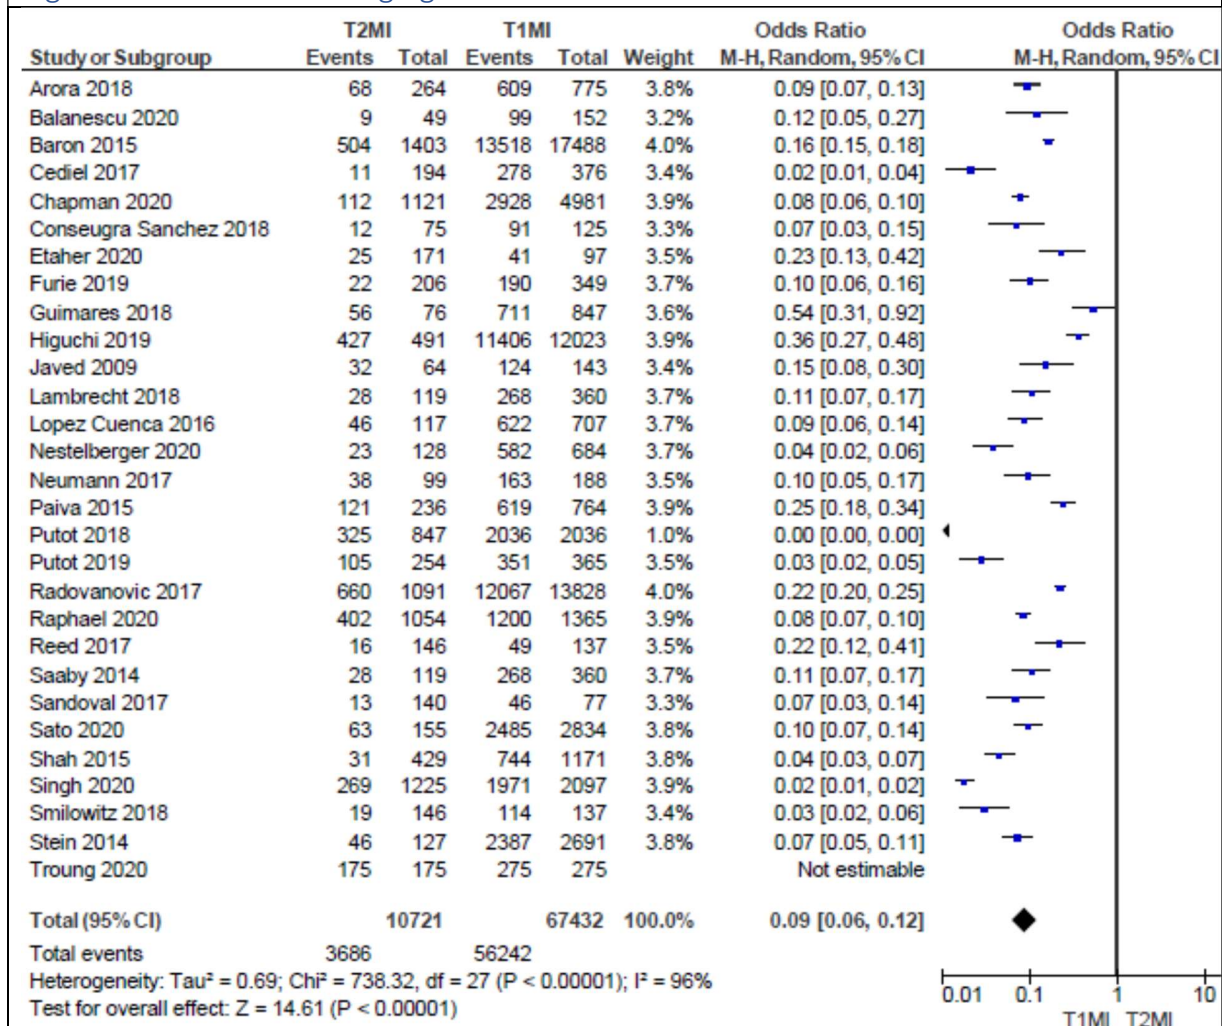

Figure S31. Forest Plot. Obstructive Coronary Artery Disease.

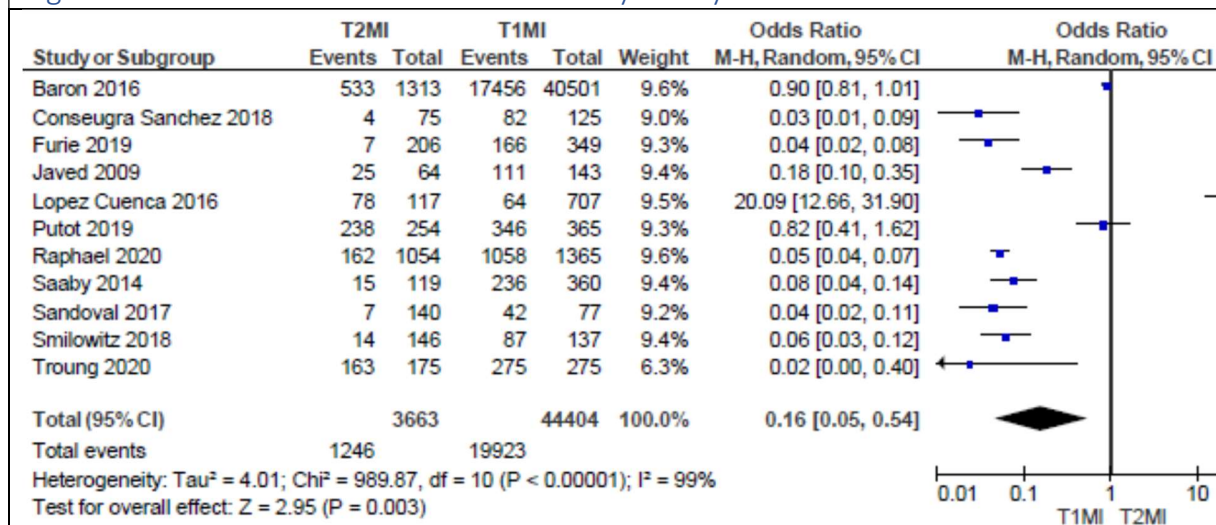

Figure S32. Forest Plot. Multivessel Disease.

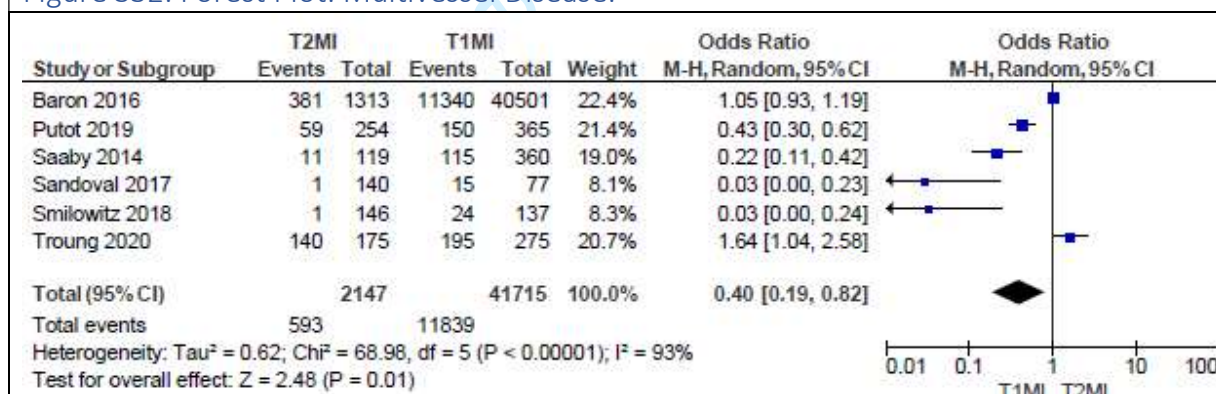

Figure S33. Forest Plot. Echocardiogram Performed.

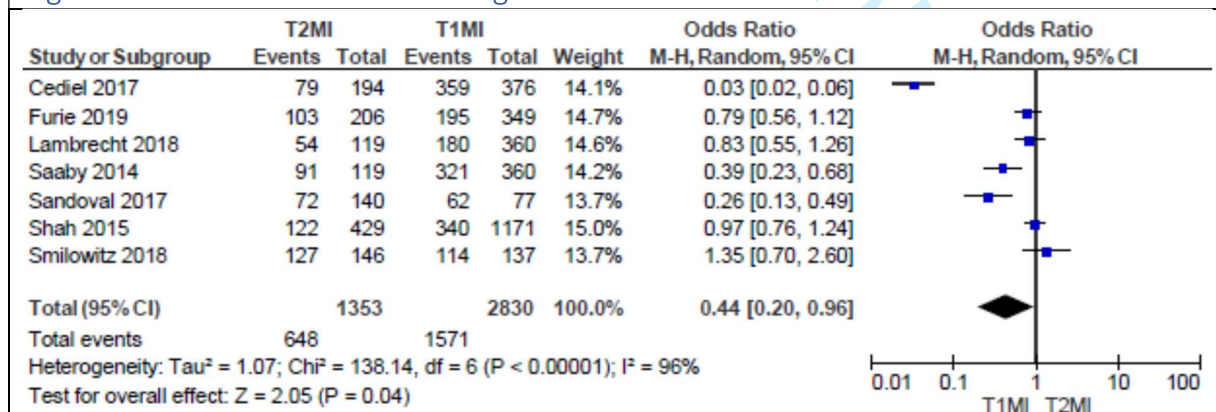

Figure S34. Forest Plot. Regional Wall Motion Abnormalities.

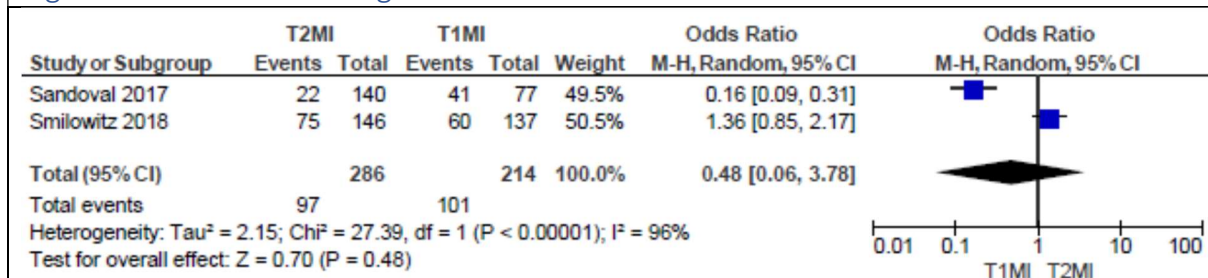

Figure S35. Forest Plot. Beta-Blockers.

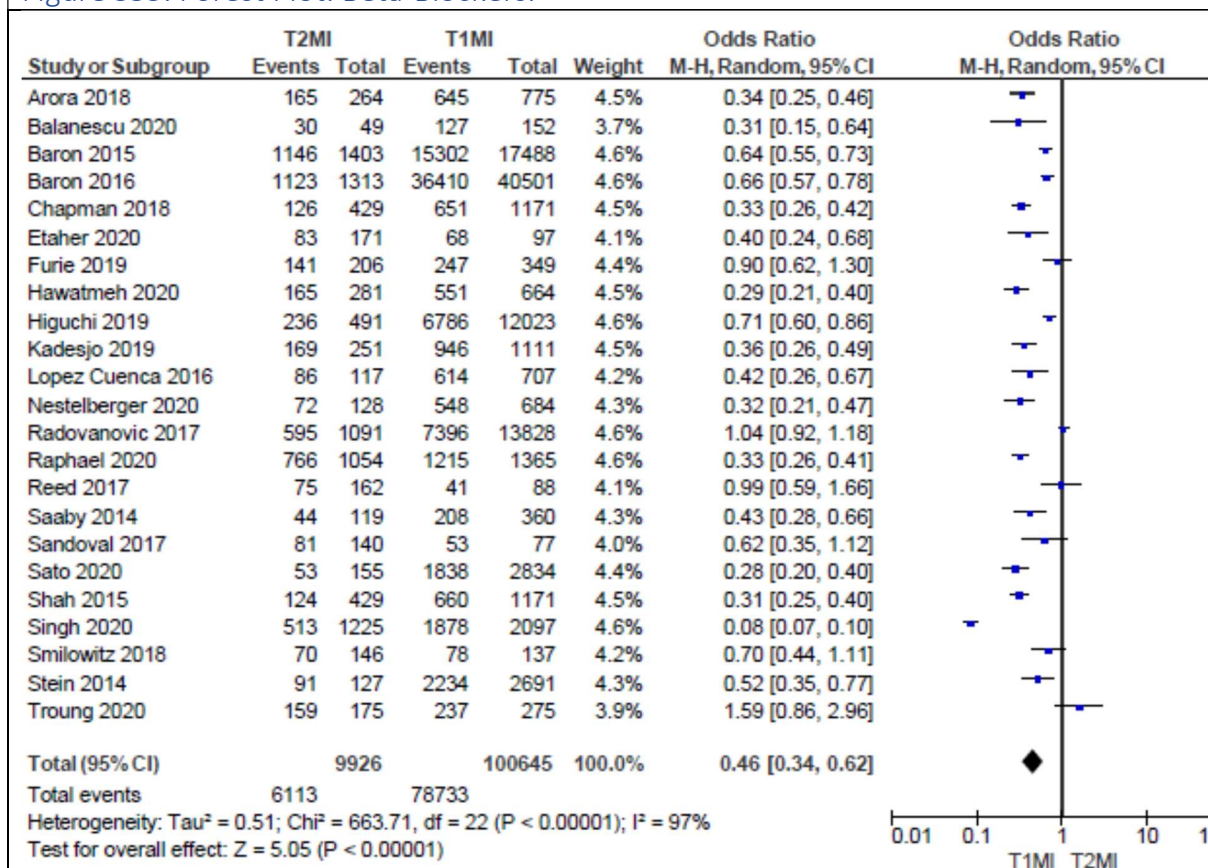

Figure S36. Forest Plot. ACEi/ARB.

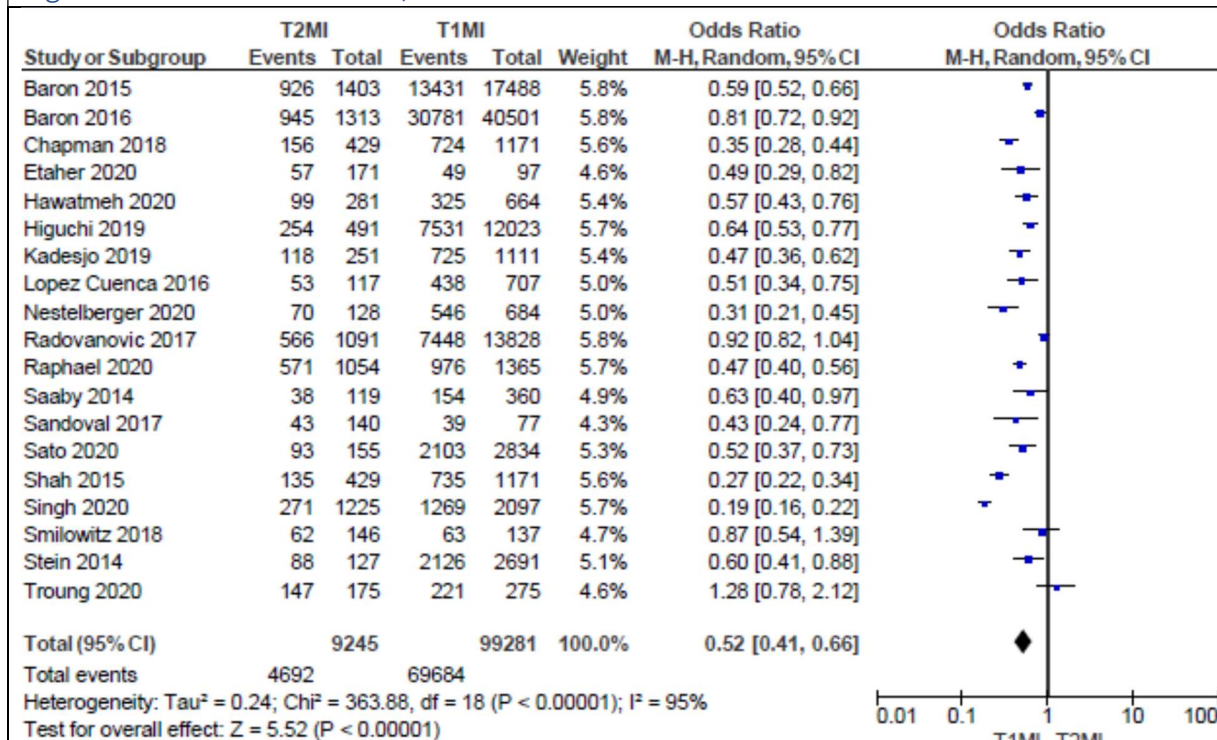

Review only

Figure S37. Forest Plot. Antiplatelets.

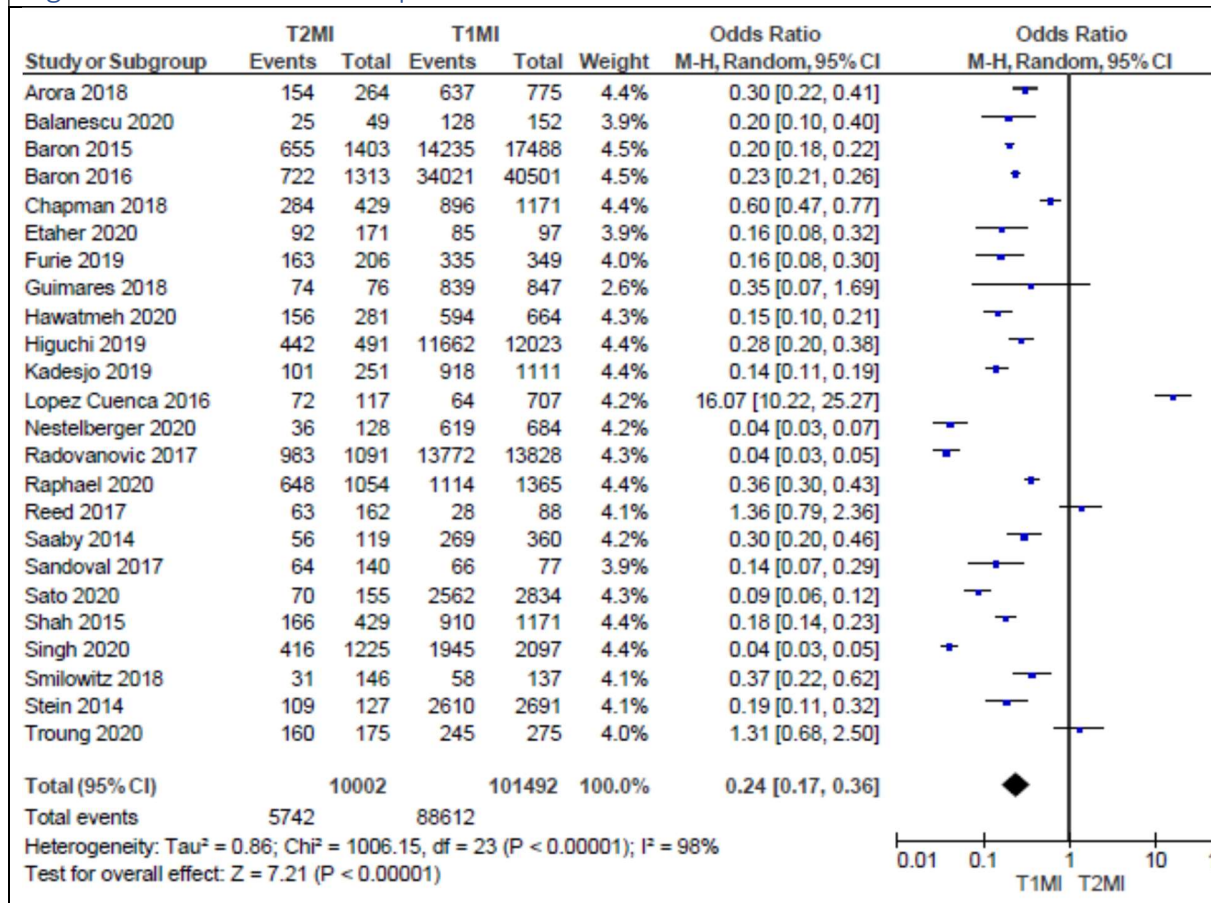

Figure S38. Forest Plot. Anticoagulants.

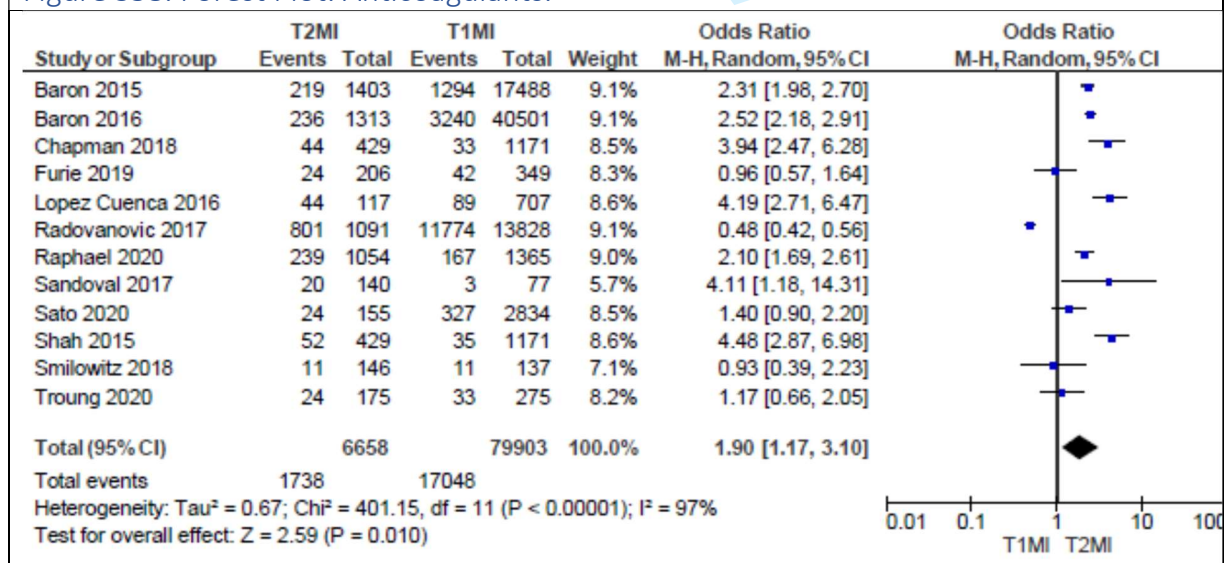

Figure S39. Forest Plot. Antianginals.

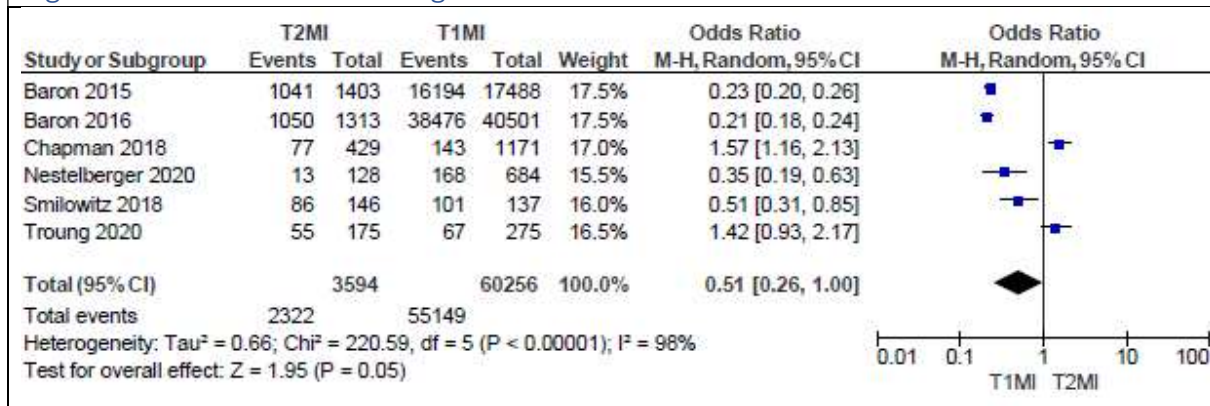

Figure S40. Forest Plot. Diuretics.

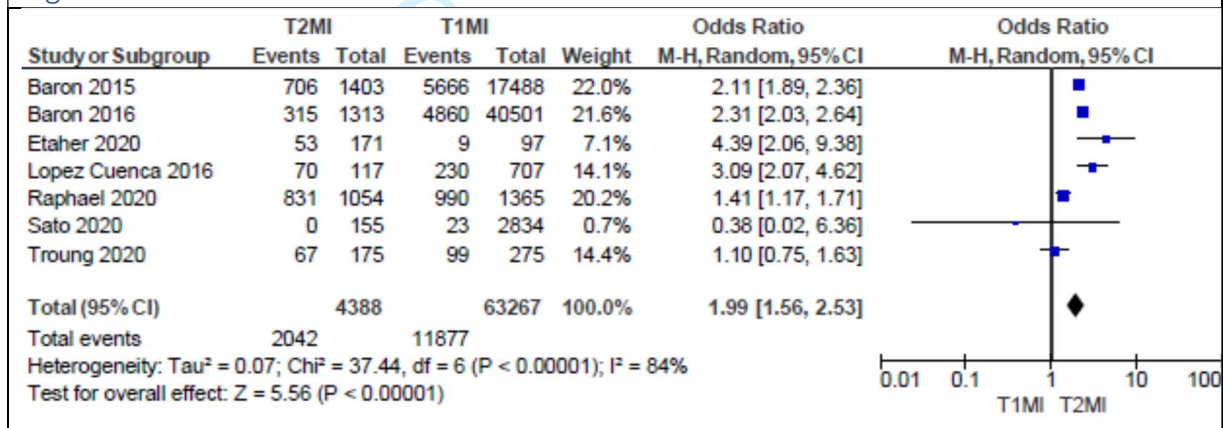

Figure S41. Forest Plot. Statins.

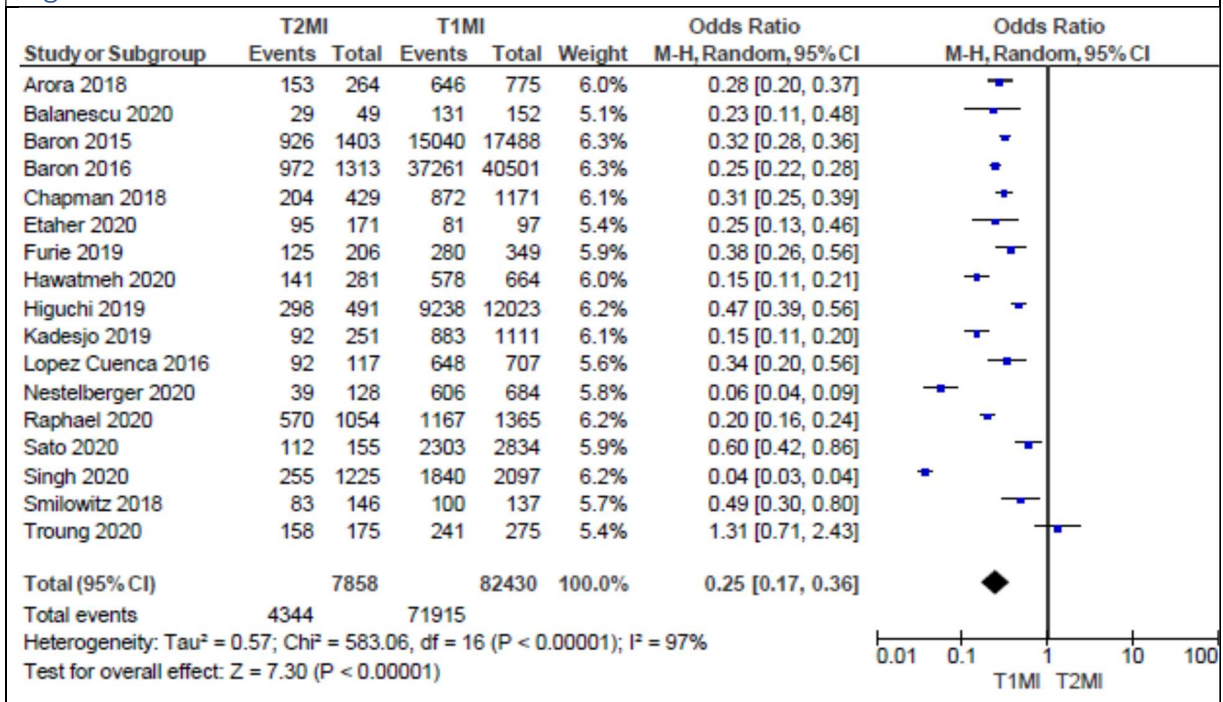

review only



Figure S42. Forest Plot. Percutaneous Coronary Intervention.

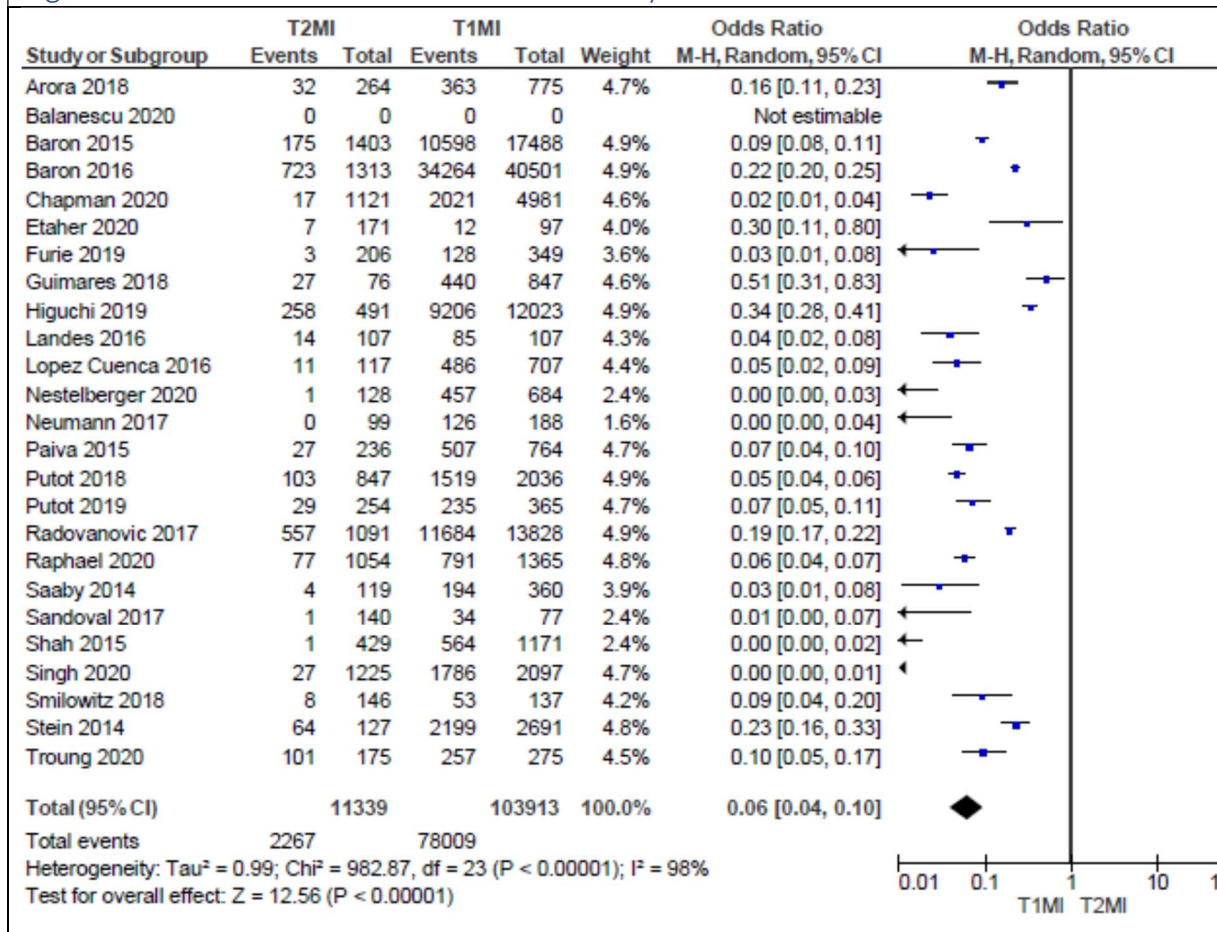

Figure S43. Forest Plot. Coronary Artery Bypass Graft.

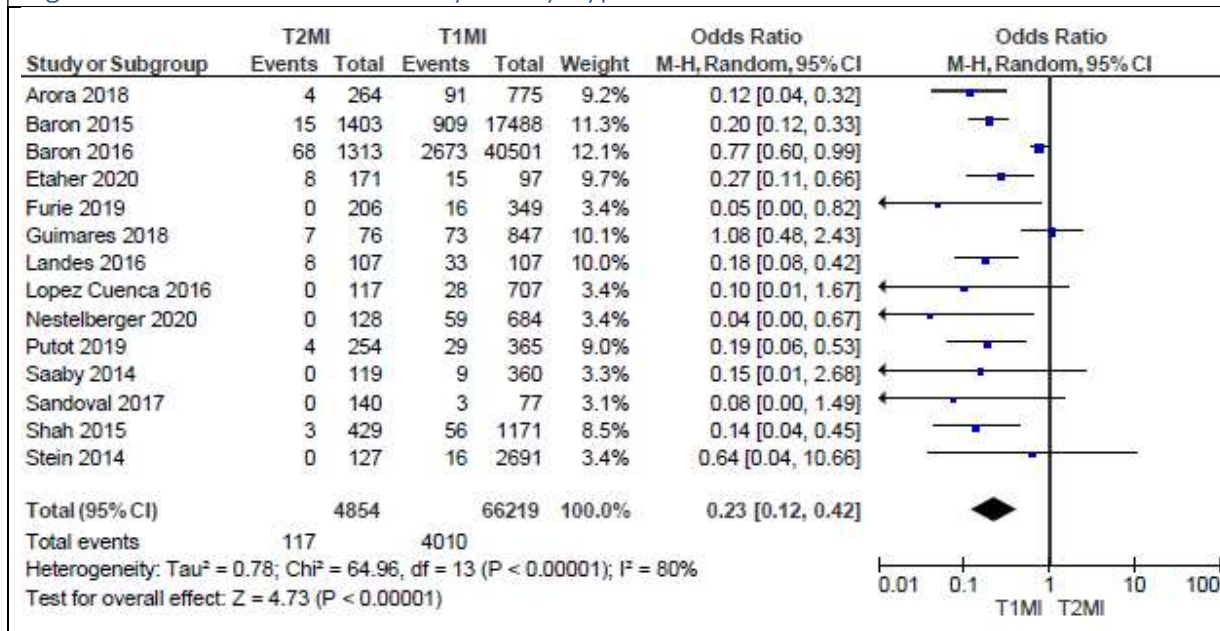

Figure S44. All cause In-hospital mortality. T2MI compared to T1MI.

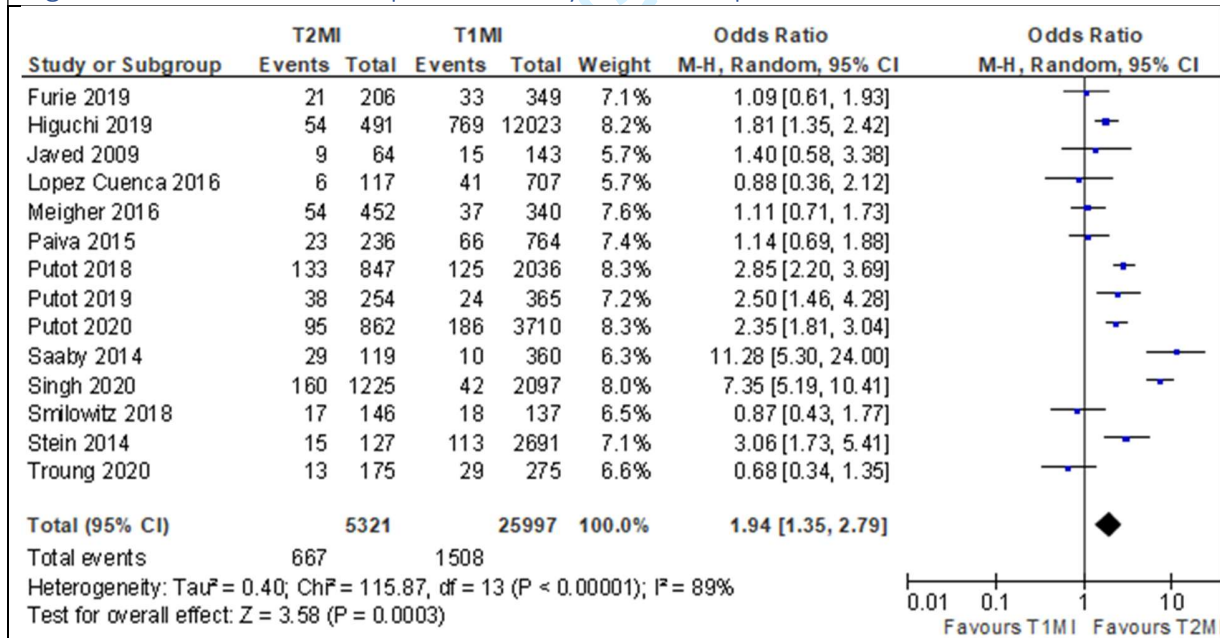

Figure S45. Short-term all-cause mortality. T2MI compared to T1MI.

| Study or Subgroup                                                                                             | T2MI   |            | T1MI   |             | Weight        | Odds Ratio<br>M-H, Random, 95% CI | M-H, R                |
|---------------------------------------------------------------------------------------------------------------|--------|------------|--------|-------------|---------------|-----------------------------------|-----------------------|
|                                                                                                               | Events | Total      | Events | Total       |               |                                   |                       |
| Nestelberger 2020                                                                                             | 1      | 128        | 42     | 684         | 10.4%         | 0.12 [0.02, 0.88]                 |                       |
| Sandoval 2014                                                                                                 | 51     | 190        | 15     | 66          | 29.6%         | 1.25 [0.65, 2.41]                 |                       |
| Sandoval 2017                                                                                                 | 18     | 140        | 6      | 77          | 23.4%         | 1.75 [0.66, 4.60]                 |                       |
| Shah 2015                                                                                                     | 134    | 429        | 187    | 1171        | 36.7%         | 2.39 [1.85, 3.09]                 |                       |
| <b>Total (95% CI)</b>                                                                                         |        | <b>887</b> |        | <b>1998</b> | <b>100.0%</b> | <b>1.34 [0.63, 2.85]</b>          |                       |
| Total events                                                                                                  | 204    |            | 250    |             |               |                                   |                       |
| Heterogeneity: $\text{Tau}^2 = 0.38$ ; $\text{Chi}^2 = 12.11$ , $\text{df} = 3$ ( $P = 0.007$ ); $I^2 = 75\%$ |        |            |        |             |               |                                   | 0.01 0.1<br>Favours T |
| Test for overall effect: $Z = 0.77$ ( $P = 0.44$ )                                                            |        |            |        |             |               |                                   |                       |

Figure S47. Two-year all-cause mortality. T2MI compared to T1MI.

| Study or Subgroup                                                                                             | T2MI   |            | T1MI   |             | Weight        | Odds Ratio<br>M-H, Random, 95% CI | M-H, R                |
|---------------------------------------------------------------------------------------------------------------|--------|------------|--------|-------------|---------------|-----------------------------------|-----------------------|
|                                                                                                               | Events | Total      | Events | Total       |               |                                   |                       |
| Cediel 2017                                                                                                   | 77     | 194        | 74     | 376         | 19.0%         | 2.69 [1.83, 3.94]                 |                       |
| Guimares 2018                                                                                                 | 19     | 76         | 156    | 847         | 15.9%         | 1.48 [0.85, 2.55]                 |                       |
| Neumann 2017                                                                                                  | 14     | 99         | 18     | 188         | 12.5%         | 1.56 [0.74, 3.28]                 |                       |
| Paiva 2015                                                                                                    | 62     | 236        | 92     | 764         | 19.3%         | 2.60 [1.81, 3.74]                 |                       |
| Srnilowitz 2018                                                                                               | 45     | 146        | 41     | 137         | 16.6%         | 1.04 [0.63, 1.73]                 |                       |
| Truong 2020                                                                                                   | 29     | 175        | 47     | 275         | 16.6%         | 0.96 [0.58, 1.60]                 |                       |
| <b>Total (95% CI)</b>                                                                                         |        | <b>926</b> |        | <b>2587</b> | <b>100.0%</b> | <b>1.63 [1.11, 2.41]</b>          |                       |
| Total events                                                                                                  | 246    |            | 428    |             |               |                                   |                       |
| Heterogeneity: $\text{Tau}^2 = 0.17$ ; $\text{Chi}^2 = 19.10$ , $\text{df} = 5$ ( $P = 0.002$ ); $I^2 = 74\%$ |        |            |        |             |               |                                   | 0.01 0.1<br>Favours T |
| Test for overall effect: $Z = 2.48$ ( $P = 0.01$ )                                                            |        |            |        |             |               |                                   |                       |

Figure S48. Three-year all-cause mortality. T2MI compared to T1MI.

| Study or Subgroup                                                                                              | T2MI   |            | T1MI   |             | Weight        | Odds Ratio<br>M-H, Random, 95% CI | M-H, R                |
|----------------------------------------------------------------------------------------------------------------|--------|------------|--------|-------------|---------------|-----------------------------------|-----------------------|
|                                                                                                                | Events | Total      | Events | Total       |               |                                   |                       |
| Kadesjo 2019                                                                                                   | 101    | 251        | 259    | 1111        | 36.0%         | 2.21 [1.66, 2.95]                 |                       |
| Lambrecht 2018                                                                                                 | 74     | 119        | 114    | 360         | 32.9%         | 3.55 [2.30, 5.47]                 |                       |
| Sato 2020                                                                                                      | 18     | 155        | 337    | 2834        | 31.1%         | 0.97 [0.59, 1.61]                 |                       |
| <b>Total (95% CI)</b>                                                                                          |        | <b>525</b> |        | <b>4305</b> | <b>100.0%</b> | <b>2.00 [1.07, 3.76]</b>          |                       |
| Total events                                                                                                   | 193    |            | 710    |             |               |                                   |                       |
| Heterogeneity: $\text{Tau}^2 = 0.27$ ; $\text{Chi}^2 = 14.69$ , $\text{df} = 2$ ( $P = 0.0006$ ); $I^2 = 86\%$ |        |            |        |             |               |                                   | 0.01 0.1<br>Favours T |
| Test for overall effect: $Z = 2.16$ ( $P = 0.03$ )                                                             |        |            |        |             |               |                                   |                       |

## References

1. Arora S, Strassle PD, Qamar A, Wheeler EN, Levine AL, Misenheimer JA, et al. Impact of Type 2 Myocardial Infarction (MI) on Hospital-Level MI Outcomes: Implications for Quality and Public Reporting. *Journal of the American Heart Association*. 2018;7(7).
2. Balanescu DV, Donisan T, Deswal A, Palaskas N, Song J, Lopez-Mattei J, et al. Acute myocardial infarction in a high-risk cancer population: Outcomes following conservative versus invasive management. *International journal of cardiology*. 2020;313:1-8.
3. Baron T, Hambraeus K, Sundström J, Erlinge D, Jernberg T, Lindahl B. Type 2 myocardial infarction in clinical practice. *Heart (British Cardiac Society)*. 2015;101(2):101-6.
4. Baron T, Hambraeus K, Sundström J, Erlinge D, Jernberg T, Lindahl B. Impact on Long-Term Mortality of Presence of Obstructive Coronary Artery Disease and Classification of Myocardial Infarction. *Am J Med*. 2016;129(4):398-406.
5. Bonaca MP, Wiviott SD, Braunwald E, Murphy SA, Ruff CT, Antman EM, et al. American College of Cardiology/American Heart Association/European Society of Cardiology/World Heart Federation universal definition of myocardial infarction classification system and the risk of cardiovascular death: observations from the TRITON-TIMI 38 trial (Trial to Assess Improvement in Therapeutic Outcomes by Optimizing Platelet Inhibition With Prasugrel-Thrombolysis in Myocardial Infarction 38). *Circulation*. 2012;125(4):577-83.
6. Cediël G, Gonzalez-Del-Hoyo M, Carrasquer A, Sanchez R, Boqué C, Bardají A. Outcomes with type 2 myocardial infarction compared with non-ischaemic myocardial injury. *Heart (British Cardiac Society)*. 2017;103(8):616-22.
7. Chapman AR, Shah ASV, Lee KK, Anand A, Francis O, Adamson P, et al. Long-Term Outcomes in Patients With Type 2 Myocardial Infarction and Myocardial Injury. *Circulation*. 2018;137(12):1236-45.
8. Chapman AR, Adamson PD, Shah ASV, Anand A, Strachan FE, Ferry AV, et al. High-Sensitivity Cardiac Troponin and the Universal Definition of Myocardial Infarction. *Circulation*. 2020;141(3):161-71.
9. Consuegra-Sánchez L, Martínez-Díaz JJ, de Guadiana-Romualdo LG, Wasniewski S, Esteban-Torrella P, Clavel-Ruipérez FG, et al. No additional value of conventional and high-sensitivity cardiac troponin over clinical scoring systems in the differential diagnosis of type 1 vs. type 2 myocardial infarction. *Clinical chemistry and laboratory medicine*. 2018;56(5):857-64.
10. El-Haddad H, Robinson E, Swett K, Wells GL. Prognostic implications of type 2 myocardial infarctions. 2012.
11. Etaher A, Gibbs OJ, Saad YM, Frost S, Nguyen TL, Ferguson I, et al. Type-II myocardial infarction and chronic myocardial injury rates, invasive management, and 4-year mortality among consecutive patients undergoing high-sensitivity troponin T testing in the emergency department. *European heart journal Quality of care & clinical outcomes*. 2020;6(1):41-8.
12. Furie N, Israel A, Gilad L, Neuman G, Assad F, Ben-Zvi I, et al. Type 2 myocardial infarction in general medical wards: Clinical features, treatment, and prognosis in comparison with type 1 myocardial infarction. *Medicine*. 2019;98(41):e17404.
13. Guimarães PO, Leonardi S, Huang Z, Wallentin L, de Werf FV, Aylward PE, et al. Clinical features and outcomes of patients with type 2 myocardial infarction: Insights from the Thrombin Receptor Antagonist for Clinical Event Reduction in Acute Coronary Syndrome (TRACER) trial. *Am Heart J*. 2018;196:28-35.
14. Hawatmeh A, Thawabi M, Aggarwal R, Abirami C, Vavilin I, Wasty N, et al. Implications of Misclassification of Type 2 Myocardial Infarction on Clinical Outcomes. *Cardiovascular revascularization medicine : including molecular interventions*. 2020;21(2):176-9.

15. Higuchi S, Suzuki M, Horiuchi Y, Tanaka H, Saji M, Yoshino H, et al. Higher non-cardiac mortality and lesser impact of early revascularization in patients with type 2 compared to type 1 acute myocardial infarction: results from the Tokyo CCU Network registry. *Heart Vessels*. 2019;34(7):1140-7.
16. Javed U, Aftab W, Ambrose JA, Wessel RJ, Mouanoutoua M, Huang G, et al. Frequency of elevated troponin I and diagnosis of acute myocardial infarction. *The American journal of cardiology*. 2009;104(1):9-13.
17. Kadesjö E, Roos A, Siddiqui A, Desta L, Lundbäck M, Holzmann MJ. Acute versus chronic myocardial injury and long-term outcomes. *Heart (British Cardiac Society)*. 2019;105(24):1905-12.
18. Lambrecht S, Sarkisian L, Saaby L, Poulsen TS, Gerke O, Hosbond S, et al. Different Causes of Death in Patients with Myocardial Infarction Type 1, Type 2, and Myocardial Injury. *Am J Med*. 2018;131(5):548-54.
19. Landes U, Bental T, Orvin K, Vaknin-Assa H, Rechavia E, Iakobishvili Z, et al. Type 2 myocardial infarction: A descriptive analysis and comparison with type 1 myocardial infarction. *Journal of cardiology*. 2016;67(1):51-6.
20. López-Cuenca A, Gómez-Molina M, Flores-Blanco PJ, Sánchez-Martínez M, García-Narbon A, De Las Heras-Gómez I, et al. Comparison between type-2 and type-1 myocardial infarction: clinical features, treatment strategies and outcomes. *J Geriatr Cardiol*. 2016;13(1):15-22.
21. Meigher S, Thode HC, Peacock WF, Bock JL, Gruberg L, Singer AJ. Causes of Elevated Cardiac Troponins in the Emergency Department and Their Associated Mortality. *Academic emergency medicine : official journal of the Society for Academic Emergency Medicine*. 2016;23(11):1267-73.
22. Nestelberger T, Boeddinghaus J, Badertscher P, Twerenbold R, Wildi K, Breitenbücher D, et al. Effect of Definition on Incidence and Prognosis of Type 2 Myocardial Infarction. *J Am Coll Cardiol*. 2017;70(13):1558-68.
23. Neumann JT, Sörensen NA, RübSamen N, Ojeda F, Renné T, Qaderi V, et al. Discrimination of patients with type 2 myocardial infarction. *Eur Heart J*. 2017;38(47):3514-20.
24. Paiva L, Providência R, Barra S, Dinis P, Faustino AC, Gonçalves L. Universal definition of myocardial infarction: clinical insights. *Cardiology*. 2015;131(1):13-21.
25. Pandey AK, Duong T, Swiatkiewicz I, Daniels LB. A Comparison of Biomarker Rise in Type 1 and Type 2 Myocardial Infarction. *The American journal of medicine*. 2020;133(10):1203-8.
26. Putot A, Derrida SB, Zeller M, Avondo A, Ray P, Manckoundia P, et al. Short-Term Prognosis of Myocardial Injury, Type 1, and Type 2 Myocardial Infarction in the Emergency Unit. *Am J Med*. 2018;131(10):1209-19.
27. Putot A, Jeanmichel M, Chagué F, Avondo A, Ray P, Manckoundia P, et al. Type 1 or type 2 myocardial infarction in patients with a history of coronary artery disease: Data from the emergency department. *Journal of Clinical Medicine*. 2019;8(12).
28. Putot A, Jeanmichel M, Chague F, Manckoundia P, Cottin Y, Zeller M. Type 2 Myocardial Infarction: A Geriatric Population-based Model of Pathogenesis. *Aging and disease*. 2020;11(1):108-17.
29. Radovanovic D, Pilgrim T, Seifert B, Urban P, Pedrazzini G, Erne P. Type 2 myocardial infarction: incidence, presentation, treatment and outcome in routine clinical practice. *Journal of cardiovascular medicine (Hagerstown, Md)*. 2017;18(5):341-7.
30. Raphael CE, Roger VL, Sandoval Y, Singh M, Bell M, Lerman A, et al. Incidence, Trends, and Outcomes of Type 2 Myocardial Infarction in a Community Cohort. *Circulation*. 2020;141(6):454-63.
31. Reed GW, Horr S, Young L, Clevenger J, Malik U, Ellis SG, et al. Associations Between Cardiac Troponin, Mechanism of Myocardial Injury, and Long-Term Mortality After Noncardiac Vascular Surgery. *Journal of the American Heart Association*. 2017;6(6).
32. Saaby L, Poulsen TS, Hosbond S, Larsen TB, Pyndt Diederichsen AC, Hallas J, et al. Classification of myocardial infarction: frequency and features of type 2 myocardial infarction. *Am J Med*. 2013;126(9):789-97.

- 1  
2  
3  
4  
5  
6 33. Saaby L, Poulsen TS, Diederichsen AC, Hosbond S, Larsen TB, Schmidt H, et al. Mortality rate in  
7 type 2 myocardial infarction: observations from an unselected hospital cohort. *Am J Med.*  
8 2014;127(4):295-302.  
9 34. Sandoval Y, Thordsen SE, Smith SW, Schulz KM, Murakami MM, Pearce LA, et al. Cardiac  
10 troponin changes to distinguish type 1 and type 2 myocardial infarction and 180-day mortality risk.  
11 *European heart journal Acute cardiovascular care.* 2014;3(4):317-25.  
12 35. Sandoval Y, Smith SW, Sexter A, Thordsen SE, Bruen CA, Carlson MD, et al. Type 1 and 2  
13 Myocardial Infarction and Myocardial Injury: Clinical Transition to High-Sensitivity Cardiac Troponin I.  
14 *Am J Med.* 2017;130(12):1431-9.e4.  
15 36. Sato R, Sakamoto K, Kaikita K, Tsujita K, Nakao K, Ozaki Y, et al. Long-Term Prognosis of Patients  
16 with Myocardial Infarction Type 1 and Type 2 with and without Involvement of Coronary Vasospasm.  
17 *Journal of clinical medicine.* 2020;9(6).  
18 37. Shah AS, McAllister DA, Mills R, Lee KK, Churchhouse AM, Fleming KM, et al. Sensitive troponin  
19 assay and the classification of myocardial infarction. *Am J Med.* 2015;128(5):493-501.e3.  
20 38. Singh A, Gupta A, DeFilippis EM, Qamar A, Biery DW, Almarzooq Z, et al. Cardiovascular  
21 Mortality After Type 1 and Type 2 Myocardial Infarction in Young Adults. *Journal of the American*  
22 *College of Cardiology.* 2020;75(9):1003-13.  
23 39. Smilowitz NR, Subramanyam P, Gianos E, Reynolds HR, Shah B, Sedlis SP. Treatment and  
24 outcomes of type 2 myocardial infarction and myocardial injury compared with type 1 myocardial  
25 infarction. *Coronary artery disease.* 2018;29(1):46-52.  
26 40. Stein GY, Herscovici G, Korenfeld R, Matetzky S, Gottlieb S, Alon D, et al. Type-II myocardial  
27 infarction--patient characteristics, management and outcomes. *PLoS One.* 2014;9(1):e84285.  
28 41. Truong HH, Victor MV, Imad MA, Kobalava ZD, Parvathy UT, Al-Zakwani I. Mortality and  
29 morbidity associated with type 2 myocardial infarction: A single-center study. *Annals of Clinical*  
30 *Cardiology.* 2020;2(2):70-9.  
31  
32  
33  
34  
35  
36  
37  
38  
39  
40  
41  
42  
43  
44  
45  
46  
47  
48  
49  
50  
51  
52  
53  
54  
55  
56  
57  
58  
59  
60

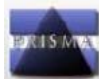

## PRISMA 2020 Checklist

| Section and Topic             | Item # | Checklist item                                                                                                                                                                                                                                                                                       | Location where item is reported |
|-------------------------------|--------|------------------------------------------------------------------------------------------------------------------------------------------------------------------------------------------------------------------------------------------------------------------------------------------------------|---------------------------------|
| <b>TITLE</b>                  |        |                                                                                                                                                                                                                                                                                                      |                                 |
| Title                         | 1      | Identify the report as a systematic review.                                                                                                                                                                                                                                                          | 1                               |
| <b>ABSTRACT</b>               |        |                                                                                                                                                                                                                                                                                                      |                                 |
| Abstract                      | 2      | See the PRISMA 2020 for Abstracts checklist.                                                                                                                                                                                                                                                         | 3                               |
| <b>INTRODUCTION</b>           |        |                                                                                                                                                                                                                                                                                                      |                                 |
| Rationale                     | 3      | Describe the rationale for the review in the context of existing knowledge.                                                                                                                                                                                                                          | 4                               |
| Objectives                    | 4      | Provide an explicit statement of the objective(s) or question(s) the review addresses.                                                                                                                                                                                                               | 4                               |
| <b>METHODS</b>                |        |                                                                                                                                                                                                                                                                                                      |                                 |
| Eligibility criteria          | 5      | Specify the inclusion and exclusion criteria for the review and how studies were grouped for the syntheses.                                                                                                                                                                                          | 4                               |
| Information sources           | 6      | Specify all databases, registers, websites, organisations, reference lists and other sources searched or consulted to identify studies. Specify the date when each source was last searched or consulted.                                                                                            | 4                               |
| Search strategy               | 7      | Present the full search strategies for all databases, registers and websites, including any filters and limits used.                                                                                                                                                                                 | Supp                            |
| Selection process             | 8      | Specify the methods used to decide whether a study met the inclusion criteria of the review, including how many reviewers screened each record and each report retrieved, whether they worked independently, and if applicable, details of automation tools used in the process.                     | 4                               |
| Data collection process       | 9      | Specify the methods used to collect data from reports, including how many reviewers collected data from each report, whether they worked independently, any processes for obtaining or confirming data from study investigators, and if applicable, details of automation tools used in the process. | 4                               |
| Data items                    | 10a    | List and define all outcomes for which data were sought. Specify whether all results that were compatible with each outcome domain in each study were sought (e.g. for all measures, time points, analyses), and if not, the methods used to decide which results to collect.                        | 4                               |
|                               | 10b    | List and define all other variables for which data were sought (e.g. participant and intervention characteristics, funding sources). Describe any assumptions made about any missing or unclear information.                                                                                         | 4                               |
| Study risk of bias assessment | 11     | Specify the methods used to assess risk of bias in the included studies, including details of the tool(s) used, how many reviewers assessed each study and whether they worked independently, and if applicable, details of automation tools used in the process.                                    | 5                               |
| Effect measures               | 12     | Specify for each outcome the effect measure(s) (e.g. risk ratio, mean difference) used in the synthesis or presentation of results.                                                                                                                                                                  | 5                               |
| Synthesis methods             | 13a    | Describe the processes used to decide which studies were eligible for each synthesis (e.g. tabulating the study intervention characteristics and comparing against the planned groups for each synthesis (item #5)).                                                                                 | 5                               |
|                               | 13b    | Describe any methods required to prepare the data for presentation or synthesis, such as handling of missing summary statistics, or data conversions.                                                                                                                                                | 5                               |
|                               | 13c    | Describe any methods used to tabulate or visually display results of individual studies and syntheses.                                                                                                                                                                                               | 5                               |
|                               | 13d    | Describe any methods used to synthesize results and provide a rationale for the choice(s). If meta-analysis was performed, describe the model(s), method(s) to identify the presence and extent of statistical heterogeneity, and software package(s) used.                                          | 5                               |
|                               | 13e    | Describe any methods used to explore possible causes of heterogeneity among study results (e.g. subgroup analysis, meta-regression).                                                                                                                                                                 | 5                               |
|                               | 13f    | Describe any sensitivity analyses conducted to assess robustness of the synthesized results.                                                                                                                                                                                                         | N/A                             |
| Reporting bias assessment     | 14     | Describe any methods used to assess risk of bias due to missing results in a synthesis (arising from reporting biases).                                                                                                                                                                              | 5                               |
| Certainty                     | 15     | Describe any methods used to assess certainty (or confidence) in the body of evidence for an outcome.                                                                                                                                                                                                | N/A                             |

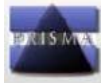

## PRISMA 2020 Checklist

| Section and Topic                              | Item # | Checklist item                                                                                                                                                                                                                                                                       | Location where item is reported |
|------------------------------------------------|--------|--------------------------------------------------------------------------------------------------------------------------------------------------------------------------------------------------------------------------------------------------------------------------------------|---------------------------------|
| assessment                                     |        |                                                                                                                                                                                                                                                                                      |                                 |
| <b>RESULTS</b>                                 |        |                                                                                                                                                                                                                                                                                      |                                 |
| Study selection                                | 16a    | Describe the results of the search and selection process, from the number of records identified in the search to the number of studies included in the review, ideally using a flow diagram.                                                                                         | 5                               |
|                                                | 16b    | Cite studies that might appear to meet the inclusion criteria, but which were excluded, and explain why they were excluded.                                                                                                                                                          | 5                               |
| Study characteristics                          | 17     | Cite each included study and present its characteristics.                                                                                                                                                                                                                            | Supp                            |
| Risk of bias in studies                        | 18     | Present assessments of risk of bias for each included study.                                                                                                                                                                                                                         | Supp                            |
| Results of individual studies                  | 19     | For all outcomes, present, for each study: (a) summary statistics for each group (where appropriate) and (b) an effect estimate and its precision (e.g. confidence/credible interval), ideally using structured tables or plots.                                                     | Supp                            |
| Results of syntheses                           | 20a    | For each synthesis, briefly summarise the characteristics and risk of bias among contributing studies.                                                                                                                                                                               | Supp                            |
|                                                | 20b    | Present results of all statistical syntheses conducted. If meta-analysis was done, present for each the summary estimate and its precision (e.g. confidence/credible interval) and measures of statistical heterogeneity. If comparing groups, describe the direction of the effect. | Supp                            |
|                                                | 20c    | Present results of all investigations of possible causes of heterogeneity among study results.                                                                                                                                                                                       | Supp                            |
|                                                | 20d    | Present results of all sensitivity analyses conducted to assess the robustness of the synthesized results.                                                                                                                                                                           | N/A                             |
| Reporting biases                               | 21     | Present assessments of risk of bias due to missing results (arising from reporting biases) for each synthesis assessed.                                                                                                                                                              | N/A                             |
| Certainty of evidence                          | 22     | Present assessments of certainty (or confidence) in the body of evidence for each outcome assessed.                                                                                                                                                                                  | N/A                             |
| <b>DISCUSSION</b>                              |        |                                                                                                                                                                                                                                                                                      |                                 |
| Discussion                                     | 23a    | Provide a general interpretation of the results in the context of other evidence.                                                                                                                                                                                                    | 7                               |
|                                                | 23b    | Discuss any limitations of the evidence included in the review.                                                                                                                                                                                                                      | 9                               |
|                                                | 23c    | Discuss any limitations of the review processes used.                                                                                                                                                                                                                                | 9                               |
|                                                | 23d    | Discuss implications of the results for practice, policy, and future research.                                                                                                                                                                                                       | 9                               |
| <b>OTHER INFORMATION</b>                       |        |                                                                                                                                                                                                                                                                                      |                                 |
| Registration and protocol                      | 24a    | Provide registration information for the review, including register name and registration number, or state that the review was not registered.                                                                                                                                       | 4                               |
|                                                | 24b    | Indicate where the review protocol can be accessed, or state that a protocol was not prepared.                                                                                                                                                                                       | 4                               |
|                                                | 24c    | Describe and explain any amendments to information provided at registration or in the protocol.                                                                                                                                                                                      | N/A                             |
| Support                                        | 25     | Describe sources of financial or non-financial support for the review, and the role of the funders or sponsors in the review.                                                                                                                                                        | N/A                             |
| Competing interests                            | 26     | Declare any competing interests of review authors.                                                                                                                                                                                                                                   | N/A                             |
| Availability of data, code and other materials | 27     | Report which of the following are publicly available and where they can be found: template data collection forms; data extracted from included studies; data used for all analyses; analytic code; any other materials used in the review.                                           | N/A                             |



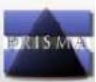

# PRISMA 2020 Checklist

- 1
- 2
- 3
- 4
- 5
- 6
- 7
- 8
- 9
- 10
- 11
- 12
- 13
- 14
- 15
- 16
- 17
- 18
- 19
- 20
- 21
- 22
- 23
- 24
- 25
- 26
- 27
- 28
- 29
- 30
- 31
- 32
- 33
- 34
- 35
- 36
- 37
- 38
- 39
- 40
- 41
- 42
- 43
- 44
- 45
- 46
- 47

10.1136/bmj.n71

For more information, visit: <http://www.prisma-statement.org/>

For peer review only

# BMJ Open

## Diagnostic features, management, and prognosis of Type 2 myocardial infarction compared to Type 1 myocardial infarction: A systematic review and meta-analysis.

|                                 |                                                                                                                                                                                                                                                                                                                              |
|---------------------------------|------------------------------------------------------------------------------------------------------------------------------------------------------------------------------------------------------------------------------------------------------------------------------------------------------------------------------|
| Journal:                        | <i>BMJ Open</i>                                                                                                                                                                                                                                                                                                              |
| Manuscript ID                   | bmjopen-2021-055755.R1                                                                                                                                                                                                                                                                                                       |
| Article Type:                   | Original research                                                                                                                                                                                                                                                                                                            |
| Date Submitted by the Author:   | 05-Nov-2021                                                                                                                                                                                                                                                                                                                  |
| Complete List of Authors:       | White, Kyle; Princess Alexandra Hospital; University of Queensland Kinarivala, Mansey; Princess Alexandra Hospital, Internal Medicine and Clinical Epidemiology<br>Scott, Ian; University of Queensland, School of Clinical Medicine; Princess Alexandra Hospital, Department of Internal Medicine and Clinical Epidemiology |
| <b>Primary Subject Heading</b>: | Cardiovascular medicine                                                                                                                                                                                                                                                                                                      |
| Secondary Subject Heading:      | Cardiovascular medicine, Diagnostics                                                                                                                                                                                                                                                                                         |
| Keywords:                       | Coronary heart disease < CARDIOLOGY, Ischaemic heart disease < CARDIOLOGY, Myocardial infarction < CARDIOLOGY                                                                                                                                                                                                                |
|                                 |                                                                                                                                                                                                                                                                                                                              |

SCHOLARONE™  
Manuscripts



I, the Submitting Author has the right to grant and does grant on behalf of all authors of the Work (as defined in the below author licence), an exclusive licence and/or a non-exclusive licence for contributions from authors who are: i) UK Crown employees; ii) where BMJ has agreed a CC-BY licence shall apply, and/or iii) in accordance with the terms applicable for US Federal Government officers or employees acting as part of their official duties; on a worldwide, perpetual, irrevocable, royalty-free basis to BMJ Publishing Group Ltd ("BMJ") its licensees and where the relevant Journal is co-owned by BMJ to the co-owners of the Journal, to publish the Work in this journal and any other BMJ products and to exploit all rights, as set out in our [licence](#).

The Submitting Author accepts and understands that any supply made under these terms is made by BMJ to the Submitting Author unless you are acting as an employee on behalf of your employer or a postgraduate student of an affiliated institution which is paying any applicable article publishing charge ("APC") for Open Access articles. Where the Submitting Author wishes to make the Work available on an Open Access basis (and intends to pay the relevant APC), the terms of reuse of such Open Access shall be governed by a Creative Commons licence – details of these licences and which [Creative Commons](#) licence will apply to this Work are set out in our licence referred to above.

Other than as permitted in any relevant BMJ Author's Self Archiving Policies, I confirm this Work has not been accepted for publication elsewhere, is not being considered for publication elsewhere and does not duplicate material already published. I confirm all authors consent to publication of this Work and authorise the granting of this licence.

## Title Page

### Manuscript Title

Diagnostic features, management, and prognosis of Type 2 myocardial infarction compared to Type 1 myocardial infarction: A systematic review and meta-analysis.

### Authors

Dr Kyle White

Princess Alexandra Hospital, Brisbane, Australia

University of Queensland, Brisbane, Australia

BSc, MBBS, FRACP, FCICM, MPH

Dr Mansey Kinarivala

Princess Alexandra Hospital, Brisbane, Australia

MBBS, FRACP

Prof Ian Scott

Princess Alexandra Hospital, Brisbane, Australia

University of Queensland, Brisbane, Australia

MEd, MHA, MBBS, FRACP

### Corresponding Author

Dr Kyle White

Princess Alexandra Hospital

199 Ipswich Road, Wolloongabba, 4102

Ph: +61731762111

Email: [kyle.white@health.qld.gov.au](mailto:kyle.white@health.qld.gov.au)

### Manuscript Word Count

3541

## Abstract

### Importance

Distinguishing type 2 (T2MI) from type 1 myocardial infarction (T1MI) in clinical practice can be difficult, and the management and prognosis for T2MI remain uncertain.

### Objective

To compare precipitating factors, risk factors, investigations, management, and outcomes for T2MI and T1MI.

### Data Sources

MEDLINE and EMBASE databases as well as reference list of recent articles were searched January 2009 to December 2020 for term “type 2 myocardial infarction”.

### Study Selection

Studies were included if they analysed if universal definition of MI was used and reported quantitative data on at least one variable of interest.

### Data Extraction and Synthesis

Data was pooled using random-effect meta-analysis. Risk of bias was assessed using Newcastle-Ottawa Quality Assessment Form. Preferred Reporting Items for Systematic Reviews and Meta-analyses (PRISMA) guidelines were followed. All review stages were conducted by two reviewers.

### Main Outcomes and Measures

Risk factors, presenting symptoms, cardiac investigations such as troponin and angiogram, management, and outcomes such as mortality.

### Results

41 cohort studies comprising 116,565 T1MI and 15,258 T2MI patients were included. Compared to T1MI, T2MI patients were: more likely to have pre-existing chronic kidney disease (OR 1.89; 95%CI 1.59-2.25) and chronic heart failure (OR 2.34; 95%CI 1.87-2.93), less likely to present with typical cardiac symptoms of chest pain (OR 0.19; 95%CI 0.15-0.26) and more likely to present with dyspnoea (OR 2.83; 95%CI 1.96-4.08); more likely to demonstrate non-specific ST-T wave changes on electrocardiography (OR 2.62; 95%CI 1.81-3.79) and less likely to show ST elevation (OR 0.22; 95%CI 0.18-0.28); less likely to undergo coronary angiography (OR 0.09; 95%CI 0.06-0.12) and percutaneous coronary intervention (OR 0.06; 95%CI 0.04-0.10) or receive cardioprotective medications, such as statins (OR 0.25; 95%CI 0.17-0.36) and beta-blockers (OR 0.46; 95%CI 0.34-0.62). T2MI had more risk of all cause one-year mortality (OR 2.94; 95%CI 2.07-4.17), with no differences in cardiovascular deaths (OR 1.17; 95%CI 0.70-1.97).

### Conclusion and Relevance

This review has identified clinical, management and survival differences between T2MI and T1MI with greater precision and scope than previously reported. Differential use of coronary

1  
2  
3 revascularisation and cardioprotective medications highlight ongoing uncertainty of their utility in  
4 T2MI compared to T1MI.  
5  
6  
7  
8  
9  
10  
11

## 12 Strength and Limitations

- 13 • Inclusion of all contemporary cohort studies in the troponin era
  - 14 • Large patient population of T2MI and T1MI patients analysed allowing high level of precision
  - 15 • Wide array of clinically significant variables assessed providing a comprehensive analysis
  - 16 • Analysis of crude mortality only was possible due to lack of individual patient data
- 17  
18  
19  
20  
21  
22  
23  
24  
25  
26  
27  
28  
29  
30  
31  
32  
33  
34  
35  
36  
37  
38  
39  
40  
41  
42  
43  
44  
45  
46  
47  
48  
49  
50  
51  
52  
53  
54  
55  
56  
57  
58  
59  
60

## Introduction

The clinical definition of myocardial infarction has evolved over time. The 2007 Universal Definition of Myocardial Infarction included a subset of MI that was secondary to aetiologies unrelated to underlying occlusive coronary artery disease (1). In 2012, the Third Universal Definition of Myocardial Infarction Consensus Document (2) gave rise to the aetiological distinction between T1MI, defined as MI due to plaque erosion and/or rupture, and T2MI, defined as MI caused by increased oxygen demand or decreased blood supply, in the absence of acute plaque rupture or coronary thrombosis. More recently, in 2018, the Fourth Universal definition of MI updated concepts of T2MI regarding specific situations associated with oxygen demand and supply imbalance and the relevance of the presence or absence of underlying coronary artery disease to therapy and prognosis (3). (see on-line supplement Table S1 for more detail)

In clinical practice, distinguishing T2MI from T1MI based on clinical presentation, electrocardiograph (ECG) features and cardiac troponin (cTn) values can be difficult. In the absence of randomised controlled trials that have evaluated different investigational and therapeutic interventions in patients with T2MI, uncertainty remains around the appropriate management of such patients, particularly those with known or suspected coronary artery disease. Past reviews have assessed one or more attributes of T2MI in comparison to T1MI (4-8) but, to our knowledge, none have undertaken a comprehensive analysis of symptoms, physical signs, investigation results, management regimens and clinical outcomes, both short and long term, of T2MI versus T1MI.

We undertook a systematic review of observational studies with the aims of identifying diagnostic and investigational findings which can assist clinicians to better distinguish T2MI from T1MI, and compare T2MI with T1MI in defining differences in management strategies and clinical outcomes.

## Methods

### Study design

The review was undertaken in accordance with recommendations of the Cochrane Collaboration and Preferred Reporting Items for Systematic Reviews and Meta-Analyses (PRISMA) statement (9). Our review was registered on PROSPERO prior to commencement (Registration number: CRD42021237746). MEDLINE and EMBASE databases were searched for all studies published between January 1st, 2009, and December 31st, 2020, using search terms to identify all studies related to T2MI (see Table S2). Reference lists of all relevant articles were also assessed to identify additional relevant studies. The study PRISMA flowchart is shown in Figure S1.

Studies were included if they: 1) compared patient populations with T2MI and T1MI, 2) used a universal definition of MI, 3) included at least one variable of interest, 4) were available as full text in English and 5) were either a randomised control trial or comparative observational study. Studies were excluded if: 1) no full text was available, 2) duplicate data was utilised or 3) less than 200 participants in total were included. Initial screening of titles and abstracts for eligible studies was performed independently by two authors (MK, KW), as was full text review for inclusion, with any differences in review settled by consensus agreement.

### Data collection and synthesis

1  
2  
3 Data pertaining to all variables of interest were collected from all included studies using a  
4 standardised proforma by one author (MK) and independently reviewed by the second author (KW).  
5 These variables comprised: study dates, design, sample size, definition used to define T2MI and  
6 T1MI, patient demographics, pre-existing medical conditions, precipitating factors, clinical  
7 symptoms, ECG findings, laboratory values, echocardiographic results, any clinical interventions or  
8 medical treatments administered, and clinical outcomes observed.  
9  
10

11 Data on variables reported as, or able to be converted to, raw numbers, were pooled from all studies  
12 and subject to comparative meta-analysis using Review Manager (RevMan, Computer program.  
13 Version 5.3. Copenhagen: The Nordic Cochrane Centre, The Cochrane Collaboration, 2014). For each  
14 variable, the weighted odds ratio (OR) comparing T2MI to T1MI, and its 95% confidence interval (CI),  
15 was calculated using the random effects method. As specified in the registered study protocol, the  
16 random effects method was used in anticipation of study heterogeneity of at least moderate degree  
17 ( $I^2$  statistic of heterogeneity >50%) (10). In addition to the weighted OR, we also report the crude,  
18 unweighted total event rates for each variable subject to meta-analysis in order to provide a more  
19 clinically meaningful estimate of the prevalence of these events in each patient group in view of the  
20 large sample sizes. Studies reporting mean or median values only were reproduced as reported in  
21 the original study.  
22  
23  
24  
25

26 Risk of bias within each study was assessed using the Newcastle-Ottawa quality assessment tool for  
27 cohort studies (11, 12), with scores 7-8 denoting good quality studies, 4-6 fair quality, and 0-3 poor  
28 quality.  
29  
30

### 31 Patient and Public Involvement

32 We did not seek patient or public comment in designing the study.  
33  
34  
35

## 36 Results

37 A total of 41 studies were included for analysis (13-53) and their characteristics are summarised in  
38 Table S3. They comprised a total of 131,823 participants of whom 116,565 participants (88%) were  
39 classified as T1MI and 15,258 (12%) as T2MI. In the following text, we report key findings; more  
40 information and forest plots for each analysis involving more than one study and more than 100  
41 total cases can be found in the on-line supplement, Figures S2-S43.  
42  
43  
44

45 The 2007 definition (1) was used in 8 (19%) studies (15-17, 28, 30, 44, 45, 52), the 2012 definition (2)  
46 in 25 (61%) studies (13, 18, 20-22, 24-27, 31-36, 38, 40, 41, 43, 46-49, 51, 53), and the 2018  
47 definition (3) in 8 (19%) studies (14, 19, 23, 29, 37, 39, 42, 50). Of the 41 studies, 18 (44%) were  
48 prospective (15-17, 19, 20, 23, 30, 34, 35, 37, 38, 44, 45, 47-49, 51, 52) and 23 (56%) were  
49 retrospective (13, 14, 18, 21, 22, 24-29, 31-33, 36, 39-43, 47, 50, 53).  
50  
51  
52

### 53 Risk of bias assessment

54 Of the 41 studies, 32 (78%) were assessed as good quality (13, 15-20, 23, 24, 28-36, 38-47, 49, 53), 6  
55 (15%) as fair quality (14, 25-27, 50), and 3 (7%) as poor quality (21, 37, 48), as summarised in Table  
56 S4. Selection bias resulting in unrepresentative cohorts such as admission criteria to coronary care  
57 units or entry criteria into MI registries favouring T1MI (14, 21, 25-27, 37, 48, 50), absence of  
58 independent adjudication of MI type as T1MI or T2MI (37, 39, 48), non-comparability of T1MI and  
59  
60



1  
2  
3 T2MI cohorts (21, 25, 26, 48), poorly specified outcome measures (37, 39, 48) and short follow-up  
4 period resulting in few events (14, 21, 25, 37) comprised most forms of bias.  
5  
6

## 7 Participant characteristics

8 Patients with T1MI had a median age range of 60-82 years in the included studies that did not select  
9 a specific age population, compared to a median age range of 62-79 years in patients with T2MI. The  
10 sex distribution was also similar, with 59.8% and 54% of patients with T1MI and T2MI being male  
11 respectively.  
12  
13

14 Regarding pre-existing medical conditions (Table 1), T2MI patients compared to T1MI patients were  
15 more likely to have chronic kidney disease (26.9% vs 19.3%; OR 1.89; 95%CI 1.59-2.25), chronic heart  
16 failure (19% vs 8.1%; OR 2.34; 95%CI 1.87-2.93), atrial fibrillation (22.9% vs 6.1%; OR 3.02; 95%CI  
17 2.29-3.99), and hypertension (66.8% vs 61.3%; OR 1.22; 95%CI 1.05-1.43). Patients with T2MI were  
18 less likely to have dyslipidaemia (43.4% vs 45.9%; OR 0.74; 95%CI 0.58-0.94) and smoking history  
19 (37.2% vs 53.9%; OR 0.61; 95%CI 0.50-0.74). There was no difference in the prevalence of type 2  
20 diabetes mellitus or ischaemic heart disease between the two groups.  
21  
22  
23

## 24 Precipitating factors

25 Less than half of the studies (n=18; 44%) included data on precipitating factors associated with T2MI  
26 (13, 15, 16, 18, 20, 22-25, 28, 32, 33, 36, 41, 45, 46, 51, 52). Data on each precipitating factor was  
27 not consistently available across the studies, for example only 18 studies representing 45% of T2MI  
28 patients assessed presence of arrhythmia  
29  
30  
31

32 The most common precipitant was sepsis (35.9%), followed by arrhythmia (29.8%), and heart failure  
33 28.6% (Table S5), with non-cardiac surgery being deemed a cause in 12.2% of cases where data for  
34 this variable were collected.  
35  
36

## 37 Presenting clinical features

38 As summarised in Table S6, compared to T1MI patients, T2MI patients were less likely to present  
39 with typical cardiac symptoms of chest pain (59.2% vs 87.7%; OR 0.19; 95%CI 0.15-0.26) or  
40 discomfort in the arm or shoulder (8.5% vs 35%; OR 0.18; 95%CI 0.11-0.3), but more likely to  
41 present with dyspnoea (27.6% vs 9.9%; OR 2.83; 95%CI 1.96-4.08).  
42  
43  
44

## 45 Investigations

46 ECG findings on presentation (Table S7) such as ST elevation (13.4% vs 42.1%; OR 0.22; 95%CI 0.18-  
47 0.28) and pathological Q waves (6.7% vs 20.8%; OR 0.38; 95%CI 0.20-0.71) were less evident in T2MI  
48 than in T1MI. In contrast, non-specific ST-T wave changes (24.7% vs 10.8%; OR 2.62; 95%CI 1.81-  
49 3.79), and atrial arrhythmias (27% vs 10.2%; OR 3.70; 95%CI 2.87-4.77) were more common among  
50 T2MI. No differences between groups were seen in the frequency of ST depression or T wave  
51 inversion.  
52  
53  
54

55 Among the 41 studies, five studies (12%) reported the use of high-sensitivity cardiac troponin (cTn)  
56 assays, 22 (54%) reported sensitive assays, and 14 (34%) did not specify what generation assay was  
57 used (Table S3b). The results of troponin assays were reported in 27 (66%) studies, specific to cTnI  
58 assays in 19 studies, cTnT in 6, both assays in one, while another did not specify the assay used. Only  
59  
60

two of these studies reporting troponin failed to state the upper limit of normal (ULN) of the assay used (24, 32). The troponin assays, and therefore units and reference ranges, varied between the studies, preventing direct comparison of troponin values. As a result, we converted troponin values to a multiple of the upper limit of normal for each assay to allow direct comparison (Table S8). For peak troponin, patients with T1MI had a higher and wider range of between 5 and 1702 times the ULN compared to patients with T2MI with a range of 2.8-447 times the ULN. Studies yielded mixed results as to whether the magnitude of change (or delta) in serial cardiac troponin assays was more predictive of T2MI or T1MI compared to absolute values of peak levels (34). Lowering the diagnostic threshold for troponin with the advent of more sensitive assays has increased the numbers of patients identified with T2MI by up to 50% (37), with more recent studies showing the incidence of T2MI equalling or exceeding that of T1MI (16, 34, 37).

Echocardiography was less frequently performed among T2MI than T1MI patients (47.9% vs 55.5%; OR 0.44; 95%CI 0.20-0.96) and when reported (Table S7), there was no difference in the prevalence of regional wall motion abnormalities or the level of left ventricular (LV) function, with reported median LV ejection fraction being 42.3%-55% in T1MI patients and 40%-56% in T2MI patients.

Coronary angiography was also less frequently performed among T2MI than in T1MI patients (34.4% vs 83.4%; OR 0.09; 95%CI 0.06-0.12, Table S7). When performed, T2MI patients were less likely to demonstrate obstructive coronary artery disease (34% vs 44.9%; OR 0.16; 95%CI 0.05-0.54), with obstruction variously defined as 50%-70% occlusion of one or more vessels.

## Management

T2MI patients, compared to T1MI patients, were significantly less likely to receive conventional cardioprotective medications (Table 2), comprising beta-blockers (61.6% vs 78.2%; OR 0.46; 95%CI 0.34-0.62), anti-platelet agents (57.4% vs 87.3%; OR 0.24; 95%CI 0.17-0.36) and statins (55.3% vs 87.2%; OR 0.25; 95%CI 0.17-0.36). Of note, T2MI patients were more likely to receive diuretics (46.5% vs 18.8%; OR 1.99; 95%CI 1.56-2.53) or anti-coagulants (26.1% vs 21.3%; OR 1.90; 95%CI 1.17-3.10).

Percutaneous coronary intervention (PCI) (20% vs 75.1%; OR 0.06; 95%CI 0.04-0.10) and coronary artery bypass surgery (2.4% vs 6.1%; OR 0.23; 95%CI 0.12-0.42) were also significantly less likely to be performed in T2MI patients than T1MI patients.

## Prognosis

T2MI patients had significantly increased risk of all-cause death compared to patients with T1MI in both short- and long-term follow-up (Table 3). Specifically, compared to T1MI patients, T2MI demonstrated increased all-cause mortality in-hospital (12.5% vs 5.8%; OR 1.94; 95%CI 1.35-2.79, Figure S44), at one-year (20.6% vs 8.8%; OR 2.94; 95%CI 2.07-4.17, Figure 1) and at 5 to 10 years, (53.7% vs 28.5%, OR 3.24; 95%CI 2.73-3.84, Figure 2). In contrast, there were no differences between T2MI and T1MI patients in the risk of cardiovascular related in-hospital mortality (6% vs 3.8%; OR 1.17; 95%CI 0.70-1.97) or short-term mortality at 120-180 days (23.0% vs 12.5%; OR 1.34; 95%CI 0.63-2.85).

## Discussion

To our knowledge, this is the most comprehensive systematic review and meta-analysis of contemporary studies comparing T2MI with T1MI in the troponin era, comprising 131,000 patients from 41 cohort studies across 14 countries, and which used formal definitions of T2MI and T1MI. Up to three quarters of all myocardial infarctions in routine care can be T2MI (34, 35), and distinguishing T2MI from T1MI on clinical criteria is often challenging. The management strategies used by clinicians in real-world practice for T2MI often vary, and the clinical outcomes of T2MI compared to T1MI, particularly over the long term, have been uncertain. This review provides information that helps characterise these two groups of patients according to multiple variables and which may assist in clinical decision-making and prognostication.

In this review, T2MI patients demonstrated more medical comorbidities than T1MI patients, as noted in a recent meta-analysis (6). Our review highlighted the much higher incidence of pre-existing generalised vascular disease, atrial fibrillation, renal impairment, and heart failure among T2MI patients.

Sepsis (10, 17, 28) and anaemia (52) ranked highly as triggers, together with other acute cardiac events such as valve dysfunction or arrhythmias. In one study, a more favourable prognosis in T2MI was seen when the principal trigger was arrhythmia compared to non-cardiac surgery, hypotension, anaemia or hypoxia (30). In another study, shock syndromes were triggers portending a worse prognosis compared to all other triggers (33). In our analysis, non-cardiac surgery as a trigger was less frequent than reported by other investigators (27) whereby peri-operative stressors including blood loss, anaesthesia induced hypotension and wound infections cause imbalance in myocardial contractility, oxygen demand and blood flow (54).

Analysis of cTn levels showed uniformly higher values in T1MI than T2MI which accord with one review (5) reporting cTn values 30% to 94% higher in patients with T1MI, and which other investigators regard as being highly specific diagnostic markers for T1MI (54).

Coronary angiography and revascularisation were both performed much less frequently in T2MI than in T1MI patients. Treating physicians may perceive invasive strategies as being contraindicated or potentially harmful in the presence of various co-morbidities more commonly seen in T2MI and associated with competing mortality risk. In our pooled data, only one in three T2MI patients who underwent angiography demonstrated obstructive coronary artery disease, although this figure may be an underestimate due to selection bias whereby younger, less multi-morbid patients preferentially underwent angiography. In the CASABLANCA cohort study, which enrolled patients with high likelihood of coronary or peripheral artery disease and subjected them to peripheral or coronary angiography, of all those who subsequently suffered incident T2MI, almost half (47.7%) demonstrated  $\geq 70\%$  stenosis in at least 2 major coronary arteries (55). These conflicting findings question whether patients presenting with T2MI would benefit from routine use of invasive strategies that define coronary anatomy and, if plaque rupture or critical stenoses are seen, prompt revascularisation, with resultant improvement in patient outcomes. In one study (19), angiography unmasked acute plaque rupture in 29% of patients classified as T2MI. In another study, among 27 of 236 patients with T2MI who underwent revascularisation, the odds of all-cause death were reduced by 67% compared to the remaining 209 non-revascularised patients (24). In contrast, in a third more

1  
2  
3 rigorous study comparing T2MI versus T1MI patients who received or did not receive PCI within 24  
4 hours of symptom onset, after adjusting results using multivariate logistic regression analysis and  
5 inverted probability weighting,(15) in-hospital mortality was lower in those with T1MI receiving PCI  
6 (OR 0.47; 95% CI 0.40–0.55;  $p < 0.001$ ), but not in those with T2MI receiving PCI (OR 1.09; 95% CI  
7 0.62–1.94;  $p = 0.763$ ). However, all these studies are observational, so completion of randomised  
8 trials, such as the Appropriateness of Coronary investigation in myocardial injury and Type 2  
9 myocardial infarction (ACT-2) trial, which is currently in recruitment (54), will hopefully provide a  
10 more definitive answer.  
11  
12  
13

14  
15 Given that a third of T2MI patients had pre-existing coronary artery disease and most of the  
16 remainder had one or more cardiovascular risk factors, the relative underuse of cardioprotective  
17 medications is perplexing. It may reflect either clinician uncertainty around their cardioprotective  
18 utility in T2MI, or concerns about the potential for adverse interactions with other drugs or diseases  
19 commonly seen in multi-morbid T2MI patients. The higher use of diuretics in the T2MI population  
20 likely reflects the higher prevalence of heart failure and hypertension. Recognizing the  
21 heterogeneous mechanisms or conditions leading to T2MI, a phenotype specific-approach to the  
22 design of future trials will be useful in identifying effective therapies.  
23  
24  
25

26 An important finding is the much higher all-cause in-hospital and one-year mortality in T2MI  
27 compared to T1MI patients, similar to the two-fold greater mortality rate in T2MI noted in a recent  
28 systematic review of 9 studies (8). In our review, this excess mortality was not driven by an excess of  
29 cardiovascular deaths, and likely reflects the competing risks of multiple co-morbidities, rather than  
30 underlying obstructive coronary artery disease which was seen in 30-50% of T2MI patients (27, 32).  
31 Studies yielded mixed results as to whether coronary artery disease is an independent predictor of  
32 T2MI (21, 43), while others question the angiographic distinction between T2MI and T1MI. For  
33 example, in a study of 450 consecutive patients with MI who all underwent coronary angiography  
34 within 24 hours of symptom onset, 145 (32.2%) patients had 'true' T1MI (acute atherothrombosis  
35 and no systemic triggers), 114 (25.3%) had 'true' T2MI (no atherothrombosis and systemic triggers),  
36 61 (13.6%) patients had neither, and 130 (28.9%) patients had both (41). This yields a discordance of  
37 angiographic and clinical definitions of MI type in 42.5% of patients.  
38  
39  
40  
41  
42

43 Our review has several limitations. First, in the absence of individual patient data from all included  
44 studies, we could not perform multivariate regression analysis in identifying weighted predictors of  
45 diagnosis, management, or prognosis of T2MI. Second, we did not perform separate analyses of  
46 studies according to each version of the Universal Definition of MI or to different troponin  
47 thresholds to define MI, which may impact management and prognosis. However, potential  
48 misclassification bias was addressed in a recent study which showed little change in MI classification  
49 as type 1 or 2 in the same cohort of emergency admissions to whom the 3<sup>rd</sup> and 4<sup>th</sup> universal  
50 definitions were applied.(56) In another study which compared separate T2MI cohorts, as defined by  
51 the 2007 and the 2012 definitions, co-morbidities and use of cardioprotective medications were less  
52 frequent in the 2012 cohort, likely due to less severe MIs being included as a result of using more  
53 sensitive troponin assays (23). Third, we did not collect haemodynamic variables or other  
54 physiological measures such as haemoglobin levels and glomerular filtration rate in analysing clinical  
55 presentations as these were very inconsistently reported. Fourth, our mortality meta-analyses relied  
56 on crude mortality rates reported in each study, with 56% of studies (15-20, 23-29, 31, 32, 35, 36,  
57  
58  
59  
60

1  
2  
3 38, 41-43, 46, 47) also undertaking multivariate regression and/or competing risk analyses and  
4 reporting adjusted mortality rates. For the T2MI cohorts in general, these rates tended to be lower  
5 and the differences in rates compared to those of T1MI were of smaller magnitude. Fifth, we did not  
6 analyse 30-day readmission rates as these were reported in only three studies (13, 14, 24). Sixth, we  
7 did not perform sensitivity analyses comparing results of prospective versus retrospective studies, as  
8 neither group demonstrated less or more risk of bias than the other, or compare results of good  
9 quality studies against fair/poor quality studies as the latter comprised only 16.7% (22,001/131,823)  
10 of all patients. Finally, we did not attempt sub-analyses based on risk stratification using validated  
11 risk scores or seek to identify predictive models for mortality, as such analyses were reported in only  
12 two studies (27, 41).  
13  
14  
15  
16

17 The strengths of this review are the inclusion of all contemporary cohort studies in the troponin era  
18 that employed formal definitions of T2MI, analysis of a broader range of variables than those of  
19 previous studies, and the more precise discernment of clinically meaningful differences between the  
20 two MI populations in patient characteristics, clinical presentation, patterns of care and outcomes.  
21 We are aware of a large US cohort study published since completion of our review (57) which  
22 compared T1MI with T2MI patients, but was limited by misclassification bias (relying on  
23 administrative hospital discharge data containing an International Classification of Diseases-10th  
24 Revision code specific for type 2 MI, rather than a registry or chart diagnosis based on a formal MI  
25 definition), short study period of 3 months in late 2017, and inability to analyse clinical features,  
26 investigation results, medication use, coronary anatomy, and post-discharge mortality due to their  
27 omission in the datasets.  
28  
29  
30  
31  
32

## 33 Conclusion

34 This review has identified differences between T2MI and T1MI patients in presenting clinical  
35 features, investigation and management profiles, and clinical outcomes. These findings may assist  
36 clinicians to better recognise T2MI and advise patients about its sequelae, and inform hospital  
37 coding and epidemiological trending, quality of care indicators and inter-hospital benchmarking of  
38 performance relating to the care of patients with T2MI.  
39  
40  
41

42 The review has also defined persisting gaps in our understanding of the utility and prognostic effects  
43 of invasive investigations, revascularization strategies and cardioprotective medications in T2MI  
44 patients that warrant more randomised trials that enrol such patients.  
45  
46  
47  
48  
49  
50  
51  
52  
53  
54  
55  
56  
57  
58  
59  
60

## Tables

**Table 1. Pre-existing medical conditions in patients with T2MI versus T1MI.**

| Pre-existing medical condition | T2MI                                            |                          |       | T1MI                                            |                          |       | Odds ratio* (95% CI) |
|--------------------------------|-------------------------------------------------|--------------------------|-------|-------------------------------------------------|--------------------------|-------|----------------------|
|                                | Number of patients with the specified condition | Total number of patients | %     | Number of patients with the specified condition | Total number of patients | %     |                      |
| CAD                            | 3915                                            | 11706                    | 33.4% | 27538                                           | 110213                   | 25.0% | 1.13 [0.96, 1.32]    |
| Type 2 DM                      | 3420                                            | 13560                    | 25.2% | 27169                                           | 110833                   | 24.5% | 0.98 [0.86, 1.10]    |
| HTN                            | 8296                                            | 12424                    | 66.8% | 64648                                           | 105505                   | 61.3% | 1.22 [1.05, 1.43]    |
| Dyslipidaemia                  | 4626                                            | 10652                    | 43.4% | 40099                                           | 87366                    | 45.9% | 0.74 [0.58, 0.94]    |
| Smoker                         | 4213                                            | 11332                    | 37.2% | 49796                                           | 92377                    | 53.9% | 0.61 [0.50, 0.74]    |
| Obesity                        | 1225                                            | 3672                     | 33.4% | 30963                                           | 56970                    | 54.3% | 0.63 [0.46, 0.87]    |
| Renal failure                  | 2002                                            | 7443                     | 26.9% | 15969                                           | 82882                    | 19.3% | 1.89 [1.59, 2.25]    |
| Heart failure                  | 1949                                            | 10276                    | 19.0% | 7471                                            | 91700                    | 8.1%  | 2.34 [1.87, 2.93]    |
| PVD                            | 584                                             | 5856                     | 10.0% | 2066                                            | 41280                    | 5.0%  | 1.33 [1.05, 1.69]    |
| CVD                            | 1164                                            | 9941                     | 11.7% | 7669                                            | 105310                   | 7.3%  | 1.48 [1.30, 1.69]    |
| Atrial fibrillation            | 836                                             | 3645                     | 22.9% | 1220                                            | 19843                    | 6.1%  | 3.02 [2.29, 3.99]    |
| COPD                           | 800                                             | 5018                     | 15.9% | 823                                             | 48375                    | 1.7%  | 1.94 [1.22, 3.08]    |
| Illicit drug Use               | 46                                              | 204                      | 22.5% | 8                                               | 220                      | 3.6%  | 8.15 [1.03, 64.46]   |

\*Comparing T2MI with T1MI patients, with odds ratio adjusted according to study weighting using random effects meta-analysis  
Abbreviations: CAD= coronary heart disease, DM= diabetes mellitus, HTN= hypertension, BMI= body mass index, PVD= peripheral vascular disease, CVD= cerebrovascular disease, COPD= chronic obstructive pulmonary disease

Table 2. Pharmacological management and invasive interventions in patients with T2MI versus T1MI.

| Intervention                                                                                                                                                                                                                                                               | T2MI                                |                          |       | T1MI                                |                          |       | Odds ratio*<br>(95% CI) |
|----------------------------------------------------------------------------------------------------------------------------------------------------------------------------------------------------------------------------------------------------------------------------|-------------------------------------|--------------------------|-------|-------------------------------------|--------------------------|-------|-------------------------|
|                                                                                                                                                                                                                                                                            | No. patients receiving intervention | Total number of patients | %     | No. patients receiving intervention | Total number of patients | %     |                         |
| <b>Medication</b>                                                                                                                                                                                                                                                          |                                     |                          |       |                                     |                          |       |                         |
| Beta blockers                                                                                                                                                                                                                                                              | 6113                                | 9926                     | 61.6% | 78733                               | 100645                   | 78.2% | 0.46 [0.34, 0.62]       |
| ACEI / ARB                                                                                                                                                                                                                                                                 | 4692                                | 9245                     | 50.8% | 69684                               | 99281                    | 70.2% | 0.52 [0.41, 0.66]       |
| Anti-platelets                                                                                                                                                                                                                                                             | 5742                                | 10002                    | 57.4% | 88612                               | 101492                   | 87.3% | 0.24 [0.17, 0.36]       |
| Anti-coagulants                                                                                                                                                                                                                                                            | 1738                                | 6658                     | 26.1% | 17048                               | 79903                    | 21.3% | 1.90 [1.17, 3.10]       |
| Anti-anginal agents                                                                                                                                                                                                                                                        | 2322                                | 3594                     | 64.6% | 55149                               | 60256                    | 91.5% | 0.51 [0.26, 1.00]       |
| Diuretics                                                                                                                                                                                                                                                                  | 2042                                | 4388                     | 46.5% | 11877                               | 63267                    | 18.8% | 1.99 [1.56, 2.53]       |
| Statins                                                                                                                                                                                                                                                                    | 4344                                | 7858                     | 55.3% | 71915                               | 82430                    | 87.2% | 0.25 [0.17, 0.36]       |
| <b>Invasive</b>                                                                                                                                                                                                                                                            |                                     |                          |       |                                     |                          |       |                         |
| PCI                                                                                                                                                                                                                                                                        | 2267                                | 11339                    | 20.0% | 78009                               | 103913                   | 75.1% | 0.06 [0.04, 0.10]       |
| CABG                                                                                                                                                                                                                                                                       | 117                                 | 4854                     | 2.4%  | 4010                                | 66219                    | 6.1%  | 0.23 [0.12, 0.42]       |
| *Comparing T2MI with T1MI patients, with odds ratio adjusted according to study weighting using random effects meta-analysis                                                                                                                                               |                                     |                          |       |                                     |                          |       |                         |
| Abbreviations: ACEI= Angiotensin converting enzyme inhibitors, ARB= Angiotensin receptor blockers; CI=confidence interval; T2MI=type 2 myocardial infarction; T1MI=type 1 myocardial infarction; PCI=percutaneous coronary intervention; CABG=coronary artery bypass graft |                                     |                          |       |                                     |                          |       |                         |

**Table 3. Outcomes in patients with T2MI versus T1MI.**

| Outcomes                        | T2MI                      |                          |       | T1MI                      |                          |       | Odds ratio*<br>(95% CI) |
|---------------------------------|---------------------------|--------------------------|-------|---------------------------|--------------------------|-------|-------------------------|
|                                 | No. patients with outcome | Total number of patients | %     | No. patients with outcome | Total number of patients | %     |                         |
| CV in-hospital mortality        | 212                       | 3512                     | 6.0%  | 891                       | 23736                    | 3.8%  | 1.17 [0.70, 1.97]       |
| All-cause in-hospital mortality | 667                       | 5321                     | 12.5% | 1508                      | 25997                    | 5.8%  | 1.94 [1.35, 2.79]       |
| Short-term all-cause mortality  | 204                       | 887                      | 23.0% | 250                       | 1998                     | 12.5% | 1.34 [0.63, 2.85]       |
| 1-year all-cause mortality      | 979                       | 4743                     | 20.6% | 3660                      | 41691                    | 8.8%  | 2.94 [2.07, 4.17]       |
| 2-year all-cause mortality      | 246                       | 926                      | 26.6% | 428                       | 2587                     | 16.5% | 1.63 [1.11, 2.41]       |
| 3-year all-cause mortality      | 193                       | 525                      | 36.8% | 710                       | 4305                     | 16.5% | 2.00 [1.07, 3.76]       |
| Long-term all-cause mortality   | 1453                      | 2708                     | 53.7% | 1320                      | 4633                     | 28.5% | 3.24 [2.73, 3.84]       |

\*Comparing T1MI with T2MI patients, with odds ratio adjusted according to study weighting using random effects meta-analysis  
Abbreviations: CV= Cardiovascular, MACE= Major adverse cardiovascular events; T2MI=type 2 myocardial infarction; T1MI=type 1 myocardial infarction; CI=confidence interval

## Figures

Figure 1. Forest plot of one-year all-cause mortality of T2MI patients compared to T1MI patients.

Figure 2. Forest plot of long-term all-cause mortality of T2MI patients compared to T1MI patients.

Figure S1. PRISMA flow diagram.

Figure S2. Forest Plot. Presence of Ischaemic Heart Disease.

Figure S3. Forest Plot. Presence of Type 2 Diabetes Mellitus.

Figure S4. Forest Plot. Presence of Hypertension.

Figure S5. Forest Plot. Presence of Dyslipidaemia.

Figure S6. Forest Plot. Smoking Status.

Figure S7. Forest Plot. Obesity Status.

Figure S8. Forest Plot. Presence of Chronic Kidney Disease.



1  
2  
3 Figure S9. Forest Plot. Presence of Heart Failure.  
4  
5 Figure S10. Forest Plot. Presence of Peripheral Vascular Disease.  
6  
7 Figure S11. Forest Plot. Presence of Cerebrovascular Disease.  
8  
9 Figure S12. Forest Plot. Presence of Illicit Drug Use.  
10  
11 Figure S13. Forest Plot. Presence of Atrial Fibrillation.  
12  
13 Figure S14. Forest Plot. Chest Pain as Presenting Feature.  
14  
15 Figure S15. Forest Plot. Dyspnoea as Presenting Feature.  
16  
17 Figure S16. Forest Plot. Arm / Shoulder Discomfort as Presenting Feature.  
18  
19 Figure S17. Forest Plot. Nausea / Vomiting as Presenting Feature.  
20  
21 Figure S18. Forest Plot. Non-specific Symptoms as Presenting Features.  
22  
23 Figure S19. Forest Plot. Collapse / Syncope as Presenting Features.  
24  
25 Figure S20. Forest Plot. ST Elevation on ECG.  
26  
27 Figure S21. Forest Plot. ST Depression or T Wave Inversion on ECG.  
28  
29 Figure S22. Forest Plot. Q Waves on ECG.  
30  
31 Figure S23. Forest Plot. Non-specific ST Changes on ECG.  
32  
33 Figure S24. Forest Plot. Left Bundle Branch Block on ECG.  
34  
35 Figure S25. Forest Plot. Atrial Fibrillation on ECG.  
36  
37 Figure S26. Forest Plot. Coronary Angiogram Performed.  
38  
39 Figure S27. Forest Plot. Obstructive Coronary Artery Disease on Coronary Angiogram.  
40  
41 Figure S28. Forest Plot. Multivessel Disease on Coronary Angiogram.  
42  
43 Figure S29. Forest Plot. Echocardiogram Performed.  
44  
45 Figure S30. Forest Plot. Regional Wall Motion Abnormalities on Echocardiogram.  
46  
47 Figure S31. Forest Plot. Beta-Blockers Prescribed.  
48  
49 Figure S32. Forest Plot. ACEi/ARB Prescribed.  
50  
51 Figure S33. Forest Plot. Antiplatelets Prescribed.  
52  
53 Figure S34. Forest Plot. Anticoagulants Prescribed.  
54  
55 Figure S35. Forest Plot. Antianginal Drugs Prescribed.  
56  
57 Figure S36. Forest Plot. Diuretics Prescribed.  
58  
59 Figure S37. Forest Plot. Statins Prescribed.  
60  
61 Figure S37. Forest Plot. Statins Prescribed.

1  
2  
3 Figure S38. Forest Plot. Percutaneous Coronary Intervention Performed.  
4

### 5 Contribution Statement

6  
7 All authors (KW, MK, IS) contributed to the conception of the work. MK and KW performed the  
8 acquisition and analysis of the data. KW and IS were responsible for the interpretation of data. All  
9 authors (MK, KW, IS) were responsible for drafting manuscript and final approval of the version to be  
10 published. All authors (KW, MK, IS) agree to be accountable for all aspects of the work in ensuring  
11 that questions related to the accuracy or integrity of any part of the work are appropriately  
12 investigated and resolved.  
13

### 14 Competing Interests

15  
16 The authors declare there are no conflict of interest with respect the article.  
17

### 18 Funding

19  
20 This research received no specific grant from any funding agency in the public, commercial or not-  
21 for-profit sectors.  
22

### 23 Data Sharing Statement

24  
25 All data relevant to the study are included in the article or uploaded as supplementary information.  
26

### 27 Ethic Approval Statement

28  
29 No ethics approval was sought for this research project as no patient data was used.  
30  
31  
32  
33  
34  
35  
36  
37  
38  
39  
40  
41  
42  
43  
44  
45  
46  
47  
48  
49  
50  
51  
52  
53  
54  
55  
56  
57  
58  
59  
60

## References

1. Thygesen K, Alpert JS, White HD, Jaffe AS, Apple FS, Galvani M, et al. Universal definition of myocardial infarction. *Circulation*. 2007;116(22):2634-53.
2. Thygesen K, Alpert JS, Jaffe AS, Simoons ML, Chaitman BR, White HD, et al. Third universal definition of myocardial infarction. *Circulation*. 2012;126(16):2020-35.
3. Thygesen K, Alpert JS, Jaffe AS, Chaitman BR, Bax JJ, Morrow DA, et al. Fourth Universal Definition of Myocardial Infarction (2018). *J Am Coll Cardiol*. 2018;72(18):2231-64.
4. Lippi G, Sanchis-Gomar F, Cervellin G. Chest pain, dyspnea and other symptoms in patients with type 1 and 2 myocardial infarction. A literature review. *International journal of cardiology*. 2016;215:20-2.
5. Lippi G, Sanchis-Gomar F, Cervellin G. Cardiac troponins and mortality in type 1 and 2 myocardial infarction. *Clinical chemistry and laboratory medicine*. 2017;55(2):181-8.
6. Gupta S, Vaidya SR, Arora S, Bahekar A, Devarapally SR. Type 2 versus type 1 myocardial infarction: a comparison of clinical characteristics and outcomes with a meta-analysis of observational studies. *Cardiovasc Diagn Ther*. 2017;7(4):348-58.
7. Reid C, Alturki A, Yan A, So D, Ko D, Tanguay JF, et al. Meta-analysis Comparing Outcomes of Type 2 Myocardial Infarction and Type 1 Myocardial Infarction With a Focus on Dual Antiplatelet Therapy. *CJC Open*. 2020;2(3):118-28.
8. Wang G, Zhao N, Zhong S, Li J. A systematic review on the triggers and clinical features of type 2 myocardial infarction. *Clin Cardiol*. 2019;42(10):1019-27.
9. Moher D, Liberati A, Tetzlaff J, Altman DG. Preferred reporting items for systematic reviews and meta-analyses: the PRISMA statement. *PLoS medicine*. 2009;6(7):e1000097.
10. Riley RD, Higgins JP, Deeks JJ. Interpretation of random effects meta-analyses. *BMJ*. 2011;342:d549.
11. Stang A. Critical evaluation of the Newcastle-Ottawa scale for the assessment of the quality of nonrandomized studies in meta-analyses. *Eur J Epidemiol*. 2010;25(9):603-5.
12. GA Wells BS, D O'Connell, J Peterson, V Welch, M Losos, P Tugwell. The Newcastle-Ottawa Scale (NOS) for assessing the quality of nonrandomised studies in meta-analyses: Ottawa Hospital Research Institute; 2011 [Available from: [http://www.ohri.ca/programs/clinical\\_epidemiology/oxford.asp](http://www.ohri.ca/programs/clinical_epidemiology/oxford.asp)].
13. Arora S, Strassle PD, Qamar A, Wheeler EN, Levine AL, Misenheimer JA, et al. Impact of Type 2 Myocardial Infarction (MI) on Hospital-Level MI Outcomes: Implications for Quality and Public Reporting. *Journal of the American Heart Association*. 2018;7(7).
14. Balanescu DV, Donisan T, Deswal A, Palaskas N, Song J, Lopez-Mattei J, et al. Acute myocardial infarction in a high-risk cancer population: Outcomes following conservative versus invasive management. *International journal of cardiology*. 2020;313:1-8.
15. Baron T, Hambraeus K, Sundstrom J, Erlinge D, Jernberg T, Lindahl B. Type 2 myocardial infarction in clinical practice. *Heart (British Cardiac Society)*. 2015;101(2):101-6.
16. Baron T, Hambraeus K, Sundstrom J, Erlinge D, Jernberg T, Lindahl B. Impact on Long-Term Mortality of Presence of Obstructive Coronary Artery Disease and Classification of Myocardial Infarction. *Am J Med*. 2016;129(4):398-406.
17. Bonaca MP, Wiviott SD, Braunwald E, Murphy SA, Ruff CT, Antman EM, et al. American College of Cardiology/American Heart Association/European Society of Cardiology/World Heart Federation universal definition of myocardial infarction classification system and the risk of cardiovascular death: observations from the TRITON-TIMI 38 trial (Trial to Assess Improvement in Therapeutic Outcomes by Optimizing Platelet Inhibition With Prasugrel-Thrombolysis in Myocardial Infarction 38). *Circulation*. 2012;125(4):577-83.
18. Cediell G, Gonzalez-Del-Hoyo M, Carrasquer A, Sanchez R, Boqué C, Bardají A. Outcomes with type 2 myocardial infarction compared with non-ischaemic myocardial injury. *Heart (British Cardiac Society)*. 2017;103(8):616-22.

19. Chapman AR, Adamson PD, Shah ASV, Anand A, Strachan FE, Ferry AV, et al. High-Sensitivity Cardiac Troponin and the Universal Definition of Myocardial Infarction. *Circulation*. 2020;141(3):161-71.
20. Chapman AR, Shah ASV, Lee KK, Anand A, Francis O, Adamson P, et al. Long-Term Outcomes in Patients With Type 2 Myocardial Infarction and Myocardial Injury. *Circulation*. 2018;137(12):1236-45.
21. Consuegra-Sánchez L, Martínez-Díaz JJ, de Guadiana-Romualdo LG, Wasniewski S, Esteban-Torrella P, Clavel-Ruipérez FG, et al. No additional value of conventional and high-sensitivity cardiac troponin over clinical scoring systems in the differential diagnosis of type 1 vs. type 2 myocardial infarction. *Clinical chemistry and laboratory medicine*. 2018;56(5):857-64.
22. El-Haddad H, Robinson E, Swett K, Wells GL. Prognostic implications of type 2 myocardial infarctions. 2012.
23. Etaher A, Gibbs OJ, Saad YM, Frost S, Nguyen TL, Ferguson I, et al. Type-II myocardial infarction and chronic myocardial injury rates, invasive management, and 4-year mortality among consecutive patients undergoing high-sensitivity troponin T testing in the emergency department. *European heart journal Quality of care & clinical outcomes*. 2020;6(1):41-8.
24. Furie N, Israel A, Gilad L, Neuman G, Assad F, Ben-Zvi I, et al. Type 2 myocardial infarction in general medical wards: Clinical features, treatment, and prognosis in comparison with type 1 myocardial infarction. *Medicine*. 2019;98(41):e17404.
25. Guimarães PO, Leonardi S, Huang Z, Wallentin L, de Werf FV, Aylward PE, et al. Clinical features and outcomes of patients with type 2 myocardial infarction: Insights from the Thrombin Receptor Antagonist for Clinical Event Reduction in Acute Coronary Syndrome (TRACER) trial. *Am Heart J*. 2018;196:28-35.
26. Hawatmeh A, Thawabi M, Aggarwal R, Abirami C, Vavilin I, Wasty N, et al. Implications of Misclassification of Type 2 Myocardial Infarction on Clinical Outcomes. *Cardiovascular revascularization medicine : including molecular interventions*. 2020;21(2):176-9.
27. Higuchi S, Suzuki M, Horiuchi Y, Tanaka H, Saji M, Yoshino H, et al. Higher non-cardiac mortality and lesser impact of early revascularization in patients with type 2 compared to type 1 acute myocardial infarction: results from the Tokyo CCU Network registry. *Heart Vessels*. 2019;34(7):1140-7.
28. Javed U, Aftab W, Ambrose JA, Wessel RJ, Mouanoutoua M, Huang G, et al. Frequency of elevated troponin I and diagnosis of acute myocardial infarction. *The American journal of cardiology*. 2009;104(1):9-13.
29. Kadesjö E, Roos A, Siddiqui A, Desta L, Lundbäck M, Holzmann MJ. Acute versus chronic myocardial injury and long-term outcomes. *Heart (British Cardiac Society)*. 2019;105(24):1905-12.
30. Lambrecht S, Sarkisian L, Saaby L, Poulsen TS, Gerke O, Hosbond S, et al. Different Causes of Death in Patients with Myocardial Infarction Type 1, Type 2, and Myocardial Injury. *Am J Med*. 2018;131(5):548-54.
31. Landes U, Bental T, Orvin K, Vaknin-Assa H, Rechavia E, Iakobishvili Z, et al. Type 2 myocardial infarction: A descriptive analysis and comparison with type 1 myocardial infarction. *Journal of cardiology*. 2016;67(1):51-6.
32. López-Cuenca A, Gómez-Molina M, Flores-Blanco PJ, Sánchez-Martínez M, García-Narbon A, De Las Heras-Gómez I, et al. Comparison between type-2 and type-1 myocardial infarction: clinical features, treatment strategies and outcomes. *J Geriatr Cardiol*. 2016;13(1):15-22.
33. Meigher S, Thode HC, Peacock WF, Bock JL, Gruberg L, Singer AJ. Causes of Elevated Cardiac Troponins in the Emergency Department and Their Associated Mortality. *Academic emergency medicine : official journal of the Society for Academic Emergency Medicine*. 2016;23(11):1267-73.
34. Nestelberger T, Boeddinghaus J, Badertscher P, Twerenbold R, Wildi K, Breitenbücher D, et al. Effect of Definition on Incidence and Prognosis of Type 2 Myocardial Infarction. *J Am Coll Cardiol*. 2017;70(13):1558-68.

- 1
- 2
- 3
- 4 35. Neumann JT, Sørensen NA, Rübtsamen N, Ojeda F, Renné T, Qaderi V, et al. Discrimination of
- 5 patients with type 2 myocardial infarction. *Eur Heart J*. 2017;38(47):3514-20.
- 6 36. Paiva L, Providencia R, Barra S, Dinis P, Faustino AC, Goncalves L. Universal definition of
- 7 myocardial infarction: clinical insights. *Cardiology*. 2015;131(1):13-21.
- 8 37. Pandey AK, Duong T, Swiatkiewicz I, Daniels LB. A Comparison of Biomarker Rise in Type 1
- 9 and Type 2 Myocardial Infarction. *The American journal of medicine*. 2020;133(10):1203-8.
- 10 38. Putot A, Derrida SB, Zeller M, Avondo A, Ray P, Manckoundia P, et al. Short-Term Prognosis
- 11 of Myocardial Injury, Type 1, and Type 2 Myocardial Infarction in the Emergency Unit. *Am J Med*.
- 12 2018;131(10):1209-19.
- 13 39. Putot A, Jeanmichel M, Chagué F, Avondo A, Ray P, Manckoundia P, et al. Type 1 or type 2
- 14 myocardial infarction in patients with a history of coronary artery disease: Data from the emergency
- 15 department. *Journal of Clinical Medicine*. 2019;8(12).
- 16 40. Putot A, Jeanmichel M, Chague F, Manckoundia P, Cottin Y, Zeller M. Type 2 Myocardial
- 17 Infarction: A Geriatric Population-based Model of Pathogenesis. *Aging and disease*. 2020;11(1):108-
- 18 17.
- 19 41. Radovanovic D, Pilgrim T, Seifert B, Urban P, Pedrazzini G, Erne P. Type 2 myocardial
- 20 infarction: incidence, presentation, treatment and outcome in routine clinical practice. *Journal of*
- 21 *cardiovascular medicine (Hagerstown, Md)*. 2017;18(5):341-7.
- 22 42. Raphael CE, Roger VL, Sandoval Y, Singh M, Bell M, Lerman A, et al. Incidence, Trends, and
- 23 Outcomes of Type 2 Myocardial Infarction in a Community Cohort. *Circulation*. 2020;141(6):454-63.
- 24 43. Reed GW, Horr S, Young L, Clevenger J, Malik U, Ellis SG, et al. Associations Between Cardiac
- 25 Troponin, Mechanism of Myocardial Injury, and Long-Term Mortality After Noncardiac Vascular
- 26 Surgery. *Journal of the American Heart Association*. 2017;6(6).
- 27 44. Saaby L, Poulsen TS, Diederichsen AC, Hosbond S, Larsen TB, Schmidt H, et al. Mortality rate
- 28 in type 2 myocardial infarction: observations from an unselected hospital cohort. *Am J Med*.
- 29 2014;127(4):295-302.
- 30 45. Saaby L, Poulsen TS, Hosbond S, Larsen TB, Pyndt Diederichsen AC, Hallas J, et al.
- 31 Classification of myocardial infarction: frequency and features of type 2 myocardial infarction. *Am J*
- 32 *Med*. 2013;126(9):789-97.
- 33 46. Sandoval Y, Smith SW, Sexter A, Thordsen SE, Bruen CA, Carlson MD, et al. Type 1 and 2
- 34 Myocardial Infarction and Myocardial Injury: Clinical Transition to High-Sensitivity Cardiac Troponin I.
- 35 *Am J Med*. 2017;130(12):1431-9.e4.
- 36 47. Sandoval Y, Thordsen SE, Smith SW, Schulz KM, Murakami MM, Pearce LA, et al. Cardiac
- 37 troponin changes to distinguish type 1 and type 2 myocardial infarction and 180-day mortality risk.
- 38 *European heart journal Acute cardiovascular care*. 2014;3(4):317-25.
- 39 48. Sato R, Sakamoto K, Kaikita K, Tsujita K, Nakao K, Ozaki Y, et al. Long-Term Prognosis of
- 40 Patients with Myocardial Infarction Type 1 and Type 2 with and without Involvement of Coronary
- 41 Vasospasm. *Journal of clinical medicine*. 2020;9(6).
- 42 49. Shah AS, McAllister DA, Mills R, Lee KK, Churchhouse AM, Fleming KM, et al. Sensitive
- 43 troponin assay and the classification of myocardial infarction. *Am J Med*. 2015;128(5):493-501.e3.
- 44 50. Singh A, Gupta A, DeFilippis EM, Qamar A, Biery DW, Almarzooq Z, et al. Cardiovascular
- 45 Mortality After Type 1 and Type 2 Myocardial Infarction in Young Adults. *Journal of the American*
- 46 *College of Cardiology*. 2020;75(9):1003-13.
- 47 51. Smilowitz NR, Subramanyam P, Gianos E, Reynolds HR, Shah B, Sedlis SP. Treatment and
- 48 outcomes of type 2 myocardial infarction and myocardial injury compared with type 1 myocardial
- 49 infarction. *Coronary artery disease*. 2018;29(1):46-52.
- 50 52. Stein GY, Herscovici G, Korenfeld R, Matetzky S, Gottlieb S, Alon D, et al. Type-II myocardial
- 51 infarction--patient characteristics, management and outcomes. *PLoS One*. 2014;9(1):e84285.
- 52 53. Truong HH, Victor MV, Imad MA, Kobalava ZD, Parvathy UT, Al-Zakwani I. Mortality and
- 53 morbidity associated with type 2 myocardial infarction: A single-center study. *Annals of Clinical*
- 54 *Cardiology*. 2020;2(2):70-9.
- 55
- 56
- 57
- 58
- 59
- 60

- 1  
2  
3 54. Alpert JS, Thygesen KA, White HD, Jaffe AS. Diagnostic and therapeutic implications of type 2  
4 myocardial infarction: review and commentary. *Am J Med.* 2014;127(2):105-8.  
5  
6 55. Gaggin HK, Liu Y, Lyass A, van Kimmenade RR, Motiwala SR, Kelly NP, et al. Incident Type 2  
7 Myocardial Infarction in a Cohort of Patients Undergoing Coronary or Peripheral Arterial  
8 Angiography. *Circulation.* 2017;135(2):116-27.  
9  
10  
11  
12  
13  
14  
15  
16  
17  
18  
19  
20  
21  
22  
23  
24  
25  
26  
27  
28  
29  
30  
31  
32  
33  
34  
35  
36  
37  
38  
39  
40  
41  
42  
43  
44  
45  
46  
47  
48  
49  
50  
51  
52  
53  
54  
55  
56  
57  
58  
59  
60

For peer review only

1  
2  
3  
4  
5  
6  
7  
8  
9  
10  
11  
12  
13  
14  
15  
16  
17  
18  
19  
20  
21  
22  
23  
24  
25  
26  
27  
28  
29  
30  
31  
32  
33  
34  
35  
36  
37  
38  
39  
40  
41  
42  
43  
44  
45  
46

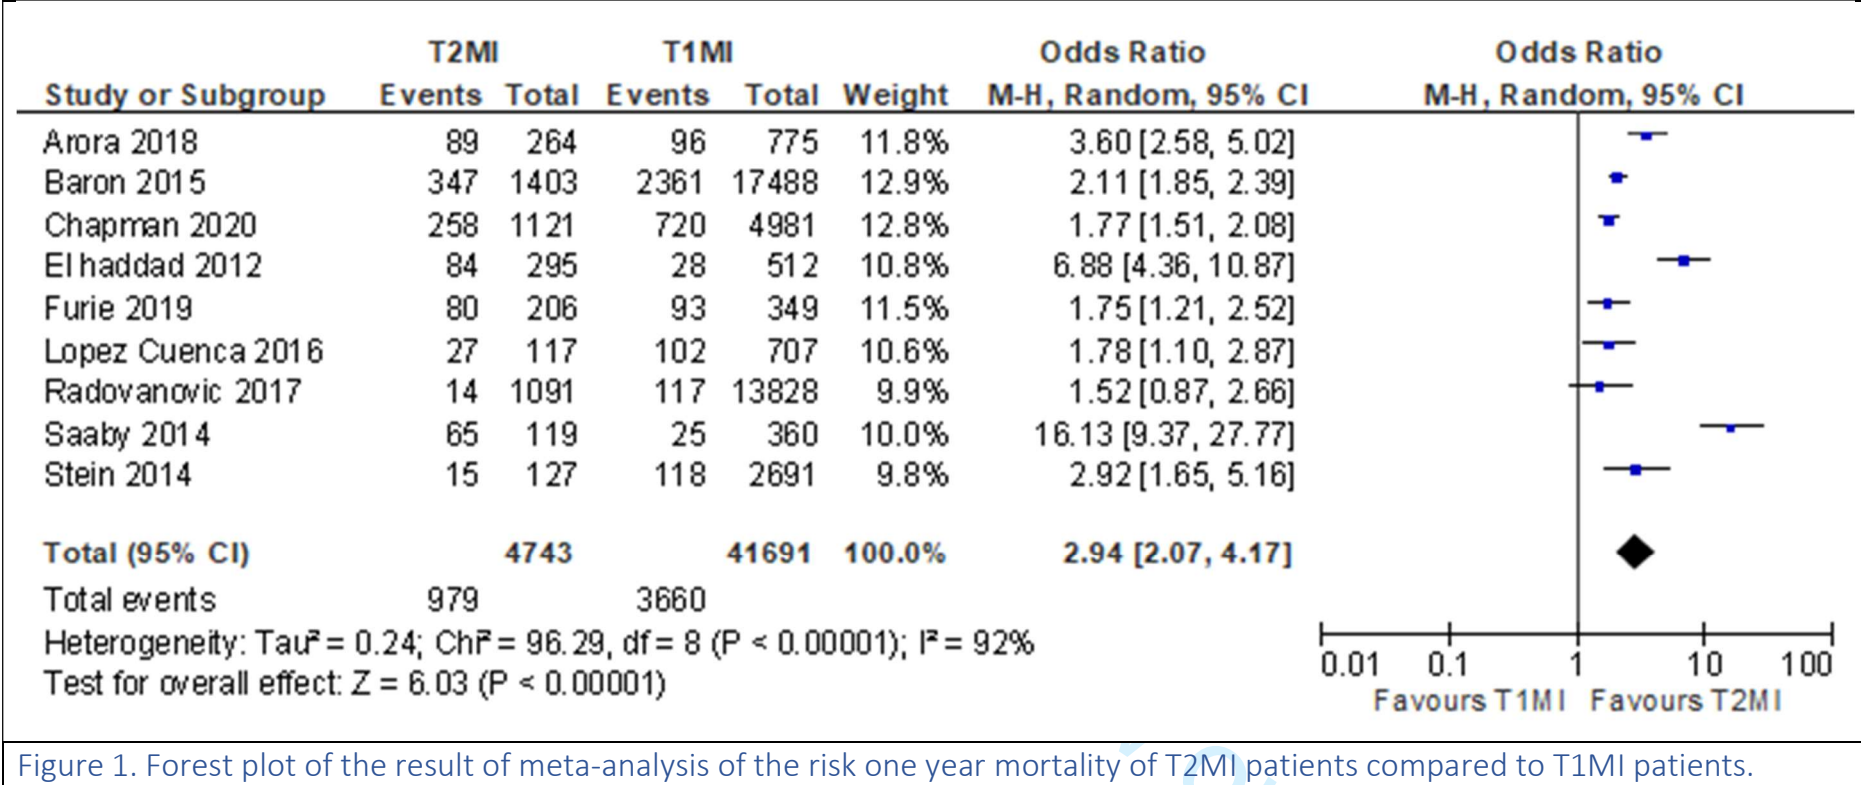

Figure 1. Forest plot of the result of meta-analysis of the risk one year mortality of T2MI patients compared to T1MI patients.

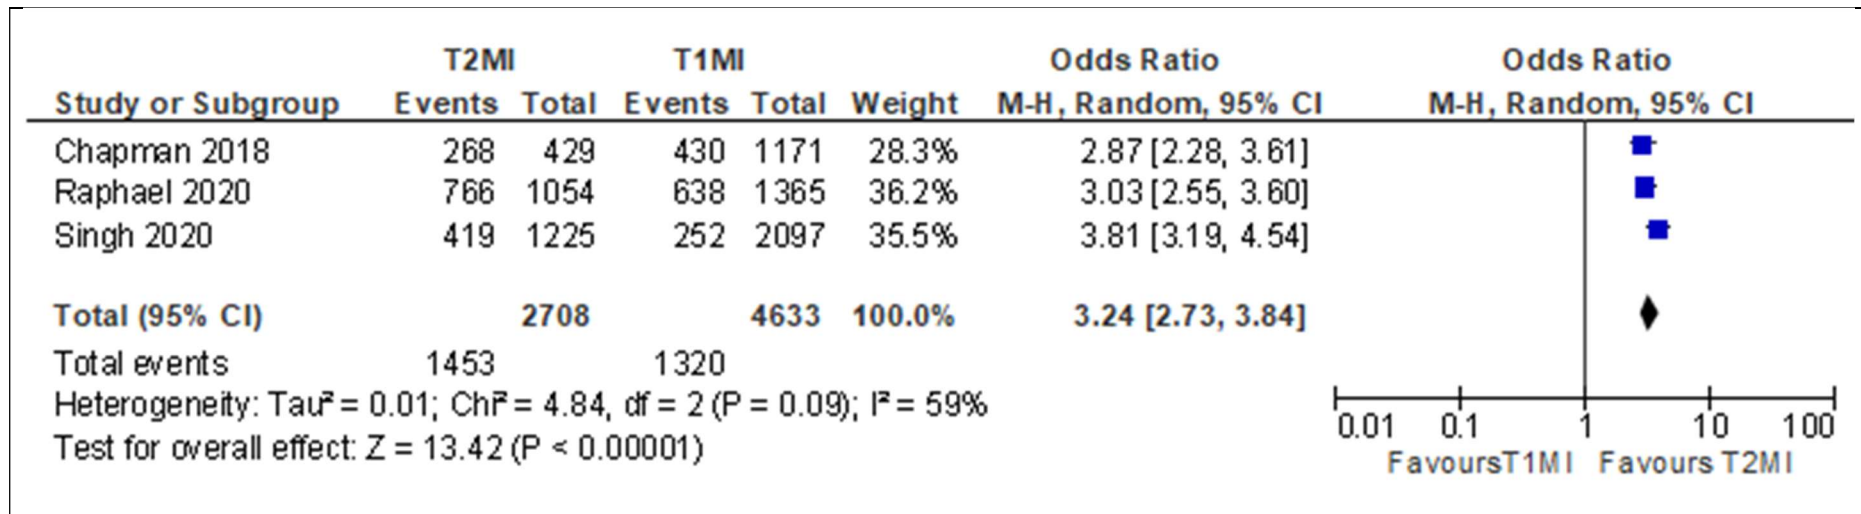

Figure 2. Forest plot of the result of meta-analysis of the risk long-term mortality of T2MI patients compared to T1MI patients.

Review only



Table S1. Evolving definitions of Type 2 Myocardial Infarction.

| Year | Universal Definition of Type 2 Myocardial Infarction                                                                                                                                                                                                                                                                                                                                                                                                                                                                                                                                             |
|------|--------------------------------------------------------------------------------------------------------------------------------------------------------------------------------------------------------------------------------------------------------------------------------------------------------------------------------------------------------------------------------------------------------------------------------------------------------------------------------------------------------------------------------------------------------------------------------------------------|
| 2007 | Myocardial infarction secondary to ischaemia due to either increased oxygen demand or decreased supply, e.g. coronary artery spasm, coronary embolism, anaemia, arrhythmias, hypotension or hypertension                                                                                                                                                                                                                                                                                                                                                                                         |
| 2012 | Instances of myocardial injury with necrosis where a condition other than coronary artery disease contributes to an imbalance between myocardial oxygen supply and/or demand e.g. coronary artery spasm, coronary embolism, anaemia, arrhythmias, hypotension or hypertension                                                                                                                                                                                                                                                                                                                    |
| 2018 | Detection of a rise and/or fall of cTn values with at least one value above the 99th percentile URL, and evidence of an imbalance between myocardial oxygen supply and demand unrelated to coronary thrombosis, requiring at least one of the following: <ul style="list-style-type: none"> <li>- Symptoms of acute myocardial ischaemia</li> <li>- New ischaemic ECG changes</li> <li>- Development of pathological Q waves</li> <li>- Imaging evidence of new loss of viable myocardium or new regional wall motion abnormality in a pattern consistent with an ischaemic aetiology</li> </ul> |

Table S2. Search strategy.

MEDLINE: (type 2 adj3 myocard\*) OR (type-2 adj3 myocard\*) OR (type II adj3 myocard\*) OR (type-II adj3 myocard\*) OR (type 2 adj3 MI) OR (type-2 adj3 MI) OR T2MI OR (supply demand adj3 myocard\*)

EMBASE: ('type 2' NEXT/3 myocard\*) OR ('type-2' NEXT/3 myocard\*) OR ('type ii' NEXT/3 myocard\*) OR ('type-ii' NEXT/3 myocard\*) OR ('type 2' NEXT/3 mi) OR ('type-2' NEXT/3 mi) OR ('t2mi') OR ('supply demand' NEXT/3 myocard\*)

Table S3a. Study characteristics

| Author, Year                | Patients |      | Design        | Definition of MI | Geographic location | Screening                                    | Troponin Assay  |
|-----------------------------|----------|------|---------------|------------------|---------------------|----------------------------------------------|-----------------|
|                             | T1MI     | T2MI |               |                  |                     |                                              |                 |
| Arora, 2018 (1)             | 775      | 264  | Retrospective | 2012             | USA                 | NSTEMI patients                              | cTnI            |
| Balanescu, 2020 (2)         | 152      | 49   | Retrospective | 2018             | USA                 | AMI patients                                 | N/A             |
| Baron, 2015 (3)             | 17488    | 1403 | Prospective   | 2007             | Sweden              | AMI patients                                 | hs-cTnT         |
| Baron, 2016 (4)             | 40501    | 1313 | Prospective   | 2007             | Sweden              | AMI patients                                 | hs-cTnT         |
| Bonaca, 2012 (5)            | 359      | 42   | Prospective   | 2007             | Multinational       | TRITON TIMI 38 trial                         | N/A             |
| Cediel, 2017 (6)            | 376      | 194  | Retrospective | 2012             | Spain               | ED patients with at least 1 troponin         | cTnI            |
| Chapman, 2018 (7)           | 1171     | 429  | Prospective   | 2012             | UK                  | ED with elevated troponin                    | cTnI            |
| Chapman, 2020 (8)           | 4981     | 1121 | Prospective   | 2018             | UK                  | Suspected ACS                                | cTnI            |
| Consuegra-Sanchaz, 2018 (9) | 125      | 75   | Retrospective | 2012             | Spain               | ED patients with at least 1 troponin         | cTnI<br>hs-cTnT |
| El-Haddad, 2012 (10)        | 512      | 295  | Retrospective | 2012             | USA                 | Patients with elevated troponin              | N/A             |
| Etaher, 2020 (11)           | 97       | 121  | Prospective   | 2018             | Australia           | Patients with elevated troponin              | N/A             |
| Furie, 2019 (12)            | 349      | 206  | Retrospective | 2012             | Israel              | NSTEMI on general ward                       | Unknown         |
| Guimaraes, 2018 (13)        | 847      | 76   | Retrospective | 2012             | Multinational       | ACS during TRACER trial                      | N/A             |
| Hawatmeh, 2020 (14)         | 664      | 281  | Retrospective | 2012             | USA                 | NSTEMI patients                              | cTnI            |
| Higuchi, 2019 (15)          | 12023    | 491  | Retrospective | 2012             | Tokyo               | Admitted to CCU                              | N/A             |
| Javed, 2009 (16)            | 143      | 64   | Retrospective | 2007             | USA                 | Patients with elevated troponin              | cTnI            |
| Kadesjo, 2019 (17)          | 1111     | 251  | Retrospective | 2018             | Sweden              | MI, Registry                                 | N/A             |
| Lambrecht, 2018 (18)        | 360      | 119  | Prospective   | 2007             | Denmark             | Hospitalised patients with troponin measured | cTnI            |
| Landes, 2016 (19)           | 107      | 107  | Retrospective | 2012             | Israel              | Diagnosed with T2MI and T1MI                 | cTnT            |
| Lopez-Cuenca, 2016 (20)     | 707      | 117  | Retrospective | 2012             | Spain               | Diagnosed with T2MI and T1MI                 | hs-cTnT         |
| Meigher, 2016 (21)          | 340      | 452  | Retrospective | 2012             | Germany             | ED patients with elevated troponin           | cTnI            |
| Nestelberger, 2017 (22)     | 684      | 128  | Prospective   | 2012             | Multinational       | ED patients with MI                          | N/A             |

|    |                                                                                                                                                                                                                                                                                             |       |      |               |      |             |                                              |         |
|----|---------------------------------------------------------------------------------------------------------------------------------------------------------------------------------------------------------------------------------------------------------------------------------------------|-------|------|---------------|------|-------------|----------------------------------------------|---------|
| 1  | Neumann, 2017 (23)                                                                                                                                                                                                                                                                          | 188   | 99   | Prospective   | 2012 | Germany     | ED patients with suspected MI                | hs-cTnI |
| 2  | Paiva, 2015 (24)                                                                                                                                                                                                                                                                            | 764   | 236  | Retrospective | 2012 | Portugal    | Admitted to CCU with MI                      | cTnI    |
| 3  | Pandey, 2020 (25)                                                                                                                                                                                                                                                                           | 97    | 103  | Prospective   | 2018 | USA         | MI                                           | N/A     |
| 4  | Putot, 2018 (26)                                                                                                                                                                                                                                                                            | 2036  | 847  | Prospective   | 2012 | France      | ED or cardiology ward with elevated troponin | cTnI    |
| 5  | Putot, 2019 (27)                                                                                                                                                                                                                                                                            | 365   | 254  | Retrospective | 2018 | France      | Hospitalised patients with CAD               | cTnI    |
| 6  | Putot, 2020 (28)                                                                                                                                                                                                                                                                            | 3710  | 862  | Retrospective | 2012 | France      | Hospitalised patients with MI                | cTnI    |
| 7  | Radovanovic, 2017 (29)                                                                                                                                                                                                                                                                      | 13828 | 1091 | Retrospective | 2012 | Switzerland | Diagnosed AMI                                | N/A     |
| 8  | Raphael, 2020 (30)                                                                                                                                                                                                                                                                          | 1365  | 1054 | Retrospective | 2018 | USA         | Raised troponin                              | cTnT    |
| 9  | Reed, 2017 (31)                                                                                                                                                                                                                                                                             | 88    | 162  | Retrospective | 2012 | USA         | Underwent vascular surgery procedure         | cTnT    |
| 10 | Saaby 2013 (32)                                                                                                                                                                                                                                                                             | 397   | 144  | Prospective   | 2007 | Denmark     | Troponin measured                            | cTnI    |
| 11 | Saaby, 2014 (33)                                                                                                                                                                                                                                                                            | 360   | 119  | Prospective   | 2007 | Denmark     | Elevated troponin                            | cTnI    |
| 12 | Sandoval, 2014 (34)                                                                                                                                                                                                                                                                         | 66    | 190  | Retrospective | 2012 | USA         | ED patients with troponin measured           | cTnI    |
| 13 | Sandoval, 2017 (35)                                                                                                                                                                                                                                                                         | 77    | 140  | Prospective   | 2012 | USA         | ED patients with troponin measured           | cTnI    |
| 14 | Sato, 2020 (36)                                                                                                                                                                                                                                                                             | 2834  | 155  | Prospective   | 2012 | Japan       | Hospitalised patient with MI                 | N/A     |
| 15 | Shah, 2015 (37)                                                                                                                                                                                                                                                                             | 1171  | 429  | Prospective   | 2012 | UK          | Admitted with elevated troponin              | cTnI    |
| 16 | Singh, 2020 (38)                                                                                                                                                                                                                                                                            | 2097  | 1225 | Retrospective | 2018 | USA         | Age <50, MI or raised troponin               | N/A     |
| 17 | Smilowitz, 2018 (39)                                                                                                                                                                                                                                                                        | 137   | 146  | Prospective   | 2012 | USA         | Admitted with raised troponin                | cTnI    |
| 18 | Stein, 2014 (40)                                                                                                                                                                                                                                                                            | 2691  | 127  | Prospective   | 2007 | Israel      | Admitted to cardiology                       | N/A     |
| 19 | Truong, 2020 (41)                                                                                                                                                                                                                                                                           | 275   | 175  | Retrospective | 2012 | Russia      | MI, undergoing angiogram                     | N/A     |
| 20 | <i>cTnI = cardiac troponin I; cTnT = cardiac troponin T; hs- = high sensitivity; AMI = acute myocardial infarction; MI = myocardial infarction; ACS = acute coronary syndrome; NSTEMI = non-ST elevation myocardial infarction; CCU = coronary care unit; CAD = coronary artery disease</i> |       |      |               |      |             |                                              |         |

Table S3b. Study characteristics

| Author, Year                | Patients |      | Variables               |          |                |                 |            |           |
|-----------------------------|----------|------|-------------------------|----------|----------------|-----------------|------------|-----------|
|                             | T1MI     | T2MI | Pre-existing conditions | Symptoms | Investigations | Troponin Values | Management | Prognosis |
| Arora, 2018 (1)             | 775      | 264  | X                       |          | X              | X               | X          | X         |
| Balanescu, 2020 (2)         | 152      | 49   |                         | X        | X              |                 | X          |           |
| Baron, 2015 (3)             | 17488    | 1403 | X                       | X        | X              | X               | X          | X         |
| Baron, 2016 (4)             | 40501    | 1313 | X                       | X        | X              | X               | X          |           |
| Bonaca, 2012 (5)            | 359      | 42   |                         |          |                |                 |            |           |
| Cediel, 2017 (6)            | 376      | 194  | X                       | X        | X              | X               |            | X         |
| Chapman, 2018 (7)           | 1171     | 429  | X                       |          | X              | X               | X          | X         |
| Chapman, 2020 (8)           | 4981     | 1121 | X                       | X        | X              | X               |            | X         |
| Consuegra-Sanchaz, 2018 (9) | 125      | 75   | X                       | X        | X              | X               |            |           |
| El-Haddad, 2012 (10)        | 512      | 295  |                         |          |                |                 |            | X         |
| Etaher, 2020 (11)           | 97       | 121  | X                       |          | X              |                 | X          |           |
| Furie, 2019 (12)            | 349      | 206  | X                       | X        | X              | X               | X          | X         |
| Guimaraes, 2018 (13)        | 847      | 76   | X                       |          | X              |                 | X          | X         |
| Hawatmeh, 2020 (14)         | 664      | 281  | X                       |          | X              | X               | X          |           |
| Higuchi, 2019 (15)          | 12023    | 491  | X                       |          | X              |                 | X          | X         |
| Javed, 2009 (16)            | 143      | 64   | X                       |          | X              | X               |            | X         |
| Kadesjo, 2019 (17)          | 1111     | 251  | X                       |          |                |                 | X          | X         |
| Lambrecht, 2018 (18)        | 360      | 119  | X                       |          | X              | X               |            | X         |
| Landes, 2016 (19)           | 107      | 107  | X                       | X        | X              | X               |            |           |
| Lopez-Cuenca, 2016 (20)     | 707      | 117  | X                       | X        | X              | X               | X          | X         |
| Meigher, 2016 (21)          | 340      | 452  | X                       | X        | X              | X               |            | X         |
| Nestelberger, 2017 (22)     | 684      | 128  | X                       |          | X              |                 | X          | X         |
| Neumann, 2017 (23)          | 188      | 99   | X                       |          | X              | X               |            | X         |
| Paiva, 2015 (24)            | 764      | 236  | X                       |          | X              | X               |            | X         |
| Pandey, 2020 (25)           | 97       | 103  | X                       |          |                |                 |            |           |
| Putot, 2018 (26)            | 2036     | 847  | X                       |          | X              | X               |            | X         |
| Putot, 2019 (27)            | 365      | 254  | X                       |          | X              | X               |            | X         |
| Putot, 2020 (28)            | 3710     | 862  | X                       |          | X              | X               |            | X         |
| Radovanovic, 2017 (29)      | 13828    | 1091 | X                       |          | X              |                 | X          | X         |

|                      |      |      |   |   |   |   |   |   |
|----------------------|------|------|---|---|---|---|---|---|
| Raphael, 2020 (30)   | 1365 | 1054 | X |   | X | X | X | X |
| Reed, 2017 (31)      | 88   | 162  |   |   | X | X | X |   |
| Saaby 2013 (32)      | 397  | 144  | X |   | X | X |   |   |
| Saaby, 2014 (33)     | 360  | 119  | X |   | X | X | X | X |
| Sandoval, 2014 (34)  | 66   | 190  | X | X | X | X |   | X |
| Sandoval, 2017 (35)  | 77   | 140  | X | X | X | X | X | X |
| Sato, 2020 (36)      | 2834 | 155  | X |   | X |   | X | X |
| Shah, 2015 (37)      | 1171 | 429  | X | X | X | X | X | X |
| Singh, 2020 (38)     | 2097 | 1225 | X |   | X |   | X | X |
| Smilowitz, 2018 (39) | 137  | 146  | X | X | X | X | X | X |
| Stein, 2014 (40)     | 2691 | 127  | X | X | X |   | X | X |
| Truong, 2020 (41)    | 275  | 175  | X | X | X |   | X | X |
|                      |      |      |   |   |   |   |   |   |

1  
2  
3  
4  
5  
6  
7  
8  
9  
10  
11  
12  
13  
14  
15  
16  
17  
18  
19  
20  
21  
22  
23  
24  
25  
26  
27  
28  
29  
30  
31  
32  
33  
34  
35  
36  
37  
38  
39  
40  
41  
42  
43  
44  
45  
46

Table S4. Risk of bias assessment

| Author, Year                | Outcome                          |                          |            |                  |                       | Summary          |
|-----------------------------|----------------------------------|--------------------------|------------|------------------|-----------------------|------------------|
|                             | Representative of Exposed Cohort | Selection of Non-exposed | Assessment | Follow-up Length | Adequacy of Follow-Up |                  |
| Arora, 2018 (1)             | x                                | x                        | x          | x                | x                     | 8 (good quality) |
| Balanescu, 2020 (2)         | 0                                | x                        | x          | 0                | x                     | 6 (fair quality) |
| Baron, 2015 (3)             | x                                | x                        | x          | x                | x                     | 8 (good quality) |
| Baron, 2016 (4)             | x                                | x                        | x          | x                | x                     | 8 (good quality) |
| Bonaca, 2012 (5)            | x                                | x                        | x          | x                | x                     | 8 (good quality) |
| Cediel, 2017 (6)            | x                                | x                        | x          | x                | x                     | 8 (good quality) |
| Chapman, 2018 (7)           | x                                | x                        | x          | x                | x                     | 8 (good quality) |
| Chapman, 2020 (8)           | x                                | x                        | x          | x                | x                     | 8 (good quality) |
| Consuegra-Sanchaz, 2018 (9) | 0                                | 0                        | x          | 0                | 0                     | 3 (poor quality) |
| El-Haddad, 2012 (10)        | x                                | x                        | 0          | 0                | 0                     | 5 (fair quality) |
| Etaher, 2020 (11)           | x                                | x                        | x          | x                | x                     | 8 (good quality) |
| Furie, 2019 (12)            | x                                | x                        | x          | x                | x                     | 8 (good quality) |
| Guimaraes, 2018 (13)        | 0                                | 0                        | x          | 0                | x                     | 4 (fair quality) |
| Hawatmeh, 2020 (14)         | 0                                | 0                        | x          | x                | 0                     | 4 (fair quality) |
| Higuchi, 2019 (15)          | 0                                | 0                        | x          | x                | x                     | 5 (fair quality) |
| Javed, 2009 (16)            | x                                | x                        | x          | x                | x                     | 8 (good quality) |
| Kadesjo, 2019 (17)          | x                                | x                        | x          | x                | x                     | 8 (good quality) |
| Lambrecht, 2018 (18)        | x                                | x                        | x          | x                | x                     | 8 (good quality) |
| Landes, 2016 (19)           | x                                | x                        | x          | x                | x                     | 8 (good quality) |
| Lopez-Cuenca, 2016 (20)     | x                                | x                        | x          | x                | x                     | 8 (good quality) |
| Meigher, 2016 (21)          | x                                | x                        | x          | x                | x                     | 8 (good quality) |
| Nestelberger, 2017 (22)     | x                                | x                        | x          | x                | x                     | 8 (good quality) |

|    |                        |   |   |   |   |                  |
|----|------------------------|---|---|---|---|------------------|
| 1  |                        |   |   |   |   |                  |
| 2  |                        |   |   |   |   |                  |
| 3  | Neumann, 2017 (23)     | x | x | x | x | 8 (good quality) |
| 4  | Paiva, 2015 (24)       | x | x | x | x | 8 (good quality) |
| 5  | Pandey, 2020 (25)      | 0 | 0 | 0 | 0 | 2 (poor quality) |
| 6  | Putot, 2018 (26)       | x | x | x | x | 8 (good quality) |
| 7  | Putot, 2019 (27)       | x | x | 0 | x | 7 (good quality) |
| 8  | Putot, 2020 (28)       | x | x | x | x | 8 (good quality) |
| 9  |                        |   |   |   |   |                  |
| 10 | Radovanovic, 2017 (29) | x | x | x | x | 8 (good quality) |
| 11 |                        |   |   |   |   |                  |
| 12 | Raphael, 2020 (30)     | x | x | x | x | 8 (good quality) |
| 13 | Reed, 2017 (31)        | x | x | x | x | 8 (good quality) |
| 14 | Saaby, 2013 (32)       | x | x | x | x | 8 (good quality) |
| 15 | Saaby, 2014 (33)       | x | x | x | x | 8 (good quality) |
| 16 | Sandoval, 2014 (34)    | x | x | x | x | 8 (good quality) |
| 17 | Sandoval, 2017 (35)    | x | x | x | x | 8 (good quality) |
| 18 | Sato, 2020 (36)        | 0 | 0 | 0 | x | 2 (poor quality) |
| 19 | Shah, 2015 (37)        | x | x | x | x | 8 (good quality) |
| 20 | Singh, 2020 (38)       | 0 | 0 | x | x | 6 (fair quality) |
| 21 | Smilowitz, 2018 (39)   | x | x | x | x | 7 (good quality) |
| 22 | Stein, 2014 (40)       | x | x | x | x | 7 (good quality) |
| 23 |                        |   |   |   |   |                  |
| 24 | Truong, 2020 (41)      | x | x | x | x | 8 (good quality) |
| 25 |                        |   |   |   |   |                  |
| 26 |                        |   |   |   |   |                  |
| 27 |                        |   |   |   |   |                  |
| 28 |                        |   |   |   |   |                  |
| 29 |                        |   |   |   |   |                  |
| 30 |                        |   |   |   |   |                  |
| 31 |                        |   |   |   |   |                  |
| 32 |                        |   |   |   |   |                  |
| 33 |                        |   |   |   |   |                  |
| 34 |                        |   |   |   |   |                  |
| 35 |                        |   |   |   |   |                  |
| 36 |                        |   |   |   |   |                  |
| 37 |                        |   |   |   |   |                  |
| 38 |                        |   |   |   |   |                  |
| 39 |                        |   |   |   |   |                  |
| 40 |                        |   |   |   |   |                  |
| 41 |                        |   |   |   |   |                  |
| 42 |                        |   |   |   |   |                  |
| 43 |                        |   |   |   |   |                  |
| 44 |                        |   |   |   |   |                  |
| 45 |                        |   |   |   |   |                  |
| 46 |                        |   |   |   |   |                  |

1  
2  
3  
4  
5  
6  
7  
8  
9  
10  
11  
12  
13  
14  
15  
16  
17  
18  
19  
20  
21  
22  
23  
24  
25  
26  
27  
28  
29  
30  
31  
32  
33  
34  
35  
36  
37  
38  
39  
40  
41  
42  
43  
44  
45  
46  
47  
48  
49  
50  
51  
52  
53  
54  
55  
56  
57  
58  
59  
60

| Precipitating Factor                  | Events | Patients | %     |
|---------------------------------------|--------|----------|-------|
| Sepsis                                | 1116   | 3110     | 35.9% |
| Arrhythmia                            | 2047   | 6868     | 29.8% |
| Heart failure                         | 958    | 3346     | 28.6% |
| Valvular abnormality                  | 351    | 1301     | 27.0% |
| Anaemia                               | 1692   | 6281     | 26.9% |
| Respiratory failure                   | 762    | 4424     | 17.2% |
| Non-cardiac surgery                   | 103    | 841      | 12.2% |
| Infection                             | 361    | 3412     | 10.6% |
| Shock/hypotension                     | 291    | 3006     | 9.7%  |
| Hypertension                          | 321    | 3620     | 8.9%  |
| Pulmonary oedema                      | 33     | 380      | 8.7%  |
| Chronic obstructive pulmonary disease | 137    | 1661     | 8.2%  |
| Bradycardia                           | 35     | 484      | 7.2%  |
| Renal failure                         | 133    | 1956     | 6.8%  |
| Stroke                                | 68     | 1731     | 3.9%  |
| Coronary spasm                        | 36     | 1048     | 3.4%  |
| Bleeding                              | 53     | 1834     | 2.9%  |
| Coronary endothelial dysfunction      | 1      | 592      | 0.2%  |



Table S6. Clinical features on presentation in patients with T2MI versus T1MI patients.

| Presenting Symptom         | T2MI                                 |                          |       | T1MI                                 |                          |       | Odds ratio *<br>[95% CI] |
|----------------------------|--------------------------------------|--------------------------|-------|--------------------------------------|--------------------------|-------|--------------------------|
|                            | No. patients with presenting symptom | Total number of patients | %     | No. patients with presenting symptom | Total number of patients | %     |                          |
| Chest pain                 | 4344                                 | 7335                     | 59.2% | 73103                                | 83371                    | 87.7% | 0.19 [0.15, 0.26]        |
| Dyspnoea                   | 1681                                 | 6080                     | 27.6% | 8154                                 | 82617                    | 9.9%  | 2.83 [1.96, 4.08]        |
| Arm or shoulder discomfort | 28                                   | 330                      | 8.5%  | 50                                   | 143                      | 35.0% | 0.18 [0.11, 0.30]        |
| Jaw or neck discomfort     | 6                                    | 140                      | 4.3%  | 12                                   | 77                       | 15.6% | 0.24 [0.09, 0.68]        |
| Epigastric discomfort      | 8                                    | 140                      | 5.7%  | 8                                    | 77                       | 10.4% | 0.52 [0.19, 1.45]        |
| Nausea or vomiting         | 46                                   | 330                      | 13.9% | 39                                   | 143                      | 27.3% | 0.46 [0.28, 0.74]        |
| Fatigue                    | 5                                    | 140                      | 3.6%  | 5                                    | 77                       | 6.5%  | 0.53 [0.15, 1.90]        |
| Diaphoresis                | 16                                   | 140                      | 11.4% | 16                                   | 77                       | 20.8% | 0.49 [0.23, 1.05]        |
| Other nonspecific symptoms | 1252                                 | 2932                     | 42.7% | 4096                                 | 58884                    | 7.0%  | 4.19 [0.72, 24.39]       |
| Collapse / syncope         | 99                                   | 2125                     | 4.7%  | 157                                  | 7152                     | 2.2%  | 2.10 [1.05, 4.18]        |

\*Comparing T2MI with T1MI patients, with odds ratio adjusted according to study weighting using random effects meta-analysis

Abbreviations: URL- upper reference limit; STEMI- ST elevation myocardial infarction; NSTEMI- Non- ST elevation myocardial infarction; MI- Myocardial infarction; cTn- cardiac troponin; T1MI- Type 1 myocardial infarction; T2MI- Type 2 myocardial infarction; ECG- electrocardiogram; CAD- coronary artery disease; PCI- percutaneous coronary intervention; CABG- coronary artery bypass graft; IHD- ischaemic heart disease; MACE- Major adverse cardiovascular events; CI- confidence interval

Table S7. Cardiac investigations in patients with T2 MI versus T1MI.

| Variable                                                                                                                                                                                                                                                                                      | T2MI                                            |                    |       | T1MI                                            |                      |       | Odds ratio*<br>(95% CI) |
|-----------------------------------------------------------------------------------------------------------------------------------------------------------------------------------------------------------------------------------------------------------------------------------------------|-------------------------------------------------|--------------------|-------|-------------------------------------------------|----------------------|-------|-------------------------|
|                                                                                                                                                                                                                                                                                               | No. patients with nominated diagnostic findings | Total no. patients | %     | No. patients with nominated diagnostic findings | Total no of patients | %     |                         |
| <b>ECG</b>                                                                                                                                                                                                                                                                                    |                                                 |                    |       |                                                 |                      |       |                         |
| ST elevation                                                                                                                                                                                                                                                                                  | 1265                                            | 9417               | 13.4% | 42726                                           | 101584               | 42.1% | 0.22 [0.18, 0.28]       |
| ST depression or T wave Inversion                                                                                                                                                                                                                                                             | 2174                                            | 6314               | 34.4% | 14938                                           | 68530                | 21.8% | 1.38 [0.94, 2.02]       |
| Pathological Q Waves                                                                                                                                                                                                                                                                          | 30                                              | 447                | 6.7%  | 177                                             | 850                  | 20.8% | 0.38 [0.20, 0.71]       |
| Non-specific ST-T wave changes                                                                                                                                                                                                                                                                | 146                                             | 592                | 24.7% | 45                                              | 417                  | 10.8% | 2.62 [1.81, 3.79]       |
| Left bundle branch block                                                                                                                                                                                                                                                                      | 338                                             | 3330               | 10.2% | 3045                                            | 60031                | 5.1%  | 1.72 [1.40, 2.12]       |
| Atrial fibrillation/flutter                                                                                                                                                                                                                                                                   | 448                                             | 1660               | 27.0% | 1871                                            | 18272                | 10.2% | 3.70 [2.87, 4.77]       |
| <b>Echocardiograph</b>                                                                                                                                                                                                                                                                        |                                                 |                    |       |                                                 |                      |       |                         |
| Echocardiogram performed                                                                                                                                                                                                                                                                      | 648                                             | 1353               | 47.9% | 1571                                            | 2830                 | 55.5% | 0.44 [0.20, 0.96]       |
| Presence of RWMA                                                                                                                                                                                                                                                                              | 97                                              | 286                | 33.9% | 101                                             | 214                  | 47.2% | 0.48 [0.06, 3.78]       |
| <b>Angiogram</b>                                                                                                                                                                                                                                                                              |                                                 |                    |       |                                                 |                      |       |                         |
| Angiogram performed                                                                                                                                                                                                                                                                           | 3686                                            | 10721              | 34.4% | 56242                                           | 67432                | 83.4% | 0.09 [0.06, 0.12]       |
| Obstructive coronary artery disease present                                                                                                                                                                                                                                                   | 1246                                            | 3663               | 34.0% | 19923                                           | 44404                | 44.9% | 0.16 [0.05, 0.54]       |
| Multivessel disease present                                                                                                                                                                                                                                                                   | 593                                             | 2147               | 27.6% | 11839                                           | 41715                | 28.4% | 0.40 [0.19, 0.82]       |
| *Comparing T2MI with T1MI patients, with odds ratio adjusted according to study weighting using random effects meta-analysis<br>ECG=electrocardiograph; RWMA=regional wall motion abnormalities; CI=confidence interval; T2MI=type 2 myocardial infarction; T1MI=type 1 myocardial infarction |                                                 |                    |       |                                                 |                      |       |                         |

Table S8. Troponin measurements.

| Troponin Measurement | Number of Studies | T1MI (min-max) | T2MI (min-max) |
|----------------------|-------------------|----------------|----------------|
| Baseline cTn (xULN)  | 12                | 0.14-190       | 0.1-8.2        |
| 6h cTn (xULN)        | 4                 | 13.2-142       | 4.25-11        |
| Peak cTn (xULN)      | 21                | 5.1-1703       | 2.8-447        |

Abbreviations: xULN= times upper limit normal

Figure S1. PRISMA flow diagram.

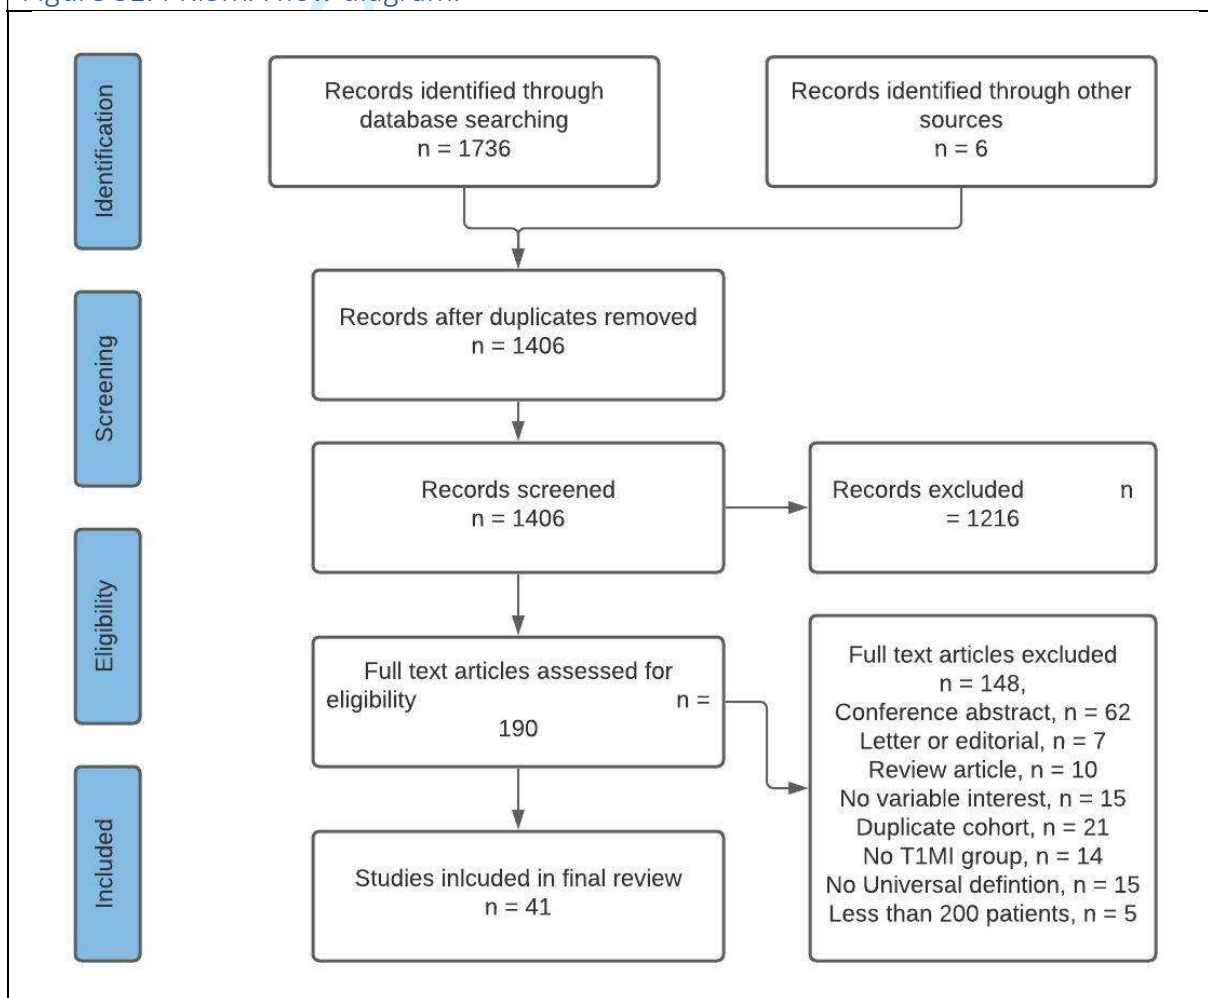

Figure S2. Forest Plot. Presence of Ischaemic Heart Disease.

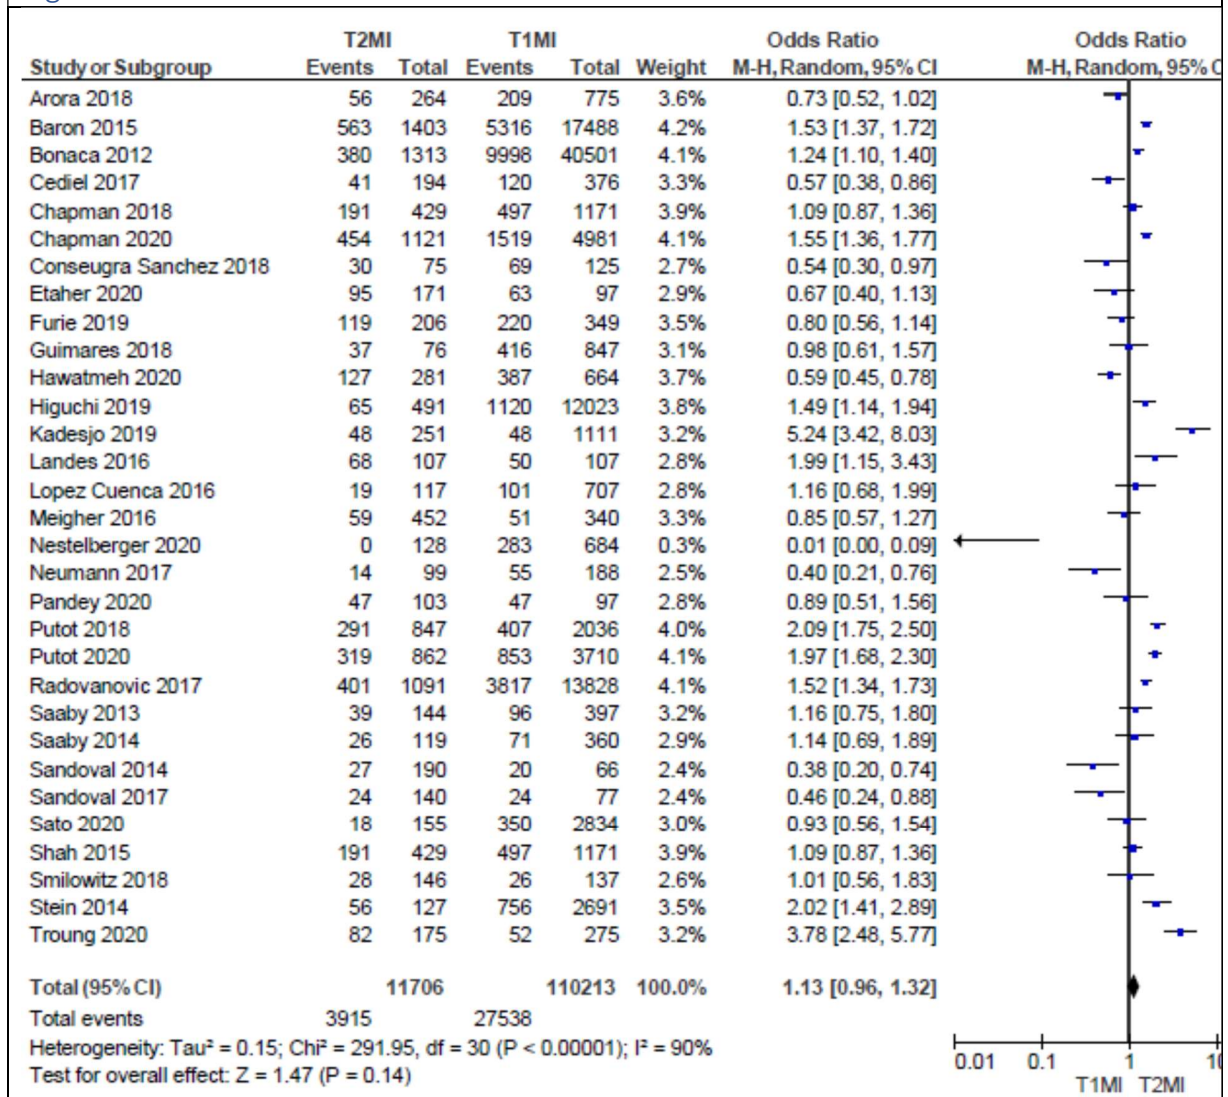

Figure S3. Forest Plot. Presence of Type 2 Diabetes Mellitus.

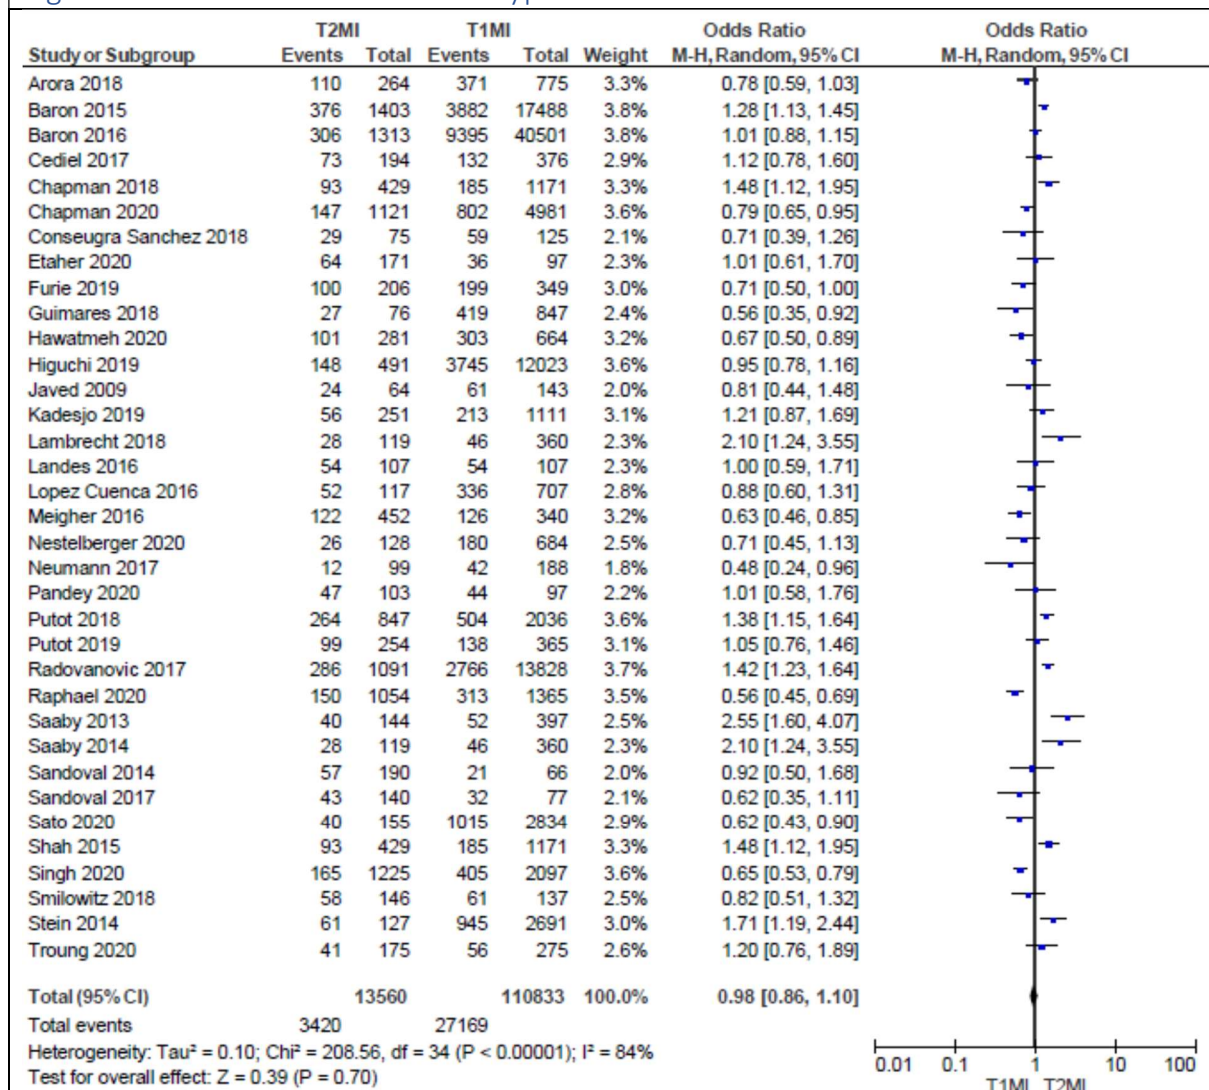

Figure S4. Forest Plot. Presence of Hypertension.

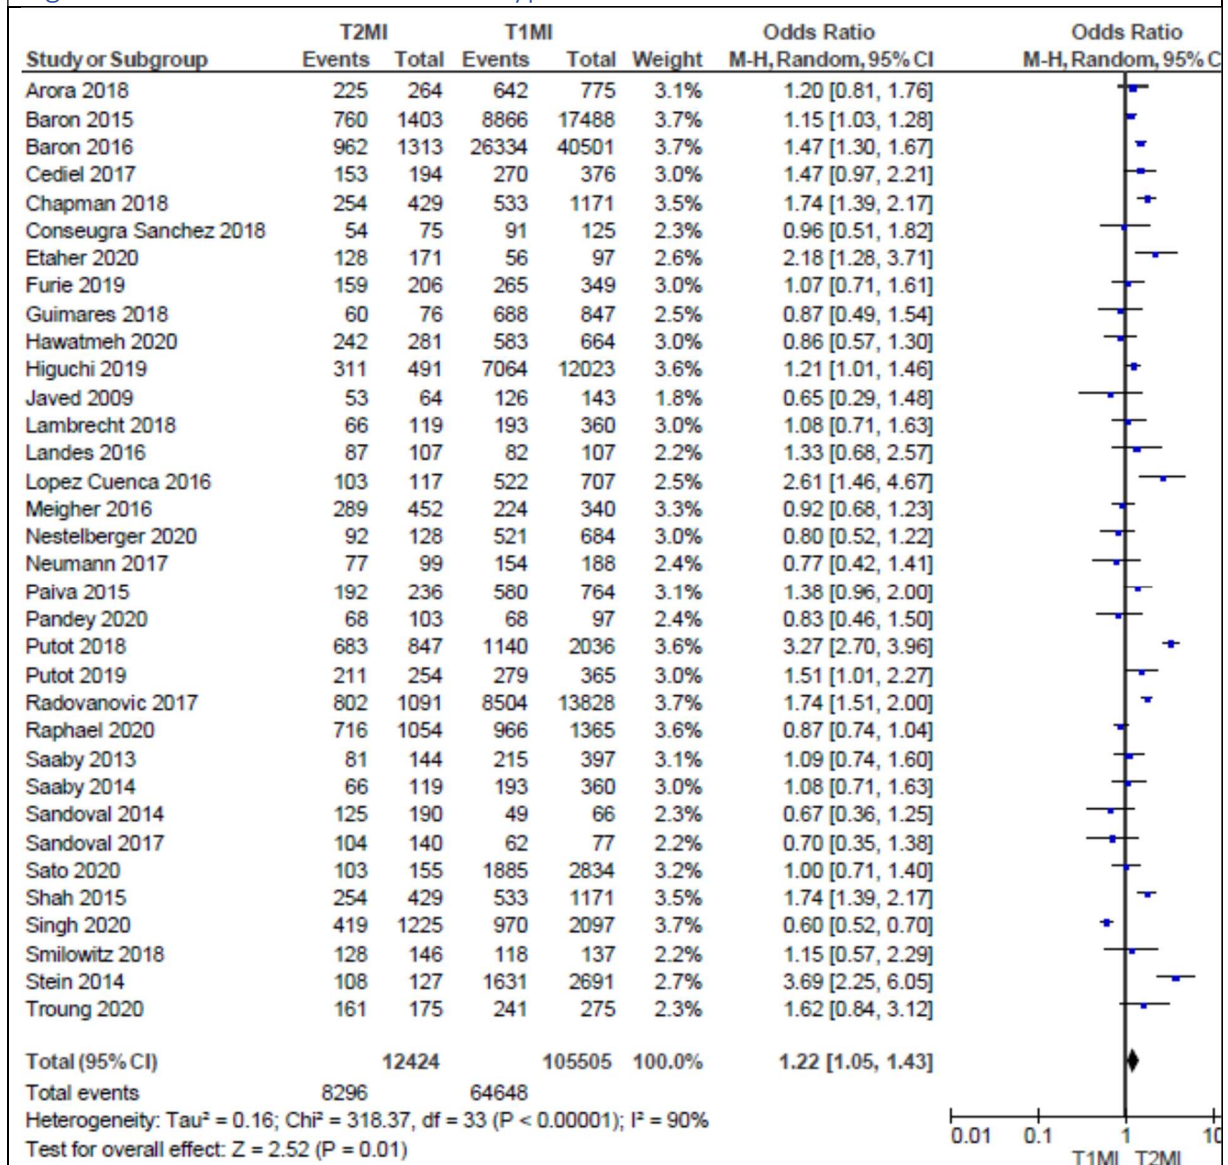

Figure S5. Forest Plot. Presence of Dyslipidaemia.

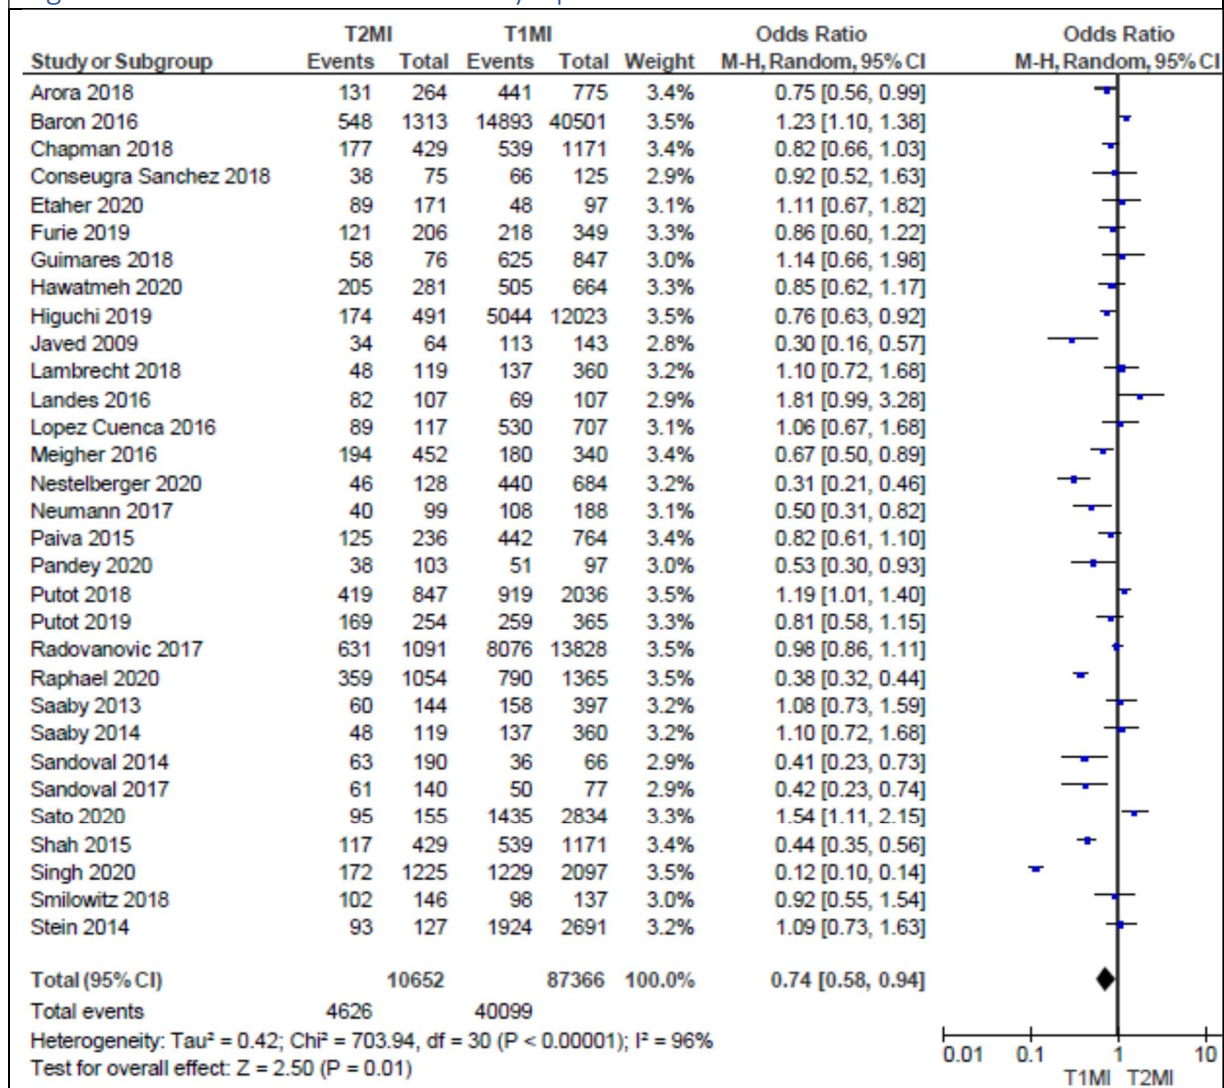

Figure S6. Forest Plot. Smoking Status.

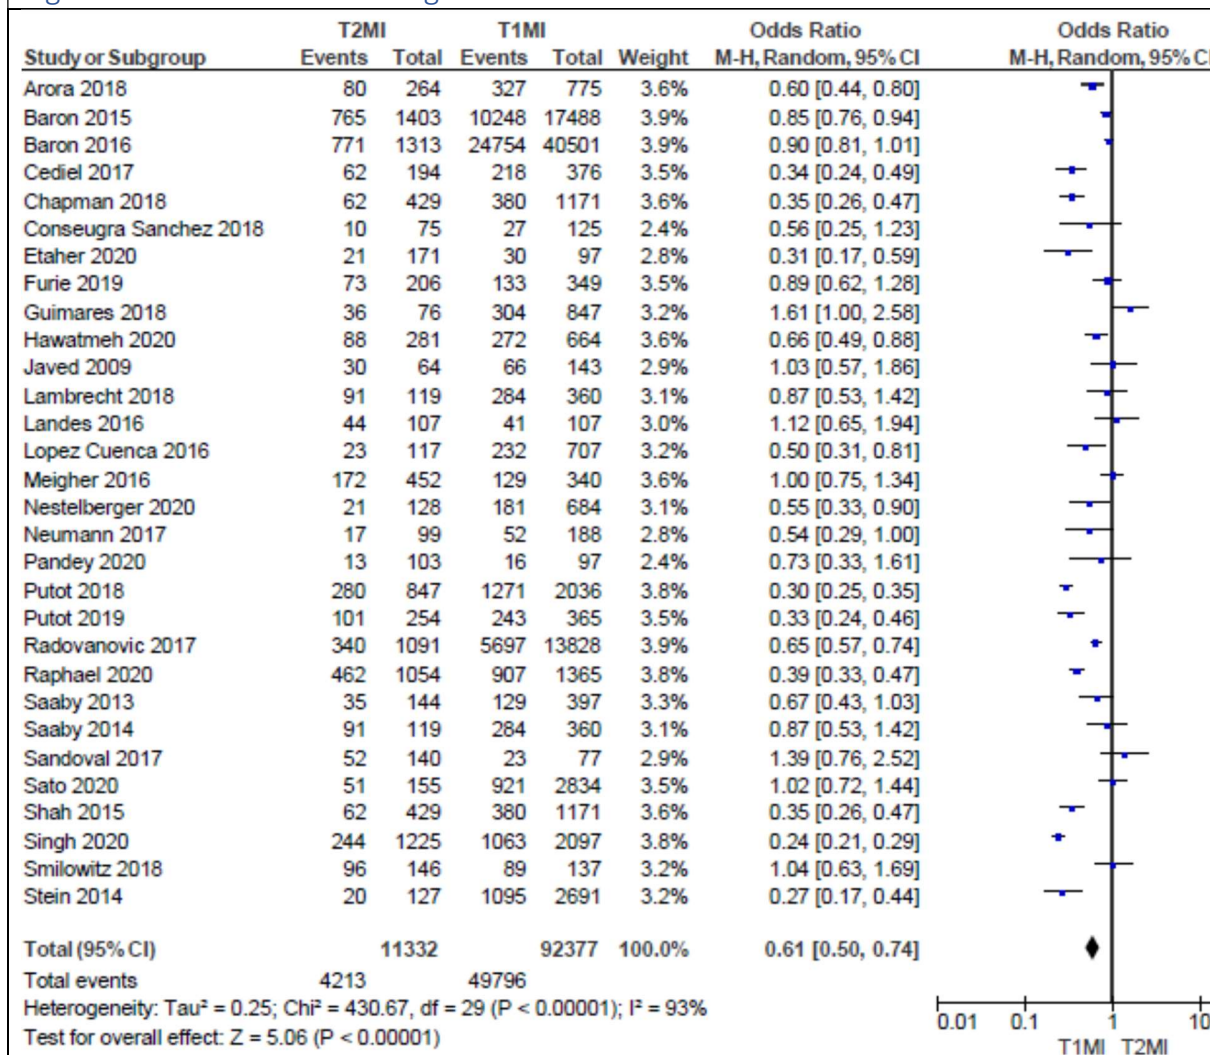

Figure S7. Forest Plot. Obesity Status.

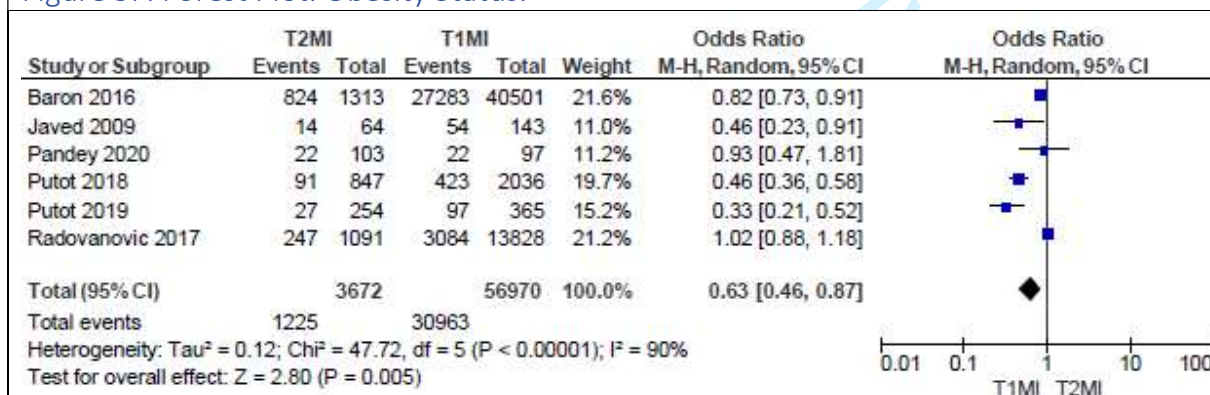



Figure S8. Forest Plot. Presence of Chronic Kidney Disease.

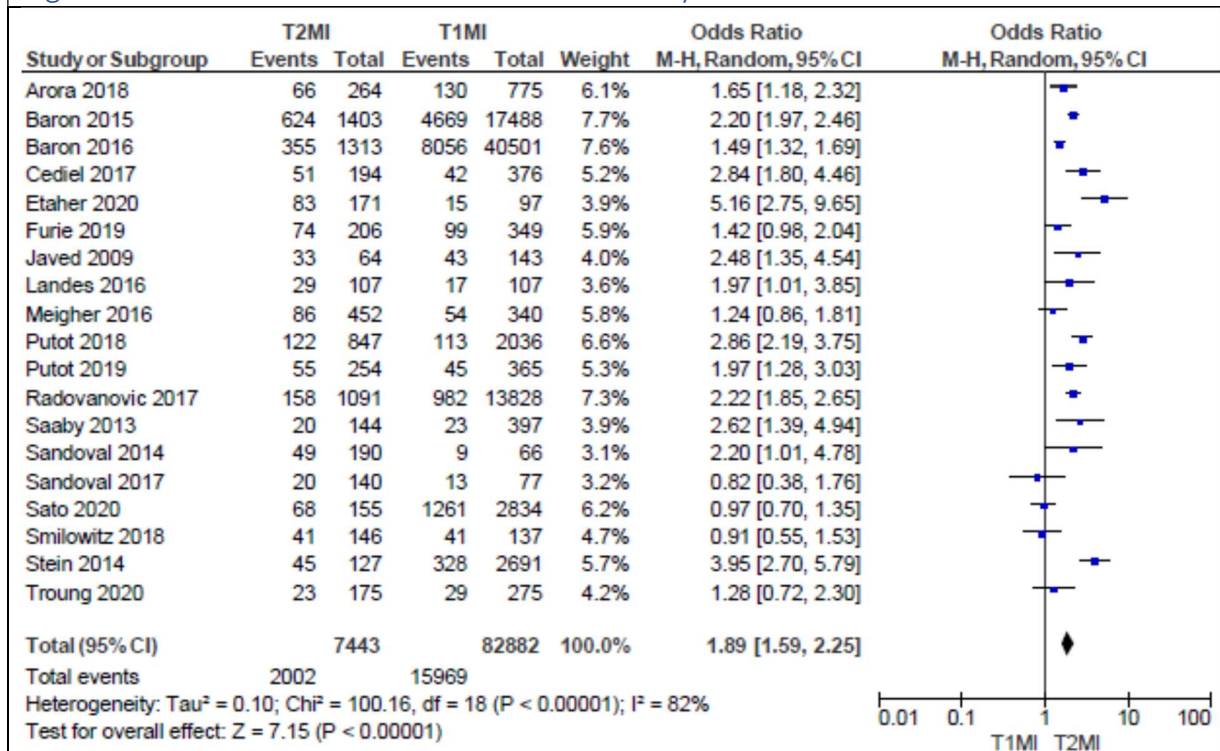

Review only

Figure S9. Forest Plot. Presence of Heart Failure.

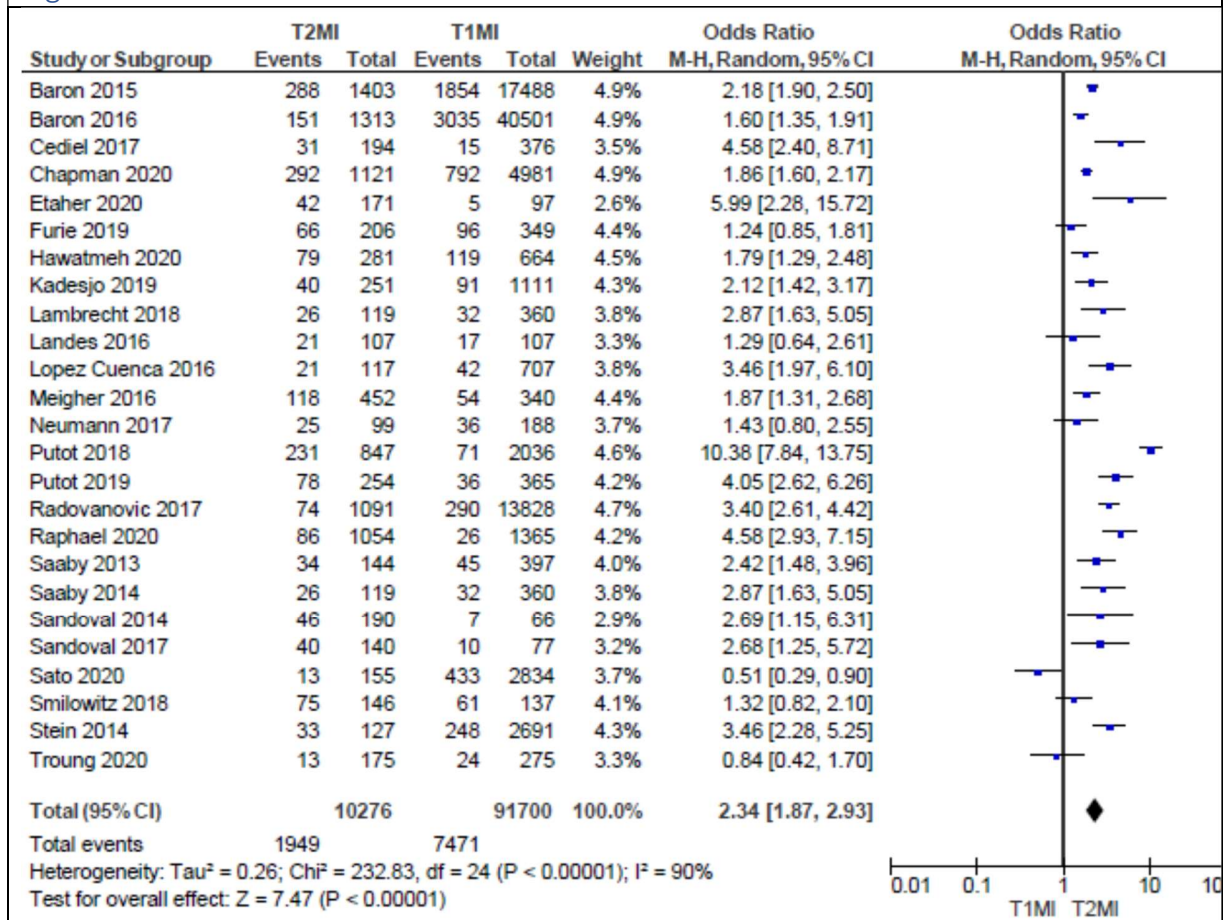

Figure S10. Forest Plot. Presence of Peripheral Vascular Disease.

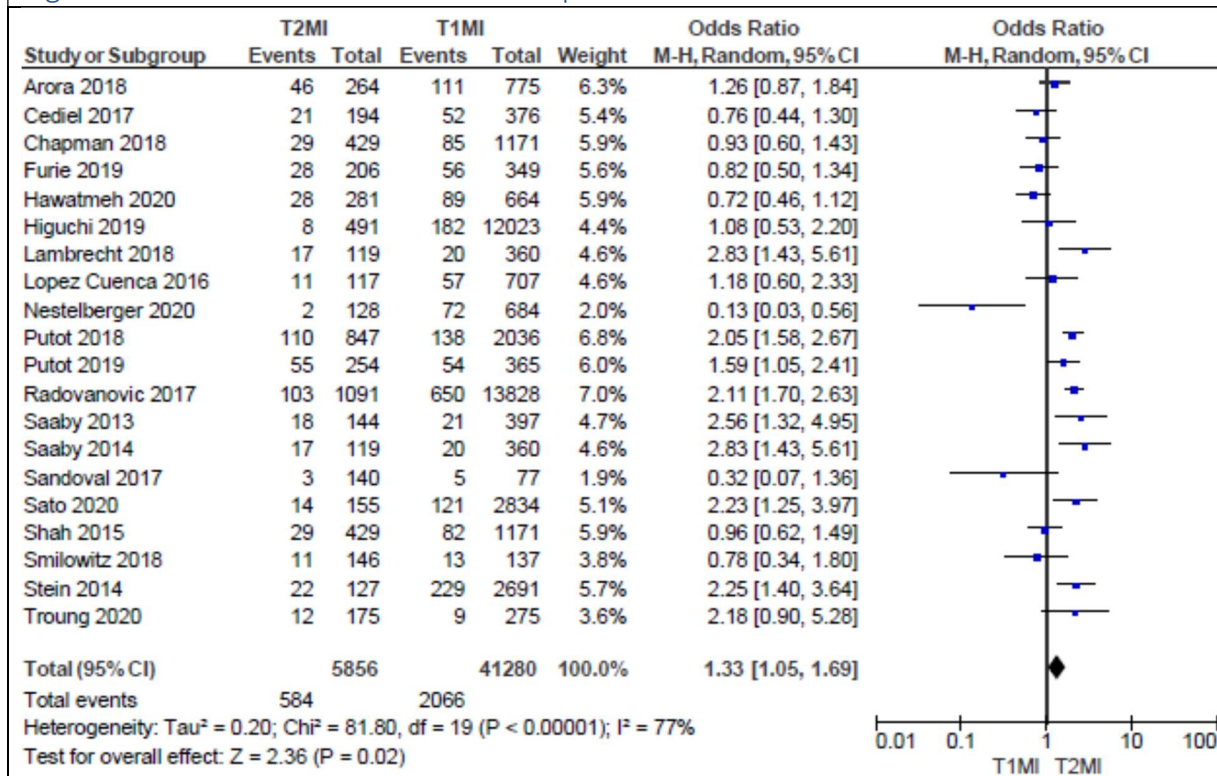

Figure S11. Forest Plot. Presence of Cerebrovascular Disease.

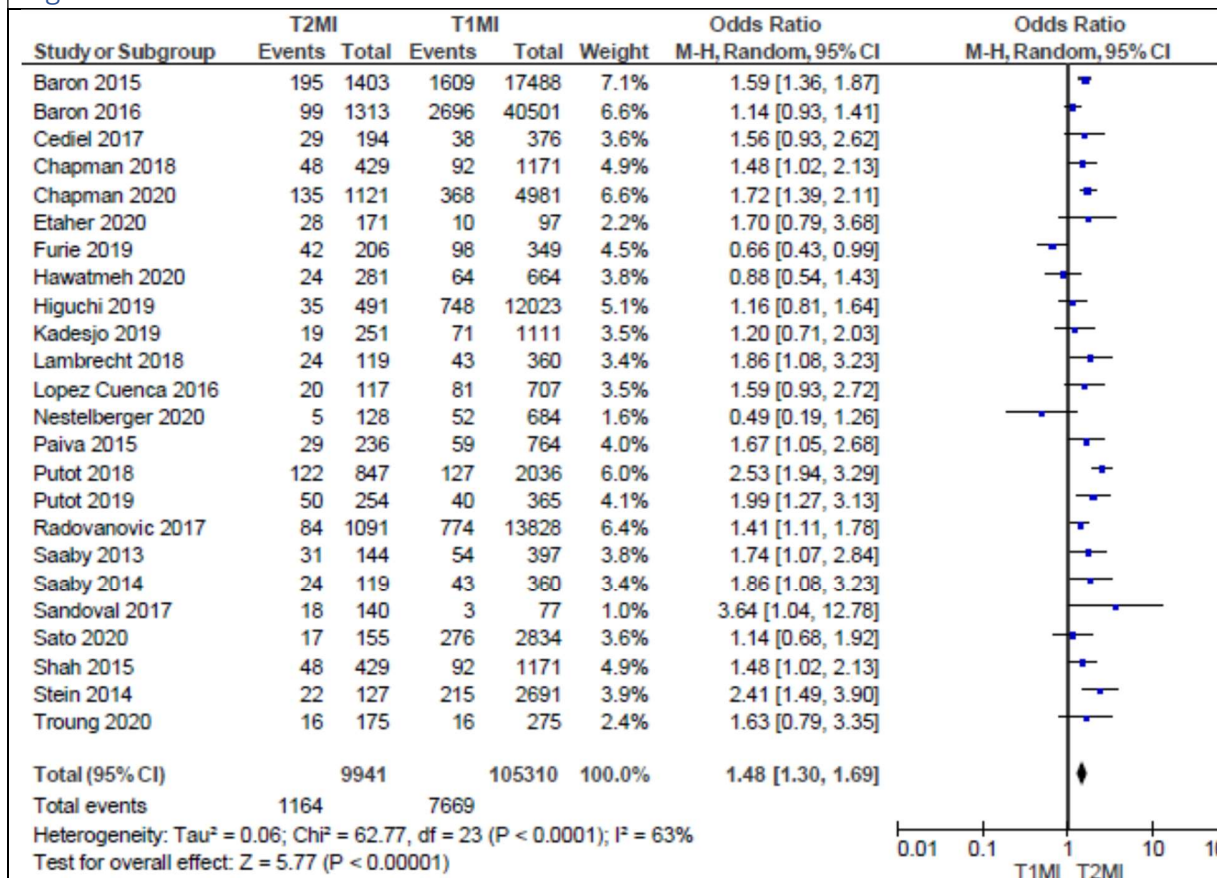

Figure S12. Forest Plot. Presence of Illicit Drug Use.

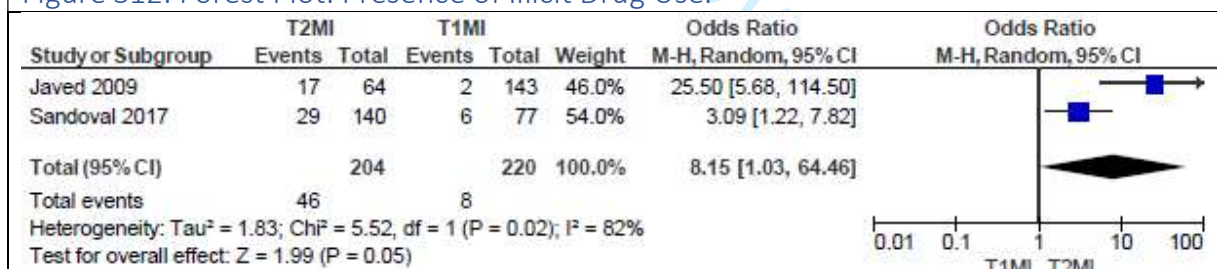

Figure S13. Forest Plot. Presence of Atrial Fibrillation.

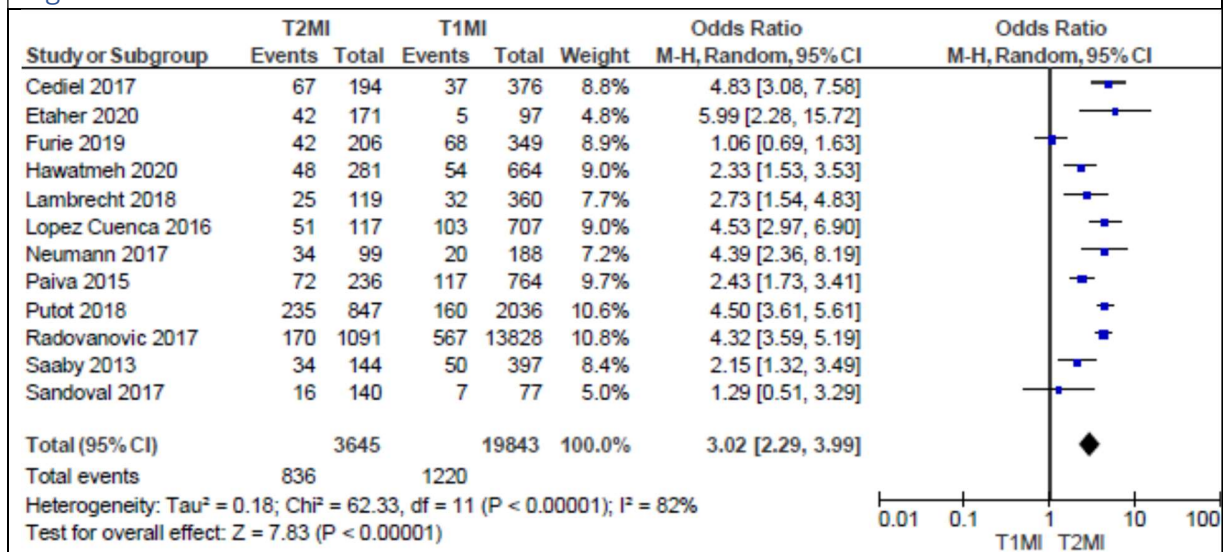

Figure S14. Forest Plot. Chest Pain as Presenting Feature.

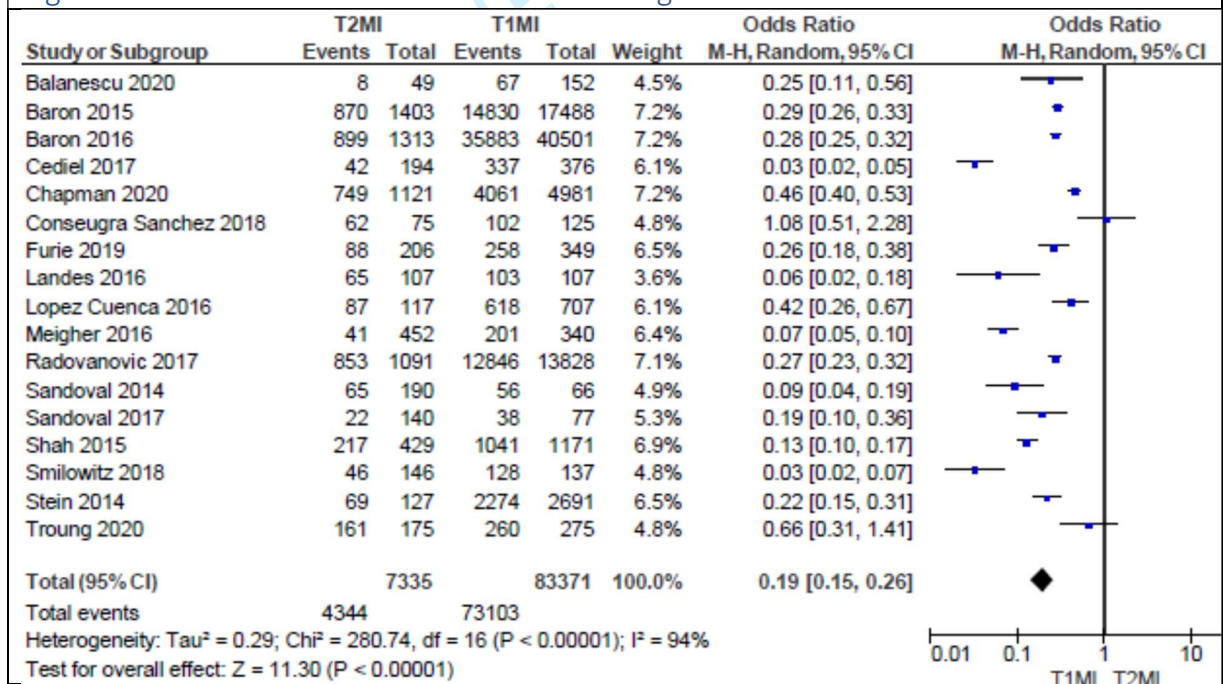

Figure S15. Forest Plot. Dyspnoea as Presenting Feature.

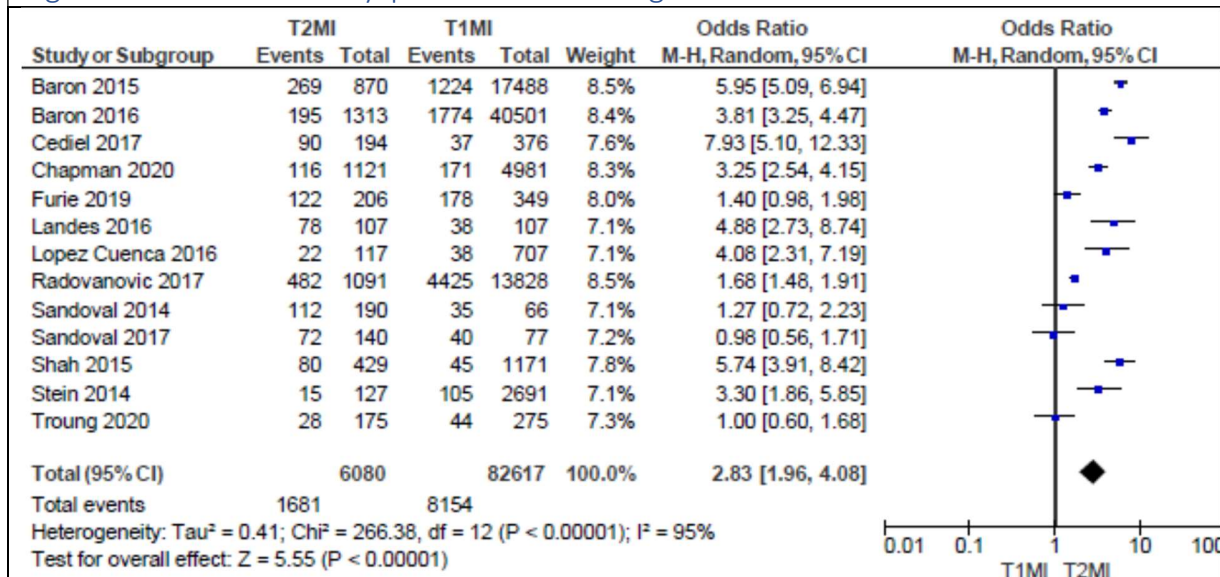

Figure S16. Forest Plot. Arm / Shoulder Discomfort as Presenting Feature.

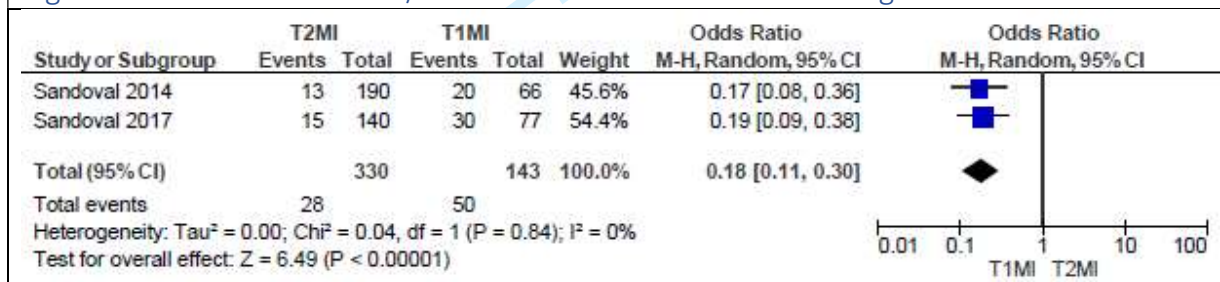

Figure S17. Forest Plot. Nausea / Vomiting as Presenting Feature.

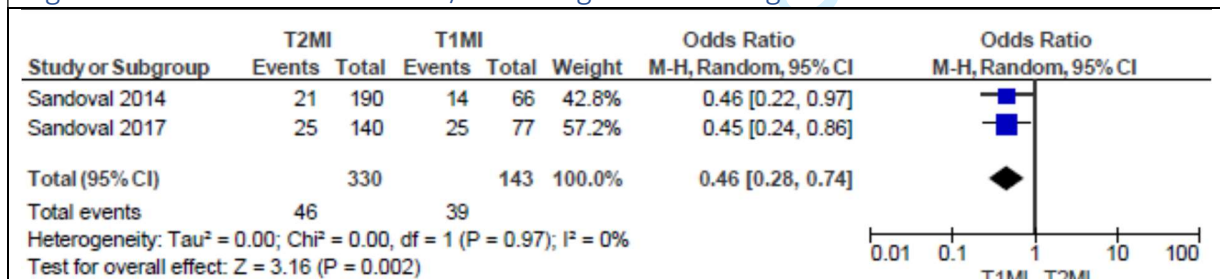

Figure S18. Forest Plot. Non-specific Symptoms as Presenting Features.

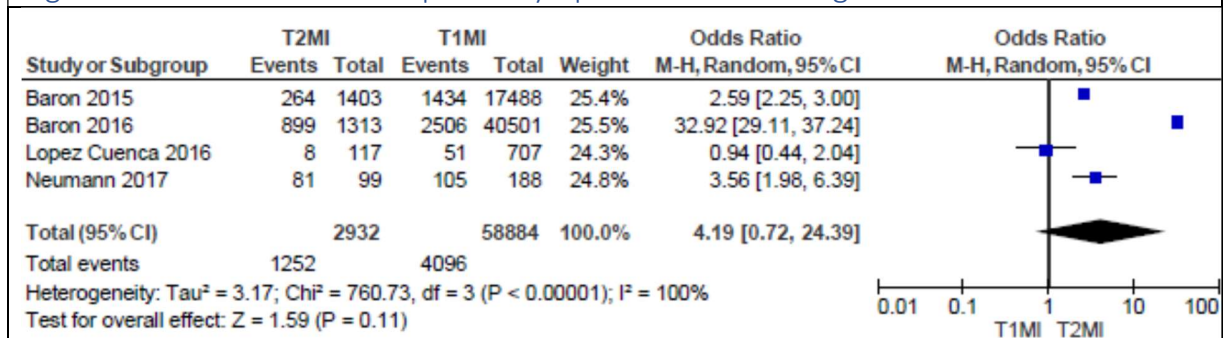

Figure S19. Forest Plot. Collapse / Syncope as Presenting Features.

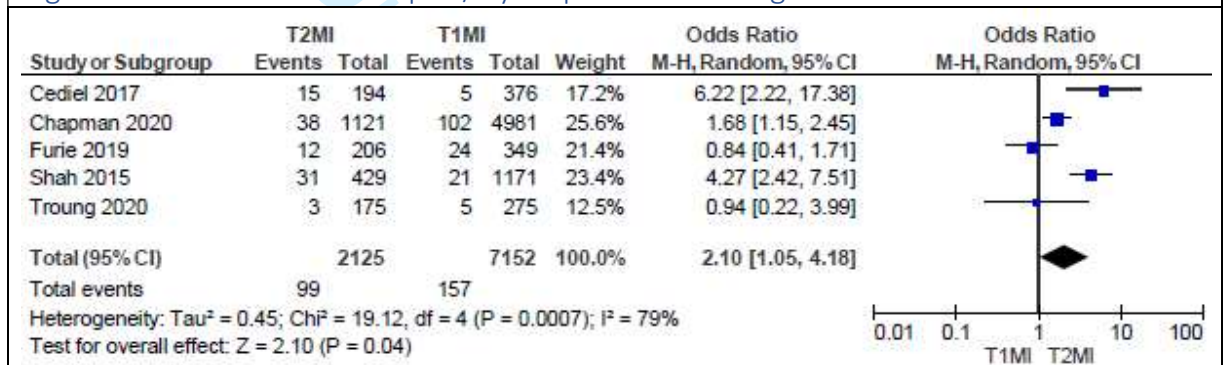

Figure S20. Forest Plot. ST Elevation on ECG.

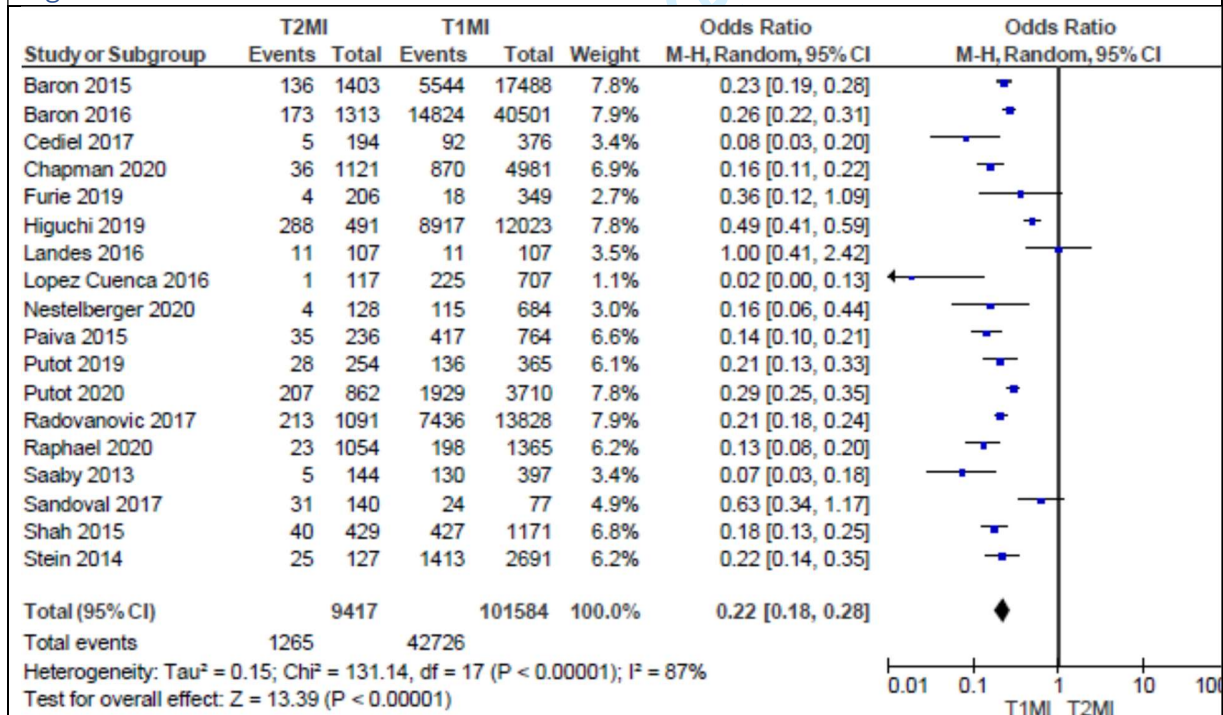

Figure S21. Forest Plot. ST Depression or T Wave Inversion on ECG.

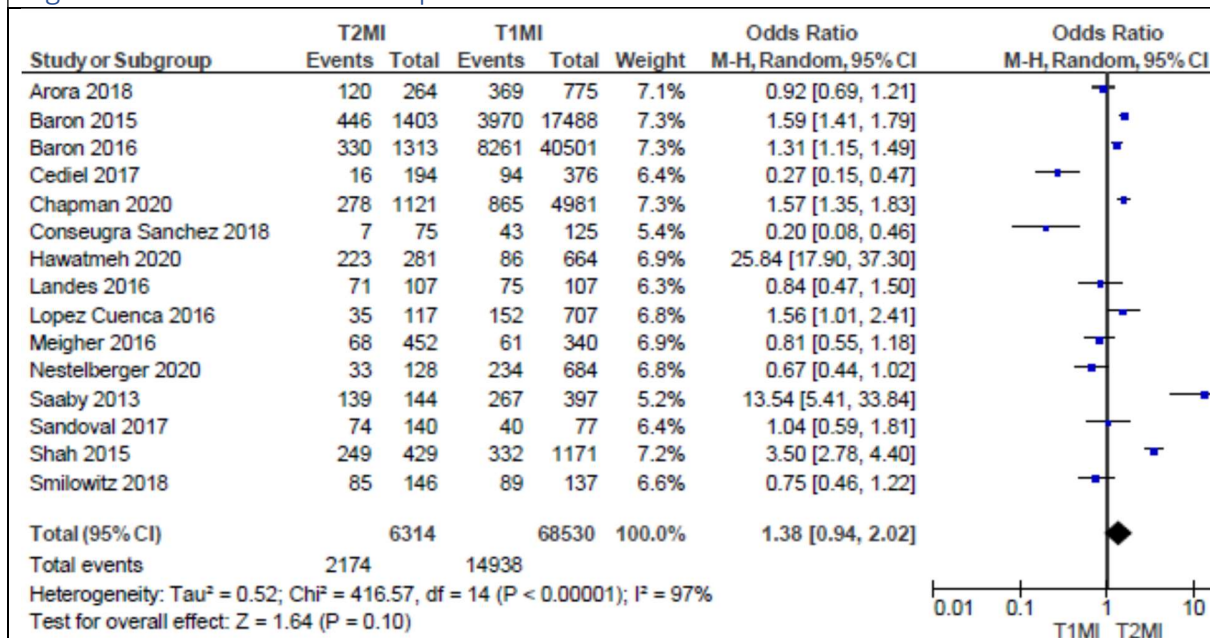

Figure S22. Forest Plot. Q Waves on ECG.

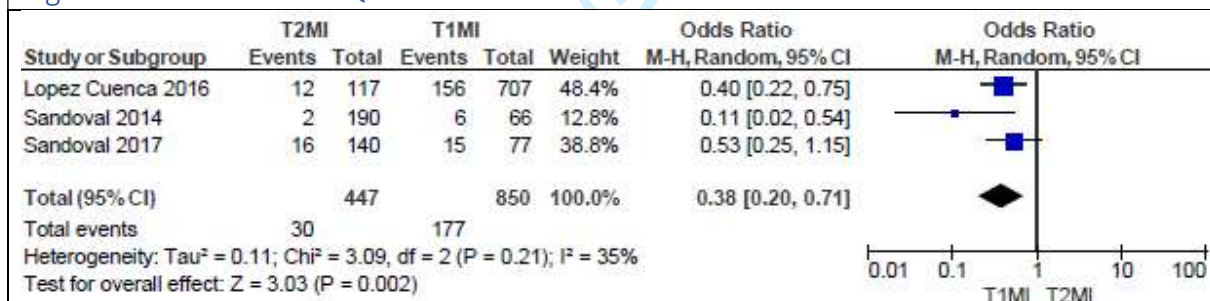

Figure S23. Forest Plot. Non-specific ST Changes on ECG.

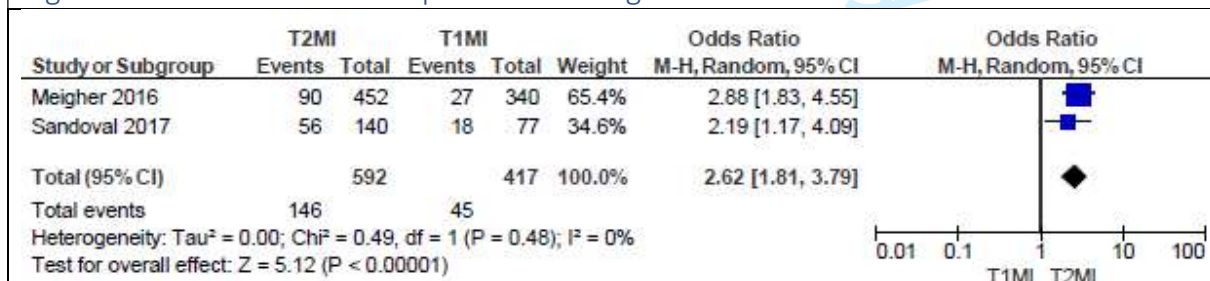



Figure S24. Forest Plot. Left Bundle Branch Block on ECG.

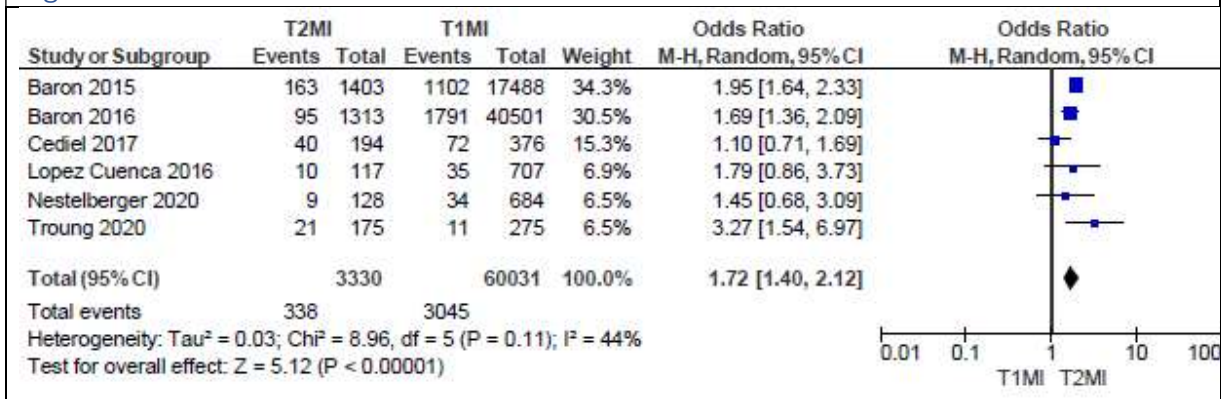

Figure S25. Forest Plot. Atrial Fibrillation on ECG.

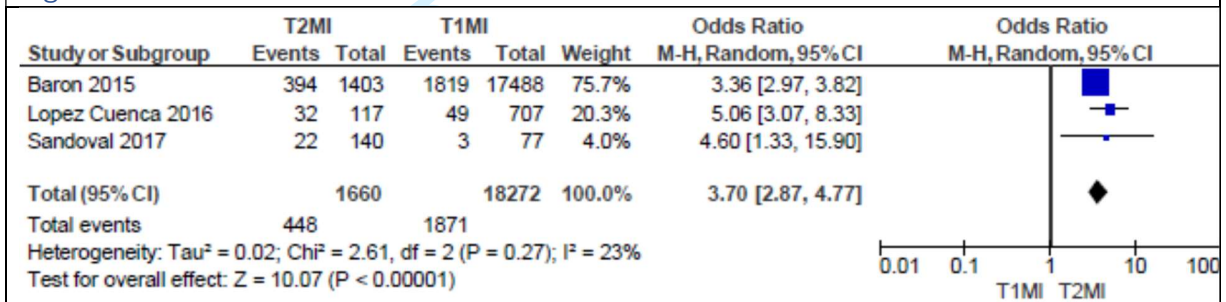

Figure S26. Forest Plot. Coronary Angiogram Performed.

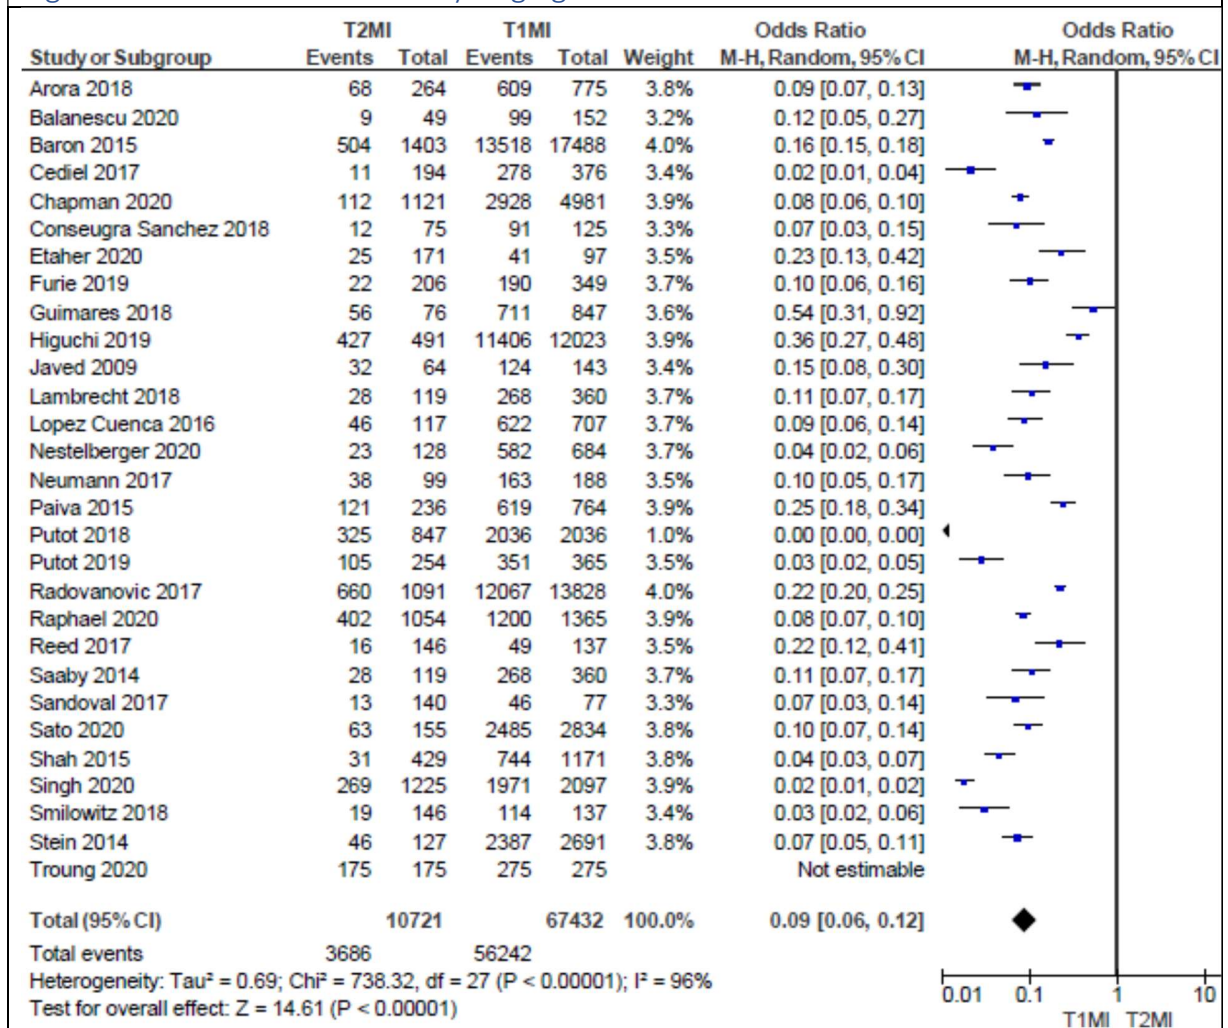

Figure S27. Forest Plot. Obstructive Coronary Artery Disease on Coronary Angiogram.

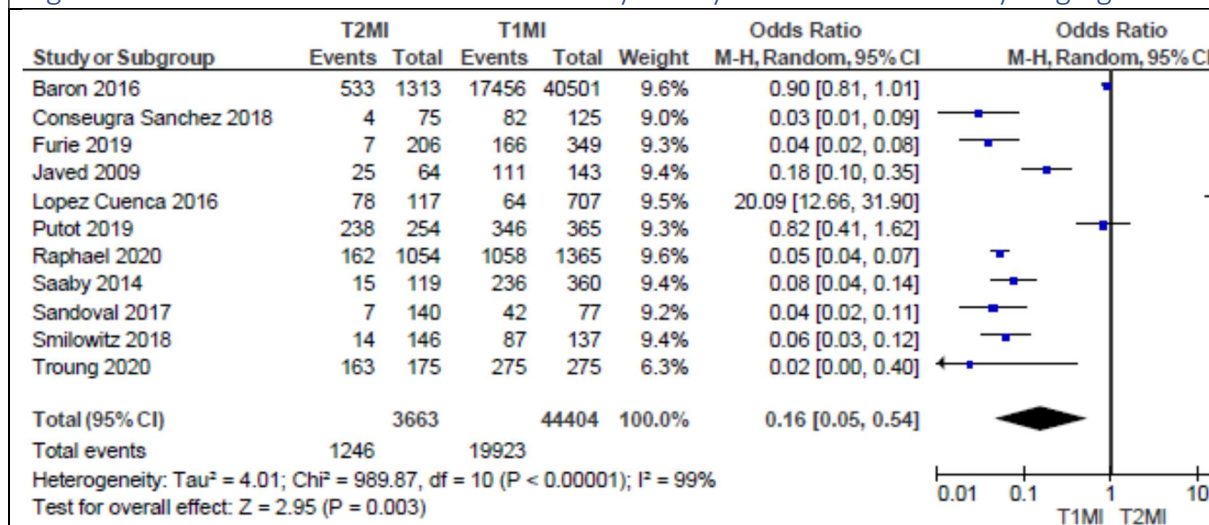

Figure S28. Forest Plot. Multivessel Disease on Coronary Angiogram.

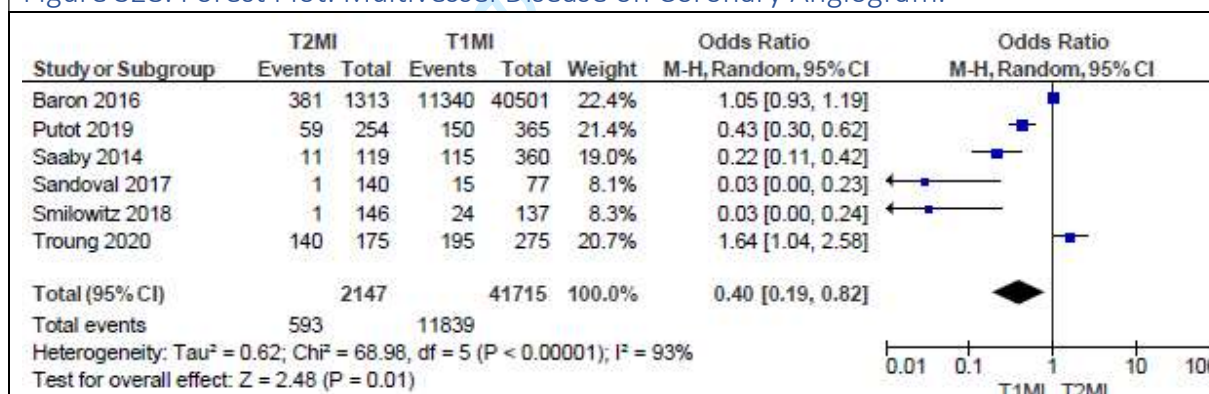

Figure S29. Forest Plot. Echocardiogram Performed.

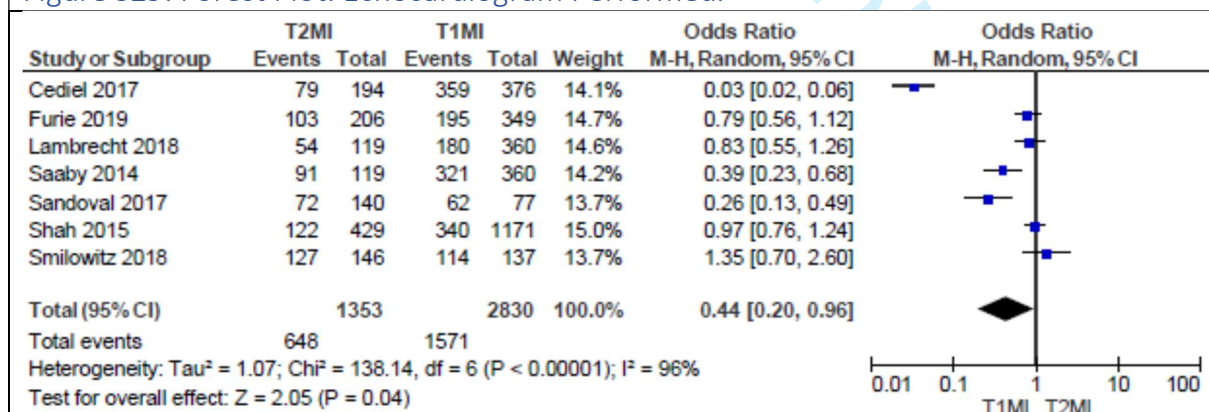

Figure S30. Forest Plot. Regional Wall Motion Abnormalities on Echocardiogram.

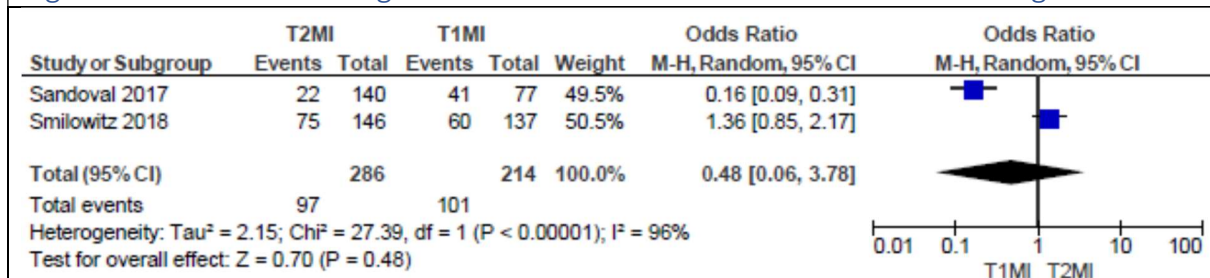

Figure S31. Forest Plot. Beta-Blockers Prescribed.

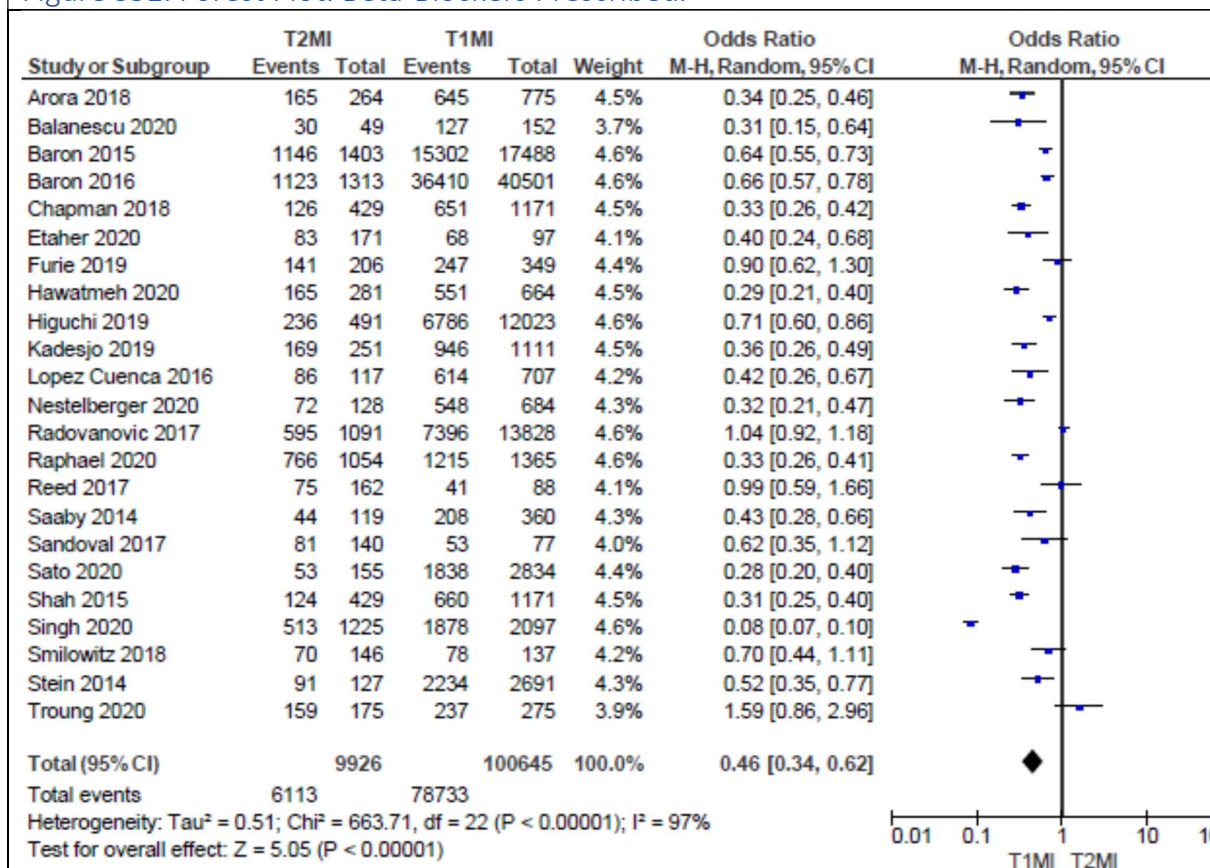

Figure S32. Forest Plot. ACEi/ARB Prescribed.

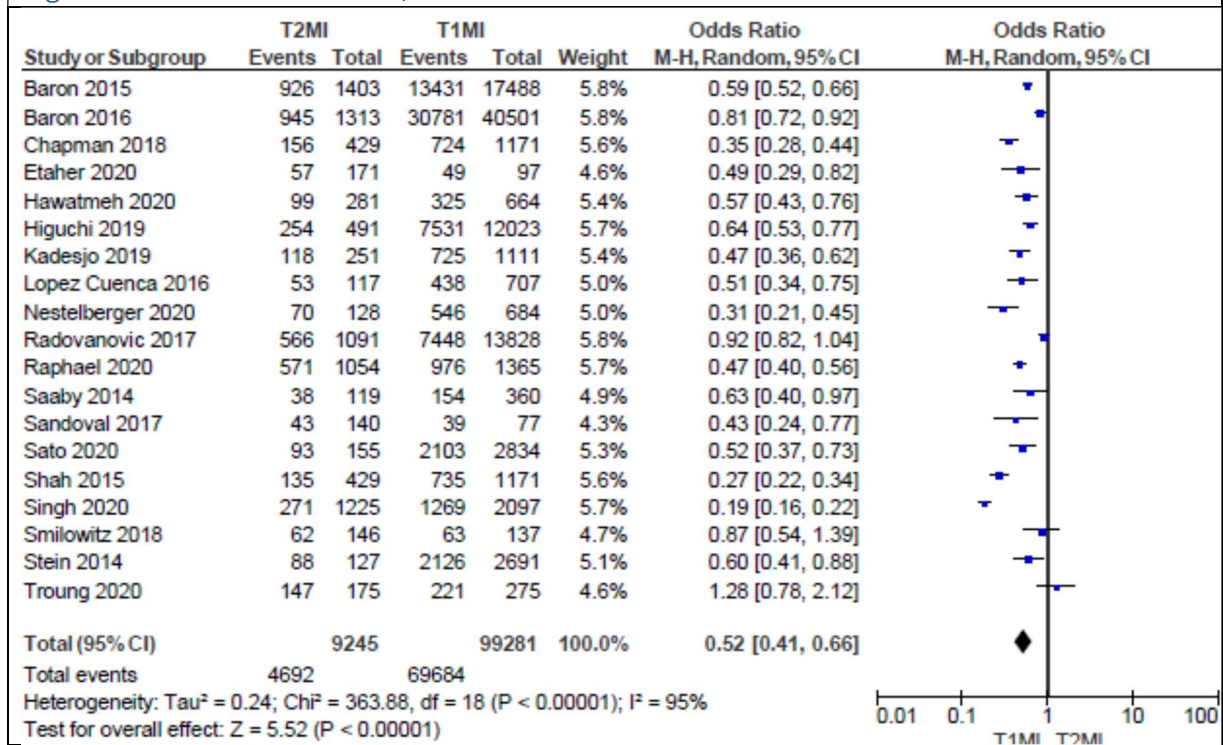

Figure S33. Forest Plot. Antiplatelets Prescribed.

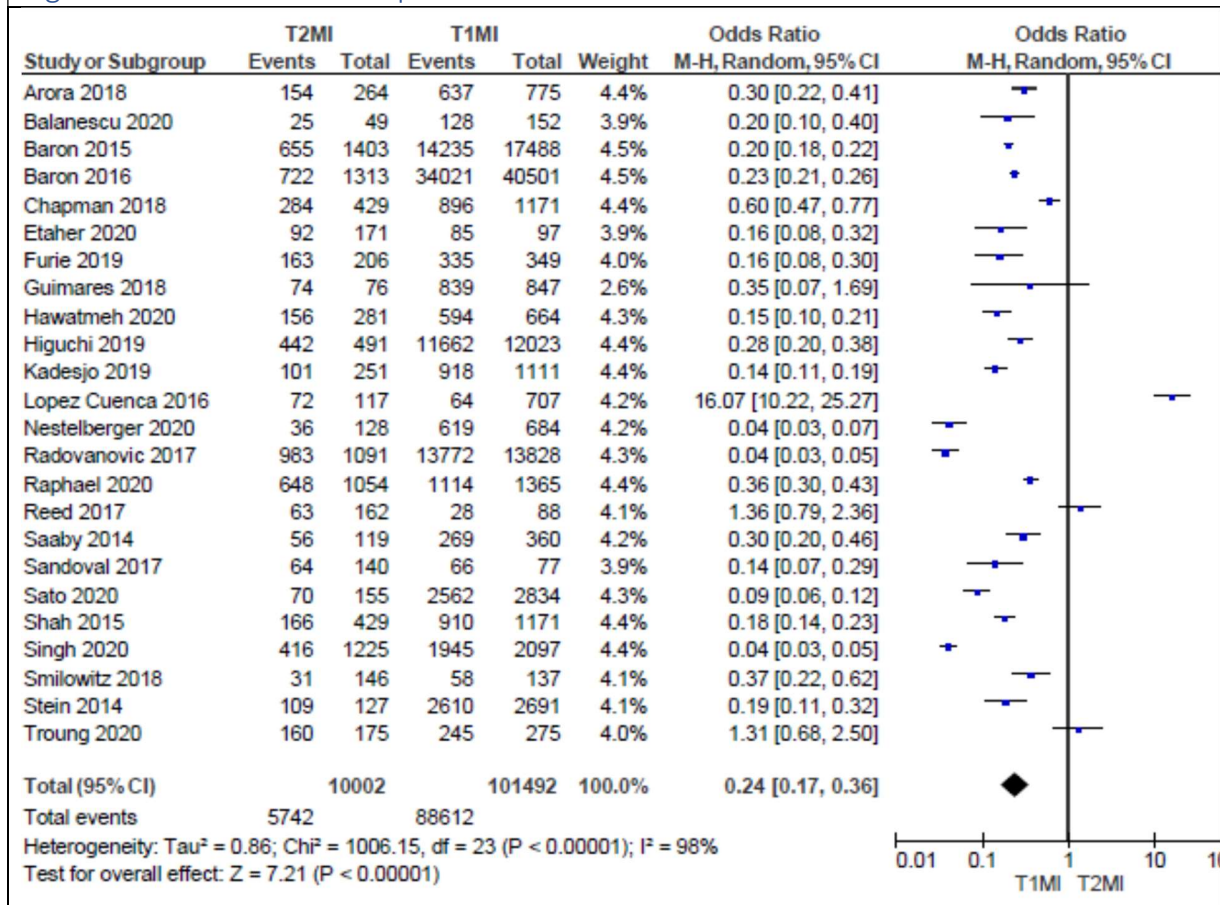

Figure S34. Forest Plot. Anticoagulants Prescribed.

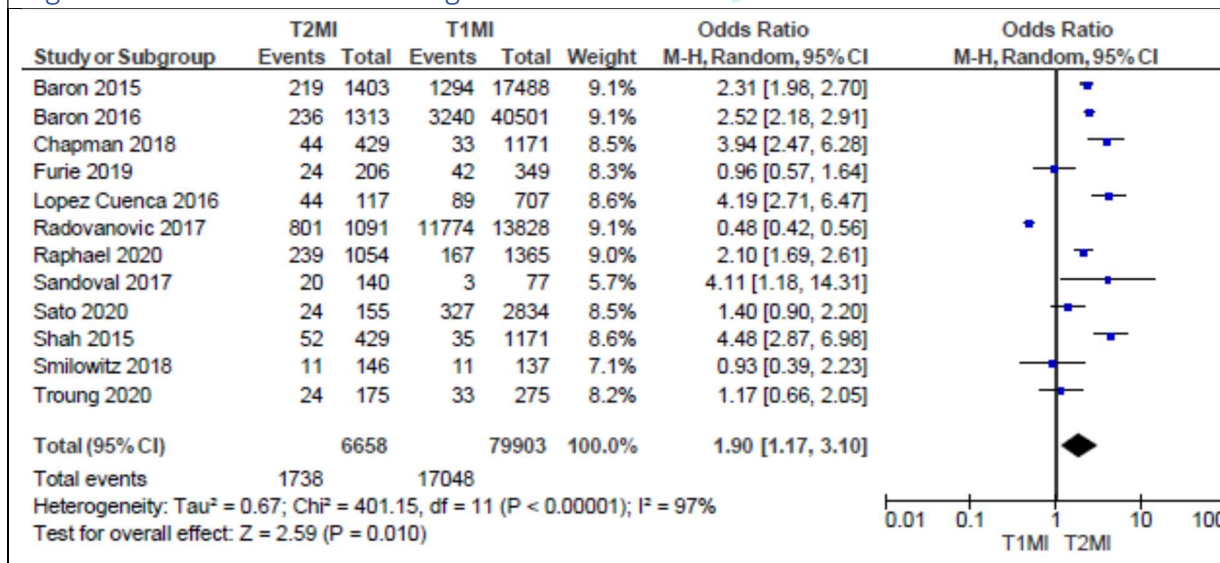

Figure S35. Forest Plot. Antianginal Drugs Prescribed.

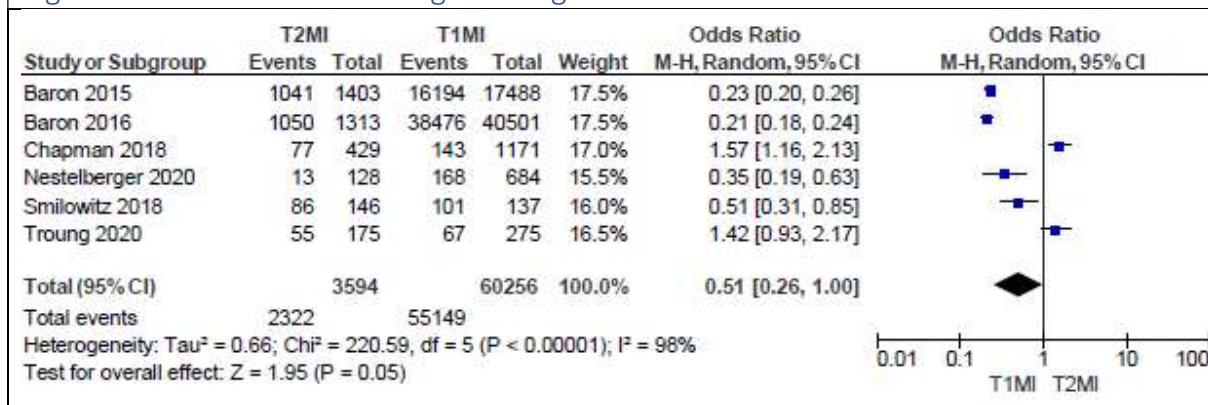

Figure S36. Forest Plot. Diuretics Prescribed.

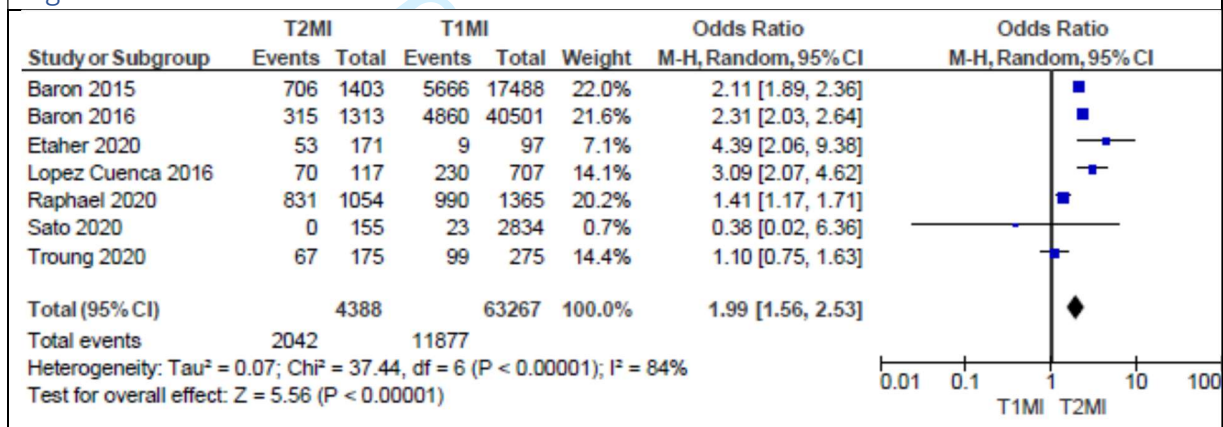

Figure S37. Forest Plot. Statins Prescribed.

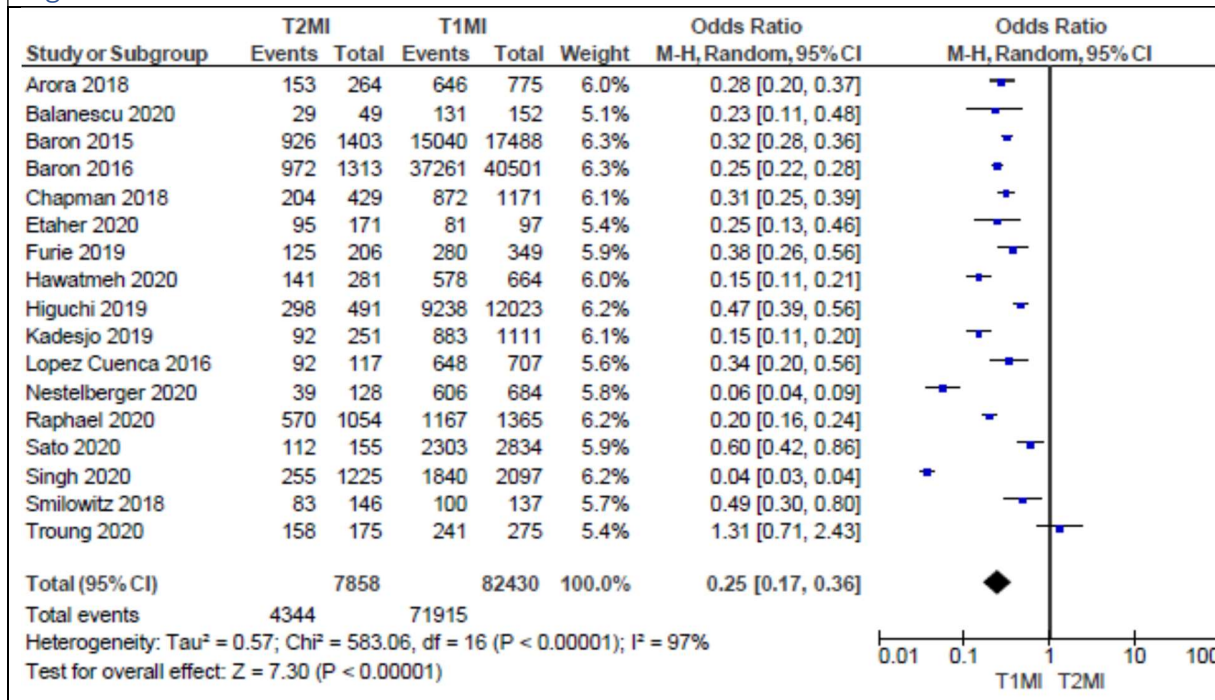

review only



Figure S38. Forest Plot. Percutaneous Coronary Intervention Performed.

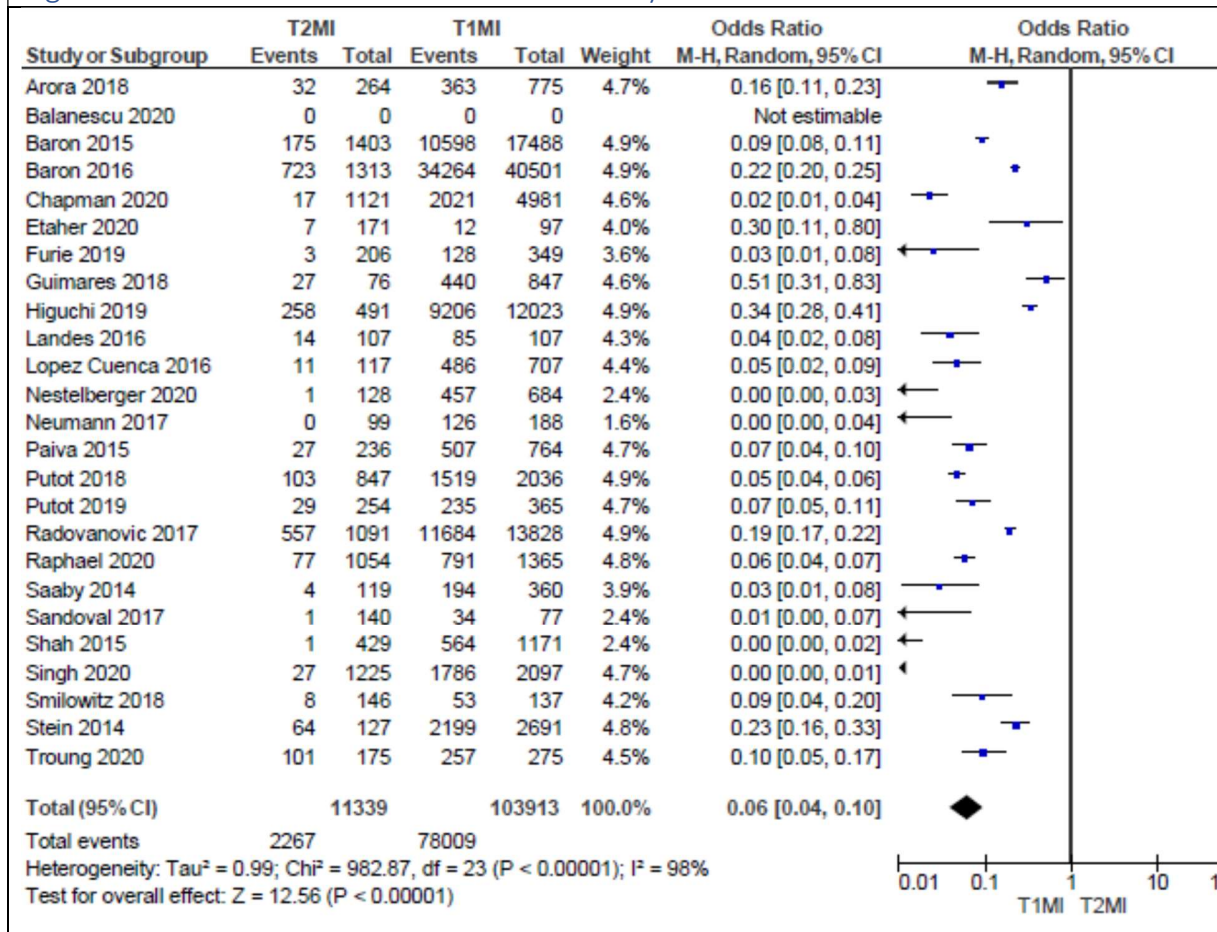

Figure S39. Forest Plot. Coronary Artery Bypass Graft Performed.



Figure S40. All cause In-hospital mortality. T2MI compared to T1MI.



Figure S41. Short-term all-cause mortality. T2MI compared to T1MI.

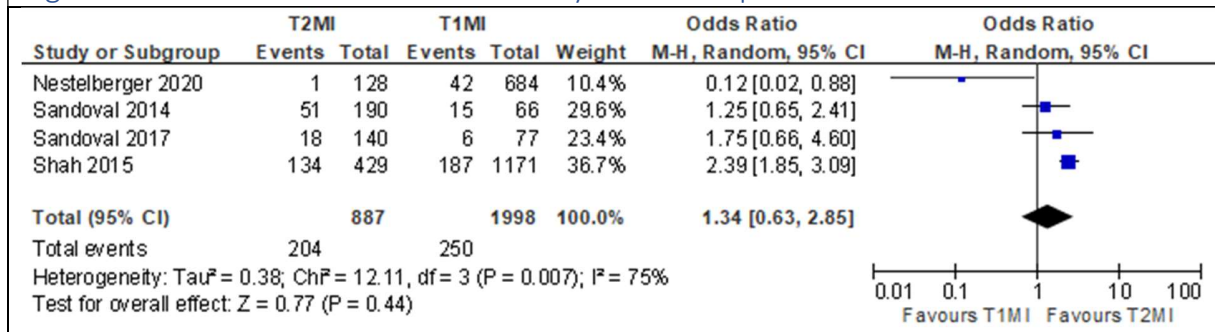

Figure S42. Two-year all-cause mortality. T2MI compared to T1MI.

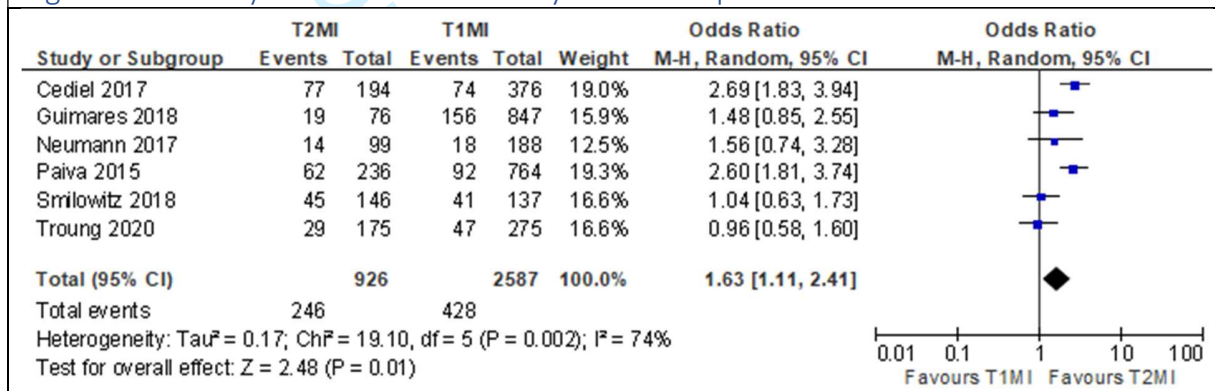

Figure S43. Three-year all-cause mortality. T2MI compared to T1MI.

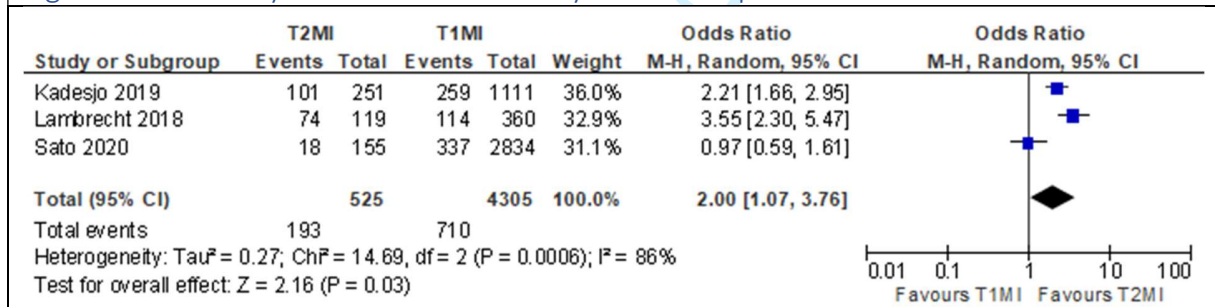

## References

1. Arora S, Strassle PD, Qamar A, Wheeler EN, Levine AL, Misenheimer JA, et al. Impact of Type 2 Myocardial Infarction (MI) on Hospital-Level MI Outcomes: Implications for Quality and Public Reporting. *Journal of the American Heart Association*. 2018;7(7).
2. Balanescu DV, Donisan T, Deswal A, Palaskas N, Song J, Lopez-Mattei J, et al. Acute myocardial infarction in a high-risk cancer population: Outcomes following conservative versus invasive management. *International journal of cardiology*. 2020;313:1-8.
3. Baron T, Hambraeus K, Sundström J, Erlinge D, Jernberg T, Lindahl B. Type 2 myocardial infarction in clinical practice. *Heart (British Cardiac Society)*. 2015;101(2):101-6.

- 1
- 2
- 3
- 4
- 5
- 6 4. Baron T, Hambraeus K, Sundström J, Erlinge D, Jernberg T, Lindahl B. Impact on Long-Term Mortality of Presence of Obstructive Coronary Artery Disease and Classification of Myocardial Infarction. *Am J Med.* 2016;129(4):398-406.
- 7
- 8
- 9 5. Bonaca MP, Wiviott SD, Braunwald E, Murphy SA, Ruff CT, Antman EM, et al. American College of Cardiology/American Heart Association/European Society of Cardiology/World Heart Federation universal definition of myocardial infarction classification system and the risk of cardiovascular death: observations from the TRITON-TIMI 38 (Trial to Assess Improvement in Therapeutic Outcomes by Optimizing Platelet Inhibition With Prasugrel-Thrombolysis in Myocardial Infarction 38). *Circulation.* 2012;125(4):577-83.
- 10
- 11
- 12
- 13
- 14
- 15 6. Cediël G, Gonzalez-Del-Hoyo M, Carrasquer A, Sanchez R, Boqué C, Bardají A. Outcomes with type 2 myocardial infarction compared with non-ischaemic myocardial injury. *Heart (British Cardiac Society).* 2017;103(8):616-22.
- 16
- 17
- 18 7. Chapman AR, Shah ASV, Lee KK, Anand A, Francis O, Adamson P, et al. Long-Term Outcomes in Patients With Type 2 Myocardial Infarction and Myocardial Injury. *Circulation.* 2018;137(12):1236-45.
- 19
- 20 8. Chapman AR, Adamson PD, Shah ASV, Anand A, Strachan FE, Ferry AV, et al. High-Sensitivity Cardiac Troponin and the Universal Definition of Myocardial Infarction. *Circulation.* 2020;141(3):161-71.
- 21
- 22 9. Consuegra-Sánchez L, Martínez-Díaz JJ, de Gadiana-Romualdo LG, Wasniewski S, Esteban-Torrella P, Clavel-Ruipérez FG, et al. No additional value of conventional and high-sensitivity cardiac troponin over clinical scoring systems in the differential diagnosis of type 1 vs. type 2 myocardial infarction. *Clinical chemistry and laboratory medicine.* 2018;56(5):857-64.
- 23
- 24 10. El-Haddad H, Robinson E, Swett K, Wells GL. Prognostic implications of type 2 myocardial infarctions. 2012.
- 25
- 26 11. Etaher A, Gibbs OJ, Saad YM, Frost S, Nguyen TL, Ferguson I, et al. Type-II myocardial infarction and chronic myocardial injury rates, invasive management, and 4-year mortality among consecutive patients undergoing high-sensitivity troponin T testing in the emergency department. *European heart journal Quality of care & clinical outcomes.* 2020;6(1):41-8.
- 27
- 28 12. Furie N, Israel A, Gilad L, Neuman G, Assad F, Ben-Zvi I, et al. Type 2 myocardial infarction in general medical wards: Clinical features, treatment, and prognosis in comparison with type 1 myocardial infarction. *Medicine.* 2019;98(41):e17404.
- 29
- 30 13. Guimarães PO, Leonardi S, Huang Z, Wallentin L, de Werf FV, Aylward PE, et al. Clinical features and outcomes of patients with type 2 myocardial infarction: Insights from the Thrombin Receptor Antagonist for Clinical Event Reduction in Acute Coronary Syndrome (TRACER) trial. *Am Heart J.* 2018;196:28-35.
- 31
- 32 14. Hawatmeh A, Thawabi M, Aggarwal R, Abirami C, Vavilin I, Wasty N, et al. Implications of Misclassification of Type 2 Myocardial Infarction on Clinical Outcomes. *Cardiovascular revascularization medicine : including molecular interventions.* 2020;21(2):176-9.
- 33
- 34 15. Higuchi S, Suzuki M, Horiuchi Y, Tanaka H, Saji M, Yoshino H, et al. Higher non-cardiac mortality and lesser impact of early revascularization in patients with type 2 compared to type 1 acute myocardial infarction: results from the Tokyo CCU Network registry. *Heart Vessels.* 2019;34(7):1140-7.
- 35
- 36 16. Javed U, Aftab W, Ambrose JA, Wessel RJ, Mouanoutoua M, Huang G, et al. Frequency of elevated troponin I and diagnosis of acute myocardial infarction. *The American journal of cardiology.* 2009;104(1):9-13.
- 37
- 38 17. Kadesjö E, Roos A, Siddiqui A, Desta L, Lundbäck M, Holzmann MJ. Acute versus chronic myocardial injury and long-term outcomes. *Heart (British Cardiac Society).* 2019;105(24):1905-12.
- 39
- 40 18. Lambrecht S, Sarkisian L, Saaby L, Poulsen TS, Gerke O, Hosbond S, et al. Different Causes of Death in Patients with Myocardial Infarction Type 1, Type 2, and Myocardial Injury. *Am J Med.* 2018;131(5):548-54.
- 41
- 42
- 43
- 44
- 45
- 46
- 47
- 48
- 49
- 50
- 51
- 52
- 53
- 54
- 55
- 56
- 57
- 58
- 59
- 60

19. Landes U, Bental T, Orvin K, Vaknin-Assa H, Rechavia E, Iakobishvili Z, et al. Type 2 myocardial infarction: A descriptive analysis and comparison with type 1 myocardial infarction. *Journal of cardiology*. 2016;67(1):51-6.
20. López-Cuenca A, Gómez-Molina M, Flores-Blanco PJ, Sánchez-Martínez M, García-Narbon A, De Las Heras-Gómez I, et al. Comparison between type-2 and type-1 myocardial infarction: clinical features, treatment strategies and outcomes. *J Geriatr Cardiol*. 2016;13(1):15-22.
21. Meigher S, Thode HC, Peacock WF, Bock JL, Gruberg L, Singer AJ. Causes of Elevated Cardiac Troponins in the Emergency Department and Their Associated Mortality. *Academic emergency medicine : official journal of the Society for Academic Emergency Medicine*. 2016;23(11):1267-73.
22. Nestelberger T, Boeddinghaus J, Badertscher P, Twerenbold R, Wildi K, Breitenbücher D, et al. Effect of Definition on Incidence and Prognosis of Type 2 Myocardial Infarction. *J Am Coll Cardiol*. 2017;70(13):1558-68.
23. Neumann JT, Sörensen NA, Rübsamen N, Ojeda F, Renné T, Qaderi V, et al. Discrimination of patients with type 2 myocardial infarction. *Eur Heart J*. 2017;38(47):3514-20.
24. Paiva L, Providência R, Barra S, Dinis P, Faustino AC, Gonçalves L. Universal definition of myocardial infarction: clinical insights. *Cardiology*. 2015;131(1):13-21.
25. Pandey AK, Duong T, Swiatkiewicz I, Daniels LB. A Comparison of Biomarker Rise in Type 1 and Type 2 Myocardial Infarction. *The American journal of medicine*. 2020;133(10):1203-8.
26. Putot A, Derrida SB, Zeller M, Avondo A, Ray P, Manckoundia P, et al. Short-Term Prognosis of Myocardial Injury, Type 1, and Type 2 Myocardial Infarction in the Emergency Unit. *Am J Med*. 2018;131(10):1209-19.
27. Putot A, Jeanmichel M, Chagué F, Avondo A, Ray P, Manckoundia P, et al. Type 1 or type 2 myocardial infarction in patients with a history of coronary artery disease: Data from the emergency department. *Journal of Clinical Medicine*. 2019;8(12).
28. Putot A, Jeanmichel M, Chague F, Manckoundia P, Cottin Y, Zeller M. Type 2 Myocardial Infarction: A Geriatric Population-based Model of Pathogenesis. *Aging and disease*. 2020;11(1):108-17.
29. Radovanovic D, Pilgrim T, Seifert B, Urban P, Pedrazzini G, Erne P. Type 2 myocardial infarction: incidence, presentation, treatment and outcome in routine clinical practice. *Journal of cardiovascular medicine (Hagerstown, Md)*. 2017;18(5):341-7.
30. Raphael CE, Roger VL, Sandoval Y, Singh M, Bell M, Lerman A, et al. Incidence, Trends, and Outcomes of Type 2 Myocardial Infarction in a Community Cohort. *Circulation*. 2020;141(6):454-63.
31. Reed GW, Horr S, Young L, Clevenger J, Malik U, Ellis SG, et al. Associations Between Cardiac Troponin, Mechanism of Myocardial Injury, and Long-Term Mortality After Noncardiac Vascular Surgery. *Journal of the American Heart Association*. 2017;6(6).
32. Saaby L, Poulsen TS, Hosbond S, Larsen TB, Pyndt Diederichsen AC, Hallas J, et al. Classification of myocardial infarction: frequency and features of type 2 myocardial infarction. *Am J Med*. 2013;126(9):789-97.
33. Saaby L, Poulsen TS, Diederichsen AC, Hosbond S, Larsen TB, Schmidt H, et al. Mortality rate in type 2 myocardial infarction: observations from an unselected hospital cohort. *Am J Med*. 2014;127(4):295-302.
34. Sandoval Y, Thordsen SE, Smith SW, Schulz KM, Murakami MM, Pearce LA, et al. Cardiac troponin changes to distinguish type 1 and type 2 myocardial infarction and 180-day mortality risk. *European heart journal Acute cardiovascular care*. 2014;3(4):317-25.
35. Sandoval Y, Smith SW, Sexter A, Thordsen SE, Bruen CA, Carlson MD, et al. Type 1 and 2 Myocardial Infarction and Myocardial Injury: Clinical Transition to High-Sensitivity Cardiac Troponin I. *Am J Med*. 2017;130(12):1431-9.e4.

- 1  
2  
3  
4  
5  
6 36. Sato R, Sakamoto K, Kaikita K, Tsujita K, Nakao K, Ozaki Y, et al. Long-Term Prognosis of Patients  
7 with Myocardial Infarction Type 1 and Type 2 with and without Involvement of Coronary Vasospasm.  
8 Journal of clinical medicine. 2020;9(6).  
9 37. Shah AS, McAllister DA, Mills R, Lee KK, Churchhouse AM, Fleming KM, et al. Sensitive troponin  
10 assay and the classification of myocardial infarction. Am J Med. 2015;128(5):493-501.e3.  
11 38. Singh A, Gupta A, DeFilippis EM, Qamar A, Biery DW, Almarzooq Z, et al. Cardiovascular  
12 Mortality After Type 1 and Type 2 Myocardial Infarction in Young Adults. Journal of the American  
13 College of Cardiology. 2020;75(9):1003-13.  
14 39. Smilowitz NR, Subramanyam P, Gianos E, Reynolds HR, Shah B, Sedlis SP. Treatment and  
15 outcomes of type 2 myocardial infarction and myocardial injury compared with type 1 myocardial  
16 infarction. Coronary artery disease. 2018;29(1):46-52.  
17 40. Stein GY, Herscovici G, Korenfeld R, Matetzky S, Gottlieb S, Alon D, et al. Type-II myocardial  
18 infarction--patient characteristics, management and outcomes. PLoS One. 2014;9(1):e84285.  
19 41. Truong HH, Victor MV, Imad MA, Kobalava ZD, Parvathy UT, Al-Zakwani I. Mortality and  
20 morbidity associated with type 2 myocardial infarction: A single-center study. Annals of Clinical  
21 Cardiology. 2020;2(2):70-9.  
22  
23  
24  
25  
26  
27  
28  
29  
30  
31  
32  
33  
34  
35  
36  
37  
38  
39  
40  
41  
42  
43  
44  
45  
46  
47  
48  
49  
50  
51  
52  
53  
54  
55  
56  
57  
58  
59  
60



## PRISMA 2020 Checklist

| Section and Topic             | Item # | Checklist item                                                                                                                                                                                                                                                                                       | Location where item is reported |
|-------------------------------|--------|------------------------------------------------------------------------------------------------------------------------------------------------------------------------------------------------------------------------------------------------------------------------------------------------------|---------------------------------|
| <b>TITLE</b>                  |        |                                                                                                                                                                                                                                                                                                      |                                 |
| Title                         | 1      | Identify the report as a systematic review.                                                                                                                                                                                                                                                          | 1                               |
| <b>ABSTRACT</b>               |        |                                                                                                                                                                                                                                                                                                      |                                 |
| Abstract                      | 2      | See the PRISMA 2020 for Abstracts checklist.                                                                                                                                                                                                                                                         | 3                               |
| <b>INTRODUCTION</b>           |        |                                                                                                                                                                                                                                                                                                      |                                 |
| Rationale                     | 3      | Describe the rationale for the review in the context of existing knowledge.                                                                                                                                                                                                                          | 4                               |
| Objectives                    | 4      | Provide an explicit statement of the objective(s) or question(s) the review addresses.                                                                                                                                                                                                               | 4                               |
| <b>METHODS</b>                |        |                                                                                                                                                                                                                                                                                                      |                                 |
| Eligibility criteria          | 5      | Specify the inclusion and exclusion criteria for the review and how studies were grouped for the syntheses.                                                                                                                                                                                          | 4                               |
| Information sources           | 6      | Specify all databases, registers, websites, organisations, reference lists and other sources searched or consulted to identify studies. Specify the date when each source was last searched or consulted.                                                                                            | 4                               |
| Search strategy               | 7      | Present the full search strategies for all databases, registers and websites, including any filters and limits used.                                                                                                                                                                                 | Supp                            |
| Selection process             | 8      | Specify the methods used to decide whether a study met the inclusion criteria of the review, including how many reviewers screened each record and each report retrieved, whether they worked independently, and if applicable, details of automation tools used in the process.                     | 4                               |
| Data collection process       | 9      | Specify the methods used to collect data from reports, including how many reviewers collected data from each report, whether they worked independently, any processes for obtaining or confirming data from study investigators, and if applicable, details of automation tools used in the process. | 4                               |
| Data items                    | 10a    | List and define all outcomes for which data were sought. Specify whether all results that were compatible with each outcome domain in each study were sought (e.g. for all measures, time points, analyses), and if not, the methods used to decide which results to collect.                        | 4                               |
|                               | 10b    | List and define all other variables for which data were sought (e.g. participant and intervention characteristics, funding sources). Describe any assumptions made about any missing or unclear information.                                                                                         | 4                               |
| Study risk of bias assessment | 11     | Specify the methods used to assess risk of bias in the included studies, including details of the tool(s) used, how many reviewers assessed each study and whether they worked independently, and if applicable, details of automation tools used in the process.                                    | 5                               |
| Effect measures               | 12     | Specify for each outcome the effect measure(s) (e.g. risk ratio, mean difference) used in the synthesis or presentation of results.                                                                                                                                                                  | 5                               |
| Synthesis methods             | 13a    | Describe the processes used to decide which studies were eligible for each synthesis (e.g. tabulating the study intervention characteristics and comparing against the planned groups for each synthesis (item #5)).                                                                                 | 5                               |
|                               | 13b    | Describe any methods required to prepare the data for presentation or synthesis, such as handling of missing summary statistics, or data conversions.                                                                                                                                                | 5                               |
|                               | 13c    | Describe any methods used to tabulate or visually display results of individual studies and syntheses.                                                                                                                                                                                               | 5                               |
|                               | 13d    | Describe any methods used to synthesize results and provide a rationale for the choice(s). If meta-analysis was performed, describe the model(s), method(s) to identify the presence and extent of statistical heterogeneity, and software package(s) used.                                          | 5                               |
|                               | 13e    | Describe any methods used to explore possible causes of heterogeneity among study results (e.g. subgroup analysis, meta-regression).                                                                                                                                                                 | 5                               |
|                               | 13f    | Describe any sensitivity analyses conducted to assess robustness of the synthesized results.                                                                                                                                                                                                         | N/A                             |
| Reporting bias assessment     | 14     | Describe any methods used to assess risk of bias due to missing results in a synthesis (arising from reporting biases).                                                                                                                                                                              | 5                               |
| Certainty                     | 15     | Describe any methods used to assess certainty (or confidence) in the body of evidence for an outcome.                                                                                                                                                                                                | N/A                             |



## PRISMA 2020 Checklist

| Section and Topic                              | Item # | Checklist item                                                                                                                                                                                                                                                                       | Location where item is reported |
|------------------------------------------------|--------|--------------------------------------------------------------------------------------------------------------------------------------------------------------------------------------------------------------------------------------------------------------------------------------|---------------------------------|
| assessment                                     |        |                                                                                                                                                                                                                                                                                      |                                 |
| <b>RESULTS</b>                                 |        |                                                                                                                                                                                                                                                                                      |                                 |
| Study selection                                | 16a    | Describe the results of the search and selection process, from the number of records identified in the search to the number of studies included in the review, ideally using a flow diagram.                                                                                         | 5                               |
|                                                | 16b    | Cite studies that might appear to meet the inclusion criteria, but which were excluded, and explain why they were excluded.                                                                                                                                                          | 5                               |
| Study characteristics                          | 17     | Cite each included study and present its characteristics.                                                                                                                                                                                                                            | Supp                            |
| Risk of bias in studies                        | 18     | Present assessments of risk of bias for each included study.                                                                                                                                                                                                                         | Supp                            |
| Results of individual studies                  | 19     | For all outcomes, present, for each study: (a) summary statistics for each group (where appropriate) and (b) an effect estimate and its precision (e.g. confidence/credible interval), ideally using structured tables or plots.                                                     | Supp                            |
| Results of syntheses                           | 20a    | For each synthesis, briefly summarise the characteristics and risk of bias among contributing studies.                                                                                                                                                                               | Supp                            |
|                                                | 20b    | Present results of all statistical syntheses conducted. If meta-analysis was done, present for each the summary estimate and its precision (e.g. confidence/credible interval) and measures of statistical heterogeneity. If comparing groups, describe the direction of the effect. | Supp                            |
|                                                | 20c    | Present results of all investigations of possible causes of heterogeneity among study results.                                                                                                                                                                                       | Supp                            |
|                                                | 20d    | Present results of all sensitivity analyses conducted to assess the robustness of the synthesized results.                                                                                                                                                                           | N/A                             |
| Reporting biases                               | 21     | Present assessments of risk of bias due to missing results (arising from reporting biases) for each synthesis assessed.                                                                                                                                                              | N/A                             |
| Certainty of evidence                          | 22     | Present assessments of certainty (or confidence) in the body of evidence for each outcome assessed.                                                                                                                                                                                  | N/A                             |
| <b>DISCUSSION</b>                              |        |                                                                                                                                                                                                                                                                                      |                                 |
| Discussion                                     | 23a    | Provide a general interpretation of the results in the context of other evidence.                                                                                                                                                                                                    | 7                               |
|                                                | 23b    | Discuss any limitations of the evidence included in the review.                                                                                                                                                                                                                      | 9                               |
|                                                | 23c    | Discuss any limitations of the review processes used.                                                                                                                                                                                                                                | 9                               |
|                                                | 23d    | Discuss implications of the results for practice, policy, and future research.                                                                                                                                                                                                       | 9                               |
| <b>OTHER INFORMATION</b>                       |        |                                                                                                                                                                                                                                                                                      |                                 |
| Registration and protocol                      | 24a    | Provide registration information for the review, including register name and registration number, or state that the review was not registered.                                                                                                                                       | 4                               |
|                                                | 24b    | Indicate where the review protocol can be accessed, or state that a protocol was not prepared.                                                                                                                                                                                       | 4                               |
|                                                | 24c    | Describe and explain any amendments to information provided at registration or in the protocol.                                                                                                                                                                                      | N/A                             |
| Support                                        | 25     | Describe sources of financial or non-financial support for the review, and the role of the funders or sponsors in the review.                                                                                                                                                        | N/A                             |
| Competing interests                            | 26     | Declare any competing interests of review authors.                                                                                                                                                                                                                                   | N/A                             |
| Availability of data, code and other materials | 27     | Report which of the following are publicly available and where they can be found: template data collection forms; data extracted from included studies; data used for all analyses; analytic code; any other materials used in the review.                                           | N/A                             |





# PRISMA 2020 Checklist

- 1
- 2
- 3
- 4
- 5
- 6
- 7
- 8
- 9
- 10
- 11
- 12
- 13
- 14
- 15
- 16
- 17
- 18
- 19
- 20
- 21
- 22
- 23
- 24
- 25
- 26
- 27
- 28
- 29
- 30
- 31
- 32
- 33
- 34
- 35
- 36
- 37
- 38
- 39
- 40
- 41
- 42
- 43
- 44
- 45
- 46
- 47

10.1136/bmj.n71

For more information, visit: <http://www.prisma-statement.org/>

For peer review only

# BMJ Open

## Diagnostic features, management, and prognosis of Type 2 myocardial infarction compared to Type 1 myocardial infarction: A systematic review and meta-analysis.

|                                 |                                                                                                                                                                                                                                                                                                                              |
|---------------------------------|------------------------------------------------------------------------------------------------------------------------------------------------------------------------------------------------------------------------------------------------------------------------------------------------------------------------------|
| Journal:                        | <i>BMJ Open</i>                                                                                                                                                                                                                                                                                                              |
| Manuscript ID                   | bmjopen-2021-055755.R2                                                                                                                                                                                                                                                                                                       |
| Article Type:                   | Original research                                                                                                                                                                                                                                                                                                            |
| Date Submitted by the Author:   | 30-Nov-2021                                                                                                                                                                                                                                                                                                                  |
| Complete List of Authors:       | White, Kyle; Princess Alexandra Hospital; University of Queensland Kinarivala, Mansey; Princess Alexandra Hospital, Internal Medicine and Clinical Epidemiology<br>Scott, Ian; University of Queensland, School of Clinical Medicine; Princess Alexandra Hospital, Department of Internal Medicine and Clinical Epidemiology |
| <b>Primary Subject Heading</b>: | Cardiovascular medicine                                                                                                                                                                                                                                                                                                      |
| Secondary Subject Heading:      | Cardiovascular medicine, Diagnostics                                                                                                                                                                                                                                                                                         |
| Keywords:                       | Coronary heart disease < CARDIOLOGY, Ischaemic heart disease < CARDIOLOGY, Myocardial infarction < CARDIOLOGY                                                                                                                                                                                                                |
|                                 |                                                                                                                                                                                                                                                                                                                              |

SCHOLARONE™  
Manuscripts



I, the Submitting Author has the right to grant and does grant on behalf of all authors of the Work (as defined in the below author licence), an exclusive licence and/or a non-exclusive licence for contributions from authors who are: i) UK Crown employees; ii) where BMJ has agreed a CC-BY licence shall apply, and/or iii) in accordance with the terms applicable for US Federal Government officers or employees acting as part of their official duties; on a worldwide, perpetual, irrevocable, royalty-free basis to BMJ Publishing Group Ltd ("BMJ") its licensees and where the relevant Journal is co-owned by BMJ to the co-owners of the Journal, to publish the Work in this journal and any other BMJ products and to exploit all rights, as set out in our [licence](#).

The Submitting Author accepts and understands that any supply made under these terms is made by BMJ to the Submitting Author unless you are acting as an employee on behalf of your employer or a postgraduate student of an affiliated institution which is paying any applicable article publishing charge ("APC") for Open Access articles. Where the Submitting Author wishes to make the Work available on an Open Access basis (and intends to pay the relevant APC), the terms of reuse of such Open Access shall be governed by a Creative Commons licence – details of these licences and which [Creative Commons](#) licence will apply to this Work are set out in our licence referred to above.

Other than as permitted in any relevant BMJ Author's Self Archiving Policies, I confirm this Work has not been accepted for publication elsewhere, is not being considered for publication elsewhere and does not duplicate material already published. I confirm all authors consent to publication of this Work and authorise the granting of this licence.

## Title Page

### Manuscript Title

Diagnostic features, management, and prognosis of Type 2 myocardial infarction compared to Type 1 myocardial infarction: A systematic review and meta-analysis.

### Authors

Dr Kyle White

Princess Alexandra Hospital, Brisbane, Australia

University of Queensland, Brisbane, Australia

BSc, MBBS, FRACP, FCICM, MPH

Dr Mansey Kinarivala

Princess Alexandra Hospital, Brisbane, Australia

MBBS, FRACP

Prof Ian Scott

Princess Alexandra Hospital, Brisbane, Australia

University of Queensland, Brisbane, Australia

MEd, MHA, MBBS, FRACP

### Corresponding Author

Dr Kyle White

Princess Alexandra Hospital

199 Ipswich Road, Wolloongabba, 4102

Ph: +61731762111

Email: [kyle.white@health.qld.gov.au](mailto:kyle.white@health.qld.gov.au)

### Manuscript Word Count

3535

## Abstract

### Importance

Distinguishing type 2 (T2MI) from type 1 myocardial infarction (T1MI) in clinical practice can be difficult, and the management and prognosis for T2MI remain uncertain.

### Objective

To compare precipitating factors, risk factors, investigations, management, and outcomes for T2MI and T1MI.

### Data Sources

MEDLINE and EMBASE databases as well as reference list of recent articles were searched January 2009 to December 2020 for term “type 2 myocardial infarction”.

### Study Selection

Studies were included if they analysed if universal definition of MI was used and reported quantitative data on at least one variable of interest.

### Data Extraction and Synthesis

Data was pooled using random-effect meta-analysis. Risk of bias was assessed using Newcastle-Ottawa Quality Assessment Form. Preferred Reporting Items for Systematic Reviews and Meta-analyses (PRISMA) guidelines were followed. All review stages were conducted by two reviewers.

### Main Outcomes and Measures

Risk factors, presenting symptoms, cardiac investigations such as troponin and angiogram, management, and outcomes such as mortality.

### Results

40 cohort studies comprising 98,930 T1MI and 13,803 T2MI patients were included. Compared to T1MI, T2MI patients were: more likely to have pre-existing chronic kidney (OR 1.87; 95%CI 1.53-2.28) and chronic heart failure (OR 2.35; 95%CI 1.82-3.03), less likely to present with typical cardiac symptoms of chest pain (OR 0.19; 95%CI 0.13-0.26) and more likely to present with dyspnoea (OR 2.64; 95%CI 1.86-3.74); more likely to demonstrate non-specific ST-T wave changes on electrocardiography (OR 2.62; 95%CI 1.81-3.79) and less likely to show ST elevation (OR 0.22; 95%CI 0.17-0.28); less likely to undergo coronary angiography (OR 0.09; 95%CI 0.06-0.12) and percutaneous coronary intervention (OR 0.09; 95%CI 0.06-0.12) or receive cardioprotective medications, such as statins (OR 0.25; 95%CI 0.16-0.38) and beta-blockers (OR 0.45; 95%CI 0.33-0.63). T2MI had more risk of all cause one-year mortality (OR 3.11; 95%CI 1.91-5.08), with no differences in short-term mortality (OR 1.34; 95%CI 0.63-2.85).

### Conclusion and Relevance

This review has identified clinical, management and survival differences between T2MI and T1MI with greater precision and scope than previously reported. Differential use of coronary

1  
2  
3 revascularisation and cardioprotective medications highlight ongoing uncertainty of their utility in  
4 T2MI compared to T1MI.  
5  
6  
7  
8  
9  
10  
11  
12

## 13 Strength and Limitations

- 14 • Inclusion of all contemporary cohort studies in the troponin era
  - 15 • Large patient population of T2MI and T1MI patients analysed allowing high level of precision
  - 16 • Wide array of clinically significant variables assessed providing a comprehensive analysis
  - 17 • Analysis of crude mortality only was possible due to lack of individual patient data
- 18  
19  
20  
21  
22  
23  
24  
25  
26  
27  
28  
29  
30  
31  
32  
33  
34  
35  
36  
37  
38  
39  
40  
41  
42  
43  
44  
45  
46  
47  
48  
49  
50  
51  
52  
53  
54  
55  
56  
57  
58  
59  
60

## Introduction

The clinical definition of myocardial infarction has evolved over time. The 2007 Universal Definition of Myocardial Infarction included a subset of MI that was secondary to aetiologies unrelated to underlying occlusive coronary artery disease (1). In 2012, the Third Universal Definition of Myocardial Infarction Consensus Document (2) gave rise to the aetiological distinction between T1MI, defined as MI due to plaque erosion and/or rupture, and T2MI, defined as MI caused by increased oxygen demand or decreased blood supply, in the absence of acute plaque rupture or coronary thrombosis. More recently, in 2018, the Fourth Universal definition of MI updated concepts of T2MI regarding specific situations associated with oxygen demand and supply imbalance and the relevance of the presence or absence of underlying coronary artery disease to therapy and prognosis (3). (see on-line supplement Table S1 for more detail)

In clinical practice, distinguishing T2MI from T1MI based on clinical presentation, electrocardiograph (ECG) features and cardiac troponin (cTn) values can be difficult. In the absence of randomised controlled trials that have evaluated different investigational and therapeutic interventions in patients with T2MI, uncertainty remains around the appropriate management of such patients, particularly those with known or suspected coronary artery disease. Past reviews have assessed one or more attributes of T2MI in comparison to T1MI (4-8) but, to our knowledge, none have undertaken a comprehensive analysis of symptoms, physical signs, investigation results, management regimens and clinical outcomes, both short and long term, of T2MI versus T1MI.

We undertook a systematic review of observational studies with the aims of identifying diagnostic and investigational findings which can assist clinicians to better distinguish T2MI from T1MI, and compare T2MI with T1MI in defining differences in management strategies and clinical outcomes.

## Methods

### Study design

The review was undertaken in accordance with recommendations of the Cochrane Collaboration and Preferred Reporting Items for Systematic Reviews and Meta-Analyses (PRISMA) statement (9). Our review was registered on PROSPERO prior to commencement (Registration number: CRD42021237746). MEDLINE and EMBASE databases were searched for all studies published between January 1st, 2009, and December 31st, 2020, using search terms to identify all studies related to T2MI (see Table S2). Reference lists of all relevant articles were also assessed to identify additional relevant studies. The study PRISMA flowchart is shown in Figure S1. January 2009 was chosen as the start date for the literature search in order to restrict our analyses to contemporary studies in the troponin era that employed formal definitions of T2MI which were only devised from 2007 onwards.

Studies were included if they: 1) compared patient populations with T2MI and T1MI, 2) used a universal definition of MI, 3) included at least one variable of interest, 4) were available as full text in English and 5) were either a randomised control trial or comparative observational study. Studies were excluded if: 1) no full text was available, 2) duplicate data was utilised or 3) less than 200 participants in total were included. Initial screening of titles and abstracts for eligible studies was

1  
2  
3 performed independently by two authors (MK, KW), as was full text review for inclusion, with any  
4 differences in review settled by consensus agreement.  
5

## 6 7 Data collection and synthesis

8 Data pertaining to all variables of interest were collected from all included studies using a  
9 standardised proforma by one author (MK) and independently reviewed by the second author (KW).  
10 These variables comprised: study dates, design, sample size, definition used to define T2MI and  
11 T1MI, patient demographics, pre-existing medical conditions, precipitating factors, clinical  
12 symptoms, ECG findings, laboratory values, echocardiographic results, any clinical interventions or  
13 medical treatments administered, and clinical outcomes observed.  
14  
15

16  
17 Data on variables reported as, or able to be converted to, raw numbers, were pooled from all studies  
18 and subject to comparative meta-analysis using Review Manager (RevMan, Computer program.  
19 Version 5.3. Copenhagen: The Nordic Cochrane Centre, The Cochrane Collaboration, 2014). For each  
20 variable, the odds ratio (OR) comparing T2MI to T1MI, and its 95% confidence interval (CI), was  
21 calculated and weighted using the random effects method. As specified in the registered study  
22 protocol, the random effects method was used in anticipation of study heterogeneity of at least  
23 moderate degree ( $I^2$  statistic of heterogeneity >50%) (10). In addition to the weighted OR, we also  
24 report the crude total event rates for each variable subject to meta-analysis in order to provide a  
25 more clinically meaningful estimate of the prevalence of these events in each patient group in view  
26 of the large sample sizes. Studies reporting mean or median values only were reproduced as  
27 reported in the original study.  
28  
29

30  
31 Risk of bias within each study was assessed using the Newcastle-Ottawa quality assessment tool for  
32 cohort studies (11, 12), with scores 7-8 denoting good quality studies, 4-6 fair quality, and 0-3 poor  
33 quality.  
34  
35

## 36 37 Patient and Public Involvement

38 We did not seek patient or public comment in designing the study.  
39  
40

## 41 42 Results

43 A total of 40 studies were included for analysis (13-52) and their characteristics are summarised in  
44 Table S3. They comprised a total of 127,620 participants of whom 98,930 participants (77.5%) were  
45 classified as T1MI and 13,803 (10.8%) as T2MI. In the following text, we report key findings; more  
46 information and forest plots for each analysis involving more than one study and more than 100  
47 total cases can be found in the on-line supplement, Figures S2-S44.  
48  
49

50 The 2007 definition (1) was used in 7 (17.5%) studies (15, 16, 27, 29, 43, 44, 51, 53), the 2012  
51 definition (2) in 25 (62.5%) studies (13, 17, 19-21, 23-26, 30-35, 37, 39, 40, 42, 45-48, 50, 52), and  
52 the 2018 definition (3) in 8 (20%) studies (14, 18, 22, 28, 36, 38, 41, 49). Of the 40 studies, 17 (42.5%)  
53 were prospective (15, 16, 18, 19, 22, 29, 33, 34, 36, 37, 43, 44, 46-48, 50, 51, 53) and 23 (57.5%)  
54 were retrospective (13, 14, 17, 20, 21, 23-28, 30-32, 35, 38-42, 46, 49, 52).  
55  
56

## 57 58 Risk of bias assessment

59  
60



1  
2  
3 Of the 40 studies, 31 (77.5%) were assessed as good quality (13, 15-19, 22, 23, 27-35, 37-46, 48, 52,  
4 53), 6 (15%) as fair quality (14, 24-26, 49), and 3 (7.5%) as poor quality (20, 36, 47), as summarised  
5 in Table S4. Selection bias resulting in unrepresentative cohorts such as admission criteria to  
6 coronary care units or entry criteria into MI registries favouring T1MI (14, 20, 24-26, 36, 47, 49),  
7 absence of independent adjudication of MI type as T1MI or T2MI (36, 38, 47), non-comparability of  
8 T1MI and T2MI cohorts (20, 24, 25, 47), poorly specified outcome measures (36, 38, 47) and short  
9 follow-up period resulting in few events (14, 20, 24, 36) comprised most forms of bias.

## 13 Participant characteristics

15 Patients with T1MI had a median age range of 60-82 years in the included studies that did not select  
16 a specific age population, compared to a median age range of 62-81 years in patients with T2MI. The  
17 sex distribution was also similar, with 58.4% and 53% of patients with T1MI and T2MI being male  
18 respectively.

21 Regarding pre-existing medical conditions (Table 1), T2MI patients compared to T1MI patients were  
22 more likely to have chronic kidney disease (22.8% vs 17.3%; OR 1.87; 95%CI 1.53-2.28), chronic heart  
23 failure (13.1% vs 7.6%; OR 2.35; 95%CI 1.82-3.03), atrial fibrillation (22.9% vs 6.1%; OR 3.02; 95%CI  
24 2.29-3.99), and hypertension (66.4% vs 63.4%; OR 1.22; 95%CI 1.03-1.45). Patients with T2MI were  
25 less likely to have dyslipidaemia (43.4% vs 45.9%; OR 0.74; 95%CI 0.58-0.94) and smoking history  
26 (34.7% vs 52.8%; OR 0.6; 95%CI 0.49-0.73). There was no difference in the prevalence of type 2  
27 diabetes mellitus or ischaemic heart disease between the two groups.

## 31 Precipitating factors

33 Less than half of the studies (n=17; 43%) included data on precipitating factors associated with T2MI  
34 (13, 15, 17, 19, 21-24, 27, 31, 32, 35, 40, 44, 45, 50, 51, 53). Data on each precipitating factor was  
35 not consistently available across the studies, for example only 17 studies representing 45% of T2MI  
36 patients assessed presence of arrhythmia

38 The most common precipitants were sepsis (35.9%) and heart failure (35.9%), followed by arrhythmia  
39 (29.8%) (Table S5), with non-cardiac surgery being deemed a cause in 12.2% of cases where data for  
40 this variable were collected.

## 43 Presenting clinical features

45 As summarised in Table S6, compared to T1MI patients, T2MI patients were less likely to present  
46 with typical cardiac symptoms of chest pain (58.6% vs 88.4%; OR 0.19; 95%CI 0.13-0.26) or  
47 discomfort in the arm or shoulder (8.5% vs 35%; OR 0.18; 95%CI 0.11-0.3), but more likely to present  
48 with dyspnoea (27.1% vs 10.6%; OR 2.64; 95%CI 1.86-3.74).

## 51 Investigations

53 ECG findings on presentation (Table S7) such as ST elevation (14.1% vs 44.2%; OR 0.22; 95%CI 0.17-  
54 0.28) and pathological Q waves (6.7% vs 20.8%; OR 0.38; 95%CI 0.20-0.71) were less evident in T2MI  
55 than in T1MI. In contrast, non-specific ST-T wave changes (24.7% vs 10.8%; OR 2.62; 95%CI 1.81-  
56 3.79), and atrial arrhythmias (21% vs 6.6%; OR 4.99; 95%CI 3.14-7.93) were more common among  
57 T2MI. No differences between groups were seen in the frequency of ST depression or T wave  
58 inversion.  
59  
60

1  
2  
3 Among the 40 studies, four studies (10%) reported the use of high-sensitivity cardiac troponin (cTn)  
4 assays, 21 (53%) reported sensitive assays, and 14 (35%) did not specify what generation assay was  
5 used (Table S3b). The results of troponin assays were reported in 26 (65%) studies, specific to cTnI  
6 assays in 19 studies, cTnT in 5, both assays in one, while another did not specify the assay used. Only  
7 two of these studies reporting troponin failed to state the upper limit of normal (ULN) of the assay  
8 used (23, 31). The troponin assays, and therefore units and reference ranges, varied between the  
9 studies, preventing direct comparison of troponin values. As a result, we converted troponin values  
10 to a multiple of the upper limit of normal for each assay to allow direct comparison (Table S8). For  
11 peak troponin, patients with T1MI had a higher and wider range of between 5 and 1702 times the  
12 ULN compared to patients with T2MI with a range of 2.8-447 times the ULN. Studies yielded mixed  
13 results as to whether the magnitude of change (or delta) in serial cardiac troponin assays was more  
14 predictive of T2MI or T1MI compared to absolute values of peak levels (33). Lowering the diagnostic  
15 threshold for troponin with the advent of more sensitive assays has increased the numbers of  
16 patients identified with T2MI by up to 50% (36), with more recent studies showing the incidence of  
17 T2MI equalling or exceeding that of T1MI (15, 33, 36).  
18  
19  
20  
21  
22

23  
24 Echocardiography was less frequently performed among T2MI than T1MI patients (47.9% vs 55.5%;  
25 OR 0.44; 95%CI 0.20-0.96) and when reported (Table S7), there was no difference in the prevalence  
26 of regional wall motion abnormalities or the level of left ventricular (LV) function, with reported  
27 median LV ejection fraction being 42.3%-55% in T1MI patients and 40%-56% in T2MI patients.  
28  
29

30 Coronary angiography was also less frequently performed among T2MI than in T1MI patients (34.1%  
31 vs 85.5%; OR 0.09; 95%CI 0.06-0.12, Table S7). When performed, T2MI patients were less likely to  
32 demonstrate obstructive coronary artery disease (34% vs 44.9%; OR 0.16; 95%CI 0.05-0.54), with  
33 obstruction variously defined as 50%-70% occlusion of one or more vessels.  
34  
35

## 36 Management

37 T2MI patients, compared to T1MI patients, were significantly less likely to receive conventional  
38 cardioprotective medications (Table 2), comprising beta-blockers (58.3% vs 76.3%; OR 0.45; 95%CI  
39 0.33-0.63), anti-platelet agents (70.8% vs 88.5%; OR 0.24; 95%CI 0.16-0.38) and statins (52.9% vs  
40 87.6%; OR 0.25; 95%CI 0.16-0.38). Of note, T2MI patients were more likely to receive diuretics  
41 (44.8% vs 13.6%; OR 1.98; 95%CI 1.37-2.86) or anti-coagulants (28.9% vs 25.2%; OR 1.87; 95%CI  
42 1.06-3.30).  
43  
44  
45

46 Percutaneous coronary intervention (PCI) (21.1% vs 78%; OR 0.06; 95%CI 0.04-0.10) and coronary  
47 artery bypass surgery (2.9% vs 6.4%; OR 0.23; 95%CI 0.12-0.45) were also significantly less likely to  
48 be performed in T2MI patients than T1MI patients.  
49  
50

## 51 Prognosis

52 T2MI patients had significantly increased risk of all-cause death compared to patients with T1MI in  
53 both short- and long-term follow-up (Table 3). Specifically, compared to T1MI patients, T2MI  
54 demonstrated increased all-cause mortality in-hospital (12.5% vs 5.8%; OR 1.94; 95%CI 1.35-2.79,  
55 Figure S40), at one-year (18.9% vs 5.4%; OR 3.11; 95%CI 1.91-5.08, Figure 1) and at 5 to 10 years,  
56 (53.7% vs 28.5%, OR 3.24; 95%CI 2.73-3.84, Figure 2). In contrast, there were no differences  
57  
58  
59  
60

1  
2  
3 between T2MI and T1MI patients in the risk of short-term mortality at 120-180 days (23.0% vs  
4 12.5%; OR 1.34; 95%CI 0.63-2.85).  
5  
6

## 7 Discussion

8  
9 To our knowledge, this is the most comprehensive systematic review and meta-analysis of  
10 contemporary studies comparing T2MI with T1MI in the troponin era, comprising 127,620 patients  
11 from 40 cohort studies across 14 countries, and which used formal definitions of T2MI and T1MI. Up  
12 to three quarters of all myocardial infarctions in routine care can be T2MI (33, 34), and distinguishing  
13 T2MI from T1MI on clinical criteria is often challenging. The management strategies used by  
14 clinicians in real-world practice for T2MI often vary, and the clinical outcomes of T2MI compared to  
15 T1MI, particularly over the long term, have been uncertain. This review provides information that  
16 helps characterise these two groups of patients according to multiple variables and which may assist  
17 in clinical decision-making and prognostication.  
18  
19

20  
21 In this review, T2MI patients demonstrated more medical comorbidities than T1MI patients, as  
22 noted in a recent meta-analysis (6). Our review highlighted the much higher incidence of pre-existing  
23 generalised vascular disease, atrial fibrillation, renal impairment, and heart failure among T2MI  
24 patients.  
25  
26

27 Sepsis (10, 16, 27) and anaemia (51) ranked highly as triggers, together with other acute cardiac  
28 events such as valve dysfunction or arrhythmias. In one study, a more favourable prognosis in T2MI  
29 was seen when the principal trigger was arrhythmia compared to non-cardiac surgery, hypotension,  
30 anaemia or hypoxia (29). In another study, shock syndromes were triggers portending a worse  
31 prognosis compared to all other triggers (32). In our analysis, non-cardiac surgery as a trigger was  
32 less frequent than reported by other investigators (26) whereby peri-operative stressors including  
33 blood loss, anaesthesia induced hypotension and wound infections cause imbalance in myocardial  
34 contractility, oxygen demand and blood flow (54).  
35  
36  
37

38 Analysis of cTn levels showed uniformly higher values in T1MI than T2MI which accord with one  
39 review (5) reporting cTn values 30% to 94% higher in patients with T1MI, and which other  
40 investigators regard as being highly specific diagnostic markers for T1MI (54).  
41  
42  
43

44 Coronary angiography and revascularisation were both performed much less frequently in T2MI than  
45 in T1MI patients. Treating physicians may perceive invasive strategies as being contraindicated or  
46 potentially harmful in the presence of various co-morbidities more commonly seen in T2MI and  
47 associated with competing mortality risk. In our pooled data, only one in three T2MI patients who  
48 underwent angiography demonstrated obstructive coronary artery disease, although this figure may  
49 be an underestimate due to selection bias whereby younger, less multi-morbid patients  
50 preferentially underwent angiography. In the CASABLANCA cohort study, which enrolled patients  
51 with high likelihood of coronary or peripheral artery disease and subjected them to peripheral or  
52 coronary angiography, of all those who subsequently suffered incident T2MI, almost half (47.7%)  
53 demonstrated  $\geq 70\%$  stenosis in at least 2 major coronary arteries (55). These conflicting findings  
54 question whether patients presenting with T2MI would benefit from routine use of invasive  
55 strategies that define coronary anatomy and, if plaque rupture or critical stenoses are seen, prompt  
56 revascularisation, with resultant improvement in patient outcomes. In one study (18), angiography  
57  
58  
59  
60

1  
2  
3 unmasked acute plaque rupture in 29% of patients classified as T2MI. In another study, among 27 of  
4 236 patients with T2MI who underwent revascularisation, the odds of all-cause death were reduced  
5 by 67% compared to the remaining 209 non-revascularised patients (23). In contrast, in a third more  
6 rigorous study comparing T2MI versus T1MI patients who received or did not receive PCI within 24  
7 hours of symptom onset, after adjusting results using multivariate logistic regression analysis and  
8 inverted probability weighting,(15) in-hospital mortality was lower in those with T1MI receiving PCI  
9 (OR 0.47; 95% CI 0.40–0.55;  $p < 0.001$ ), but not in those with T2MI receiving PCI (OR 1.09; 95% CI  
10 0.62–1.94;  $p = 0.763$ ). However, all these studies are observational, so completion of randomised  
11 trials, such as the Appropriateness of Coronary investigation in myocardial injury and Type 2  
12 myocardial infarction (ACT-2) trial, which is currently in recruitment (54), will hopefully provide a  
13 more definitive answer.  
14  
15  
16  
17

18  
19 Given that a third of T2MI patients had pre-existing coronary artery disease and most of the  
20 remainder had one or more cardiovascular risk factors, the relative underuse of cardioprotective  
21 medications is perplexing. It may reflect either clinician uncertainty around their cardioprotective  
22 utility in T2MI, or concerns about the potential for adverse interactions with other drugs or diseases  
23 commonly seen in multi-morbid T2MI patients. The higher use of diuretics in the T2MI population  
24 likely reflects the higher prevalence of heart failure and hypertension. Recognizing the  
25 heterogeneous mechanisms or conditions leading to T2MI, a phenotype specific-approach to the  
26 design of future trials will be useful in identifying effective therapies.  
27  
28  
29

30 An important finding is the much higher all-cause in-hospital and one-year mortality in T2MI  
31 compared to T1MI patients, similar to the two-fold greater mortality rate in T2MI noted in a recent  
32 systematic review of 9 studies (8). In our review, this excess mortality was not driven by an excess of  
33 cardiovascular deaths, and likely reflects the competing risks of multiple co-morbidities, rather than  
34 underlying obstructive coronary artery disease which was seen in 30-50% of T2MI patients (26, 31).  
35 Studies yielded mixed results as to whether coronary artery disease is an independent predictor of  
36 T2MI (20, 42), while others question the angiographic distinction between T2MI and T1MI. For  
37 example, in a study of 450 consecutive patients with MI who all underwent coronary angiography  
38 within 24 hours of symptom onset, 145 (32.2%) patients had 'true' T1MI (acute atherothrombosis  
39 and no systemic triggers), 114 (25.3%) had 'true' T2MI (no atherothrombosis and systemic triggers),  
40 61 (13.6%) patients had neither, and 130 (28.9%) patients had both (41). This yields a discordance of  
41 angiographic and clinical definitions of MI type in 42.5% of patients.  
42  
43  
44  
45

46 Our review has several limitations. First, in the absence of individual patient data from all included  
47 studies, we could not perform multivariate regression analysis in identifying independent predictors  
48 of diagnosis, management, or prognosis of T2MI. Second, we did not perform separate analyses of  
49 studies according to each version of the Universal Definition of MI or to different troponin  
50 thresholds to define MI, which may impact management and prognosis. However, potential  
51 misclassification bias was addressed in a recent study which showed little change in MI classification  
52 as type 1 or 2 in the same cohort of emergency admissions to whom the 3<sup>rd</sup> and 4<sup>th</sup> universal  
53 definitions were applied(55). In another study which compared separate T2MI cohorts, as defined by  
54 the 2007 and the 2012 definitions, co-morbidities and use of cardioprotective medications were less  
55 frequent in the 2012 cohort, likely due to less severe MIs being included as a result of using more  
56 sensitive troponin assays (22). Third, we did not collect haemodynamic variables or other  
57  
58  
59  
60

1  
2  
3 physiological measures such as haemoglobin levels and glomerular filtration rate in analysing clinical  
4 presentations as these were very inconsistently reported. Fourth, our mortality meta-analyses relied  
5 on crude mortality rates reported in each study, with 55% of studies (15-19, 22-28, 30, 31, 34, 35,  
6 37, 40-42, 45, 46, 53) also undertaking multivariate regression and/or competing risk analyses and  
7 reporting adjusted mortality rates. For the T2MI cohorts in general, these rates tended to be lower  
8 and the differences in rates compared to those of T1MI were of smaller magnitude. Fifth, we did not  
9 analyse 30-day readmission rates as these were reported in only three studies (13, 14, 23). Sixth, we  
10 did not perform sensitivity analyses comparing results of prospective versus retrospective studies, as  
11 neither group demonstrated less or more risk of bias than the other, or compare results of good  
12 quality studies against fair/poor quality studies as the latter comprised only 16.7% of all patients.  
13 Finally, we did not attempt sub-analyses based on risk stratification using validated risk scores or  
14 seek to identify predictive models for mortality, as such analyses were reported in only two studies  
15 (26, 40).  
16  
17  
18  
19  
20

21 The strengths of this review are the inclusion of all contemporary cohort studies in the troponin era  
22 that employed formal definitions of T2MI, analysis of a broader range of variables than those of  
23 previous studies, and the more precise discernment of clinically meaningful differences between the  
24 two MI populations in patient characteristics, clinical presentation, patterns of care and outcomes.  
25 As studies originated from several different jurisdictions, we believe our findings are generalisable to  
26 different healthcare systems, although absolute values for some measures did vary between  
27 countries. We are aware of a large US cohort study published since completion of our review (56)  
28 which compared T1MI with T2MI patients, but was limited by misclassification bias (relying on  
29 administrative hospital discharge data containing an International Classification of Diseases-10th  
30 Revision code specific for type 2 MI, rather than a registry or chart diagnosis based on a formal MI  
31 definition), short study period of 3 months in late 2017, and inability to analyse clinical features,  
32 investigation results, medication use, coronary anatomy, and post-discharge mortality due to their  
33 omission in the datasets.  
34  
35  
36  
37  
38

## 39 Conclusion

40 This review has identified differences between T2MI and T1MI patients in presenting clinical  
41 features, investigation and management profiles, and clinical outcomes. These findings may assist  
42 clinicians to better recognise T2MI and advise patients about its sequelae, and inform hospital  
43 coding and epidemiological trending, quality of care indicators and inter-hospital benchmarking of  
44 performance relating to the care of patients with T2MI.  
45  
46  
47

48 The review has also defined persisting gaps in our understanding of the utility and prognostic effects  
49 of invasive investigations, revascularization strategies and cardioprotective medications in T2MI  
50 patients that warrant more randomised trials that enrol such patients.  
51  
52  
53  
54  
55  
56  
57  
58  
59  
60

## Tables

**Table 1. Pre-existing medical conditions in patients with T2MI versus T1MI.**

| Pre-existing medical condition | T2MI                                            |                          |       | T1MI                                            |                          |       | Odds ratio* (95% CI) |
|--------------------------------|-------------------------------------------------|--------------------------|-------|-------------------------------------------------|--------------------------|-------|----------------------|
|                                | Number of patients with the specified condition | Total number of patients | %     | Number of patients with the specified condition | Total number of patients | %     |                      |
| CAD                            | 3352                                            | 10303                    | 32.5% | 22222                                           | 92725                    | 24%   | 1.1 [0.93, 1.31]     |
| Type 2 DM                      | 3044                                            | 12157                    | 25%   | 23287                                           | 93345                    | 24.9% | 0.97 [0.85, 1.10]    |
| HTN                            | 7536                                            | 11021                    | 66.4% | 55782                                           | 88017                    | 63.4% | 1.22 [1.03, 1.45]    |
| Dyslipidaemia                  | 4626                                            | 10652                    | 43.4% | 40099                                           | 87366                    | 45.9% | 0.74 [0.58, 0.94]    |
| Smoker                         | 3448                                            | 9929                     | 34.7% | 39548                                           | 74889                    | 52.8% | 0.60 [0.49, 0.73]    |
| Obesity                        | 1225                                            | 3672                     | 33.4% | 30963                                           | 56970                    | 54.3% | 0.63 [0.46, 0.87]    |
| Renal failure                  | 1378                                            | 6040                     | 22.8% | 11300                                           | 65394                    | 17.3% | 1.87 [1.53, 2.28]    |
| Heart failure                  | 1661                                            | 8873                     | 13.1% | 5617                                            | 74212                    | 7.6%  | 2.35 [1.82, 3.03]    |
| PVD                            | 584                                             | 5856                     | 10.0% | 2066                                            | 41280                    | 5.0%  | 1.33 [1.05, 1.69]    |
| CVD                            | 969                                             | 8538                     | 11.3% | 6060                                            | 87822                    | 6.9%  | 1.47 [1.27, 1.71]    |
| Atrial fibrillation            | 836                                             | 3645                     | 22.9% | 1220                                            | 19843                    | 6.1%  | 3.02 [2.29, 3.99]    |
| COPD                           | 800                                             | 5018                     | 15.9% | 823                                             | 48375                    | 1.7%  | 1.94 [1.22, 3.08]    |
| Illicit drug Use               | 46                                              | 204                      | 22.5% | 8                                               | 220                      | 3.6%  | 8.15 [1.03, 64.46]   |

\*Comparing T2MI with T1MI patients, with odds ratio adjusted according to study weighting using random effects meta-analysis  
Abbreviations: CAD= coronary heart disease, DM= diabetes mellitus, HTN= hypertension, BMI= body mass index, PVD= peripheral vascular disease, CVD= cerebrovascular disease, COPD= chronic obstructive pulmonary disease

Table 2. Pharmacological management and invasive interventions in patients with T2MI versus T1MI.

| Intervention                                                                                                                                                                                                                                                               | T2MI                                |                          |       | T1MI                                |                          |       | Odds ratio*<br>(95% CI) |
|----------------------------------------------------------------------------------------------------------------------------------------------------------------------------------------------------------------------------------------------------------------------------|-------------------------------------|--------------------------|-------|-------------------------------------|--------------------------|-------|-------------------------|
|                                                                                                                                                                                                                                                                            | No. patients receiving intervention | Total number of patients | %     | No. patients receiving intervention | Total number of patients | %     |                         |
| <b>Medication</b>                                                                                                                                                                                                                                                          |                                     |                          |       |                                     |                          |       |                         |
| Beta blockers                                                                                                                                                                                                                                                              | 4967                                | 8523                     | 58.3% | 63431                               | 83157                    | 76.3% | 0.45 [0.33, 0.63]       |
| ACEI / ARB                                                                                                                                                                                                                                                                 | 3766                                | 7842                     | 48%   | 56253                               | 81793                    | 68.8% | 0.52 [0.40, 0.67]       |
| Anti-platelets                                                                                                                                                                                                                                                             | 5087                                | 8599                     | 70.8% | 74377                               | 84004                    | 88.5% | 0.25 [0.16, 0.38]       |
| Anti-coagulants                                                                                                                                                                                                                                                            | 1519                                | 5255                     | 28.9% | 15754                               | 62415                    | 25.2% | 1.87 [1.06, 3.30]       |
| Anti-anginal agents                                                                                                                                                                                                                                                        | 1281                                | 2191                     | 58.5% | 38955                               | 42768                    | 91.1% | 0.61 [0.21, 1.74]       |
| Diuretics                                                                                                                                                                                                                                                                  | 1336                                | 2985                     | 44.8% | 6211                                | 45779                    | 13.6% | 1.98 [1.37, 2.86]       |
| Statins                                                                                                                                                                                                                                                                    | 3418                                | 6455                     | 52.9% | 56875                               | 64942                    | 87.6% | 0.25 [0.16, 0.38]       |
| <b>Invasive</b>                                                                                                                                                                                                                                                            |                                     |                          |       |                                     |                          |       |                         |
| PCI                                                                                                                                                                                                                                                                        | 2092                                | 9936                     | 21.1% | 67411                               | 86425                    | 78%   | 0.06 [0.04, 0.10]       |
| CABG                                                                                                                                                                                                                                                                       | 102                                 | 3451                     | 2.9%  | 3101                                | 48731                    | 6.4%  | 0.23 [0.12, 0.45]       |
| *Comparing T2MI with T1MI patients, with odds ratio adjusted according to study weighting using random effects meta-analysis                                                                                                                                               |                                     |                          |       |                                     |                          |       |                         |
| Abbreviations: ACEI= Angiotensin converting enzyme inhibitors, ARB= Angiotensin receptor blockers; CI=confidence interval; T2MI=type 2 myocardial infarction; T1MI=type 1 myocardial infarction; PCI=percutaneous coronary intervention; CABG=coronary artery bypass graft |                                     |                          |       |                                     |                          |       |                         |

Table 3. Outcomes in patients with T2MI versus T1MI.

| Outcomes                        | T2MI                      |                          |       | T1MI                      |                          |       | Odds ratio*<br>(95% CI) |
|---------------------------------|---------------------------|--------------------------|-------|---------------------------|--------------------------|-------|-------------------------|
|                                 | No. patients with outcome | Total number of patients | %     | No. patients with outcome | Total number of patients | %     |                         |
| CV in-hospital mortality        | 184                       | 2109                     | 8.7%  | 331                       | 6248                     | 5.3%  | 1.61 [1.17, 2.22]       |
| All-cause in-hospital mortality | 667                       | 5321                     | 12.5% | 1508                      | 25997                    | 5.8%  | 1.94 [1.35, 2.79]       |
| Short-term all-cause mortality  | 204                       | 887                      | 23.0% | 250                       | 1998                     | 12.5% | 1.34 [0.63, 2.85]       |
| 1-year all-cause mortality      | 632                       | 3340                     | 18.9% | 1299                      | 24203                    | 5.4%  | 3.11 [1.91, 5.08]       |
| 2-year all-cause mortality      | 246                       | 926                      | 26.6% | 428                       | 2587                     | 16.5% | 1.63 [1.11, 2.41]       |
| 3-year all-cause mortality      | 193                       | 525                      | 36.8% | 710                       | 4305                     | 16.5% | 2.00 [1.07, 3.76]       |
| Long-term all-cause mortality   | 1453                      | 2708                     | 53.7% | 1320                      | 4633                     | 28.5% | 3.24 [2.73, 3.84]       |

\*Comparing T1MI with T2MI patients, with odds ratio adjusted according to study weighting using random effects meta-analysis  
Abbreviations: CV= Cardiovascular, MACE= Major adverse cardiovascular events; T2MI=type 2 myocardial infarction; T1MI=type 1 myocardial infarction; CI=confidence interval

## Figures

Figure 1. Forest plot of one-year all-cause mortality of T2MI patients compared to T1MI patients.

Figure 2. Forest plot of long-term all-cause mortality of T2MI patients compared to T1MI patients.

Figure S1. PRISMA flow diagram.

Figure S2. Forest Plot. Presence of Ischaemic Heart Disease.

Figure S3. Forest Plot. Presence of Type 2 Diabetes Mellitus.

Figure S4. Forest Plot. Presence of Hypertension.

Figure S5. Forest Plot. Presence of Dyslipidaemia.

Figure S6. Forest Plot. Smoking Status.

Figure S7. Forest Plot. Obesity Status.

Figure S8. Forest Plot. Presence of Chronic Kidney Disease.



1  
2  
3 Figure S9. Forest Plot. Presence of Heart Failure.

4  
5 Figure S10. Forest Plot. Presence of Peripheral Vascular Disease.

6  
7 Figure S11. Forest Plot. Presence of Cerebrovascular Disease.

8  
9 Figure S12. Forest Plot. Presence of Illicit Drug Use.

10  
11 Figure S13. Forest Plot. Presence of Atrial Fibrillation.

12  
13 Figure S14. Forest Plot. Chest Pain as Presenting Feature.

14  
15 Figure S15. Forest Plot. Dyspnoea as Presenting Feature.

16  
17 Figure S16. Forest Plot. Arm / Shoulder Discomfort as Presenting Feature.

18  
19 Figure S17. Forest Plot. Nausea / Vomiting as Presenting Feature.

20  
21 Figure S18. Forest Plot. Non-specific Symptoms as Presenting Features.

22  
23 Figure S19. Forest Plot. Collapse / Syncope as Presenting Features.

24  
25 Figure S20. Forest Plot. ST Elevation on ECG.

26  
27 Figure S21. Forest Plot. ST Depression or T Wave Inversion on ECG.

28  
29 Figure S22. Forest Plot. Q Waves on ECG.

30  
31 Figure S23. Forest Plot. Non-specific ST Changes on ECG.

32  
33 Figure S24. Forest Plot. Left Bundle Branch Block on ECG.

34  
35 Figure S25. Forest Plot. Atrial Fibrillation on ECG.

36  
37 Figure S26. Forest Plot. Coronary Angiogram Performed.

38  
39 Figure S27. Forest Plot. Obstructive Coronary Artery Disease on Coronary Angiogram.

40  
41 Figure S28. Forest Plot. Multivessel Disease on Coronary Angiogram.

42  
43 Figure S29. Forest Plot. Echocardiogram Performed.

44  
45 Figure S30. Forest Plot. Regional Wall Motion Abnormalities on Echocardiogram.

46  
47 Figure S31. Forest Plot. Beta-Blockers Prescribed.

48  
49 Figure S32. Forest Plot. ACEi/ARB Prescribed.

50  
51 Figure S33. Forest Plot. Antiplatelets Prescribed.

52  
53 Figure S34. Forest Plot. Anticoagulants Prescribed.

54  
55 Figure S35. Forest Plot. Antianginal Drugs Prescribed.

56  
57 Figure S36. Forest Plot. Diuretics Prescribed.

58  
59 Figure S37. Forest Plot. Statins Prescribed.

60  
61 Figure S38. Forest Plot. Percutaneous Coronary Intervention Performed.

62  
63 Figure S39. Forest Plot. Coronary Artery Bypass Graft Performed.

1  
2  
3 Figure S40. Forest Plot. All cause In-hospital mortality. T2MI compared to T1MI.  
4

5 Figure S41. Forest Plot. Short-term all-cause mortality. T2MI compared to T1MI.  
6

7 Figure S42. Forest Plot. Two-year all-cause mortality. T2MI compared to T1MI.  
8

9 Figure S43. Forest Plot. Three-year all-cause mortality. T2MI compared to T1MI.  
10

11 Figure S44. Forest Plot. CVS In-hospital mortality. T2MI compared to T1MI.  
12

### 13 Contribution Statement

14 All authors (KW, MK, IS) contributed to the conception of the work. MK and KW performed the  
15 acquisition and analysis of the data. KW and IS were responsible for the interpretation of data. All  
16 authors (MK, KW, IS) were responsible for drafting manuscript and final approval of the version to be  
17 published. All authors (KW, MK, IS) agree to be accountable for all aspects of the work in ensuring  
18 that questions related to the accuracy or integrity of any part of the work are appropriately  
19 investigated and resolved.  
20  
21

### 22 Competing Interests

23 The authors declare there are no conflict of interest with respect the article.  
24  
25

### 26 Funding

27 This research received no specific grant from any funding agency in the public, commercial or not-  
28 for-profit sectors.  
29  
30

### 31 Data Sharing Statement

32 All data relevant to the study are included in the article or uploaded as supplementary information.  
33  
34

### 35 Ethic Approval Statement

36 No ethics approval was sought for this research project as no patient data was used.  
37  
38  
39  
40  
41  
42  
43  
44  
45  
46  
47  
48  
49  
50  
51  
52  
53  
54  
55  
56  
57  
58  
59  
60

## References

1. Thygesen K, Alpert JS, White HD, Jaffe AS, Apple FS, Galvani M, et al. Universal definition of myocardial infarction. *Circulation*. 2007;116(22):2634-53.
2. Thygesen K, Alpert JS, Jaffe AS, Simoons ML, Chaitman BR, White HD, et al. Third universal definition of myocardial infarction. *Circulation*. 2012;126(16):2020-35.
3. Thygesen K, Alpert JS, Jaffe AS, Chaitman BR, Bax JJ, Morrow DA, et al. Fourth Universal Definition of Myocardial Infarction (2018). *J Am Coll Cardiol*. 2018;72(18):2231-64.
4. Lippi G, Sanchis-Gomar F, Cervellin G. Chest pain, dyspnea and other symptoms in patients with type 1 and 2 myocardial infarction. A literature review. *International journal of cardiology*. 2016;215:20-2.
5. Lippi G, Sanchis-Gomar F, Cervellin G. Cardiac troponins and mortality in type 1 and 2 myocardial infarction. *Clinical chemistry and laboratory medicine*. 2017;55(2):181-8.
6. Gupta S, Vaidya SR, Arora S, Bahekar A, Devarapally SR. Type 2 versus type 1 myocardial infarction: a comparison of clinical characteristics and outcomes with a meta-analysis of observational studies. *Cardiovasc Diagn Ther*. 2017;7(4):348-58.
7. Reid C, Alturki A, Yan A, So D, Ko D, Tanguay JF, et al. Meta-analysis Comparing Outcomes of Type 2 Myocardial Infarction and Type 1 Myocardial Infarction With a Focus on Dual Antiplatelet Therapy. *CJC Open*. 2020;2(3):118-28.
8. Wang G, Zhao N, Zhong S, Li J. A systematic review on the triggers and clinical features of type 2 myocardial infarction. *Clin Cardiol*. 2019;42(10):1019-27.
9. Moher D, Liberati A, Tetzlaff J, Altman DG. Preferred reporting items for systematic reviews and meta-analyses: the PRISMA statement. *PLoS medicine*. 2009;6(7):e1000097.
10. Riley RD, Higgins JP, Deeks JJ. Interpretation of random effects meta-analyses. *BMJ*. 2011;342:d549.
11. Stang A. Critical evaluation of the Newcastle-Ottawa scale for the assessment of the quality of nonrandomized studies in meta-analyses. *Eur J Epidemiol*. 2010;25(9):603-5.
12. GA Wells BS, D O'Connell, J Peterson, V Welch, M Losos, P Tugwell. The Newcastle-Ottawa Scale (NOS) for assessing the quality of nonrandomised studies in meta-analyses: Ottawa Hospital Research Institute; 2011 [Available from: [http://www.ohri.ca/programs/clinical\\_epidemiology/oxford.asp](http://www.ohri.ca/programs/clinical_epidemiology/oxford.asp)].
13. Arora S, Strassle PD, Qamar A, Wheeler EN, Levine AL, Misenheimer JA, et al. Impact of Type 2 Myocardial Infarction (MI) on Hospital-Level MI Outcomes: Implications for Quality and Public Reporting. *Journal of the American Heart Association*. 2018;7(7).
14. Balanescu DV, Donisan T, Deswal A, Palaskas N, Song J, Lopez-Mattei J, et al. Acute myocardial infarction in a high-risk cancer population: Outcomes following conservative versus invasive management. *International journal of cardiology*. 2020;313:1-8.
15. Baron T, Hambraeus K, Sundstrom J, Erlinge D, Jernberg T, Lindahl B. Impact on Long-Term Mortality of Presence of Obstructive Coronary Artery Disease and Classification of Myocardial Infarction. *Am J Med*. 2016;129(4):398-406.
16. Bonaca MP, Wiviott SD, Braunwald E, Murphy SA, Ruff CT, Antman EM, et al. American College of Cardiology/American Heart Association/European Society of Cardiology/World Heart Federation universal definition of myocardial infarction classification system and the risk of cardiovascular death: observations from the TRITON-TIMI 38 trial (Trial to Assess Improvement in Therapeutic Outcomes by Optimizing Platelet Inhibition With Prasugrel-Thrombolysis in Myocardial Infarction 38). *Circulation*. 2012;125(4):577-83.
17. Cediel G, Gonzalez-Del-Hoyo M, Carrasquer A, Sanchez R, Boqué C, Bardají A. Outcomes with type 2 myocardial infarction compared with non-ischaemic myocardial injury. *Heart (British Cardiac Society)*. 2017;103(8):616-22.

18. Chapman AR, Adamson PD, Shah ASV, Anand A, Strachan FE, Ferry AV, et al. High-Sensitivity Cardiac Troponin and the Universal Definition of Myocardial Infarction. *Circulation*. 2020;141(3):161-71.
19. Chapman AR, Shah ASV, Lee KK, Anand A, Francis O, Adamson P, et al. Long-Term Outcomes in Patients With Type 2 Myocardial Infarction and Myocardial Injury. *Circulation*. 2018;137(12):1236-45.
20. Consuegra-Sánchez L, Martínez-Díaz JJ, de Guadiana-Romualdo LG, Wasniewski S, Esteban-Torrella P, Clavel-Ruipérez FG, et al. No additional value of conventional and high-sensitivity cardiac troponin over clinical scoring systems in the differential diagnosis of type 1 vs. type 2 myocardial infarction. *Clinical chemistry and laboratory medicine*. 2018;56(5):857-64.
21. El-Haddad H, Robinson E, Swett K, Wells GL. Prognostic implications of type 2 myocardial infarctions. 2012.
22. Etaher A, Gibbs OJ, Saad YM, Frost S, Nguyen TL, Ferguson I, et al. Type-II myocardial infarction and chronic myocardial injury rates, invasive management, and 4-year mortality among consecutive patients undergoing high-sensitivity troponin T testing in the emergency department. *European heart journal Quality of care & clinical outcomes*. 2020;6(1):41-8.
23. Furie N, Israel A, Gilad L, Neuman G, Assad F, Ben-Zvi I, et al. Type 2 myocardial infarction in general medical wards: Clinical features, treatment, and prognosis in comparison with type 1 myocardial infarction. *Medicine*. 2019;98(41):e17404.
24. Guimarães PO, Leonardi S, Huang Z, Wallentin L, de Werf FV, Aylward PE, et al. Clinical features and outcomes of patients with type 2 myocardial infarction: Insights from the Thrombin Receptor Antagonist for Clinical Event Reduction in Acute Coronary Syndrome (TRACER) trial. *Am Heart J*. 2018;196:28-35.
25. Hawatmeh A, Thawabi M, Aggarwal R, Abirami C, Vavilin I, Wasty N, et al. Implications of Misclassification of Type 2 Myocardial Infarction on Clinical Outcomes. *Cardiovascular revascularization medicine : including molecular interventions*. 2020;21(2):176-9.
26. Higuchi S, Suzuki M, Horiuchi Y, Tanaka H, Saji M, Yoshino H, et al. Higher non-cardiac mortality and lesser impact of early revascularization in patients with type 2 compared to type 1 acute myocardial infarction: results from the Tokyo CCU Network registry. *Heart Vessels*. 2019;34(7):1140-7.
27. Javed U, Aftab W, Ambrose JA, Wessel RJ, Mouanoutoua M, Huang G, et al. Frequency of elevated troponin I and diagnosis of acute myocardial infarction. *The American journal of cardiology*. 2009;104(1):9-13.
28. Kadesjö E, Roos A, Siddiqui A, Desta L, Lundbäck M, Holzmann MJ. Acute versus chronic myocardial injury and long-term outcomes. *Heart (British Cardiac Society)*. 2019;105(24):1905-12.
29. Lambrecht S, Sarkisian L, Saaby L, Poulsen TS, Gerke O, Hosbond S, et al. Different Causes of Death in Patients with Myocardial Infarction Type 1, Type 2, and Myocardial Injury. *Am J Med*. 2018;131(5):548-54.
30. Landes U, Bental T, Orvin K, Vaknin-Assa H, Rechavia E, Iakobishvili Z, et al. Type 2 myocardial infarction: A descriptive analysis and comparison with type 1 myocardial infarction. *Journal of cardiology*. 2016;67(1):51-6.
31. López-Cuenca A, Gómez-Molina M, Flores-Blanco PJ, Sánchez-Martínez M, García-Narbon A, De Las Heras-Gómez I, et al. Comparison between type-2 and type-1 myocardial infarction: clinical features, treatment strategies and outcomes. *J Geriatr Cardiol*. 2016;13(1):15-22.
32. Meigher S, Thode HC, Peacock WF, Bock JL, Gruberg L, Singer AJ. Causes of Elevated Cardiac Troponins in the Emergency Department and Their Associated Mortality. *Academic emergency medicine : official journal of the Society for Academic Emergency Medicine*. 2016;23(11):1267-73.
33. Nestelberger T, Boeddinghaus J, Badertscher P, Twerenbold R, Wildi K, Breitenbücher D, et al. Effect of Definition on Incidence and Prognosis of Type 2 Myocardial Infarction. *J Am Coll Cardiol*. 2017;70(13):1558-68.

- 1
- 2
- 3
- 4 34. Neumann JT, Sørensen NA, Rübtsamen N, Ojeda F, Renné T, Qaderi V, et al. Discrimination of
- 5 patients with type 2 myocardial infarction. *Eur Heart J*. 2017;38(47):3514-20.
- 6 35. Paiva L, Providencia R, Barra S, Dinis P, Faustino AC, Goncalves L. Universal definition of
- 7 myocardial infarction: clinical insights. *Cardiology*. 2015;131(1):13-21.
- 8 36. Pandey AK, Duong T, Swiatkiewicz I, Daniels LB. A Comparison of Biomarker Rise in Type 1
- 9 and Type 2 Myocardial Infarction. *The American journal of medicine*. 2020;133(10):1203-8.
- 10 37. Putot A, Derrida SB, Zeller M, Avondo A, Ray P, Manckoundia P, et al. Short-Term Prognosis
- 11 of Myocardial Injury, Type 1, and Type 2 Myocardial Infarction in the Emergency Unit. *Am J Med*.
- 12 2018;131(10):1209-19.
- 13 38. Putot A, Jeanmichel M, Chagué F, Avondo A, Ray P, Manckoundia P, et al. Type 1 or type 2
- 14 myocardial infarction in patients with a history of coronary artery disease: Data from the emergency
- 15 department. *Journal of Clinical Medicine*. 2019;8(12).
- 16 39. Putot A, Jeanmichel M, Chague F, Manckoundia P, Cottin Y, Zeller M. Type 2 Myocardial
- 17 Infarction: A Geriatric Population-based Model of Pathogenesis. *Aging and disease*. 2020;11(1):108-
- 18 17.
- 19 40. Radovanovic D, Pilgrim T, Seifert B, Urban P, Pedrazzini G, Erne P. Type 2 myocardial
- 20 infarction: incidence, presentation, treatment and outcome in routine clinical practice. *Journal of*
- 21 *cardiovascular medicine (Hagerstown, Md)*. 2017;18(5):341-7.
- 22 41. Raphael CE, Roger VL, Sandoval Y, Singh M, Bell M, Lerman A, et al. Incidence, Trends, and
- 23 Outcomes of Type 2 Myocardial Infarction in a Community Cohort. *Circulation*. 2020;141(6):454-63.
- 24 42. Reed GW, Horr S, Young L, Clevenger J, Malik U, Ellis SG, et al. Associations Between Cardiac
- 25 Troponin, Mechanism of Myocardial Injury, and Long-Term Mortality After Noncardiac Vascular
- 26 Surgery. *Journal of the American Heart Association*. 2017;6(6).
- 27 43. Saaby L, Poulsen TS, Diederichsen AC, Hosbond S, Larsen TB, Schmidt H, et al. Mortality rate
- 28 in type 2 myocardial infarction: observations from an unselected hospital cohort. *Am J Med*.
- 29 2014;127(4):295-302.
- 30 44. Saaby L, Poulsen TS, Hosbond S, Larsen TB, Pyndt Diederichsen AC, Hallas J, et al.
- 31 Classification of myocardial infarction: frequency and features of type 2 myocardial infarction. *Am J*
- 32 *Med*. 2013;126(9):789-97.
- 33 45. Sandoval Y, Smith SW, Sexter A, Thordsen SE, Bruen CA, Carlson MD, et al. Type 1 and 2
- 34 Myocardial Infarction and Myocardial Injury: Clinical Transition to High-Sensitivity Cardiac Troponin I.
- 35 *Am J Med*. 2017;130(12):1431-9.e4.
- 36 46. Sandoval Y, Thordsen SE, Smith SW, Schulz KM, Murakami MM, Pearce LA, et al. Cardiac
- 37 troponin changes to distinguish type 1 and type 2 myocardial infarction and 180-day mortality risk.
- 38 *European heart journal Acute cardiovascular care*. 2014;3(4):317-25.
- 39 47. Sato R, Sakamoto K, Kaikita K, Tsujita K, Nakao K, Ozaki Y, et al. Long-Term Prognosis of
- 40 Patients with Myocardial Infarction Type 1 and Type 2 with and without Involvement of Coronary
- 41 Vasospasm. *Journal of clinical medicine*. 2020;9(6).
- 42 48. Shah AS, McAllister DA, Mills R, Lee KK, Churchhouse AM, Fleming KM, et al. Sensitive
- 43 troponin assay and the classification of myocardial infarction. *Am J Med*. 2015;128(5):493-501.e3.
- 44 49. Singh A, Gupta A, DeFilippis EM, Qamar A, Biery DW, Almarzooq Z, et al. Cardiovascular
- 45 Mortality After Type 1 and Type 2 Myocardial Infarction in Young Adults. *Journal of the American*
- 46 *College of Cardiology*. 2020;75(9):1003-13.
- 47 50. Smilowitz NR, Subramanyam P, Gianos E, Reynolds HR, Shah B, Sedlis SP. Treatment and
- 48 outcomes of type 2 myocardial infarction and myocardial injury compared with type 1 myocardial
- 49 infarction. *Coronary artery disease*. 2018;29(1):46-52.
- 50 51. Stein GY, Herscovici G, Korenfeld R, Matetzky S, Gottlieb S, Alon D, et al. Type-II myocardial
- 51 infarction--patient characteristics, management and outcomes. *PLoS One*. 2014;9(1):e84285.
- 52 52. Truong HH, Victor MV, Imad MA, Kobalava ZD, Parvathy UT, Al-Zakwani I. Mortality and
- 53 morbidity associated with type 2 myocardial infarction: A single-center study. *Annals of Clinical*
- 54 *Cardiology*. 2020;2(2):70-9.
- 55
- 56
- 57
- 58
- 59
- 60

- 1  
2  
3 53. Baron T, Hambraeus K, Sundstrom J, Erlinge D, Jernberg T, Lindahl B. Type 2 myocardial  
4 infarction in clinical practice. *Heart (British Cardiac Society)*. 2015;101(2):101-6.  
5 54. Alpert JS, Thygesen KA, White HD, Jaffe AS. Diagnostic and therapeutic implications of type 2  
6 myocardial infarction: review and commentary. *Am J Med*. 2014;127(2):105-8.  
7 55. Gaggin HK, Liu Y, Lyass A, van Kimmenade RR, Motiwala SR, Kelly NP, et al. Incident Type 2  
8 Myocardial Infarction in a Cohort of Patients Undergoing Coronary or Peripheral Arterial  
9 Angiography. *Circulation*. 2017;135(2):116-27.  
10  
11  
12  
13  
14  
15  
16  
17  
18  
19  
20  
21  
22  
23  
24  
25  
26  
27  
28  
29  
30  
31  
32  
33  
34  
35  
36  
37  
38  
39  
40  
41  
42  
43  
44  
45  
46  
47  
48  
49  
50  
51  
52  
53  
54  
55  
56  
57  
58  
59  
60

For peer review only

1  
2  
3  
4  
5  
6  
7  
8  
9  
10  
11  
12  
13  
14  
15  
16  
17  
18  
19  
20  
21  
22  
23  
24  
25  
26  
27  
28  
29  
30  
31  
32  
33  
34  
35  
36  
37  
38  
39  
40  
41  
42  
43  
44  
45  
46

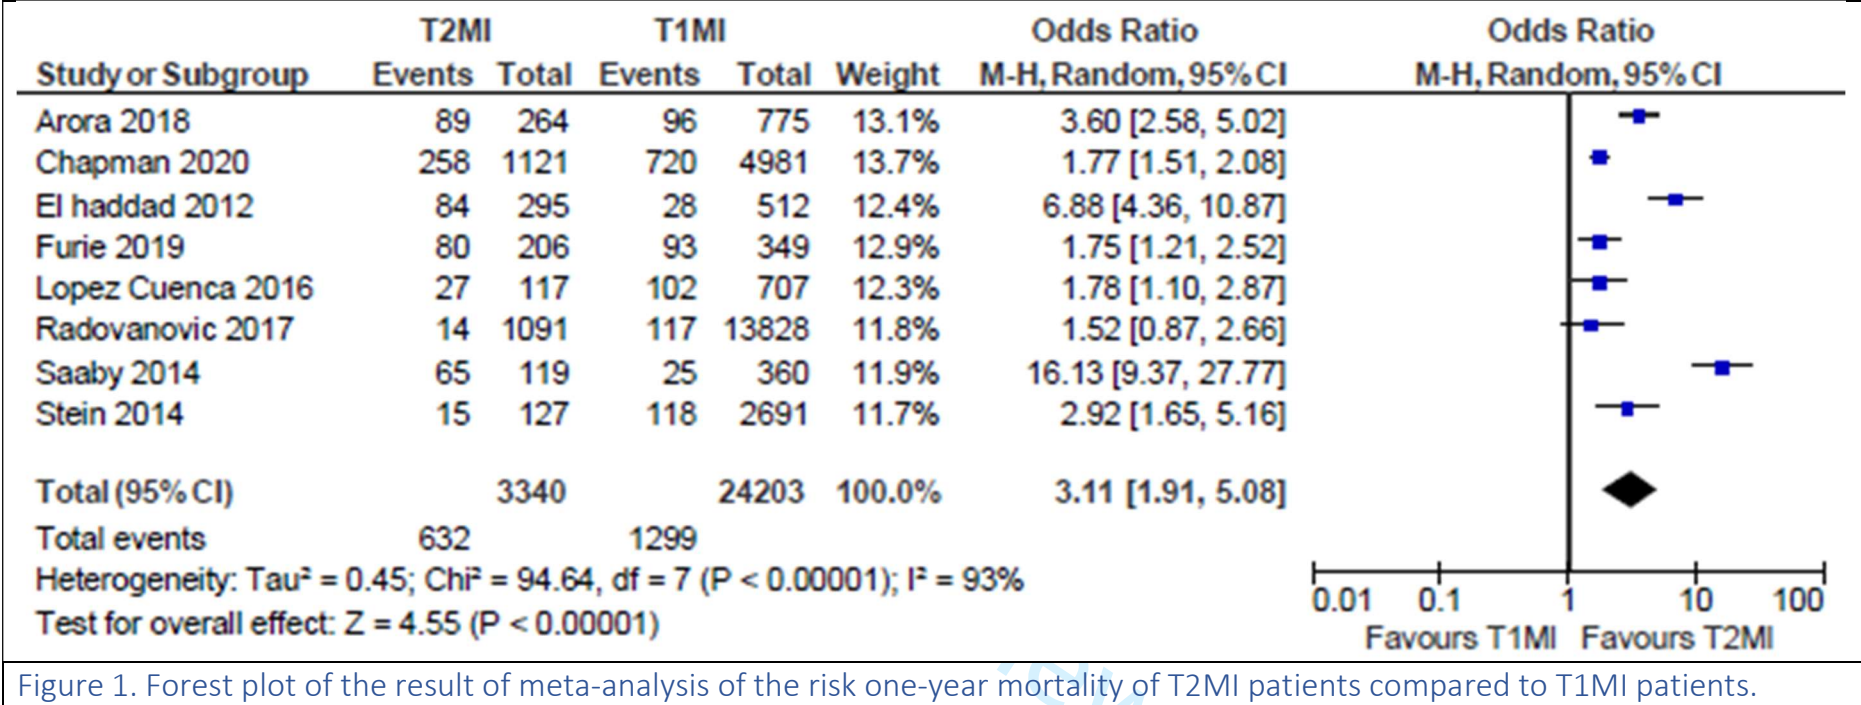

Figure 1. Forest plot of the result of meta-analysis of the risk one-year mortality of T2MI patients compared to T1MI patients.

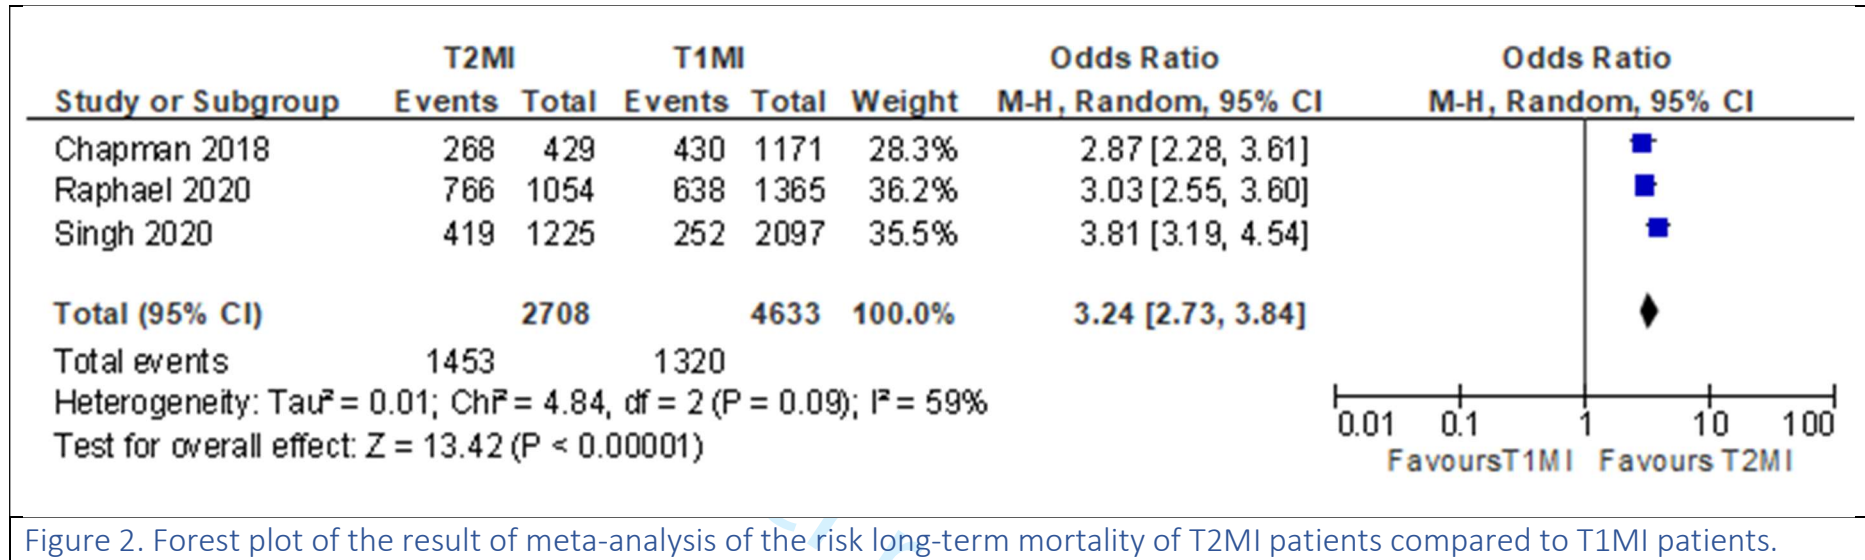

Figure 2. Forest plot of the result of meta-analysis of the risk long-term mortality of T2MI patients compared to T1MI patients.

Review only



Table S1. Evolving definitions of Type 2 Myocardial Infarction.

| Year | Universal Definition of Type 2 Myocardial Infarction                                                                                                                                                                                                                                                                                                                                                                                                                                                                                                                                             |
|------|--------------------------------------------------------------------------------------------------------------------------------------------------------------------------------------------------------------------------------------------------------------------------------------------------------------------------------------------------------------------------------------------------------------------------------------------------------------------------------------------------------------------------------------------------------------------------------------------------|
| 2007 | Myocardial infarction secondary to ischaemia due to either increased oxygen demand or decreased supply, e.g. coronary artery spasm, coronary embolism, anaemia, arrhythmias, hypotension or hypertension                                                                                                                                                                                                                                                                                                                                                                                         |
| 2012 | Instances of myocardial injury with necrosis where a condition other than coronary artery disease contributes to an imbalance between myocardial oxygen supply and/or demand e.g. coronary artery spasm, coronary embolism, anaemia, arrhythmias, hypotension or hypertension                                                                                                                                                                                                                                                                                                                    |
| 2018 | Detection of a rise and/or fall of cTn values with at least one value above the 99th percentile URL, and evidence of an imbalance between myocardial oxygen supply and demand unrelated to coronary thrombosis, requiring at least one of the following: <ul style="list-style-type: none"> <li>- Symptoms of acute myocardial ischaemia</li> <li>- New ischaemic ECG changes</li> <li>- Development of pathological Q waves</li> <li>- Imaging evidence of new loss of viable myocardium or new regional wall motion abnormality in a pattern consistent with an ischaemic aetiology</li> </ul> |

Table S2. Search strategy.

MEDLINE: (type 2 adj3 myocard\*) OR (type-2 adj3 myocard\*) OR (type II adj3 myocard\*) OR (type-II adj3 myocard\*) OR (type 2 adj3 MI) OR (type-2 adj3 MI) OR T2MI OR (supply demand adj3 myocard\*)

EMBASE: ('type 2' NEXT/3 myocard\*) OR ('type-2' NEXT/3 myocard\*) OR ('type ii' NEXT/3 myocard\*) OR ('type-ii' NEXT/3 myocard\*) OR ('type 2' NEXT/3 mi) OR ('type-2' NEXT/3 mi) OR ('t2mi') OR ('supply demand' NEXT/3 myocard\*)

Table S3a. Study characteristics

| Author, Year                | Patients |      | Design        | Definition of MI | Geographic location | Screening                                    | Troponin Assay  |
|-----------------------------|----------|------|---------------|------------------|---------------------|----------------------------------------------|-----------------|
|                             | T1MI     | T2MI |               |                  |                     |                                              |                 |
| Arora, 2018 (1)             | 775      | 264  | Retrospective | 2012             | USA                 | NSTEMI patients                              | cTnI            |
| Balanescu, 2020 (2)         | 152      | 49   | Retrospective | 2018             | USA                 | AMI patients                                 | N/A             |
| Baron, 2016 (3)             | 40501    | 1313 | Prospective   | 2007             | Sweden              | AMI patients                                 | hs-cTnT         |
| Bonaca, 2012 (4)            | 359      | 42   | Prospective   | 2007             | Multinational       | TRITON TIMI 38 trial                         | N/A             |
| Cediel, 2017 (5)            | 376      | 194  | Retrospective | 2012             | Spain               | ED patients with at least 1 troponin         | cTnI            |
| Chapman, 2018 (6)           | 1171     | 429  | Prospective   | 2012             | UK                  | ED with elevated troponin                    | cTnI            |
| Chapman, 2020 (7)           | 4981     | 1121 | Prospective   | 2018             | UK                  | Suspected ACS                                | cTnI            |
| Consuegra-Sanchaz, 2018 (8) | 125      | 75   | Retrospective | 2012             | Spain               | ED patients with at least 1 troponin         | cTnI<br>hs-cTnT |
| El-Haddad, 2012 (9)         | 512      | 295  | Retrospective | 2012             | USA                 | Patients with elevated troponin              | N/A             |
| Etaher, 2020 (10)           | 97       | 121  | Prospective   | 2018             | Australia           | Patients with elevated troponin              | N/A             |
| Furie, 2019 (11)            | 349      | 206  | Retrospective | 2012             | Israel              | NSTEMI on general ward                       | Unknown         |
| Guimaraes, 2018 (12)        | 847      | 76   | Retrospective | 2012             | Multinational       | ACS during TRACER trial                      | N/A             |
| Hawatmeh, 2020 (13)         | 664      | 281  | Retrospective | 2012             | USA                 | NSTEMI patients                              | cTnI            |
| Higuchi, 2019 (14)          | 12023    | 491  | Retrospective | 2012             | Tokyo               | Admitted to CCU                              | N/A             |
| Javed, 2009 (15)            | 143      | 64   | Retrospective | 2007             | USA                 | Patients with elevated troponin              | cTnI            |
| Kadesjo, 2019 (16)          | 1111     | 251  | Retrospective | 2018             | Sweden              | MI, Registry                                 | N/A             |
| Lambrecht, 2018 (17)        | 360      | 119  | Prospective   | 2007             | Denmark             | Hospitalised patients with troponin measured | cTnI            |
| Landes, 2016 (18)           | 107      | 107  | Retrospective | 2012             | Israel              | Diagnosed with T2MI and T1MI                 | cTnT            |
| Lopez-Cuenca, 2016 (19)     | 707      | 117  | Retrospective | 2012             | Spain               | Diagnosed with T2MI and T1MI                 | hs-cTnT         |
| Meigher, 2016 (20)          | 340      | 452  | Retrospective | 2012             | Germany             | ED patients with elevated troponin           | cTnI            |
| Nestelberger, 2017 (21)     | 684      | 128  | Prospective   | 2012             | Multinational       | ED patients with MI                          | N/A             |
| Neumann, 2017 (22)          | 188      | 99   | Prospective   | 2012             | Germany             | ED patients with suspected MI                | hs-cTnI         |

|    |                                                                                                                                                                                                                                                                                             |       |      |               |      |             |                                              |      |
|----|---------------------------------------------------------------------------------------------------------------------------------------------------------------------------------------------------------------------------------------------------------------------------------------------|-------|------|---------------|------|-------------|----------------------------------------------|------|
| 1  | Paiva, 2015 (23)                                                                                                                                                                                                                                                                            | 764   | 236  | Retrospective | 2012 | Portugal    | Admitted to CCU with MI                      | cTnI |
| 2  | Pandey, 2020 (24)                                                                                                                                                                                                                                                                           | 97    | 103  | Prospective   | 2018 | USA         | MI                                           | N/A  |
| 3  | Putot, 2018 (25)                                                                                                                                                                                                                                                                            | 2036  | 847  | Prospective   | 2012 | France      | ED or cardiology ward with elevated troponin | cTnI |
| 4  | Putot, 2019 (26)                                                                                                                                                                                                                                                                            | 365   | 254  | Retrospective | 2018 | France      | Hospitalised patients with CAD               | cTnI |
| 5  | Putot, 2020 (27)                                                                                                                                                                                                                                                                            | 3710  | 862  | Retrospective | 2012 | France      | Hospitalised patients with MI                | cTnI |
| 6  | Radovanovic, 2017 (28)                                                                                                                                                                                                                                                                      | 13828 | 1091 | Retrospective | 2012 | Switzerland | Diagnosed AMI                                | N/A  |
| 7  | Raphael, 2020 (29)                                                                                                                                                                                                                                                                          | 1365  | 1054 | Retrospective | 2018 | USA         | Raised troponin                              | cTnT |
| 8  | Reed, 2017 (30)                                                                                                                                                                                                                                                                             | 88    | 162  | Retrospective | 2012 | USA         | Underwent vascular surgery procedure         | cTnT |
| 9  | Saaby 2013 (31)                                                                                                                                                                                                                                                                             | 397   | 144  | Prospective   | 2007 | Denmark     | Troponin measured                            | cTnI |
| 10 | Saaby, 2014 (32)                                                                                                                                                                                                                                                                            | 360   | 119  | Prospective   | 2007 | Denmark     | Elevated troponin                            | cTnI |
| 11 | Sandoval, 2014 (33)                                                                                                                                                                                                                                                                         | 66    | 190  | Retrospective | 2012 | USA         | ED patients with troponin measured           | cTnI |
| 12 | Sandoval, 2017 (34)                                                                                                                                                                                                                                                                         | 77    | 140  | Prospective   | 2012 | USA         | ED patients with troponin measured           | cTnI |
| 13 | Sato, 2020 (35)                                                                                                                                                                                                                                                                             | 2834  | 155  | Prospective   | 2012 | Japan       | Hospitalised patient with MI                 | N/A  |
| 14 | Shah, 2015 (36)                                                                                                                                                                                                                                                                             | 1171  | 429  | Prospective   | 2012 | UK          | Admitted with elevated troponin              | cTnI |
| 15 | Singh, 2020 (37)                                                                                                                                                                                                                                                                            | 2097  | 1225 | Retrospective | 2018 | USA         | Age <50, MI or raised troponin               | N/A  |
| 16 | Smilowitz, 2018 (38)                                                                                                                                                                                                                                                                        | 137   | 146  | Prospective   | 2012 | USA         | Admitted with raised troponin                | cTnI |
| 17 | Stein, 2014 (39)                                                                                                                                                                                                                                                                            | 2691  | 127  | Prospective   | 2007 | Israel      | Admitted to cardiology                       | N/A  |
| 18 | Truong, 2020 (40)                                                                                                                                                                                                                                                                           | 275   | 175  | Retrospective | 2012 | Russia      | MI, undergoing angiogram                     | N/A  |
| 19 | <i>cTnI = cardiac troponin I; cTnT = cardiac troponin T; hs- = high sensitivity; AMI = acute myocardial infarction; MI = myocardial infarction; ACS = acute coronary syndrome; NSTEMI = non-ST elevation myocardial infarction; CCU = coronary care unit; CAD = coronary artery disease</i> |       |      |               |      |             |                                              |      |

Table S3b. Study characteristics

| Author, Year                | Patients |      | Variables               |          |                |                 |            |           |
|-----------------------------|----------|------|-------------------------|----------|----------------|-----------------|------------|-----------|
|                             | T1MI     | T2MI | Pre-existing conditions | Symptoms | Investigations | Troponin Values | Management | Prognosis |
| Arora, 2018 (1)             | 775      | 264  | X                       |          | X              | X               | X          | X         |
| Balanescu, 2020 (2)         | 152      | 49   |                         | X        | X              |                 | X          |           |
| Baron, 2016 (3)             | 40501    | 1313 | X                       | X        | X              | X               | X          |           |
| Bonaca, 2012 (4)            | 359      | 42   |                         |          |                |                 |            |           |
| Cediel, 2017 (5)            | 376      | 194  | X                       | X        | X              | X               |            | X         |
| Chapman, 2018 (6)           | 1171     | 429  | X                       |          | X              | X               | X          | X         |
| Chapman, 2020 (7)           | 4981     | 1121 | X                       | X        | X              | X               |            | X         |
| Consuegra-Sanchaz, 2018 (8) | 125      | 75   | X                       | X        | X              | X               |            |           |
| El-Haddad, 2012 (9)         | 512      | 295  |                         |          |                |                 |            | X         |
| Etaher, 2020 (10)           | 97       | 121  | X                       |          | X              |                 | X          |           |
| Furie, 2019 (11)            | 349      | 206  | X                       | X        | X              | X               | X          | X         |
| Guimaraes, 2018 (12)        | 847      | 76   | X                       |          | X              |                 | X          | X         |
| Hawatmeh, 2020 (13)         | 664      | 281  | X                       |          | X              | X               | X          |           |
| Higuchi, 2019 (14)          | 12023    | 491  | X                       |          | X              |                 | X          | X         |
| Javed, 2009 (15)            | 143      | 64   | X                       |          | X              | X               |            | X         |
| Kadesjo, 2019 (16)          | 1111     | 251  | X                       |          |                |                 | X          | X         |
| Lambrecht, 2018 (17)        | 360      | 119  | X                       |          | X              | X               |            | X         |
| Landes, 2016 (18)           | 107      | 107  | X                       | X        | X              | X               |            |           |
| Lopez-Cuenca, 2016 (19)     | 707      | 117  | X                       | X        | X              | X               | X          | X         |
| Meigher, 2016 (20)          | 340      | 452  | X                       | X        | X              | X               |            | X         |
| Nestelberger, 2017 (21)     | 684      | 128  | X                       |          | X              |                 | X          | X         |
| Neumann, 2017 (22)          | 188      | 99   | X                       |          | X              | X               |            | X         |
| Paiva, 2015 (23)            | 764      | 236  | X                       |          | X              | X               |            | X         |
| Pandey, 2020 (24)           | 97       | 103  | X                       |          |                |                 |            |           |
| Putot, 2018 (25)            | 2036     | 847  | X                       |          | X              | X               |            | X         |
| Putot, 2019 (26)            | 365      | 254  | X                       |          | X              | X               |            | X         |
| Putot, 2020 (27)            | 3710     | 862  | X                       |          | X              | X               |            | X         |
| Radovanovic, 2017 (28)      | 13828    | 1091 | X                       |          | X              |                 | X          | X         |
| Raphael, 2020 (29)          | 1365     | 1054 | X                       |          | X              | X               | X          | X         |

|                      |      |      |   |   |   |   |   |   |
|----------------------|------|------|---|---|---|---|---|---|
| Reed, 2017 (30)      | 88   | 162  |   |   | X | X | X |   |
| Saaby 2013 (31)      | 397  | 144  | X |   | X | X |   |   |
| Saaby, 2014 (32)     | 360  | 119  | X |   | X | X | X | X |
| Sandoval, 2014 (33)  | 66   | 190  | X | X | X | X |   | X |
| Sandoval, 2017 (34)  | 77   | 140  | X | X | X | X | X | X |
| Sato, 2020 (35)      | 2834 | 155  | X |   | X |   | X | X |
| Shah, 2015 (36)      | 1171 | 429  | X | X | X | X | X | X |
| Singh, 2020 (37)     | 2097 | 1225 | X |   | X |   | X | X |
| Smilowitz, 2018 (38) | 137  | 146  | X | X | X | X | X | X |
| Stein, 2014 (39)     | 2691 | 127  | X | X | X |   | X | X |
| Truong, 2020 (40)    | 275  | 175  | X | X | X |   | X | X |
|                      |      |      |   |   |   |   |   |   |

1  
2  
3  
4  
5  
6  
7  
8  
9  
10  
11  
12  
13  
14  
15  
16  
17  
18  
19  
20  
21  
22  
23  
24  
25  
26  
27  
28  
29  
30  
31  
32  
33  
34  
35  
36  
37  
38  
39  
40  
41  
42  
43  
44  
45  
46

Table S4. Risk of bias assessment

| Author, Year                | Outcome                          |                          |            |                  |                       | Summary          |
|-----------------------------|----------------------------------|--------------------------|------------|------------------|-----------------------|------------------|
|                             | Representative of Exposed Cohort | Selection of Non-exposed | Assessment | Follow-up Length | Adequacy of Follow-Up |                  |
| Arora, 2018 (1)             | x                                | x                        | x          | x                | x                     | 8 (good quality) |
| Balanescu, 2020 (2)         | 0                                | x                        | x          | 0                | x                     | 6 (fair quality) |
| Baron, 2016 (3)             | x                                | x                        | x          | x                | x                     | 8 (good quality) |
| Bonaca, 2012 (4)            | x                                | x                        | x          | x                | x                     | 8 (good quality) |
| Cediel, 2017 (5)            | x                                | x                        | x          | x                | x                     | 8 (good quality) |
| Chapman, 2018 (6)           | x                                | x                        | x          | x                | x                     | 8 (good quality) |
| Chapman, 2020 (7)           | x                                | x                        | x          | x                | x                     | 8 (good quality) |
| Consuegra-Sanchaz, 2018 (8) | 0                                | 0                        | x          | 0                | 0                     | 3 (poor quality) |
| El-Haddad, 2012 (9)         | x                                | x                        | 0          | 0                | 0                     | 5 (fair quality) |
| Etaher, 2020 (10)           | x                                | x                        | x          | x                | x                     | 8 (good quality) |
| Furie, 2019 (11)            | x                                | x                        | x          | x                | x                     | 8 (good quality) |
| Guimaraes, 2018 (12)        | 0                                | 0                        | x          | 0                | x                     | 4 (fair quality) |
| Hawatmeh, 2020 (13)         | 0                                | 0                        | x          | x                | 0                     | 4 (fair quality) |
| Higuchi, 2019 (14)          | 0                                | 0                        | x          | x                | x                     | 5 (fair quality) |
| Javed, 2009 (15)            | x                                | x                        | x          | x                | x                     | 8 (good quality) |
| Kadesjo, 2019 (16)          | x                                | x                        | x          | x                | x                     | 8 (good quality) |
| Lambrecht, 2018 (17)        | x                                | x                        | x          | x                | x                     | 8 (good quality) |
| Landes, 2016 (18)           | x                                | x                        | x          | x                | x                     | 8 (good quality) |
| Lopez-Cuenca, 2016 (19)     | x                                | x                        | x          | x                | x                     | 8 (good quality) |
| Meigher, 2016 (20)          | x                                | x                        | x          | x                | x                     | 8 (good quality) |
| Nestelberger, 2017 (21)     | x                                | x                        | x          | x                | x                     | 8 (good quality) |
| Neumann, 2017 (22)          | x                                | x                        | x          | x                | x                     | 8 (good quality) |

|                        |   |   |   |   |   |                  |
|------------------------|---|---|---|---|---|------------------|
| Paiva, 2015 (23)       | x | x | x | x | x | 8 (good quality) |
| Pandey, 2020 (24)      | 0 | 0 | 0 | 0 | 0 | 2 (poor quality) |
| Putot, 2018 (25)       | x | x | x | x | x | 8 (good quality) |
| Putot, 2019 (26)       | x | x | 0 | x | x | 7 (good quality) |
| Putot, 2020 (27)       | x | x | x | x | x | 8 (good quality) |
| Radovanovic, 2017 (28) | x | x | x | x | x | 8 (good quality) |
| Raphael, 2020 (29)     | x | x | x | x | x | 8 (good quality) |
| Reed, 2017 (30)        | x | x | x | x | x | 8 (good quality) |
| Saaby 2013 (31)        | x | x | x | x | x | 8 (good quality) |
| Saaby, 2014 (32)       | x | x | x | x | x | 8 (good quality) |
| Sandoval, 2014 (33)    | x | x | x | x | x | 8 (good quality) |
| Sandoval, 2017 (34)    | x | x | x | x | x | 8 (good quality) |
| Sato, 2020 (35)        | 0 | 0 | 0 | x | x | 2 (poor quality) |
| Shah, 2015 (36)        | x | x | x | x | x | 8 (good quality) |
| Singh, 2020 (37)       | 0 | 0 | x | x | x | 6 (fair quality) |
| Smilowitz, 2018 (38)   | x | x | x | x | x | 7 (good quality) |
| Stein, 2014 (39)       | x | x | x | x | x | 7 (good quality) |
| Truong, 2020 (40)      | x | x | x | x | x | 8 (good quality) |

1  
2  
3  
4  
5  
6  
7  
8  
9  
10  
11  
12  
13  
14  
15  
16  
17  
18  
19  
20  
21  
22  
23  
24  
25  
26  
27  
28  
29  
30  
31  
32  
33  
34  
35  
36  
37  
38  
39  
40  
41  
42  
43  
44  
45  
46

Table S5. Precipitating conditions for T2MI.

| Precipitating Factor                  | Events | Patients | %     |
|---------------------------------------|--------|----------|-------|
| Sepsis                                | 1116   | 3110     | 35.9% |
| Heart failure                         | 698    | 1943     | 35.9% |
| Arrhythmia                            | 1716   | 5465     | 31.4% |
| Anaemia                               | 1506   | 4878     | 30.9% |
| Valvular abnormality                  | 351    | 1301     | 27.0% |
| Respiratory failure                   | 743    | 3021     | 24.6% |
| Chronic obstructive pulmonary disease | 59     | 258      | 22.9% |
| Stroke                                | 44     | 328      | 13.4% |
| Hypertension                          | 291    | 2217     | 13.1% |
| Non-cardiac surgery                   | 103    | 841      | 12.2% |
| Shock/hypotension                     | 291    | 3006     | 9.7%  |
| Renal failure                         | 51     | 553      | 9.2%  |
| Pulmonary oedema                      | 33     | 380      | 8.7%  |
| Bradycardia                           | 35     | 484      | 7.2%  |
| Infection                             | 115    | 2009     | 5.7%  |
| Coronary spasm                        | 36     | 1048     | 3.4%  |
| Bleeding                              | 53     | 1834     | 2.9%  |
| Coronary endothelial dysfunction      | 1      | 592      | 0.2%  |



1  
2  
3  
4  
5  
6  
7  
8  
9  
10  
11  
12  
13  
14  
15  
16  
17  
18  
19  
20  
21  
22  
23  
24  
25  
26  
27  
28  
29  
30  
31  
32  
33  
34  
35  
36  
37  
38  
39  
40  
41  
42  
43  
44  
45  
46  
47  
48  
49  
50  
51  
52  
53  
54  
55  
56  
57  
58  
59  
60

Table S6. Clinical features on presentation in patients with T2MI versus T1MI patients.

| Presenting Symptom         | T2MI                                 |                          |       | T1MI                                 |                          |       | Odds ratio *<br>[95% CI] |
|----------------------------|--------------------------------------|--------------------------|-------|--------------------------------------|--------------------------|-------|--------------------------|
|                            | No. patients with presenting symptom | Total number of patients | %     | No. patients with presenting symptom | Total number of patients | %     |                          |
| Chest pain                 | 3474                                 | 5932                     | 58.6% | 58273                                | 65883                    | 88.4% | 0.19 [0.13, 0.26]        |
| Dyspnoea                   | 1412                                 | 5210                     | 27.1% | 6930                                 | 65129                    | 10.6% | 2.64 [1.86, 3.74]        |
| Arm or shoulder discomfort | 28                                   | 330                      | 8.5%  | 50                                   | 143                      | 35.0% | 0.18 [0.11, 0.30]        |
| Jaw or neck discomfort     | 6                                    | 140                      | 4.3%  | 12                                   | 77                       | 15.6% | 0.24 [0.09, 0.68]        |
| Epigastric discomfort      | 8                                    | 140                      | 5.7%  | 8                                    | 77                       | 10.4% | 0.52 [0.19, 1.45]        |
| Nausea or vomiting         | 46                                   | 330                      | 13.9% | 39                                   | 143                      | 27.3% | 0.46 [0.28, 0.74]        |
| Fatigue                    | 5                                    | 140                      | 3.6%  | 5                                    | 77                       | 6.5%  | 0.53 [0.15, 1.90]        |
| Diaphoresis                | 16                                   | 140                      | 11.4% | 16                                   | 77                       | 20.8% | 0.49 [0.23, 1.05]        |
| Other nonspecific symptoms | 988                                  | 1529                     | 64.6% | 2662                                 | 41396                    | 6.4%  | 4.9 [0.48, 50.33]        |
| Collapse / syncope         | 99                                   | 2125                     | 4.7%  | 157                                  | 7152                     | 2.2%  | 2.10 [1.05, 4.18]        |

\*Comparing T2MI with T1MI patients, with odds ratio adjusted according to study weighting using random effects meta-analysis

Abbreviations: URL- upper reference limit; STEMI- ST elevation myocardial infarction; NSTEMI- Non- ST elevation myocardial infarction; MI- Myocardial infarction; cTn- cardiac troponin; T1MI- Type 1 myocardial infarction; T2MI- Type 2 myocardial infarction; ECG- electrocardiogram; CAD- coronary artery disease; PCI- percutaneous coronary intervention; CABG- coronary artery bypass graft; IHD- ischaemic heart disease; MACE- Major adverse cardiovascular events; CI- confidence interval

Table S7. Cardiac investigations in patients with T2 MI versus T1MI.

| Variable                                                                                                                                                                                                                                                                                      | T2MI                                            |                    |       | T1MI                                            |                      |       | Odds ratio*<br>(95% CI) |
|-----------------------------------------------------------------------------------------------------------------------------------------------------------------------------------------------------------------------------------------------------------------------------------------------|-------------------------------------------------|--------------------|-------|-------------------------------------------------|----------------------|-------|-------------------------|
|                                                                                                                                                                                                                                                                                               | No. patients with nominated diagnostic findings | Total no. patients | %     | No. patients with nominated diagnostic findings | Total no of patients | %     |                         |
| <b>ECG</b>                                                                                                                                                                                                                                                                                    |                                                 |                    |       |                                                 |                      |       |                         |
| ST elevation                                                                                                                                                                                                                                                                                  | 1129                                            | 8014               | 14.1% | 37182                                           | 84096                | 44.2% | 0.22 [0.17, 0.28]       |
| ST depression or T wave Inversion                                                                                                                                                                                                                                                             | 1728                                            | 4911               | 35.2% | 10968                                           | 51042                | 21.5% | 1.36 [0.85, 2.17]       |
| Pathological Q Waves                                                                                                                                                                                                                                                                          | 30                                              | 447                | 6.7%  | 177                                             | 850                  | 20.8% | 0.38 [0.20, 0.71]       |
| Non-specific ST-T wave changes                                                                                                                                                                                                                                                                | 146                                             | 592                | 24.7% | 45                                              | 417                  | 10.8% | 2.62 [1.81, 3.79]       |
| Left bundle branch block                                                                                                                                                                                                                                                                      | 175                                             | 1927               | 9.1%  | 1943                                            | 42543                | 4.6%  | 1.62 [1.21, 2.17]       |
| Atrial fibrillation/flutter                                                                                                                                                                                                                                                                   | 54                                              | 257                | 21%   | 52                                              | 784                  | 6.6%  | 4.99 [3.14, 7.93]       |
| <b>Echocardiograph</b>                                                                                                                                                                                                                                                                        |                                                 |                    |       |                                                 |                      |       |                         |
| Echocardiogram performed                                                                                                                                                                                                                                                                      | 648                                             | 1353               | 47.9% | 1571                                            | 2830                 | 55.5% | 0.44 [0.20, 0.96]       |
| Presence of RWMA                                                                                                                                                                                                                                                                              | 97                                              | 286                | 33.9% | 101                                             | 214                  | 47.2% | 0.48 [0.06, 3.78]       |
| <b>Angiogram</b>                                                                                                                                                                                                                                                                              |                                                 |                    |       |                                                 |                      |       |                         |
| Angiogram performed                                                                                                                                                                                                                                                                           | 3182                                            | 9318               | 34.1% | 42724                                           | 49944                | 85.5% | 0.09 [0.06, 0.12]       |
| Obstructive coronary artery disease present                                                                                                                                                                                                                                                   | 1246                                            | 3663               | 34.0% | 19923                                           | 44404                | 44.9% | 0.16 [0.05, 0.54]       |
| Multivessel disease present                                                                                                                                                                                                                                                                   | 593                                             | 2147               | 27.6% | 11839                                           | 41715                | 28.4% | 0.40 [0.19, 0.82]       |
| *Comparing T2MI with T1MI patients, with odds ratio adjusted according to study weighting using random effects meta-analysis<br>ECG=electrocardiograph; RWMA=regional wall motion abnormalities; CI=confidence interval; T2MI=type 2 myocardial infarction; T1MI=type 1 myocardial infarction |                                                 |                    |       |                                                 |                      |       |                         |

Table S8. Troponin measurements.

| Troponin Measurement | Number of Studies | T1MI (min-max) | T2MI (min-max) |
|----------------------|-------------------|----------------|----------------|
| Baseline cTn (xULN)  | 12                | 0.14-190       | 0.1-8.2        |
| 6h cTn (xULN)        | 4                 | 13.2-142       | 4.25-11        |
| Peak cTn (xULN)      | 20                | 5.1-1703       | 2.8-447        |

Abbreviations: xULN= times upper limit normal

Figure S1. PRISMA flow diagram.

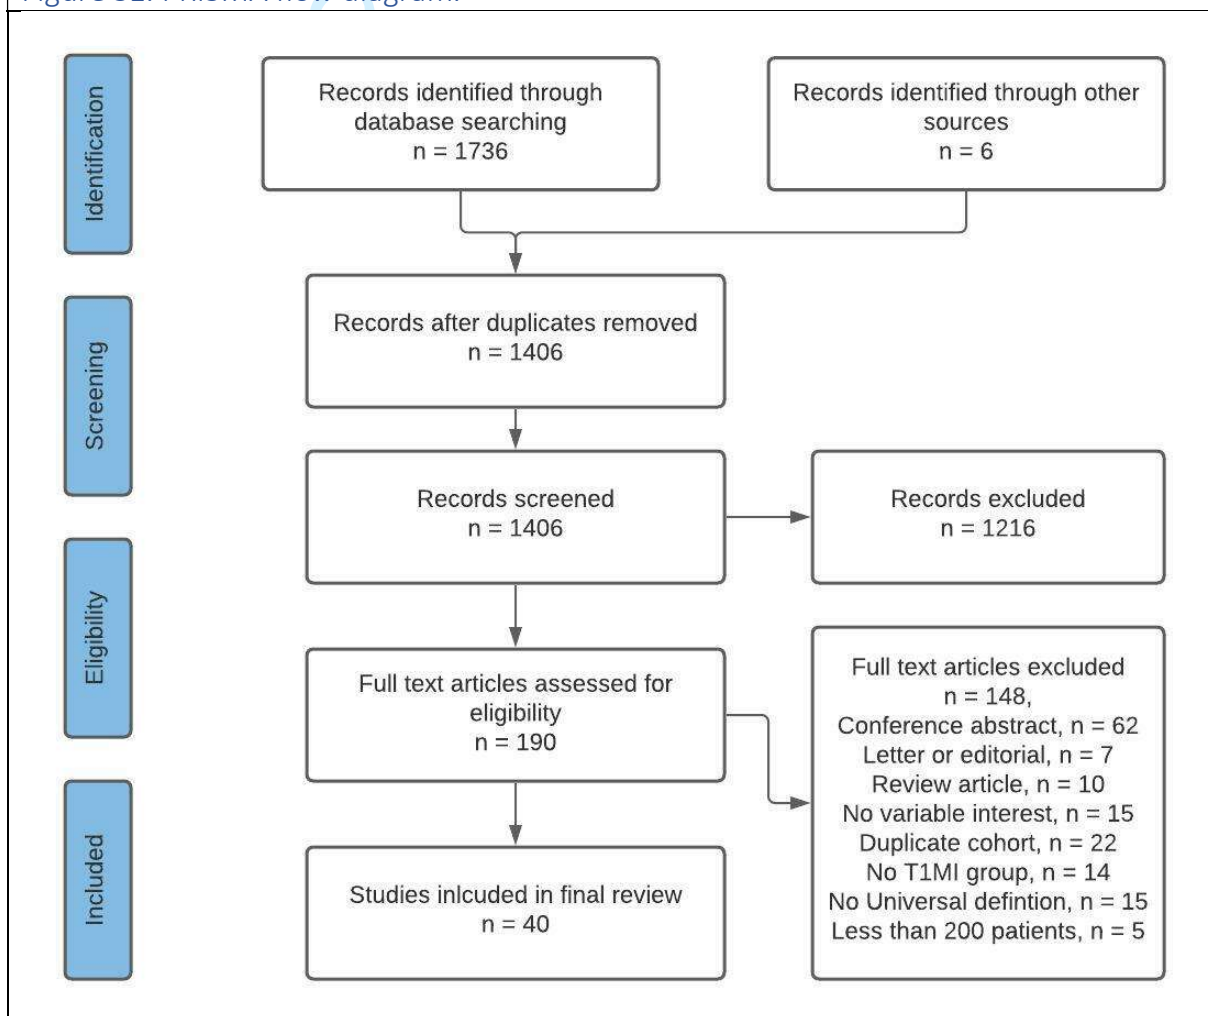

Figure S2. Forest Plot. Presence of Ischaemic Heart Disease.

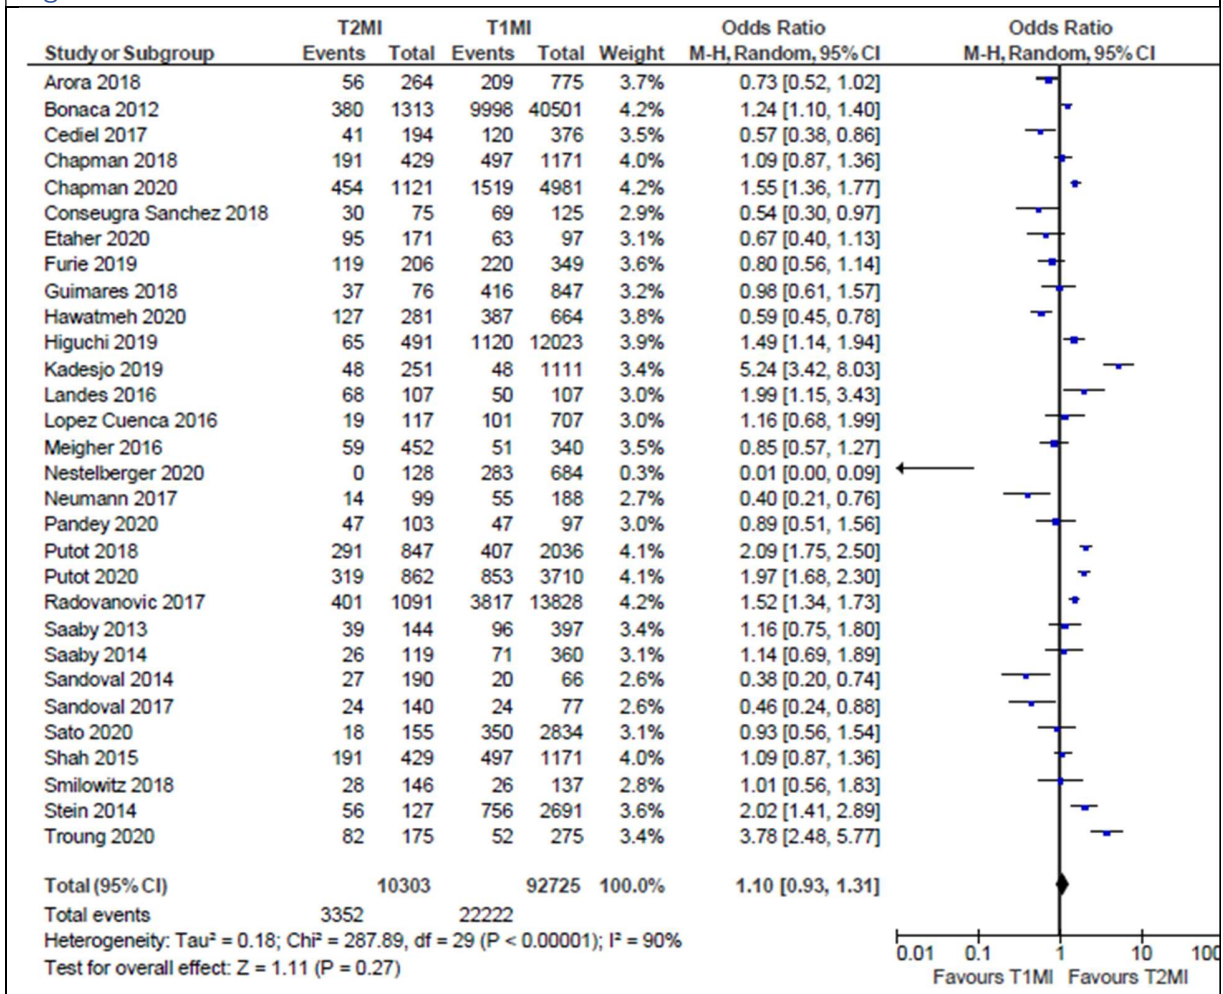

Figure S3. Forest Plot. Presence of Type 2 Diabetes Mellitus.

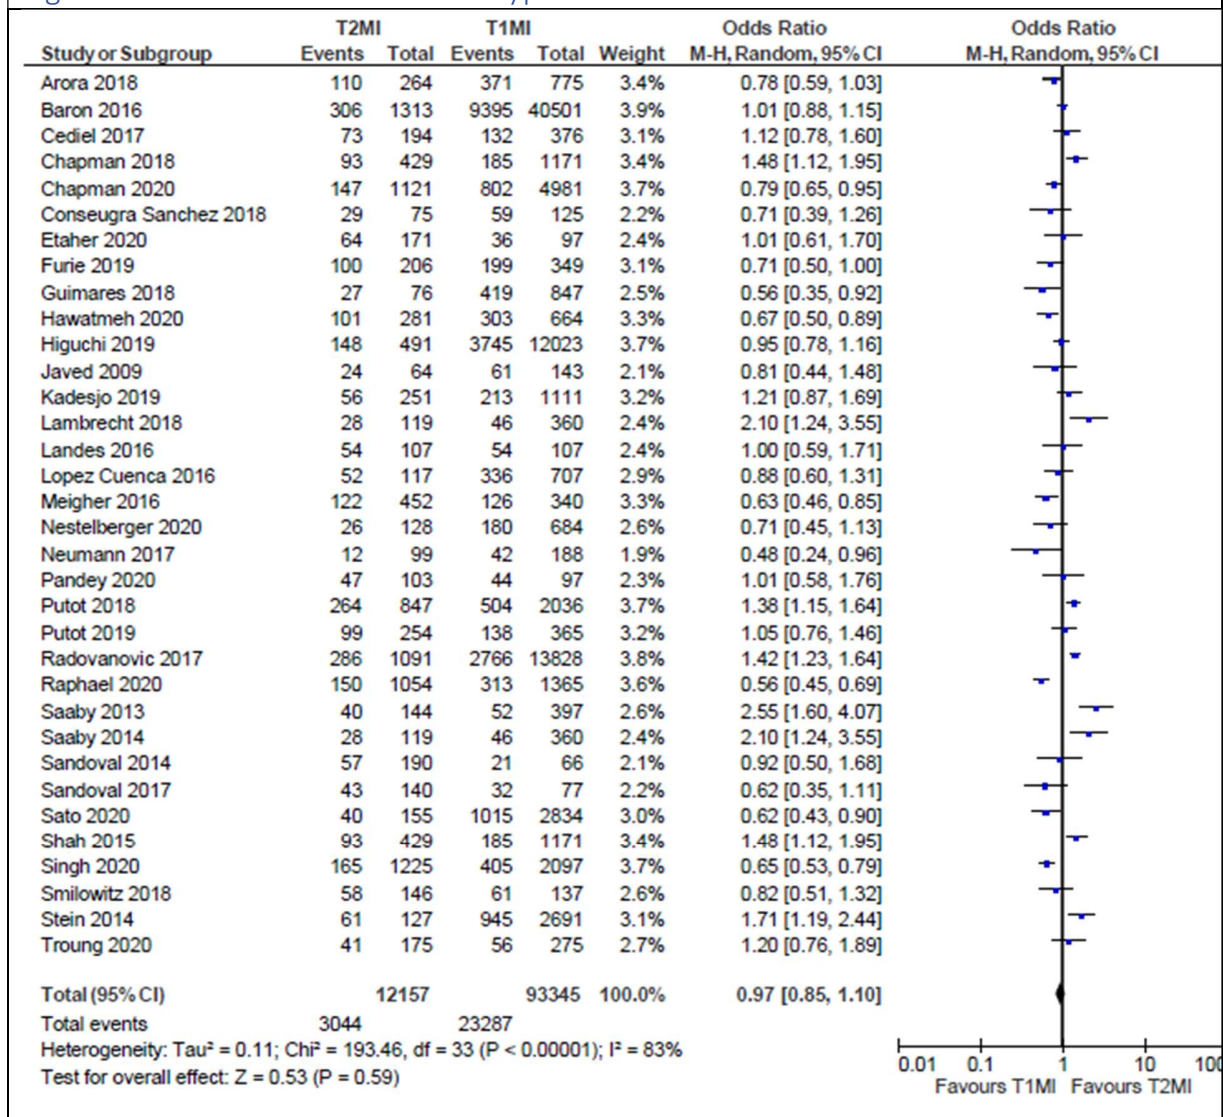

Figure S4. Forest Plot. Presence of Hypertension.

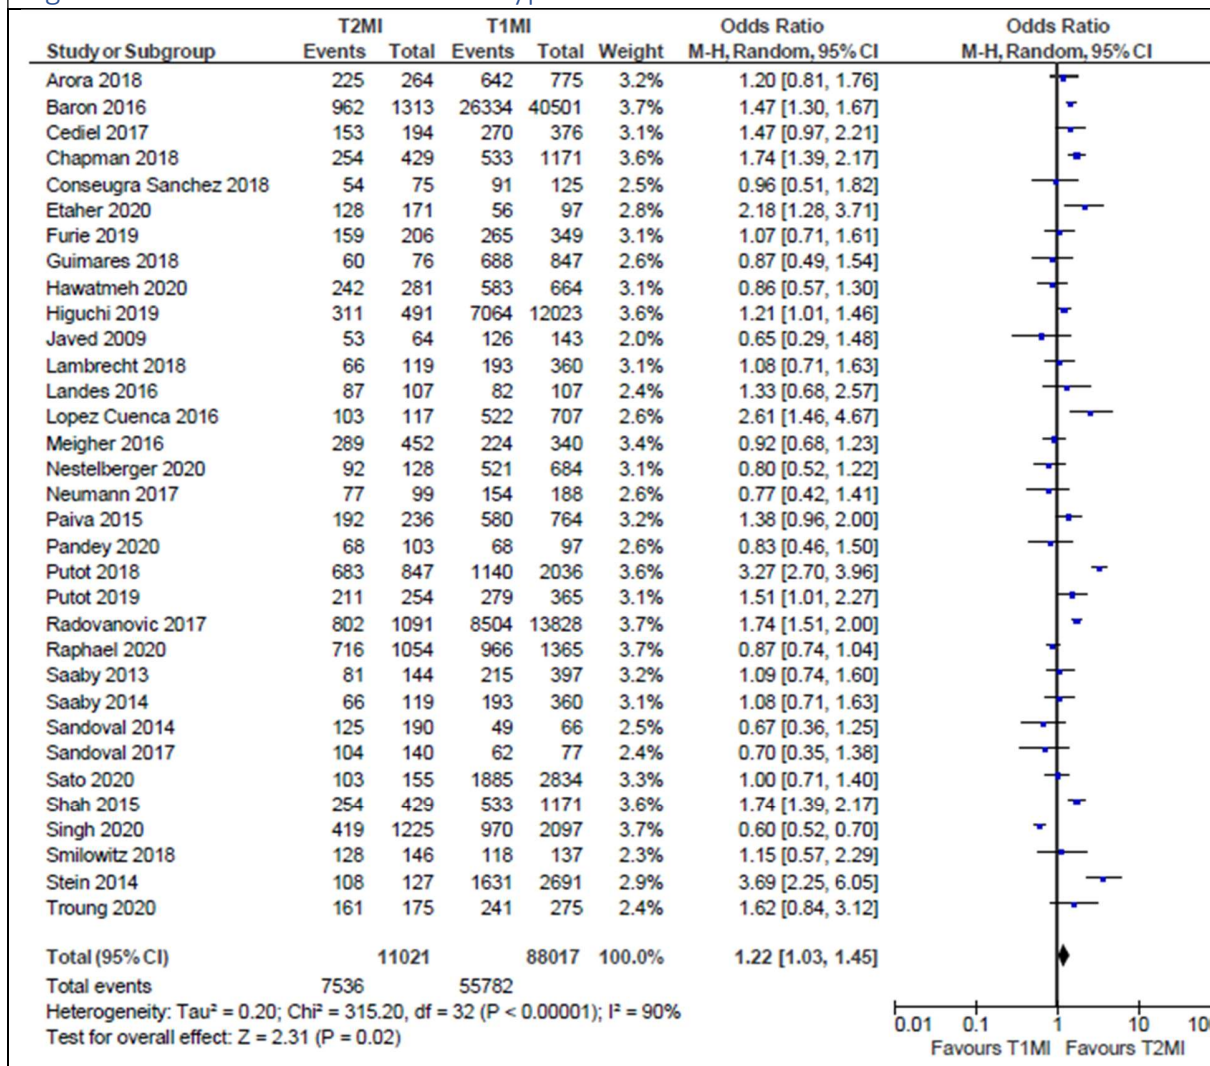

Figure S5. Forest Plot. Presence of Dyslipidaemia.

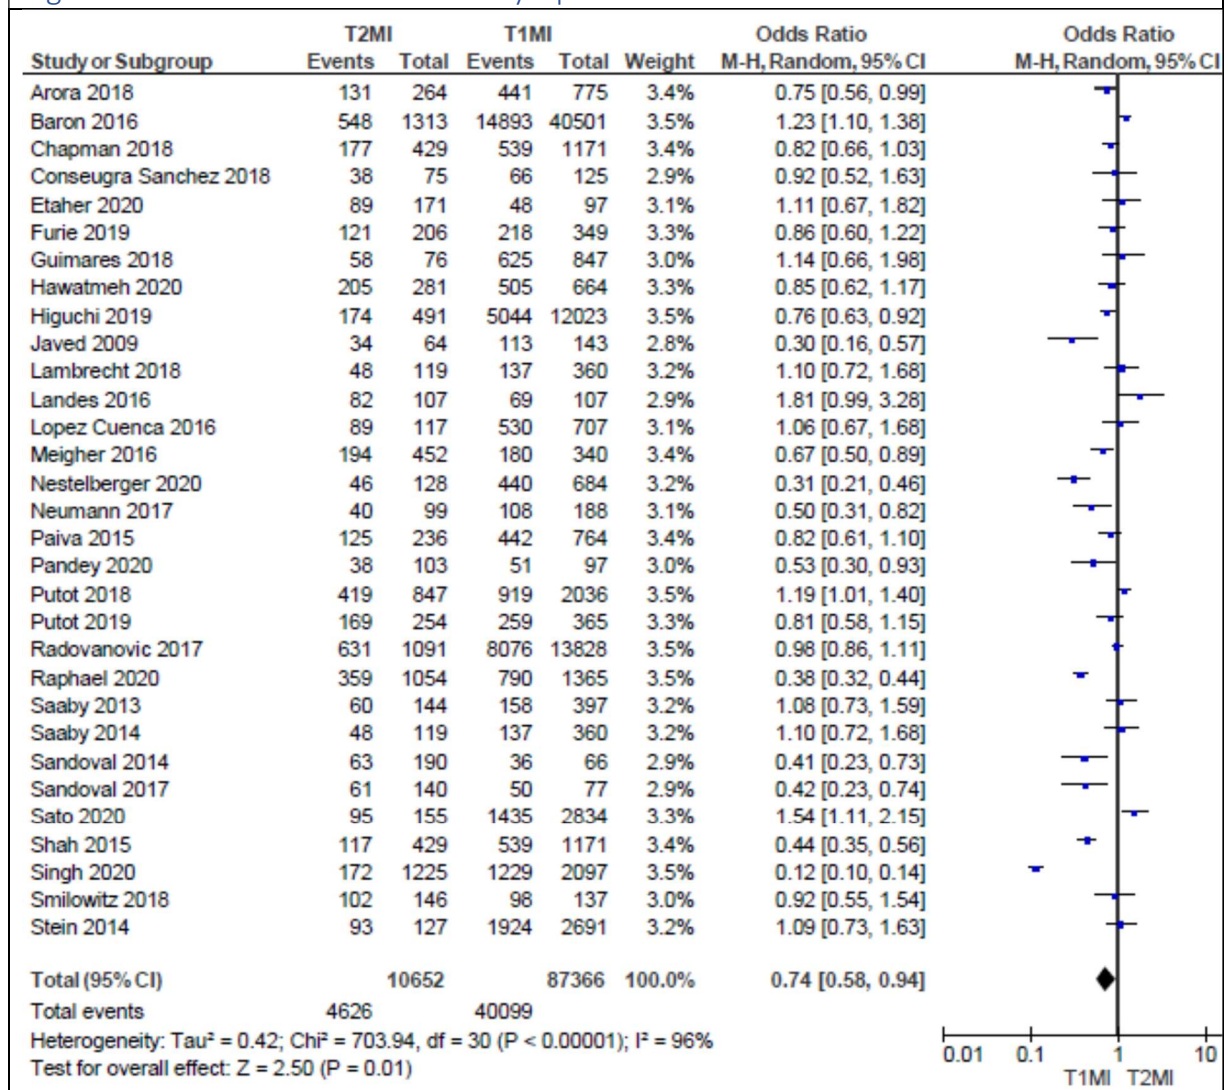

Figure S6. Forest Plot. Smoking Status.

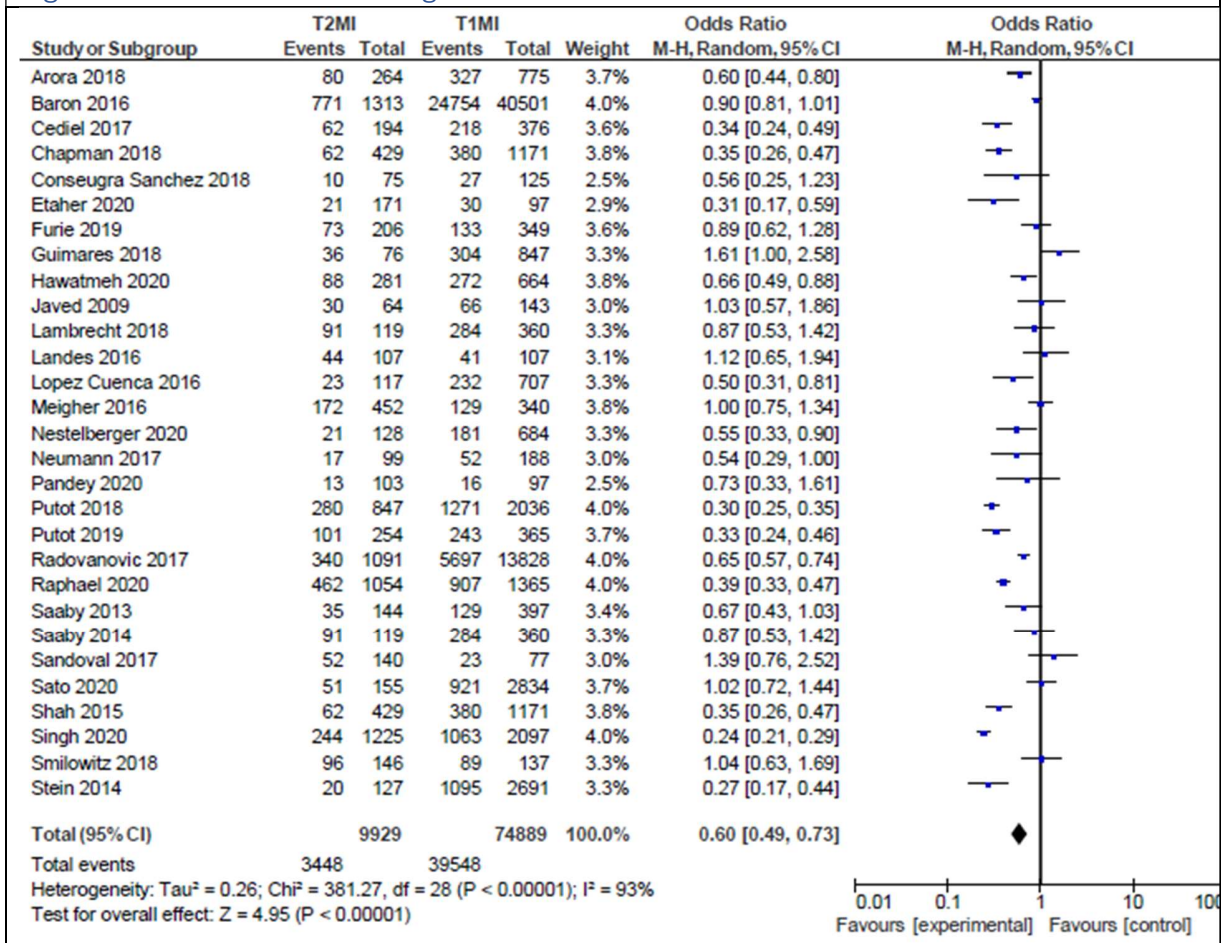

Figure S7. Forest Plot. Obesity Status.

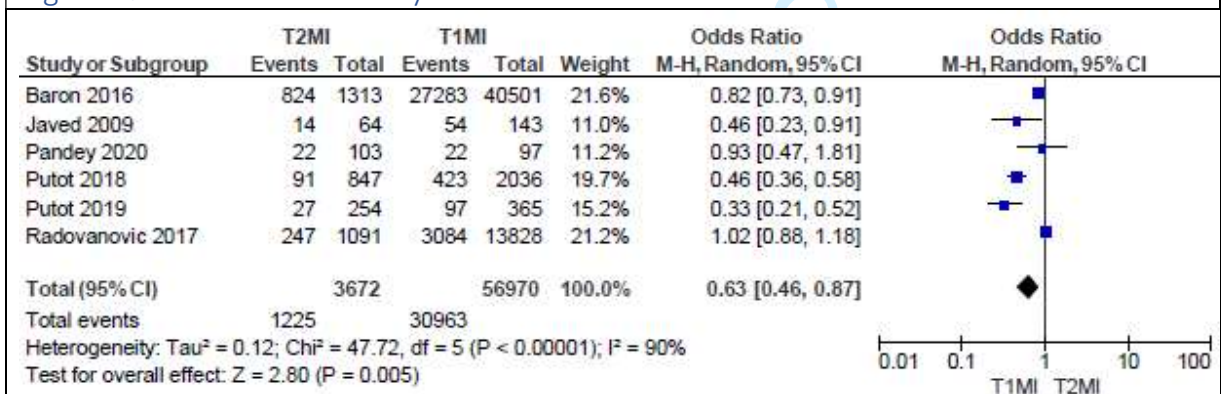



Figure S8. Forest Plot. Presence of Chronic Kidney Disease.

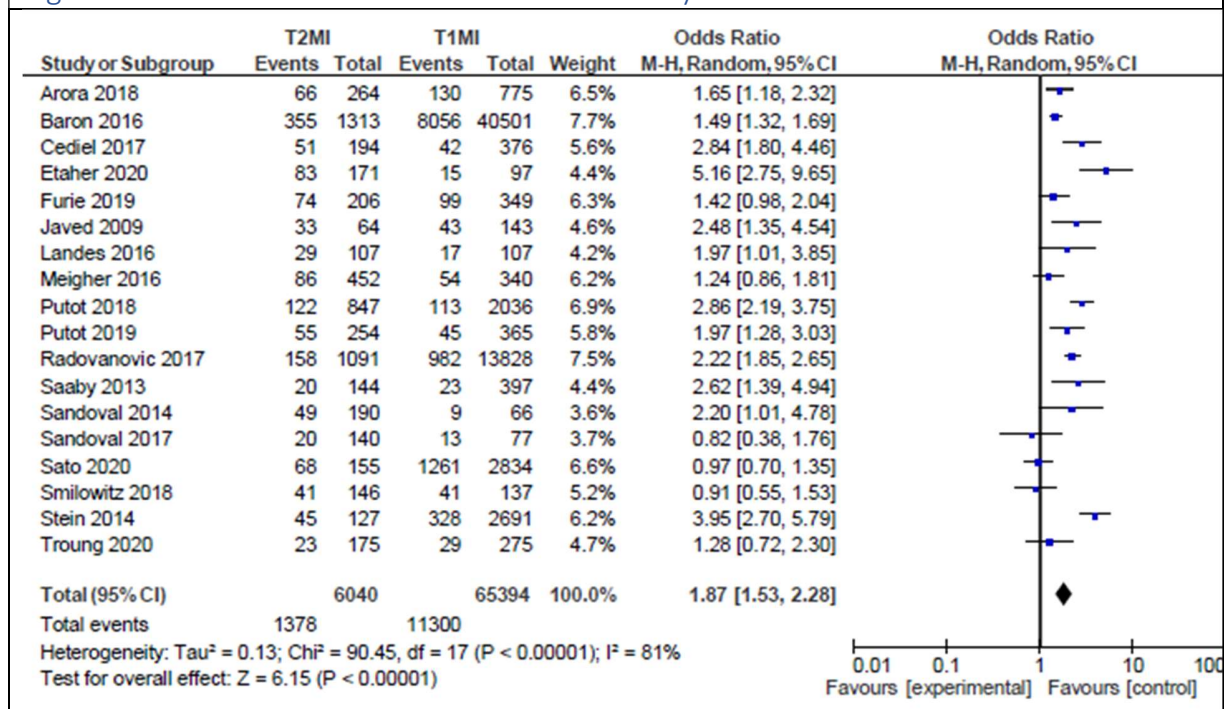

Figure S9. Forest Plot. Presence of Heart Failure.

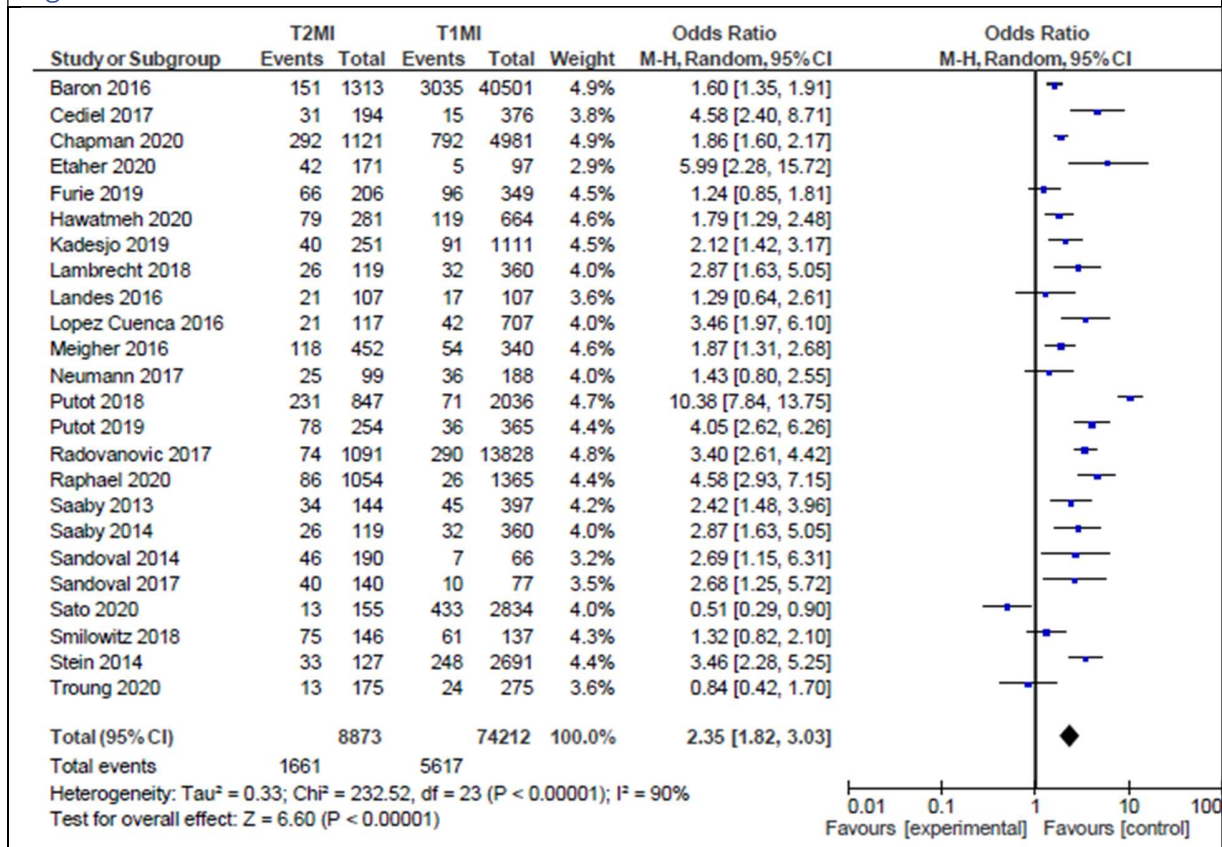

Figure S10. Forest Plot. Presence of Peripheral Vascular Disease.

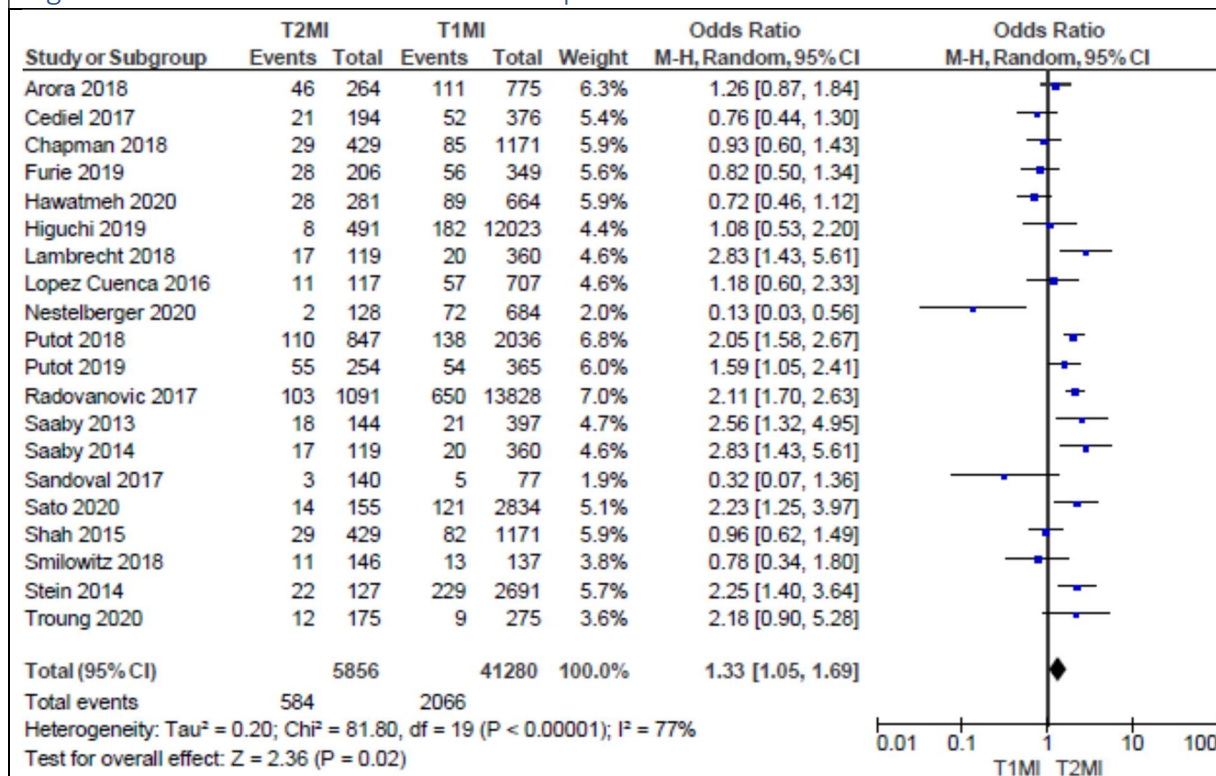

Figure S11. Forest Plot. Presence of Cerebrovascular Disease.

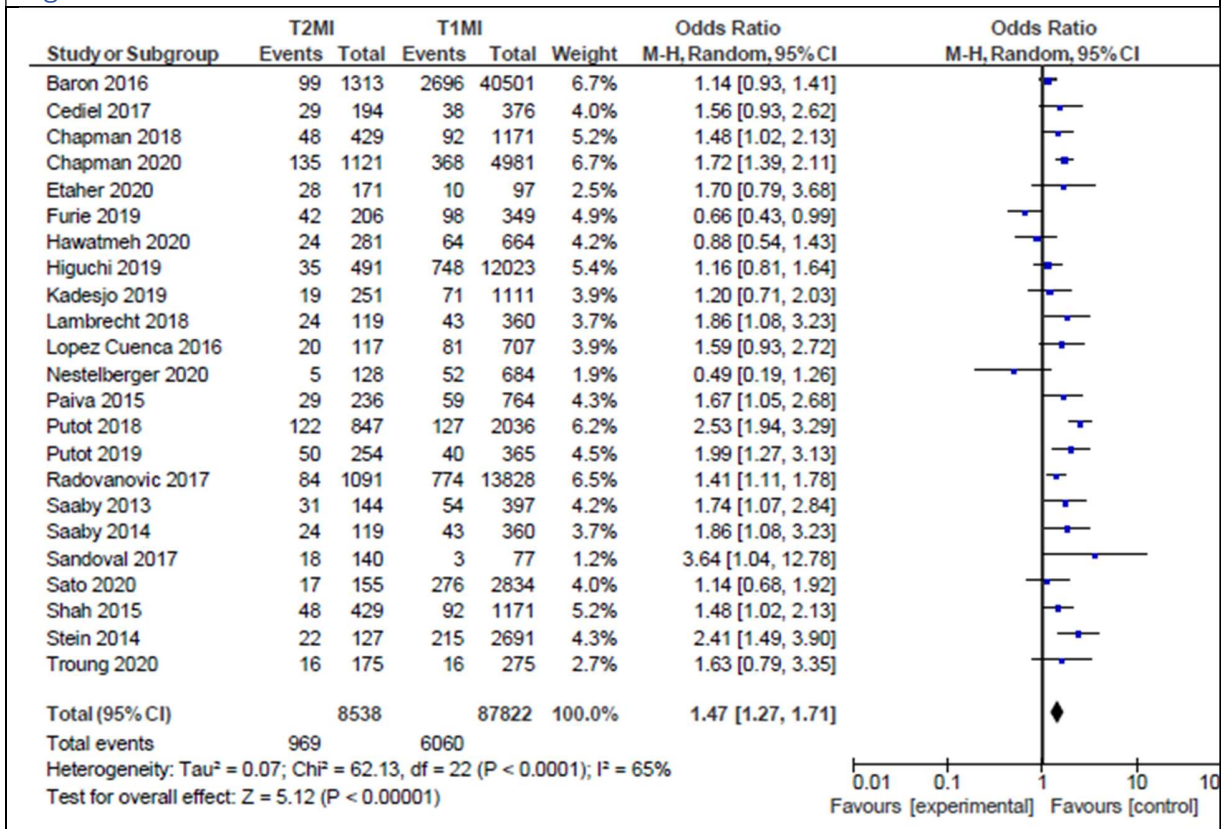

Figure S12. Forest Plot. Presence of Illicit Drug Use.

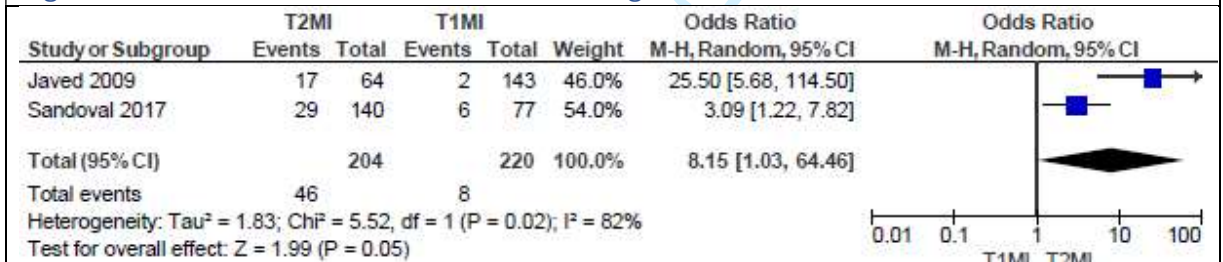

Figure S13. Forest Plot. Presence of Atrial Fibrillation.



Figure S14. Forest Plot. Chest Pain as Presenting Feature.

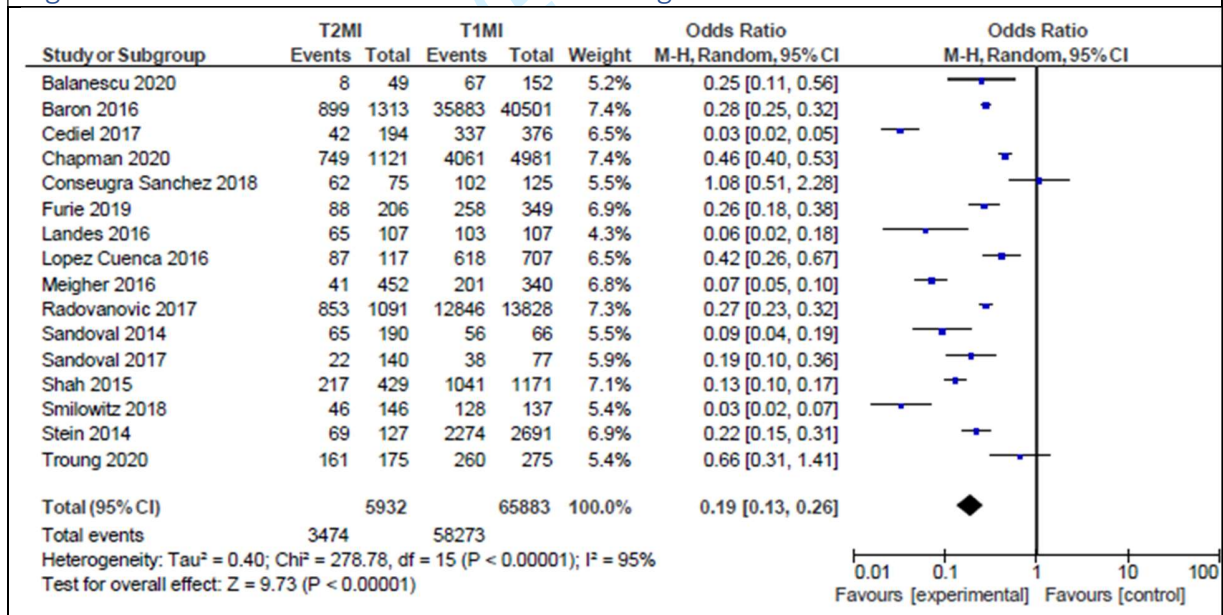

Figure S15. Forest Plot. Dyspnoea as Presenting Feature.

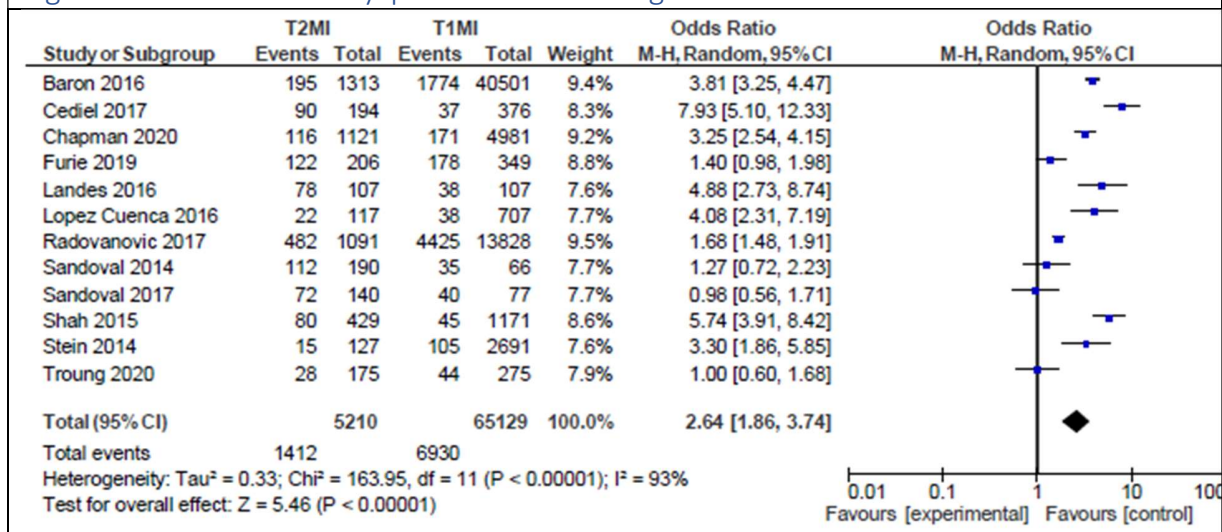

Figure S16. Forest Plot. Arm / Shoulder Discomfort as Presenting Feature.

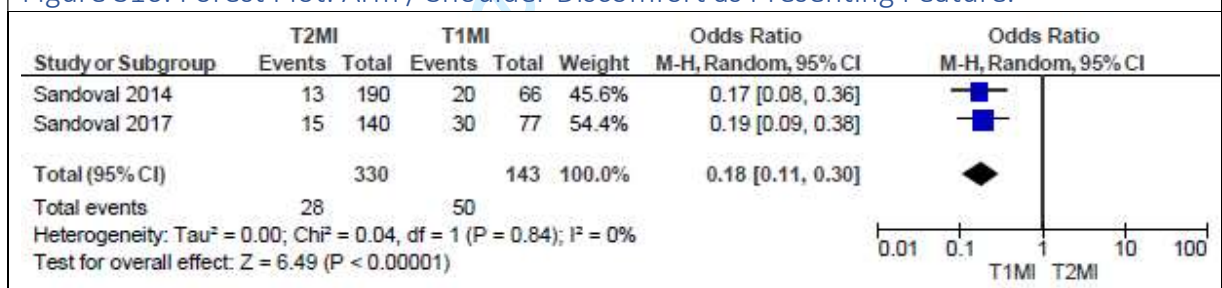

Figure S17. Forest Plot. Nausea / Vomiting as Presenting Feature.

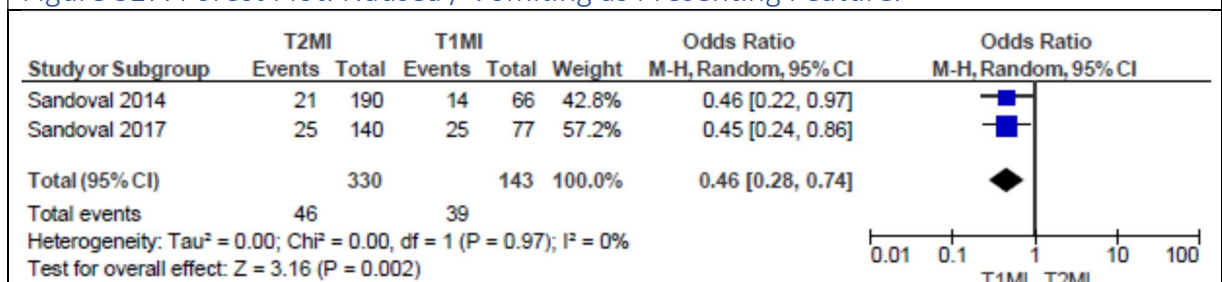

Figure S18. Forest Plot. Non-specific Symptoms as Presenting Features.

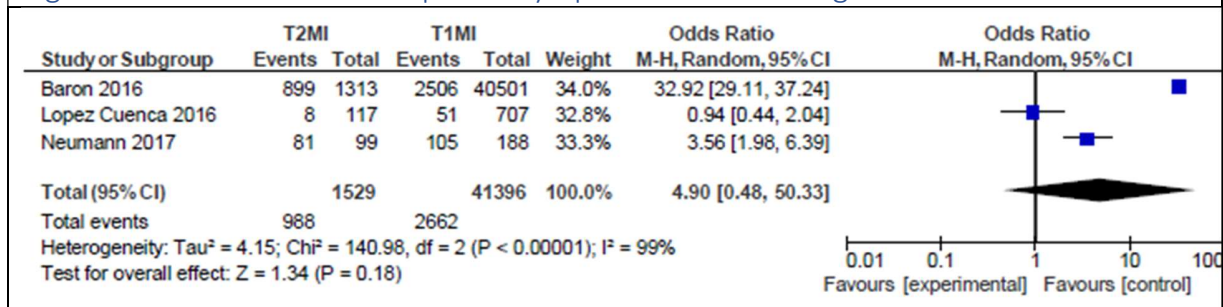

Figure S19. Forest Plot. Collapse / Syncope as Presenting Features.

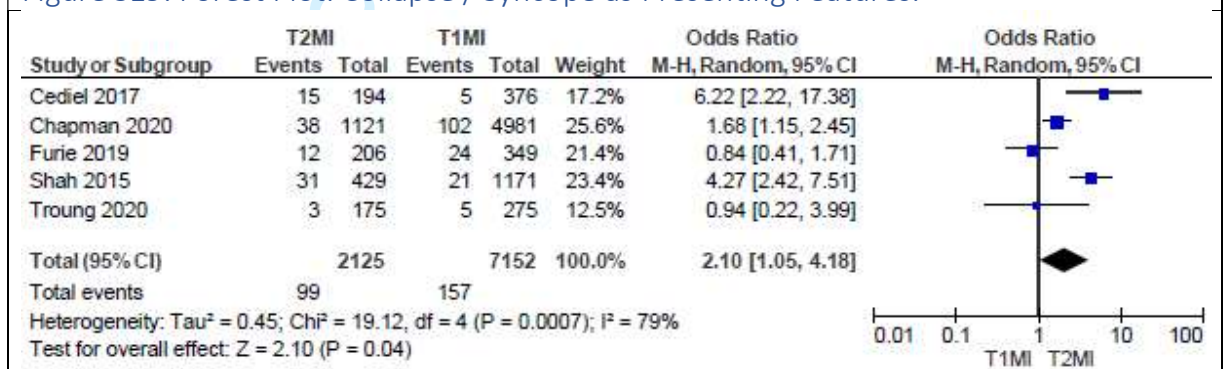

Figure S20. Forest Plot. ST Elevation on ECG.

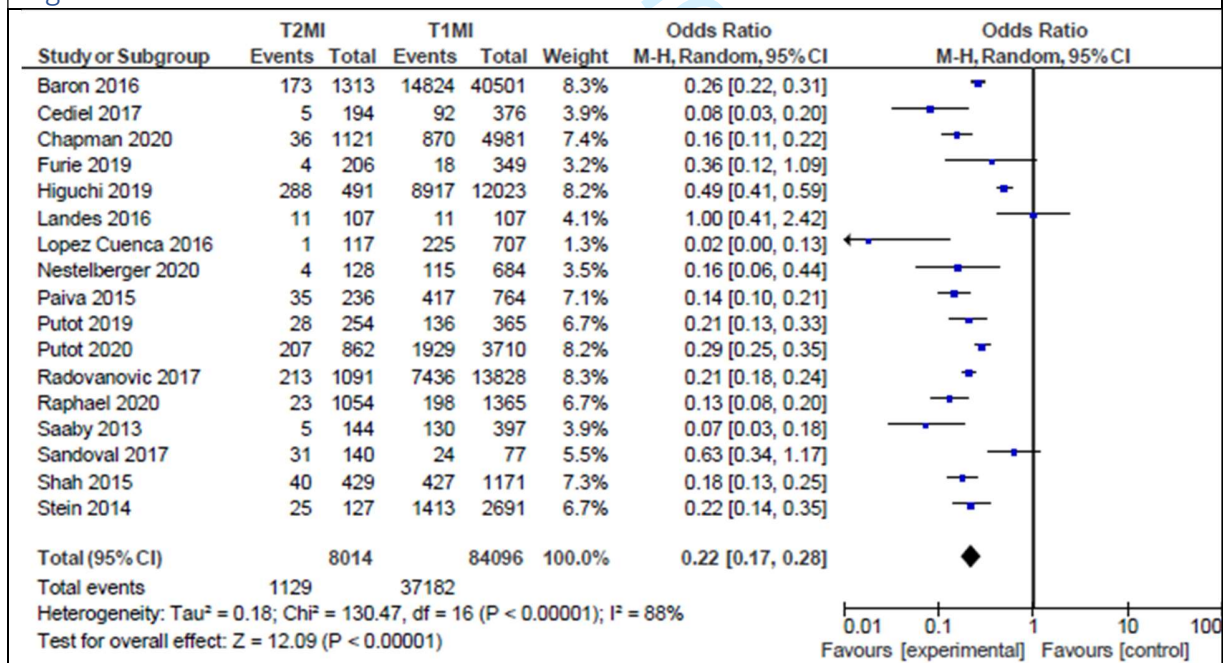

Figure S21. Forest Plot. ST Depression or T Wave Inversion on ECG.

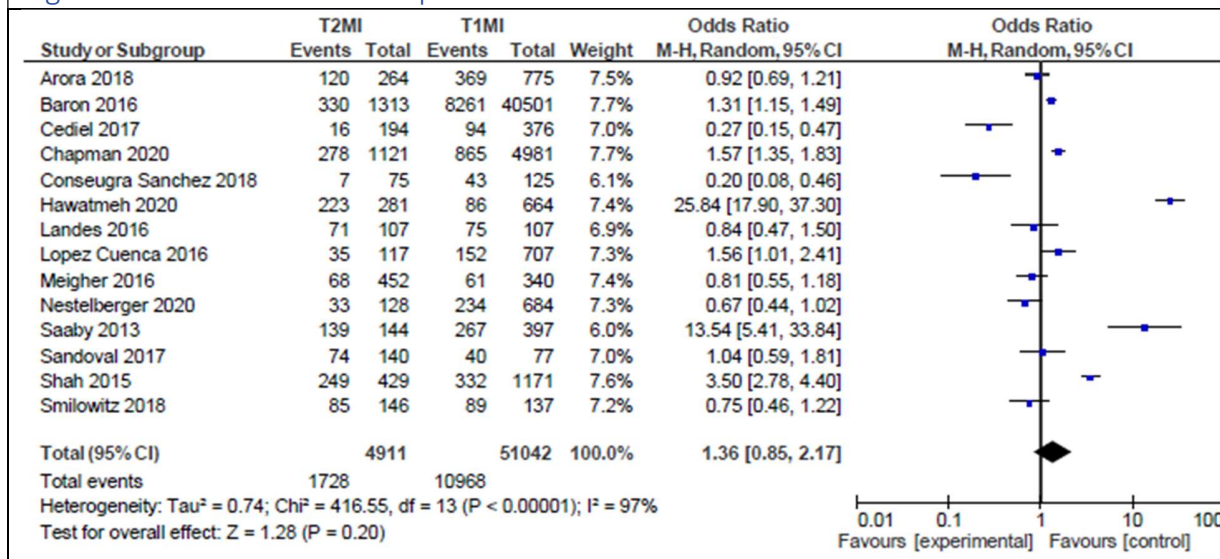

Figure S22. Forest Plot. Q Waves on ECG.

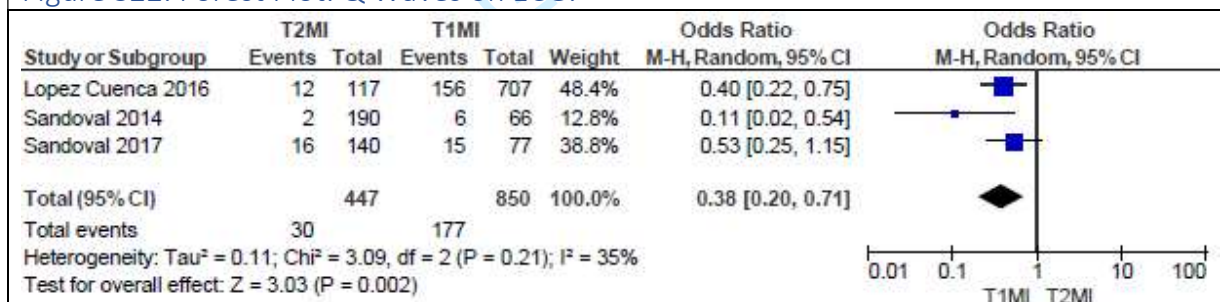

Figure S23. Forest Plot. Non-specific ST Changes on ECG.

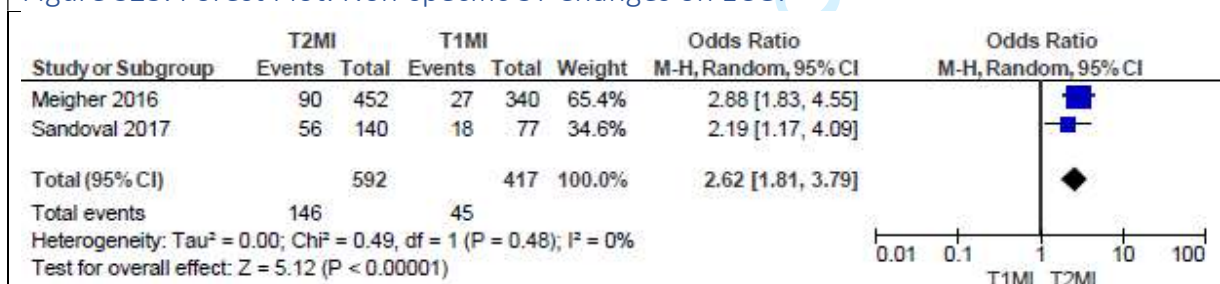



Figure S24. Forest Plot. Left Bundle Branch Block on ECG.

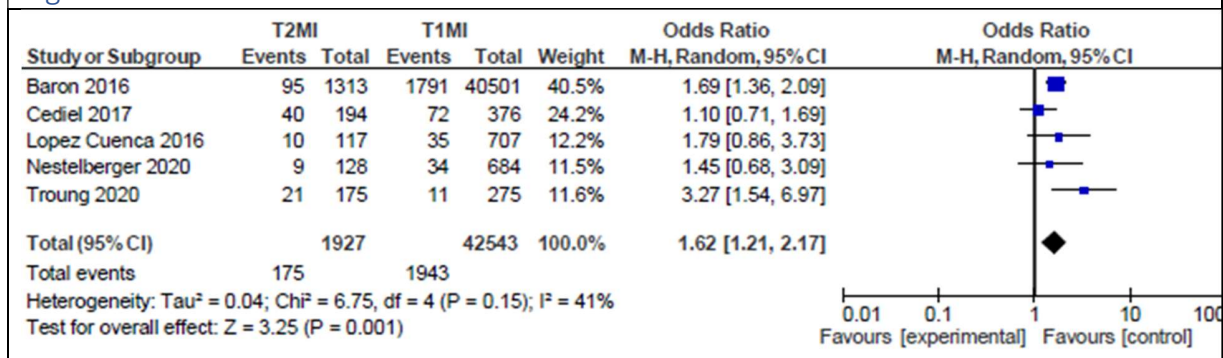

Figure S25. Forest Plot. Atrial Fibrillation on ECG.

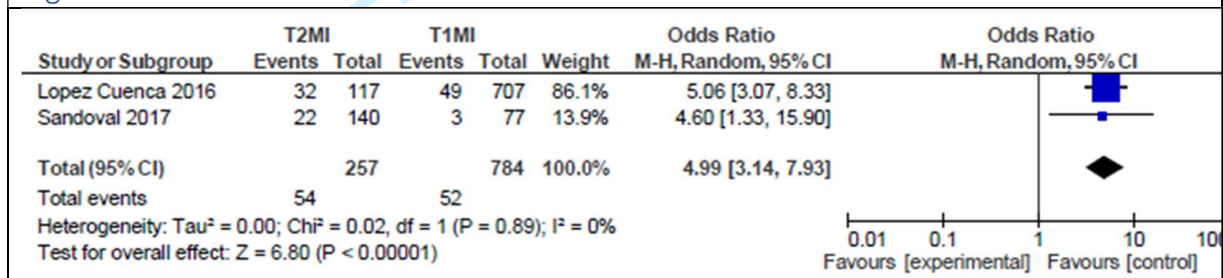

Figure S26. Forest Plot. Coronary Angiogram Performed.

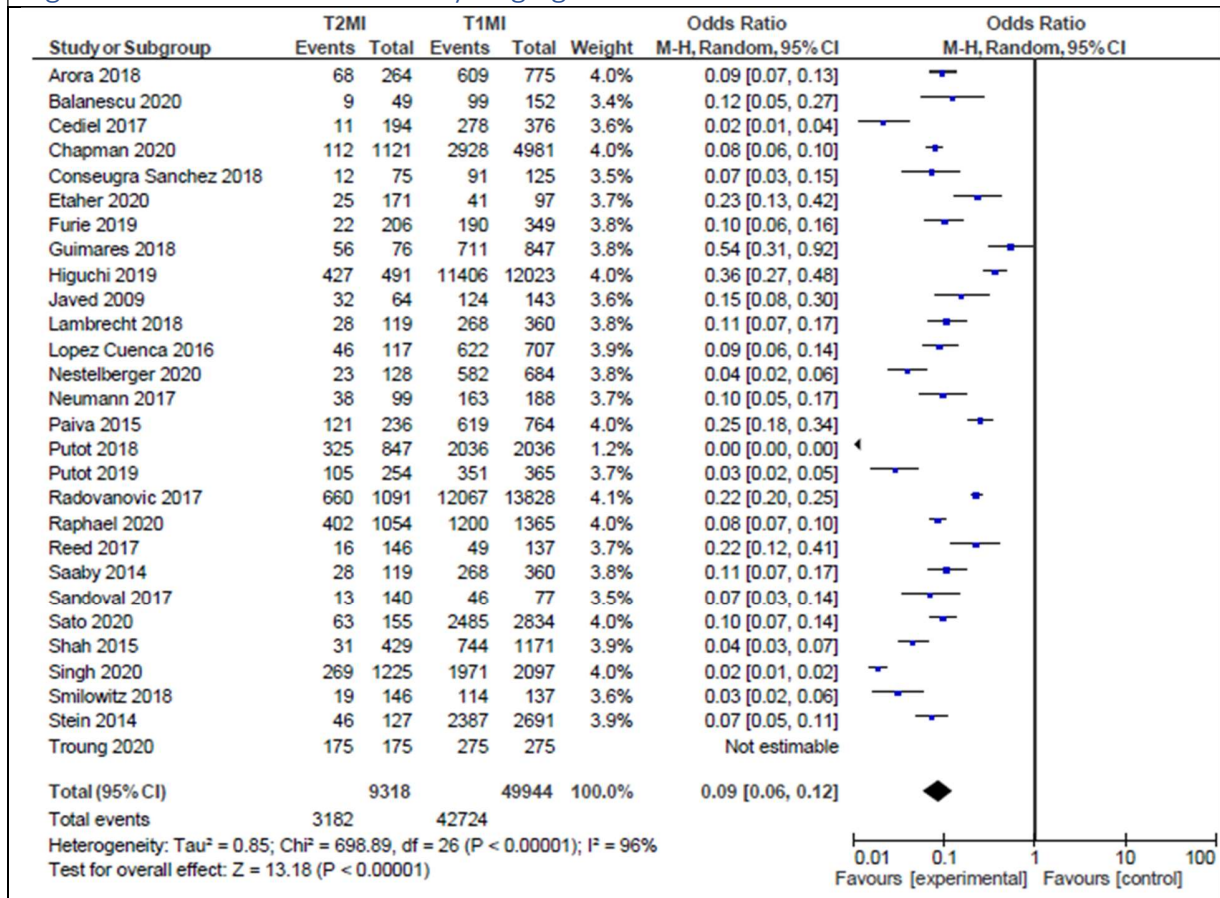

Figure S27. Forest Plot. Obstructive Coronary Artery Disease on Coronary Angiogram.

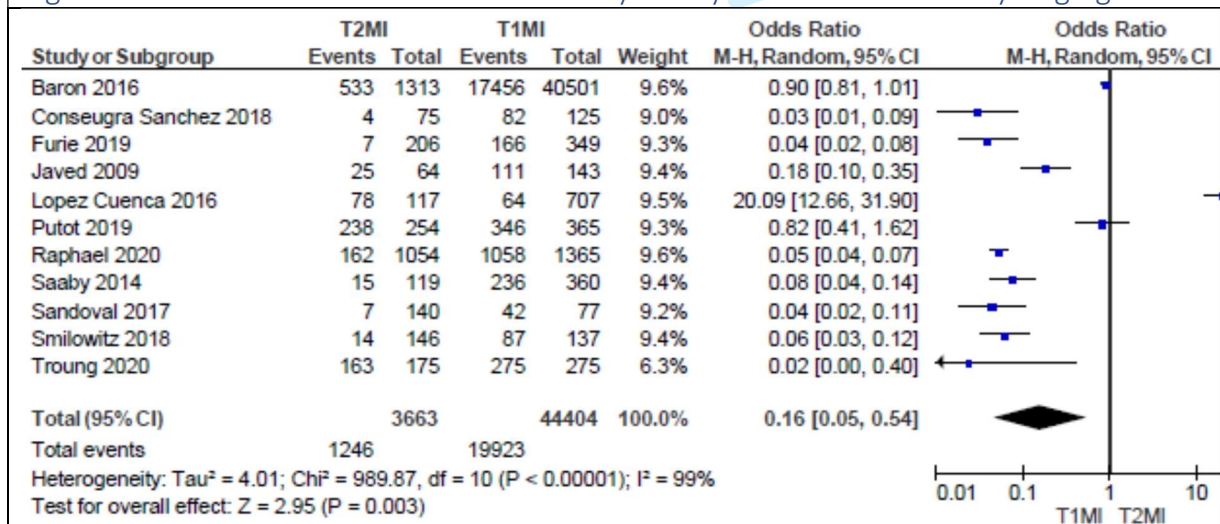

Figure S28. Forest Plot. Multivessel Disease on Coronary Angiogram.

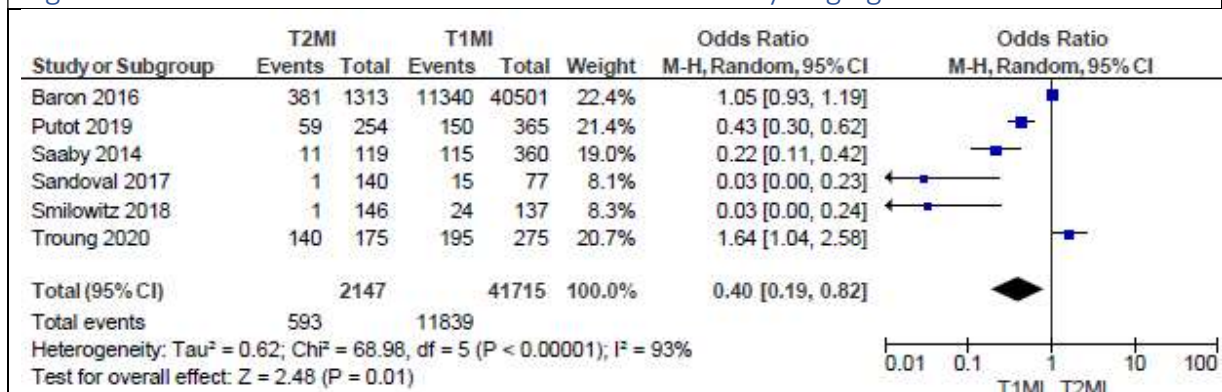

Figure S29. Forest Plot. Echocardiogram Performed.

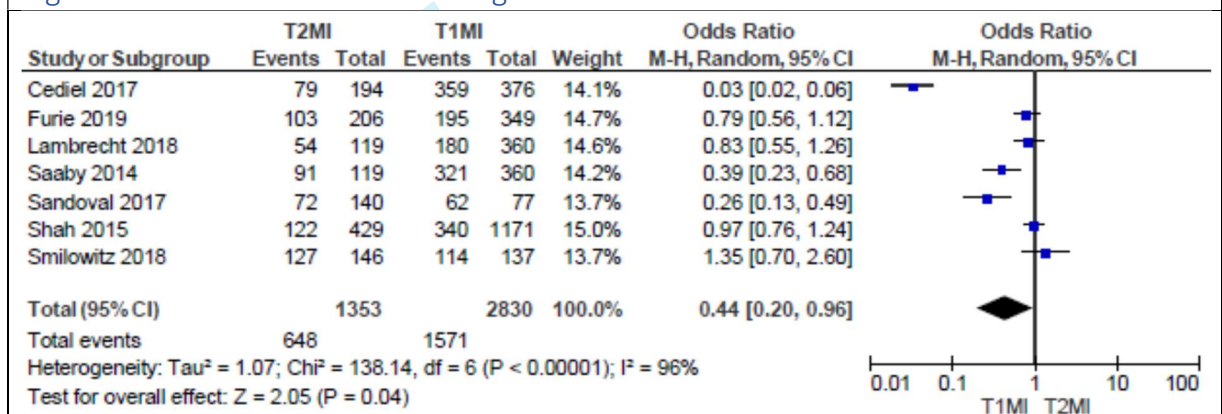

Figure S30. Forest Plot. Regional Wall Motion Abnormalities on Echocardiogram.

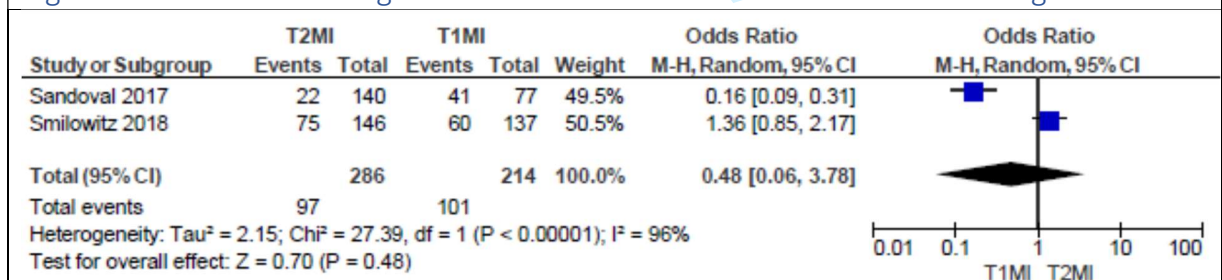

Figure S31. Forest Plot. Beta-Blockers Prescribed.

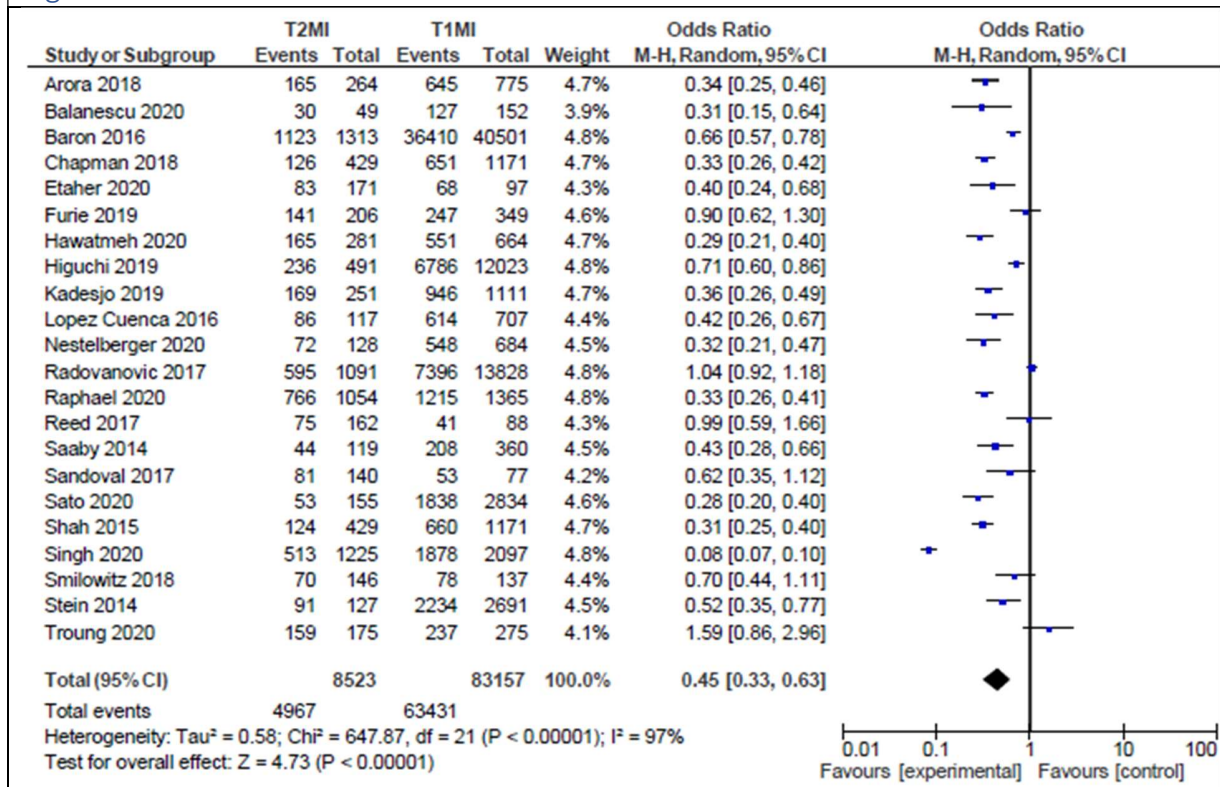

Figure S32. Forest Plot. ACEi/ARB Prescribed.

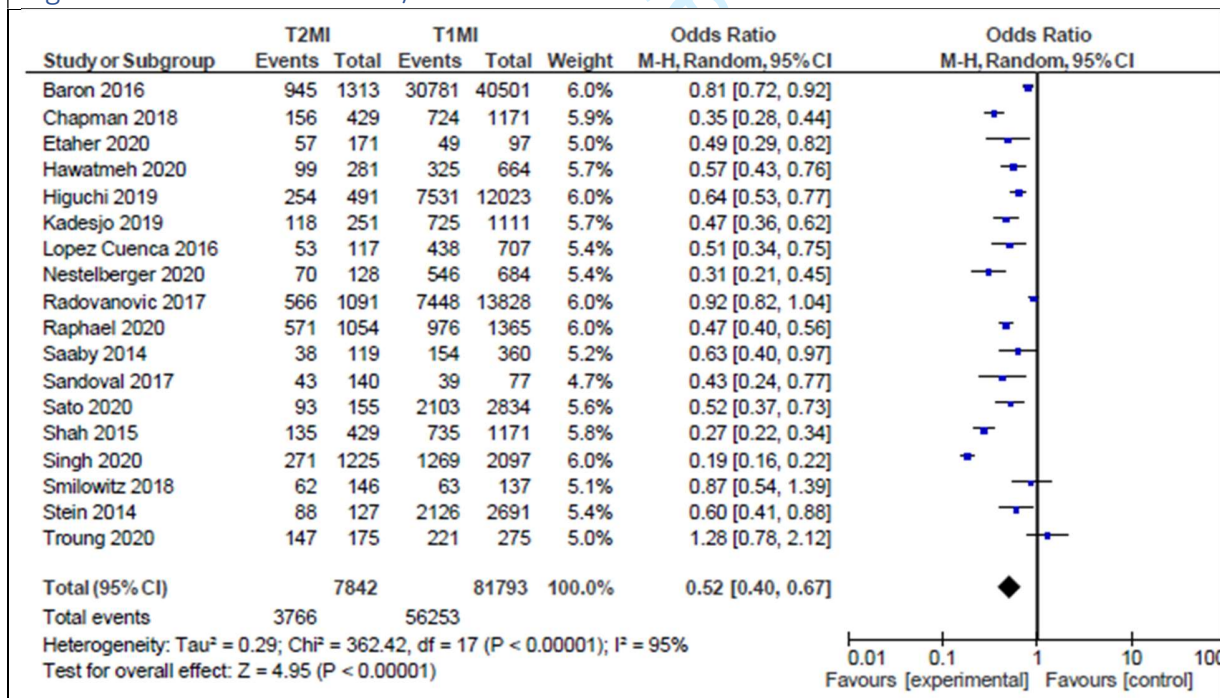

Figure S33. Forest Plot. Antiplatelets Prescribed.

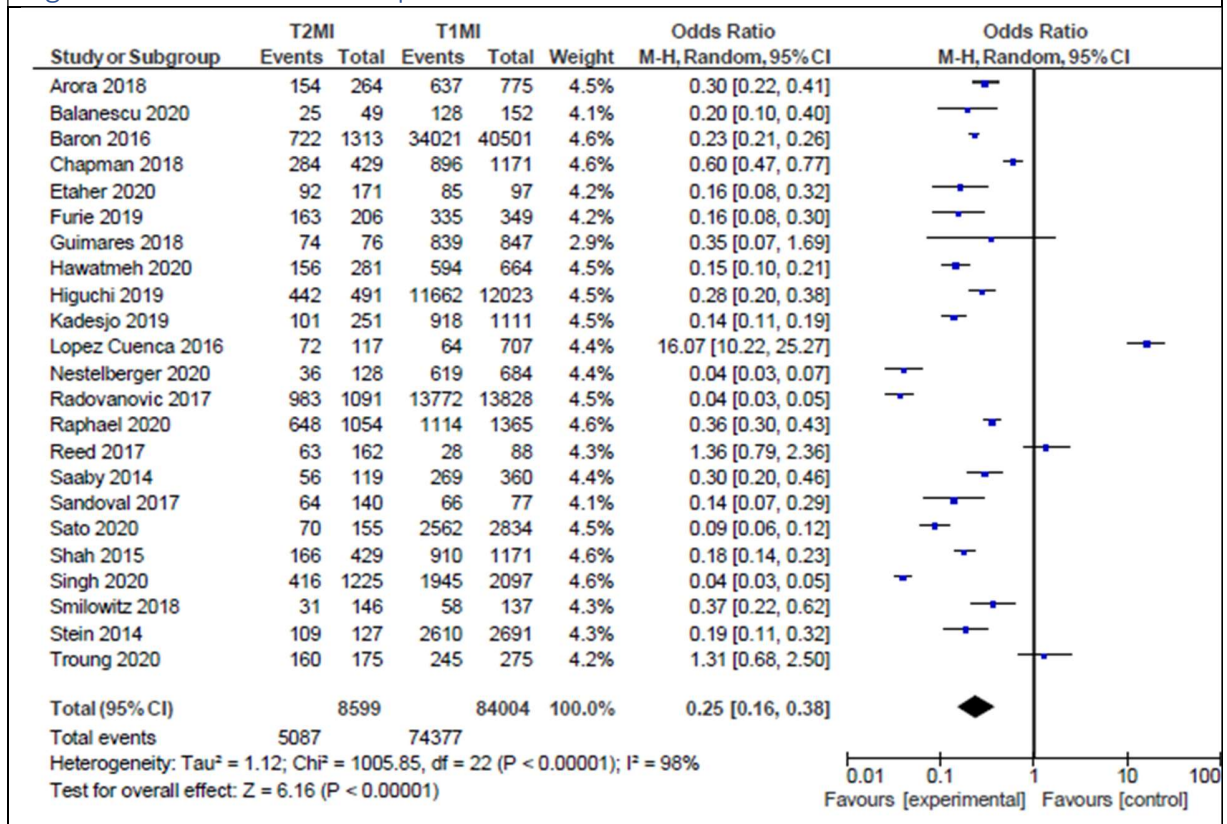

Figure S34. Forest Plot. Anticoagulants Prescribed.

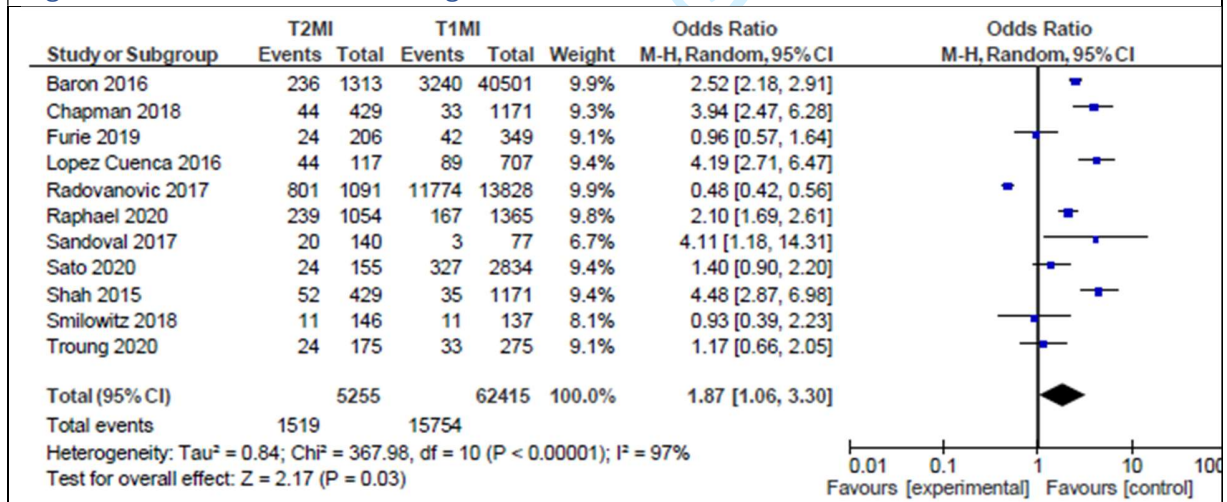

Figure S35. Forest Plot. Antianginal Drugs Prescribed.

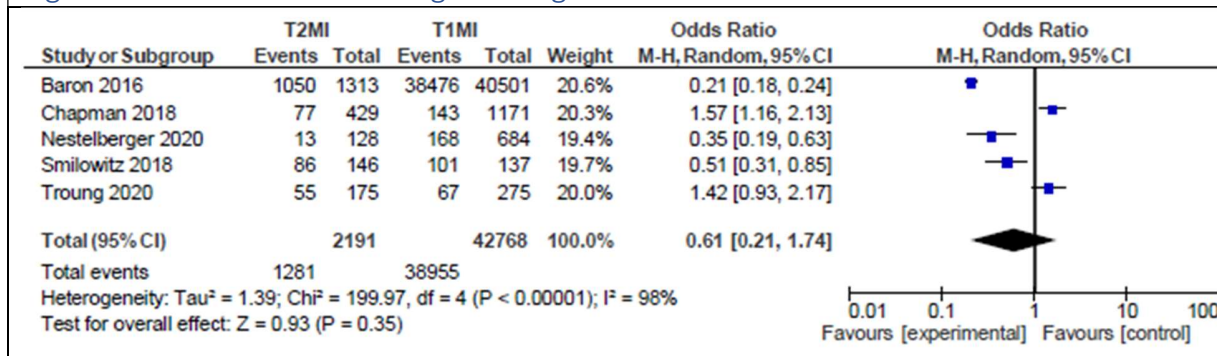

Figure S36. Forest Plot. Diuretics Prescribed.

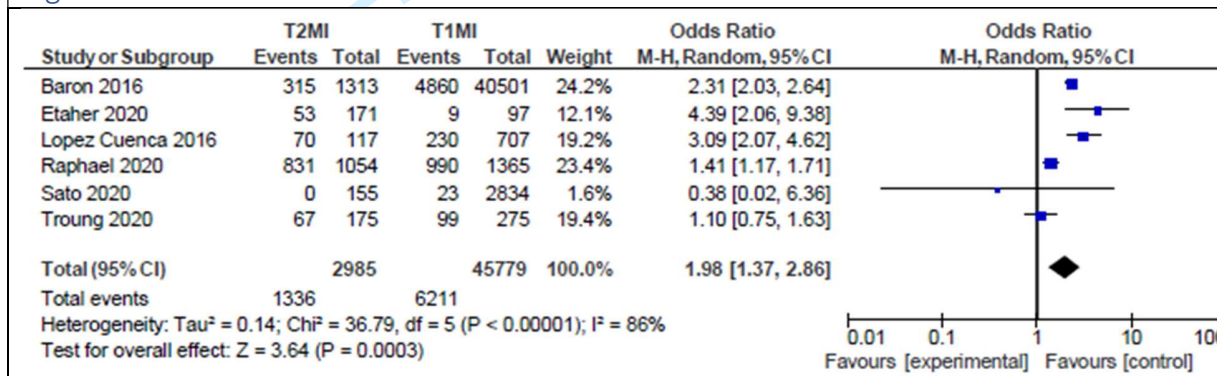

Figure S37. Forest Plot. Statins Prescribed.

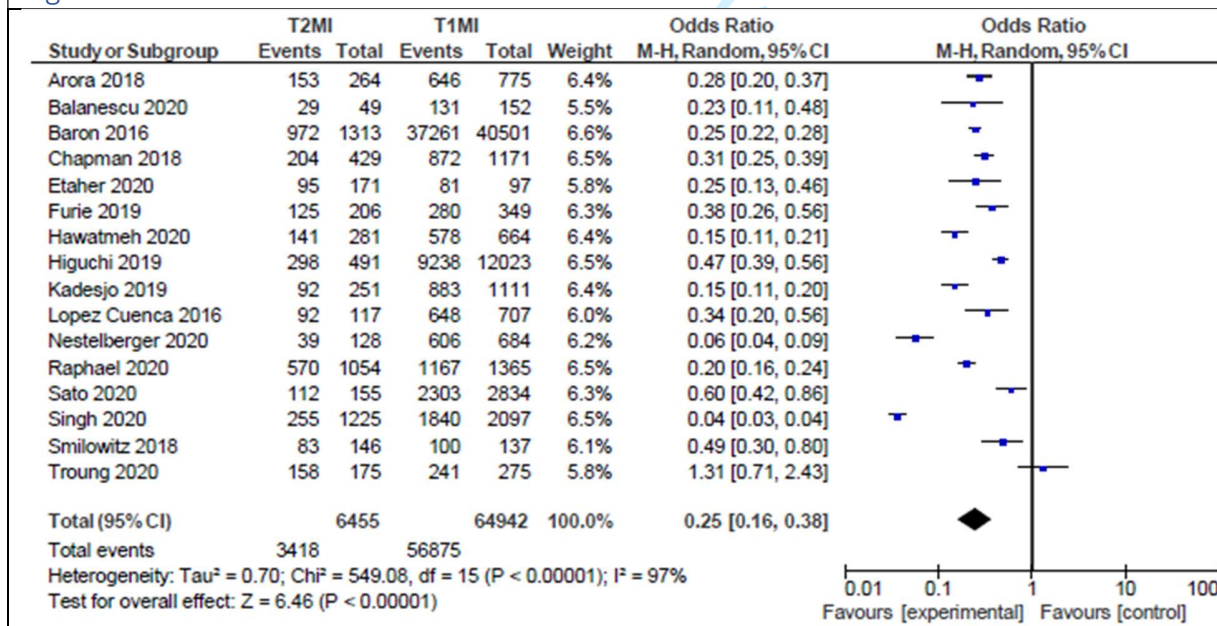

Figure S38. Forest Plot. Percutaneous Coronary Intervention Performed.

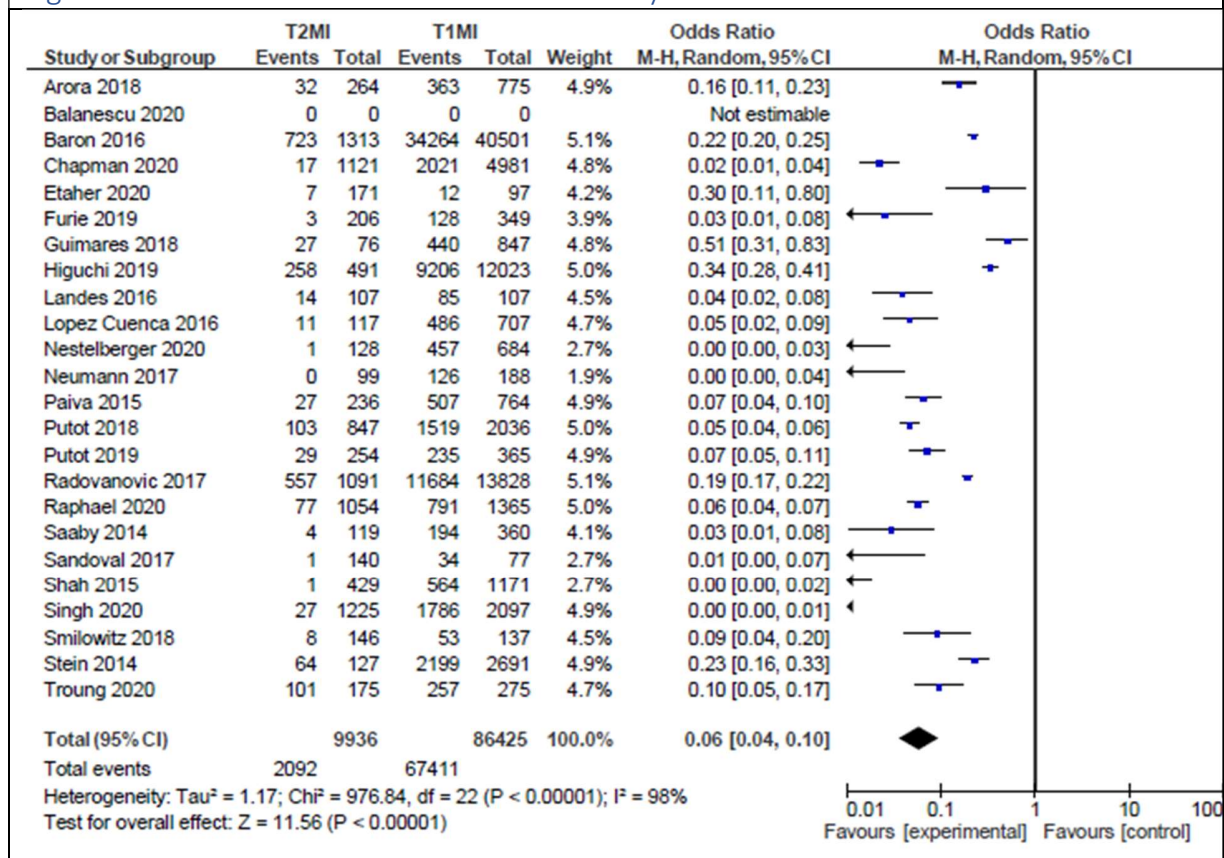

Figure S39. Forest Plot. Coronary Artery Bypass Graft Performed.

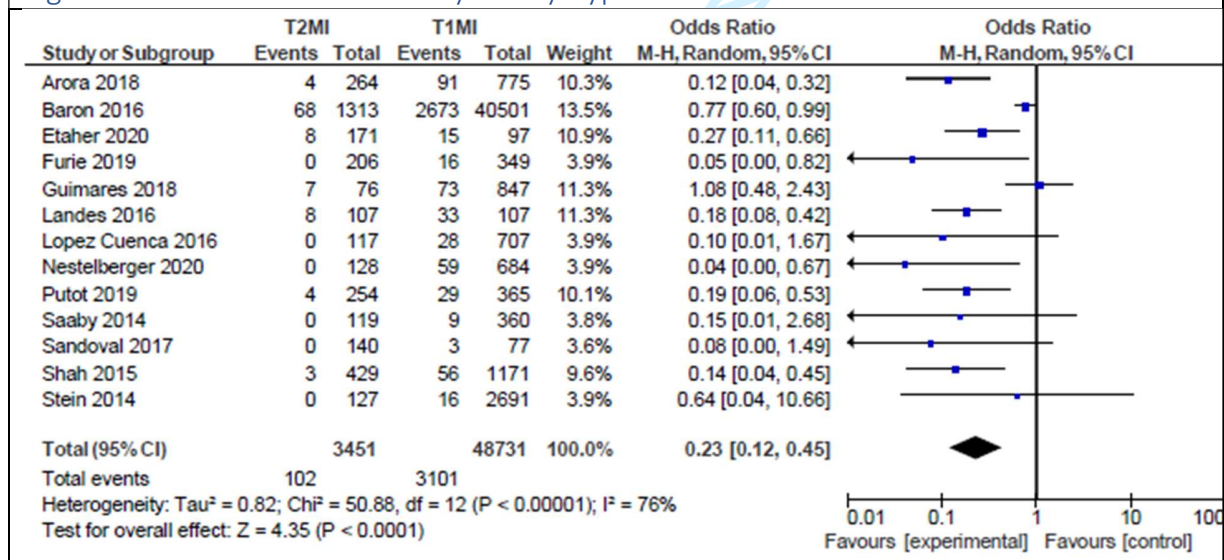

Figure S40. All cause In-hospital mortality. T2MI compared to T1MI.

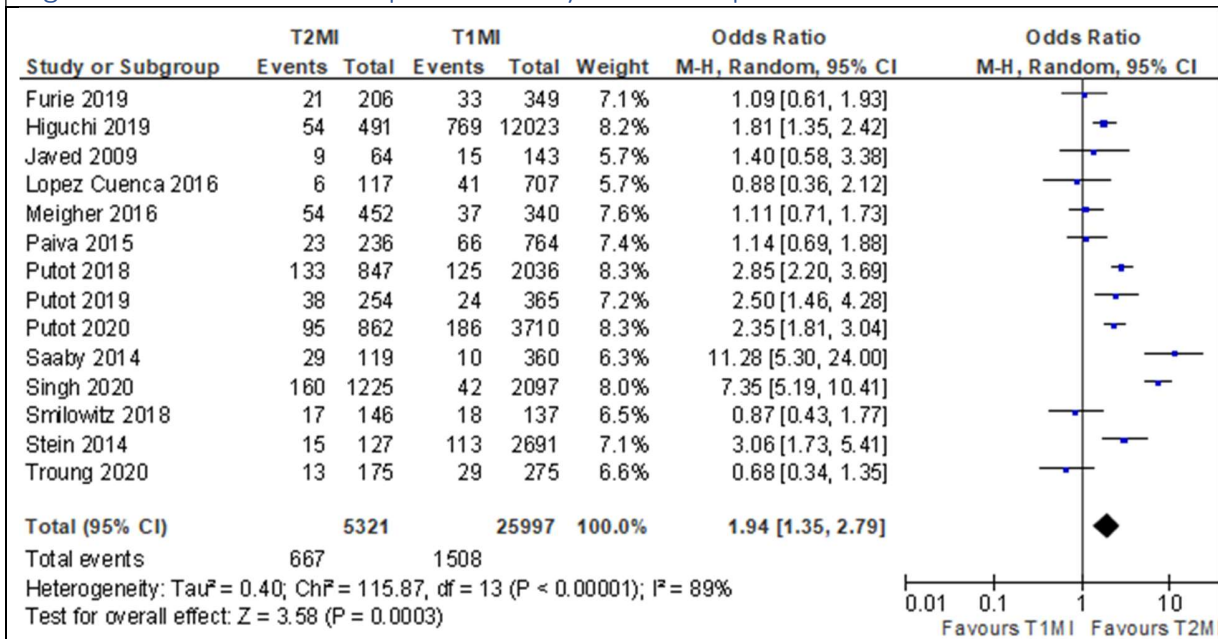

Figure S41. Short-term all-cause mortality. T2MI compared to T1MI.

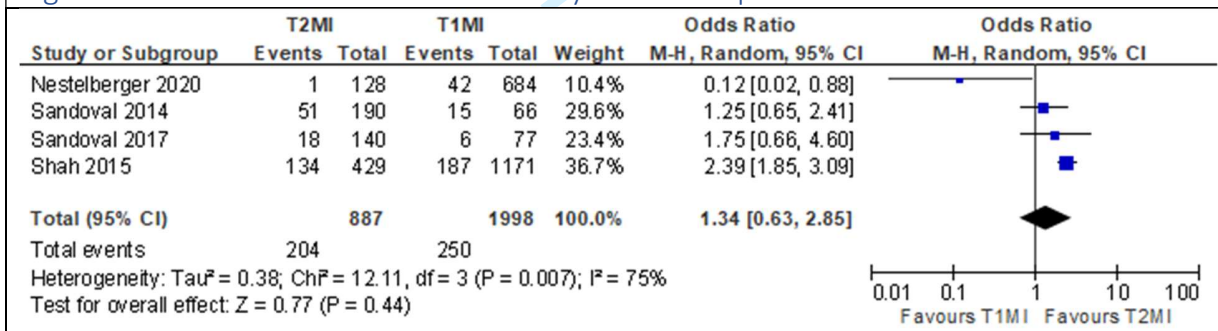

Figure S42. Two-year all-cause mortality. T2MI compared to T1MI.

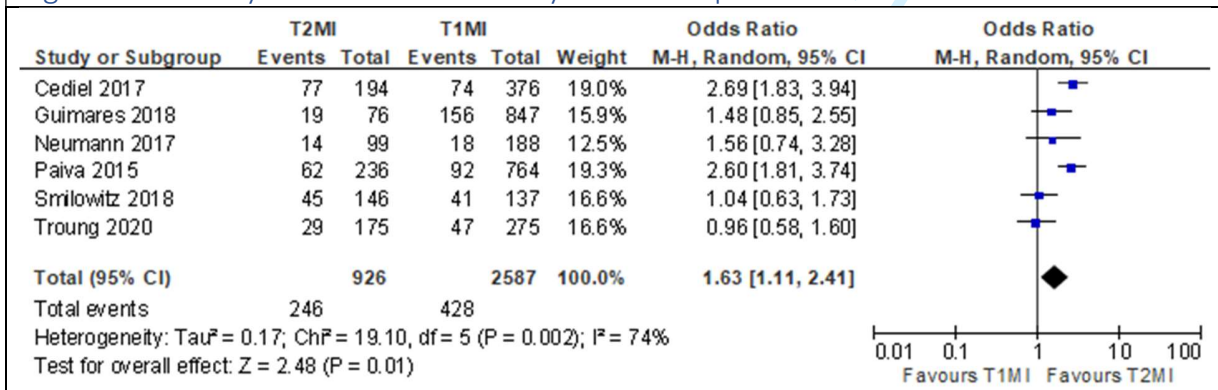



Figure S43. Three-year all-cause mortality. T2MI compared to T1MI.

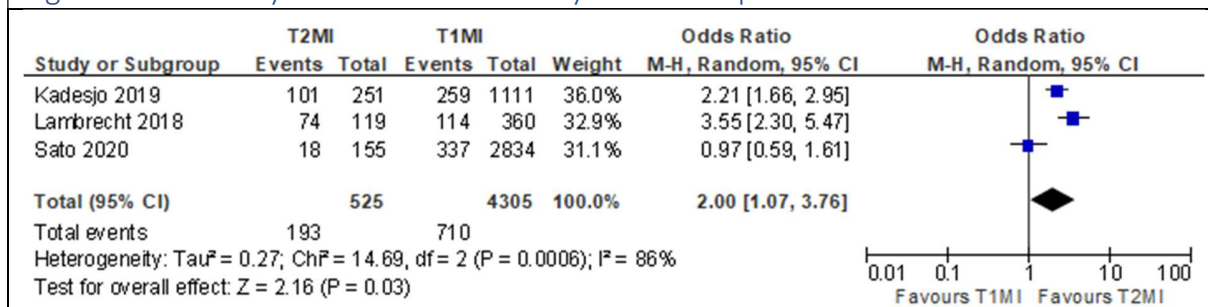

Figure S44. CVS In-hospital mortality. T2MI compared to T1MI.

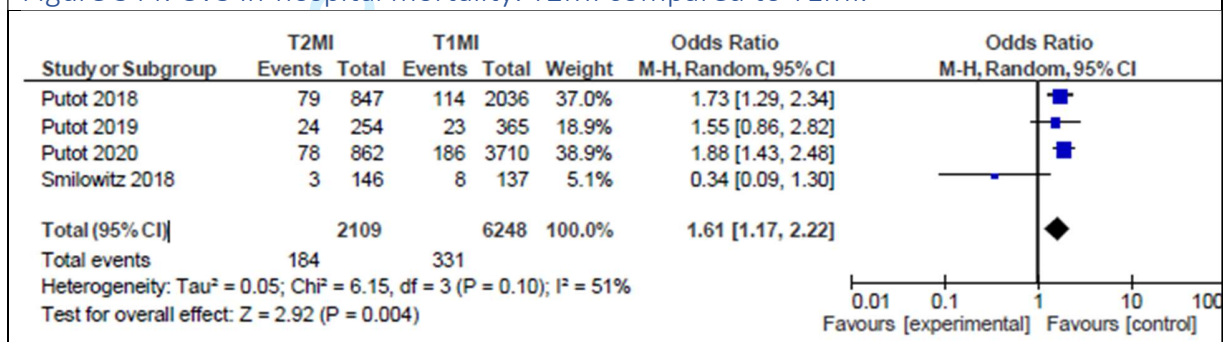

## References

1. Arora S, Strassle PD, Qamar A, Wheeler EN, Levine AL, Misenheimer JA, et al. Impact of Type 2 Myocardial Infarction (MI) on Hospital-Level MI Outcomes: Implications for Quality and Public Reporting. *Journal of the American Heart Association*. 2018;7(7).
2. Balanescu DV, Donisan T, Deswal A, Palaskas N, Song J, Lopez-Mattei J, et al. Acute myocardial infarction in a high-risk cancer population: Outcomes following conservative versus invasive management. *International journal of cardiology*. 2020;313:1-8.
3. Baron T, Hambraeus K, Sundström J, Erlinge D, Jernberg T, Lindahl B. Impact on Long-Term Mortality of Presence of Obstructive Coronary Artery Disease and Classification of Myocardial Infarction. *Am J Med*. 2016;129(4):398-406.
4. Bonaca MP, Wiviott SD, Braunwald E, Murphy SA, Ruff CT, Antman EM, et al. American College of Cardiology/American Heart Association/European Society of Cardiology/World Heart Federation universal definition of myocardial infarction classification system and the risk of cardiovascular death: observations from the TRITON-TIMI 38 trial (Trial to Assess Improvement in Therapeutic Outcomes by Optimizing Platelet Inhibition With Prasugrel-Thrombolysis in Myocardial Infarction 38). *Circulation*. 2012;125(4):577-83.
5. Cediel G, Gonzalez-Del-Hoyo M, Carrasquer A, Sanchez R, Boqué C, Bardají A. Outcomes with type 2 myocardial infarction compared with non-ischaemic myocardial injury. *Heart (British Cardiac Society)*. 2017;103(8):616-22.
6. Chapman AR, Shah ASV, Lee KK, Anand A, Francis O, Adamson P, et al. Long-Term Outcomes in Patients With Type 2 Myocardial Infarction and Myocardial Injury. *Circulation*. 2018;137(12):1236-45.
7. Chapman AR, Adamson PD, Shah ASV, Anand A, Strachan FE, Ferry AV, et al. High-Sensitivity Cardiac Troponin and the Universal Definition of Myocardial Infarction. *Circulation*. 2020;141(3):161-71.

- 1
- 2
- 3
- 4
- 5
- 6 8. Consuegra-Sánchez L, Martínez-Díaz JJ, de Guadiana-Romualdo LG, Wasniewski S, Esteban-Torrella P, Clavel-Ruipérez FG, et al. No additional value of conventional and high-sensitivity cardiac troponin over clinical scoring systems in the differential diagnosis of type 1 vs. type 2 myocardial infarction. *Clinical chemistry and laboratory medicine*. 2018;56(5):857-64.
- 7
- 8
- 9
- 10 9. El-Haddad H, Robinson E, Swett K, Wells GL. Prognostic implications of type 2 myocardial infarctions. 2012.
- 11
- 12 10. Etaher A, Gibbs OJ, Saad YM, Frost S, Nguyen TL, Ferguson I, et al. Type-II myocardial infarction and chronic myocardial injury rates, invasive management, and 4-year mortality among consecutive patients undergoing high-sensitivity troponin T testing in the emergency department. *European heart journal Quality of care & clinical outcomes*. 2020;6(1):41-8.
- 13
- 14 11. Furie N, Israel A, Gilad L, Neuman G, Assad F, Ben-Zvi I, et al. Type 2 myocardial infarction in general medical wards: Clinical features, treatment, and prognosis in comparison with type 1 myocardial infarction. *Medicine*. 2019;98(41):e17404.
- 15
- 16 12. Guimarães PO, Leonardi S, Huang Z, Wallentin L, de Werf FV, Aylward PE, et al. Clinical features and outcomes of patients with type 2 myocardial infarction: Insights from the Thrombin Receptor Antagonist for Clinical Event Reduction in Acute Coronary Syndrome (TRACER) trial. *Am Heart J*. 2018;196:28-35.
- 17
- 18 13. Hawatmeh A, Thawabi M, Aggarwal R, Abirami C, Vavilin I, Wasty N, et al. Implications of Misclassification of Type 2 Myocardial Infarction on Clinical Outcomes. *Cardiovascular revascularization medicine : including molecular interventions*. 2020;21(2):176-9.
- 19
- 20 14. Higuchi S, Suzuki M, Horiuchi Y, Tanaka H, Saji M, Yoshino H, et al. Higher non-cardiac mortality and lesser impact of early revascularization in patients with type 2 compared to type 1 acute myocardial infarction: results from the Tokyo CCU Network registry. *Heart Vessels*. 2019;34(7):1140-7.
- 21
- 22 15. Javed U, Aftab W, Ambrose JA, Wessel RJ, Mouanoutoua M, Huang G, et al. Frequency of elevated troponin I and diagnosis of acute myocardial infarction. *The American journal of cardiology*. 2009;104(1):9-13.
- 23
- 24 16. Kadesjö E, Roos A, Siddiqui A, Desta L, Lundbäck M, Holzmann MJ. Acute versus chronic myocardial injury and long-term outcomes. *Heart (British Cardiac Society)*. 2019;105(24):1905-12.
- 25
- 26 17. Lambrecht S, Sarkisian L, Saaby L, Poulsen TS, Gerke O, Hosbond S, et al. Different Causes of Death in Patients with Myocardial Infarction Type 1, Type 2, and Myocardial Injury. *Am J Med*. 2018;131(5):548-54.
- 27
- 28 18. Landes U, Bental T, Orvin K, Vaknin-Assa H, Rechavia E, Iakobishvili Z, et al. Type 2 myocardial infarction: A descriptive analysis and comparison with type 1 myocardial infarction. *Journal of cardiology*. 2016;67(1):51-6.
- 29
- 30 19. López-Cuenca A, Gómez-Molina M, Flores-Blanco PJ, Sánchez-Martínez M, García-Narbon A, De Las Heras-Gómez I, et al. Comparison between type-2 and type-1 myocardial infarction: clinical features, treatment strategies and outcomes. *J Geriatr Cardiol*. 2016;13(1):15-22.
- 31
- 32 20. Meigher S, Thode HC, Peacock WF, Bock JL, Gruberg L, Singer AJ. Causes of Elevated Cardiac Troponins in the Emergency Department and Their Associated Mortality. *Academic emergency medicine : official journal of the Society for Academic Emergency Medicine*. 2016;23(11):1267-73.
- 33
- 34 21. Nestelberger T, Boeddinghaus J, Badertscher P, Twerenbold R, Wildi K, Breitenbücher D, et al. Effect of Definition on Incidence and Prognosis of Type 2 Myocardial Infarction. *J Am Coll Cardiol*. 2017;70(13):1558-68.
- 35
- 36 22. Neumann JT, Sörensen NA, Rübsamen N, Ojeda F, Renné T, Qaderi V, et al. Discrimination of patients with type 2 myocardial infarction. *Eur Heart J*. 2017;38(47):3514-20.
- 37
- 38 23. Paiva L, Providência R, Barra S, Dinis P, Faustino AC, Gonçalves L. Universal definition of myocardial infarction: clinical insights. *Cardiology*. 2015;131(1):13-21.
- 39
- 40
- 41
- 42
- 43
- 44
- 45
- 46
- 47
- 48
- 49
- 50
- 51
- 52
- 53
- 54
- 55
- 56
- 57
- 58
- 59
- 60

- 1
- 2
- 3
- 4
- 5
- 6 24. Pandey AK, Duong T, Swiatkiewicz I, Daniels LB. A Comparison of Biomarker Rise in Type 1 and
- 7 Type 2 Myocardial Infarction. *The American journal of medicine*. 2020;133(10):1203-8.
- 8 25. Putot A, Derrida SB, Zeller M, Avondo A, Ray P, Manckoundia P, et al. Short-Term Prognosis of
- 9 Myocardial Injury, Type 1, and Type 2 Myocardial Infarction in the Emergency Unit. *Am J Med*.
- 10 2018;131(10):1209-19.
- 11 26. Putot A, Jeanmichel M, Chagué F, Avondo A, Ray P, Manckoundia P, et al. Type 1 or type 2
- 12 myocardial infarction in patients with a history of coronary artery disease: Data from the emergency
- 13 department. *Journal of Clinical Medicine*. 2019;8(12).
- 14 27. Putot A, Jeanmichel M, Chague F, Manckoundia P, Cottin Y, Zeller M. Type 2 Myocardial
- 15 Infarction: A Geriatric Population-based Model of Pathogenesis. *Aging and disease*. 2020;11(1):108-17.
- 16 28. Radovanovic D, Pilgrim T, Seifert B, Urban P, Pedrazzini G, Erne P. Type 2 myocardial infarction:
- 17 incidence, presentation, treatment and outcome in routine clinical practice. *Journal of cardiovascular*
- 18 *medicine (Hagerstown, Md)*. 2017;18(5):341-7.
- 19 29. Raphael CE, Roger VL, Sandoval Y, Singh M, Bell M, Lerman A, et al. Incidence, Trends, and
- 20 Outcomes of Type 2 Myocardial Infarction in a Community Cohort. *Circulation*. 2020;141(6):454-63.
- 21 30. Reed GW, Horr S, Young L, Clevenger J, Malik U, Ellis SG, et al. Associations Between Cardiac
- 22 Troponin, Mechanism of Myocardial Injury, and Long-Term Mortality After Noncardiac Vascular Surgery.
- 23 *Journal of the American Heart Association*. 2017;6(6).
- 24 31. Saaby L, Poulsen TS, Hosbond S, Larsen TB, Pyndt Diederichsen AC, Hallas J, et al. Classification
- 25 of myocardial infarction: frequency and features of type 2 myocardial infarction. *Am J Med*.
- 26 2013;126(9):789-97.
- 27 32. Saaby L, Poulsen TS, Diederichsen AC, Hosbond S, Larsen TB, Schmidt H, et al. Mortality rate in
- 28 type 2 myocardial infarction: observations from an unselected hospital cohort. *Am J Med*.
- 29 2014;127(4):295-302.
- 30 33. Sandoval Y, Thordsen SE, Smith SW, Schulz KM, Murakami MM, Pearce LA, et al. Cardiac
- 31 troponin changes to distinguish type 1 and type 2 myocardial infarction and 180-day mortality risk.
- 32 *European heart journal Acute cardiovascular care*. 2014;3(4):317-25.
- 33 34. Sandoval Y, Smith SW, Sexter A, Thordsen SE, Bruen CA, Carlson MD, et al. Type 1 and 2
- 34 Myocardial Infarction and Myocardial Injury: Clinical Transition to High-Sensitivity Cardiac Troponin I.
- 35 *Am J Med*. 2017;130(12):1431-9.e4.
- 36 35. Sato R, Sakamoto K, Kaikita K, Tsujita K, Nakao K, Ozaki Y, et al. Long-Term Prognosis of Patients
- 37 with Myocardial Infarction Type 1 and Type 2 with and without Involvement of Coronary Vasospasm.
- 38 *Journal of clinical medicine*. 2020;9(6).
- 39 36. Shah AS, McAllister DA, Mills R, Lee KK, Churchhouse AM, Fleming KM, et al. Sensitive troponin
- 40 assay and the classification of myocardial infarction. *Am J Med*. 2015;128(5):493-501.e3.
- 41 37. Singh A, Gupta A, DeFilippis EM, Qamar A, Biery DW, Almarzooq Z, et al. Cardiovascular
- 42 Mortality After Type 1 and Type 2 Myocardial Infarction in Young Adults. *Journal of the American*
- 43 *College of Cardiology*. 2020;75(9):1003-13.
- 44 38. Smilowitz NR, Subramanyam P, Gianos E, Reynolds HR, Shah B, Sedlis SP. Treatment and
- 45 outcomes of type 2 myocardial infarction and myocardial injury compared with type 1 myocardial
- 46 infarction. *Coronary artery disease*. 2018;29(1):46-52.
- 47 39. Stein GY, Herscovici G, Korenfeld R, Matetzky S, Gottlieb S, Alon D, et al. Type-II myocardial
- 48 infarction--patient characteristics, management and outcomes. *PLoS One*. 2014;9(1):e84285.
- 49 40. Truong HH, Victor MV, Imad MA, Kobalava ZD, Parvathy UT, Al-Zakwani I. Mortality and
- 50 morbidity associated with type 2 myocardial infarction: A single-center study. *Annals of Clinical*
- 51 *Cardiology*. 2020;2(2):70-9.
- 52
- 53
- 54
- 55
- 56
- 57
- 58
- 59
- 60

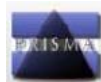

# PRISMA 2020 Checklist

1  
2  
3  
4  
5  
6  
7  
8  
9  
10  
11  
12  
13  
14  
15  
16  
17  
18  
19  
20  
21  
22  
23  
24  
25  
26  
27  
28  
29  
30  
31  
32  
33  
34  
35  
36  
37  
38  
39  
40  
41  
42  
43  
44  
45  
46  
47

| Section and Topic             | Item # | Checklist item                                                                                                                                                                                                                                                                                       | Location where item is reported |
|-------------------------------|--------|------------------------------------------------------------------------------------------------------------------------------------------------------------------------------------------------------------------------------------------------------------------------------------------------------|---------------------------------|
| <b>TITLE</b>                  |        |                                                                                                                                                                                                                                                                                                      |                                 |
| Title                         | 1      | Identify the report as a systematic review.                                                                                                                                                                                                                                                          | 1                               |
| <b>ABSTRACT</b>               |        |                                                                                                                                                                                                                                                                                                      |                                 |
| Abstract                      | 2      | See the PRISMA 2020 for Abstracts checklist.                                                                                                                                                                                                                                                         | 3                               |
| <b>INTRODUCTION</b>           |        |                                                                                                                                                                                                                                                                                                      |                                 |
| Rationale                     | 3      | Describe the rationale for the review in the context of existing knowledge.                                                                                                                                                                                                                          | 4                               |
| Objectives                    | 4      | Provide an explicit statement of the objective(s) or question(s) the review addresses.                                                                                                                                                                                                               | 4                               |
| <b>METHODS</b>                |        |                                                                                                                                                                                                                                                                                                      |                                 |
| Eligibility criteria          | 5      | Specify the inclusion and exclusion criteria for the review and how studies were grouped for the syntheses.                                                                                                                                                                                          | 4                               |
| Information sources           | 6      | Specify all databases, registers, websites, organisations, reference lists and other sources searched or consulted to identify studies. Specify the date when each source was last searched or consulted.                                                                                            | 4                               |
| Search strategy               | 7      | Present the full search strategies for all databases, registers and websites, including any filters and limits used.                                                                                                                                                                                 | Supp                            |
| Selection process             | 8      | Specify the methods used to decide whether a study met the inclusion criteria of the review, including how many reviewers screened each record and each report retrieved, whether they worked independently, and if applicable, details of automation tools used in the process.                     | 4                               |
| Data collection process       | 9      | Specify the methods used to collect data from reports, including how many reviewers collected data from each report, whether they worked independently, any processes for obtaining or confirming data from study investigators, and if applicable, details of automation tools used in the process. | 4                               |
| Data items                    | 10a    | List and define all outcomes for which data were sought. Specify whether all results that were compatible with each outcome domain in each study were sought (e.g. for all measures, time points, analyses), and if not, the methods used to decide which results to collect.                        | 4                               |
|                               | 10b    | List and define all other variables for which data were sought (e.g. participant and intervention characteristics, funding sources). Describe any assumptions made about any missing or unclear information.                                                                                         | 4                               |
| Study risk of bias assessment | 11     | Specify the methods used to assess risk of bias in the included studies, including details of the tool(s) used, how many reviewers assessed each study and whether they worked independently, and if applicable, details of automation tools used in the process.                                    | 5                               |
| Effect measures               | 12     | Specify for each outcome the effect measure(s) (e.g. risk ratio, mean difference) used in the synthesis or presentation of results.                                                                                                                                                                  | 5                               |
| Synthesis methods             | 13a    | Describe the processes used to decide which studies were eligible for each synthesis (e.g. tabulating the study intervention characteristics and comparing against the planned groups for each synthesis (item #5)).                                                                                 | 5                               |
|                               | 13b    | Describe any methods required to prepare the data for presentation or synthesis, such as handling of missing summary statistics, or data conversions.                                                                                                                                                | 5                               |
|                               | 13c    | Describe any methods used to tabulate or visually display results of individual studies and syntheses.                                                                                                                                                                                               | 5                               |
|                               | 13d    | Describe any methods used to synthesize results and provide a rationale for the choice(s). If meta-analysis was performed, describe the model(s), method(s) to identify the presence and extent of statistical heterogeneity, and software package(s) used.                                          | 5                               |
|                               | 13e    | Describe any methods used to explore possible causes of heterogeneity among study results (e.g. subgroup analysis, meta-regression).                                                                                                                                                                 | 5                               |
|                               | 13f    | Describe any sensitivity analyses conducted to assess robustness of the synthesized results.                                                                                                                                                                                                         | N/A                             |
| Reporting bias assessment     | 14     | Describe any methods used to assess risk of bias due to missing results in a synthesis (arising from reporting biases).                                                                                                                                                                              | 5                               |
| Certainty                     | 15     | Describe any methods used to assess certainty (or confidence) in the body of evidence for an outcome.                                                                                                                                                                                                | N/A                             |

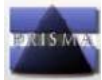

## PRISMA 2020 Checklist

1  
2  
3  
4  
5  
6  
7  
8  
9  
10  
11  
12  
13  
14  
15  
16  
17  
18  
19  
20  
21  
22  
23  
24  
25  
26  
27  
28  
29  
30  
31  
32  
33  
34  
35  
36  
37  
38  
39  
40  
41  
42  
43  
44  
45  
46  
47

| Section and Topic                              | Item # | Checklist item                                                                                                                                                                                                                                                                       | Location where item is reported |
|------------------------------------------------|--------|--------------------------------------------------------------------------------------------------------------------------------------------------------------------------------------------------------------------------------------------------------------------------------------|---------------------------------|
| assessment                                     |        |                                                                                                                                                                                                                                                                                      |                                 |
| <b>RESULTS</b>                                 |        |                                                                                                                                                                                                                                                                                      |                                 |
| Study selection                                | 16a    | Describe the results of the search and selection process, from the number of records identified in the search to the number of studies included in the review, ideally using a flow diagram.                                                                                         | 5                               |
|                                                | 16b    | Cite studies that might appear to meet the inclusion criteria, but which were excluded, and explain why they were excluded.                                                                                                                                                          | 5                               |
| Study characteristics                          | 17     | Cite each included study and present its characteristics.                                                                                                                                                                                                                            | Supp                            |
| Risk of bias in studies                        | 18     | Present assessments of risk of bias for each included study.                                                                                                                                                                                                                         | Supp                            |
| Results of individual studies                  | 19     | For all outcomes, present, for each study: (a) summary statistics for each group (where appropriate) and (b) an effect estimate and its precision (e.g. confidence/credible interval), ideally using structured tables or plots.                                                     | Supp                            |
| Results of syntheses                           | 20a    | For each synthesis, briefly summarise the characteristics and risk of bias among contributing studies.                                                                                                                                                                               | Supp                            |
|                                                | 20b    | Present results of all statistical syntheses conducted. If meta-analysis was done, present for each the summary estimate and its precision (e.g. confidence/credible interval) and measures of statistical heterogeneity. If comparing groups, describe the direction of the effect. | Supp                            |
|                                                | 20c    | Present results of all investigations of possible causes of heterogeneity among study results.                                                                                                                                                                                       | Supp                            |
|                                                | 20d    | Present results of all sensitivity analyses conducted to assess the robustness of the synthesized results.                                                                                                                                                                           | N/A                             |
| Reporting biases                               | 21     | Present assessments of risk of bias due to missing results (arising from reporting biases) for each synthesis assessed.                                                                                                                                                              | N/A                             |
| Certainty of evidence                          | 22     | Present assessments of certainty (or confidence) in the body of evidence for each outcome assessed.                                                                                                                                                                                  | N/A                             |
| <b>DISCUSSION</b>                              |        |                                                                                                                                                                                                                                                                                      |                                 |
| Discussion                                     | 23a    | Provide a general interpretation of the results in the context of other evidence.                                                                                                                                                                                                    | 7                               |
|                                                | 23b    | Discuss any limitations of the evidence included in the review.                                                                                                                                                                                                                      | 9                               |
|                                                | 23c    | Discuss any limitations of the review processes used.                                                                                                                                                                                                                                | 9                               |
|                                                | 23d    | Discuss implications of the results for practice, policy, and future research.                                                                                                                                                                                                       | 9                               |
| <b>OTHER INFORMATION</b>                       |        |                                                                                                                                                                                                                                                                                      |                                 |
| Registration and protocol                      | 24a    | Provide registration information for the review, including register name and registration number, or state that the review was not registered.                                                                                                                                       | 4                               |
|                                                | 24b    | Indicate where the review protocol can be accessed, or state that a protocol was not prepared.                                                                                                                                                                                       | 4                               |
|                                                | 24c    | Describe and explain any amendments to information provided at registration or in the protocol.                                                                                                                                                                                      | N/A                             |
| Support                                        | 25     | Describe sources of financial or non-financial support for the review, and the role of the funders or sponsors in the review.                                                                                                                                                        | N/A                             |
| Competing interests                            | 26     | Declare any competing interests of review authors.                                                                                                                                                                                                                                   | N/A                             |
| Availability of data, code and other materials | 27     | Report which of the following are publicly available and where they can be found: template data collection forms; data extracted from included studies; data used for all analyses; analytic code; any other materials used in the review.                                           | N/A                             |

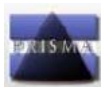

## PRISMA 2020 Checklist

- 1
- 2
- 3
- 4
- 5
- 6
- 7
- 8
- 9
- 10
- 11
- 12
- 13
- 14
- 15
- 16
- 17
- 18
- 19
- 20
- 21
- 22
- 23
- 24
- 25
- 26
- 27
- 28
- 29
- 30
- 31
- 32
- 33
- 34
- 35
- 36
- 37
- 38
- 39
- 40
- 41
- 42
- 43
- 44
- 45
- 46
- 47

10.1136/bmj.n71

For more information, visit: <http://www.prisma-statement.org/>

For peer review only

# BMJ Open

## Diagnostic features, management, and prognosis of Type 2 myocardial infarction compared to Type 1 myocardial infarction: A systematic review and meta-analysis.

|                                 |                                                                                                                                                                                                                                                                                                                              |
|---------------------------------|------------------------------------------------------------------------------------------------------------------------------------------------------------------------------------------------------------------------------------------------------------------------------------------------------------------------------|
| Journal:                        | <i>BMJ Open</i>                                                                                                                                                                                                                                                                                                              |
| Manuscript ID                   | bmjopen-2021-055755.R3                                                                                                                                                                                                                                                                                                       |
| Article Type:                   | Original research                                                                                                                                                                                                                                                                                                            |
| Date Submitted by the Author:   | 17-Jan-2022                                                                                                                                                                                                                                                                                                                  |
| Complete List of Authors:       | White, Kyle; Princess Alexandra Hospital; University of Queensland Kinarivala, Mansey; Princess Alexandra Hospital, Internal Medicine and Clinical Epidemiology<br>Scott, Ian; University of Queensland, School of Clinical Medicine; Princess Alexandra Hospital, Department of Internal Medicine and Clinical Epidemiology |
| <b>Primary Subject Heading</b>: | Cardiovascular medicine                                                                                                                                                                                                                                                                                                      |
| Secondary Subject Heading:      | Cardiovascular medicine, Diagnostics                                                                                                                                                                                                                                                                                         |
| Keywords:                       | Coronary heart disease < CARDIOLOGY, Ischaemic heart disease < CARDIOLOGY, Myocardial infarction < CARDIOLOGY                                                                                                                                                                                                                |
|                                 |                                                                                                                                                                                                                                                                                                                              |

SCHOLARONE™  
Manuscripts



I, the Submitting Author has the right to grant and does grant on behalf of all authors of the Work (as defined in the below author licence), an exclusive licence and/or a non-exclusive licence for contributions from authors who are: i) UK Crown employees; ii) where BMJ has agreed a CC-BY licence shall apply, and/or iii) in accordance with the terms applicable for US Federal Government officers or employees acting as part of their official duties; on a worldwide, perpetual, irrevocable, royalty-free basis to BMJ Publishing Group Ltd ("BMJ") its licensees and where the relevant Journal is co-owned by BMJ to the co-owners of the Journal, to publish the Work in this journal and any other BMJ products and to exploit all rights, as set out in our [licence](#).

The Submitting Author accepts and understands that any supply made under these terms is made by BMJ to the Submitting Author unless you are acting as an employee on behalf of your employer or a postgraduate student of an affiliated institution which is paying any applicable article publishing charge ("APC") for Open Access articles. Where the Submitting Author wishes to make the Work available on an Open Access basis (and intends to pay the relevant APC), the terms of reuse of such Open Access shall be governed by a Creative Commons licence – details of these licences and which [Creative Commons](#) licence will apply to this Work are set out in our licence referred to above.

Other than as permitted in any relevant BMJ Author's Self Archiving Policies, I confirm this Work has not been accepted for publication elsewhere, is not being considered for publication elsewhere and does not duplicate material already published. I confirm all authors consent to publication of this Work and authorise the granting of this licence.



## Title Page

### Manuscript Title

Diagnostic features, management, and prognosis of Type 2 myocardial infarction compared to Type 1 myocardial infarction: A systematic review and meta-analysis.

### Authors

Dr Kyle White

Princess Alexandra Hospital, Brisbane, Australia

University of Queensland, Brisbane, Australia

BSc, MBBS, FRACP, FCICM, MPH

Dr Mansey Kinarivala

Princess Alexandra Hospital, Brisbane, Australia

MBBS, FRACP

Prof Ian Scott

Princess Alexandra Hospital, Brisbane, Australia

University of Queensland, Brisbane, Australia

MEd, MHA, MBBS, FRACP

### Corresponding Author

Dr Kyle White

Princess Alexandra Hospital

199 Ipswich Road, Wolloongabba, 4102

Ph: +61731762111

Email: [kyle.white@health.qld.gov.au](mailto:kyle.white@health.qld.gov.au)

### Manuscript Word Count

3738

## Abstract

### Importance

Distinguishing type 2 (T2MI) from type 1 myocardial infarction (T1MI) in clinical practice can be difficult, and the management and prognosis for T2MI remain uncertain.

### Objective

To compare precipitating factors, risk factors, investigations, management, and outcomes for T2MI and T1MI.

### Data Sources

MEDLINE and EMBASE databases as well as reference list of recent articles were searched January 2009 to December 2020 for term “type 2 myocardial infarction”.

### Study Selection

Studies were included if they analysed if universal definition of MI was used and reported quantitative data on at least one variable of interest.

### Data Extraction and Synthesis

Data was pooled using random-effect meta-analysis. Risk of bias was assessed using Newcastle-Ottawa Quality Assessment Form. Preferred Reporting Items for Systematic Reviews and Meta-analyses (PRISMA) guidelines were followed. All review stages were conducted by two reviewers.

### Main Outcomes and Measures

Risk factors, presenting symptoms, cardiac investigations such as troponin and angiogram, management, and outcomes such as mortality.

### Results

40 cohort studies comprising 98,930 T1MI and 13,803 T2MI patients were included. Compared to T1MI, T2MI patients were: more likely to have pre-existing chronic kidney (OR 1.87; 95%CI 1.53-2.28) and chronic heart failure (OR 2.35; 95%CI 1.82-3.03), less likely to present with typical cardiac symptoms of chest pain (OR 0.19; 95%CI 0.13-0.26) and more likely to present with dyspnoea (OR 2.64; 95%CI 1.86-3.74); more likely to demonstrate non-specific ST-T wave changes on electrocardiography (OR 2.62; 95%CI 1.81-3.79) and less likely to show ST elevation (OR 0.22; 95%CI 0.17-0.28); less likely to undergo coronary angiography (OR 0.09; 95%CI 0.06-0.12) and percutaneous coronary intervention (OR 0.09; 95%CI 0.06-0.12) or receive cardioprotective medications, such as statins (OR 0.25; 95%CI 0.16-0.38) and beta-blockers (OR 0.45; 95%CI 0.33-0.63). T2MI had more risk of all cause one-year mortality (OR 3.11; 95%CI 1.91-5.08), with no differences in short-term mortality (OR 1.34; 95%CI 0.63-2.85).

### Conclusion and Relevance

This review has identified clinical, management and survival differences between T2MI and T1MI with greater precision and scope than previously reported. Differential use of coronary

1  
2  
3 revascularisation and cardioprotective medications highlight ongoing uncertainty of their utility in  
4 T2MI compared to T1MI.  
5  
6  
7  
8  
9  
10  
11  
12

## 13 Strength and Limitations

- 14 • Inclusion of all contemporary cohort studies in the troponin era
  - 15 • Large patient population of T2MI and T1MI patients analysed allowing high level of precision
  - 16 • Wide array of clinically significant variables assessed providing a comprehensive analysis
  - 17 • Analysis of crude mortality only was possible due to lack of individual patient data
- 18  
19  
20  
21  
22  
23  
24  
25  
26  
27  
28  
29  
30  
31  
32  
33  
34  
35  
36  
37  
38  
39  
40  
41  
42  
43  
44  
45  
46  
47  
48  
49  
50  
51  
52  
53  
54  
55  
56  
57  
58  
59  
60

## Introduction

The clinical definition of myocardial infarction has evolved over time. The 2007 Universal Definition of Myocardial Infarction included a subset of MI that was secondary to aetiologies unrelated to underlying occlusive coronary artery disease (1). In 2012, the Third Universal Definition of Myocardial Infarction Consensus Document (2) gave rise to the aetiological distinction between T1MI, defined as MI due to plaque erosion and/or rupture, and T2MI, defined as MI caused by increased oxygen demand or decreased blood supply, in the absence of acute plaque rupture or coronary thrombosis. More recently, in 2018, the Fourth Universal definition of MI updated concepts of T2MI regarding specific situations associated with oxygen demand and supply imbalance and the relevance of the presence or absence of underlying coronary artery disease to therapy and prognosis (3). (see on-line supplement Table S1 for more detail)

In clinical practice, distinguishing T2MI from T1MI based on clinical presentation, electrocardiograph (ECG) features and cardiac troponin (cTn) values can be difficult. In the absence of randomised controlled trials that have evaluated different investigational and therapeutic interventions in patients with T2MI, uncertainty remains around the appropriate management of such patients, particularly those with known or suspected coronary artery disease. Past reviews have assessed one or more attributes of T2MI in comparison to T1MI (4-8) but, to our knowledge, none have undertaken a comprehensive analysis of symptoms, physical signs, investigation results, management regimens and clinical outcomes, both short and long term, of T2MI versus T1MI.

We undertook a systematic review of observational studies with the aims of identifying diagnostic and investigational findings which can assist clinicians to better distinguish T2MI from T1MI, and compare T2MI with T1MI in defining differences in management strategies and clinical outcomes.

## Methods

### Study design

The review was undertaken in accordance with recommendations of the Cochrane Collaboration and Preferred Reporting Items for Systematic Reviews and Meta-Analyses (PRISMA) statement (9). Our review was registered on PROSPERO prior to commencement (Registration number: CRD42021237746). MEDLINE and EMBASE databases were searched for all studies published between January 1st, 2009, and December 31st, 2020, using search terms to identify all studies related to T2MI (see Table S2). Reference lists of all relevant articles were also assessed to identify additional relevant studies. The study PRISMA flowchart is shown in Figure S1. January 2009 was chosen as the start date for the literature search in order to restrict our analyses to contemporary studies in the troponin era that employed formal definitions of T2MI which were only devised from 2007 onwards.

Studies were included if they: 1) compared patient populations with T2MI and T1MI, 2) used a universal definition of MI, 3) included at least one variable of interest, 4) were available as full text in English and 5) were either a randomised control trial or comparative observational study. Studies were excluded if: 1) no full text was available, 2) duplicate data was utilised or 3) less than 200 participants in total were included. Initial screening of titles and abstracts for eligible studies was

1  
2  
3 performed independently by two authors (MK, KW), as was full text review for inclusion, with any  
4 differences in review settled by consensus agreement.  
5

## 6 7 Data collection and synthesis

8 Data pertaining to all variables of interest were collected from all included studies using a  
9 standardised proforma by one author (MK) and independently reviewed by the second author (KW).  
10 These variables comprised: study dates, design, sample size, definition used to define T2MI and  
11 T1MI, patient demographics, pre-existing medical conditions, precipitating factors, clinical  
12 symptoms, ECG findings, laboratory values, echocardiographic results, any clinical interventions or  
13 medical treatments administered, and clinical outcomes observed.  
14  
15

16  
17 Data on variables reported as, or able to be converted to, raw numbers, were pooled from all studies  
18 and subject to comparative meta-analysis using Review Manager (RevMan, Computer program.  
19 Version 5.3. Copenhagen: The Nordic Cochrane Centre, The Cochrane Collaboration, 2014). For each  
20 variable, the odds ratio (OR) comparing T2MI to T1MI, and its 95% confidence interval (CI), was  
21 calculated and weighted using the random effects method. As specified in the registered study  
22 protocol, the random effects method was used in anticipation of study heterogeneity of at least  
23 moderate degree ( $I^2$  statistic of heterogeneity  $>50\%$ ) (10). In addition to the weighted OR, we also  
24 report the crude total event rates for each variable subject to meta-analysis in order to provide a  
25 more clinically meaningful estimate of the prevalence of these events in each patient group in view  
26 of the large sample sizes. Studies reporting mean or median values only were reproduced as  
27 reported in the original study.  
28  
29

30  
31 Risk of bias within each study was assessed using the Newcastle-Ottawa quality assessment tool for  
32 cohort studies (11, 12), with scores 7-8 denoting good quality studies, 4-6 fair quality, and 0-3 poor  
33 quality. Publication bias was assessed using funnel plots.  
34  
35

## 36 37 Patient and Public Involvement

38 We did not seek patient or public comment in designing the study.  
39  
40

## 41 42 Results

43 A total of 40 studies were included for analysis (13-52) and their characteristics are summarised in  
44 Table S3. They comprised a total of 127,620 participants of whom 98,930 participants (77.5%) were  
45 classified as T1MI and 13,803 (10.8%) as T2MI. In the following text, we report key findings; more  
46 information and forest plots for each analysis involving more than one study and more than 100  
47 total cases can be found in the on-line supplement, Figures S2-S44.  
48  
49

50 The 2007 definition (1) was used in 7 (17.5%) studies (15, 16, 27, 29, 43, 44, 51, 52), the 2012  
51 definition (2) in 25 (62.5%) studies (13, 17, 19-21, 23-26, 30-35, 37, 39, 40, 42, 45-48, 50, 51), and  
52 the 2018 definition (3) in 8 (20%) studies (14, 18, 22, 28, 36, 38, 41, 49). Of the 40 studies, 17 (42.5%)  
53 were prospective (15, 16, 18, 19, 22, 29, 33, 34, 36, 37, 43, 44, 46-48, 50, 52) and 23 (57.5%) were  
54 retrospective (13, 14, 17, 20, 21, 23-28, 30-32, 35, 38-42, 46, 49, 52).  
55  
56

## 57 58 Risk of bias assessment

59  
60

1  
2  
3 Of the 40 studies, 31 (77.5%) were assessed as good quality (13, 15-19, 22, 23, 27-35, 37-46, 48, 50-  
4 52), 6 (15%) as fair quality (14, 24-26, 49), and 3 (7.5%) as poor quality (20, 36, 47), as summarised  
5 in Table S4. Selection bias resulting in unrepresentative cohorts such as admission criteria to  
6 coronary care units or entry criteria into MI registries favouring T1MI (14, 20, 24-26, 36, 47, 49),  
7 absence of independent adjudication of MI type as T1MI or T2MI (36, 38, 47), non-comparability of  
8 T1MI and T2MI cohorts (20, 24, 25, 47), poorly specified outcome measures (36, 38, 47) and short  
9 follow-up period resulting in few events (14, 20, 24, 36) comprised most forms of bias.

10  
11  
12  
13 Funnel plots for in-hospital and 1-year all-cause mortality showed no asymmetry (on-line  
14 supplement, Figures S45, S46). Funnel plots for all other analyses showed similar results (available  
15 on request).

## 16 17 18 Participant characteristics

19 Patients with T1MI had a median age range of 60-82 years in the included studies that did not select  
20 a specific age population, compared to a median age range of 62-81 years in patients with T2MI. The  
21 sex distribution was also similar, with 58.4% and 53% of patients with T1MI and T2MI being male  
22 respectively.  
23

24  
25 Regarding pre-existing medical conditions (Table 1), T2MI patients compared to T1MI patients were  
26 more likely to have chronic kidney disease (22.8% vs 17.3%; OR 1.87; 95%CI 1.53-2.28), chronic heart  
27 failure (13.1% vs 7.6%; OR 2.35; 95%CI 1.82-3.03), atrial fibrillation (22.9% vs 6.1%; OR 3.02; 95%CI  
28 2.29-3.99), and hypertension (66.4% vs 63.4%; OR 1.22; 95%CI 1.03-1.45). Patients with T2MI were  
29 less likely to have dyslipidaemia (43.4% vs 45.9%; OR 0.74; 95%CI 0.58-0.94) and smoking history  
30 (34.7% vs 52.8%; OR 0.6; 95%CI 0.49-0.73). There was no difference in the prevalence of type 2  
31 diabetes mellitus or ischaemic heart disease between the two groups.  
32  
33

## 34 35 36 Precipitating factors

37 Less than half of the studies (n=17; 43%) included data on precipitating factors associated with T2MI  
38 (13, 15, 17, 19, 21-24, 27, 31, 32, 35, 40, 44, 45, 50, 51, 52). Data on each precipitating factor was  
39 not consistently available across the studies, for example only 17 studies representing 45% of T2MI  
40 patients assessed presence of arrhythmia  
41

42  
43 The most common precipitants were sepsis (35.9%) and heart failure (35.9%, followed by arrhythmia  
44 (29.8%) (Table S5), with non-cardiac surgery being deemed a cause in 12.2% of cases where data for  
45 this variable were collected.  
46  
47

## 48 49 50 Presenting clinical features

51 As summarised in Table S6, compared to T1MI patients, T2MI patients were less likely to present  
52 with typical cardiac symptoms of chest pain (58.6% vs 88.4%; OR 0.19; 95%CI 0.13-0.26) or  
53 discomfort in the arm or shoulder (8.5% vs 35%; OR 0.18; 95%CI 0.11-0.3), but more likely to present  
54 with dyspnoea (27.1% vs 10.6%; OR 2.64; 95%CI 1.86-3.74).  
55

## 56 57 58 Investigations

59 ECG findings on presentation (Table S7) such as ST elevation (14.1% vs 44.2%; OR 0.22; 95%CI 0.17-  
60 0.28) and pathological Q waves (6.7% vs 20.8%; OR 0.38; 95%CI 0.20-0.71) were less evident in T2MI

1  
2  
3 than in T1MI. In contrast, non-specific ST-T wave changes (24.7% vs 10.8%; OR 2.62; 95%CI 1.81-  
4 3.79), and atrial arrhythmias (21% vs 6.6%; OR 4.99; 95%CI 3.14-7.93) were more common among  
5 T2MI. No differences between groups were seen in the frequency of ST depression or T wave  
6 inversion.  
7

8  
9 Among the 40 studies, four studies (10%) reported the use of high-sensitivity cardiac troponin (cTn)  
10 assays, 21 (53%) reported sensitive assays, and 14 (35%) did not specify what generation assay was  
11 used (Table S3b). The results of troponin assays were reported in 26 (65%) studies, specific to cTnI  
12 assays in 19 studies, cTnT in 5, both assays in one, while another did not specify the assay used. Only  
13 two of these studies reporting troponin failed to state the upper limit of normal (ULN) of the assay  
14 used (23, 31). The troponin assays, and therefore units and reference ranges, varied between the  
15 studies, preventing direct comparison of troponin values. As a result, we converted troponin values  
16 to a multiple of the upper limit of normal for each assay to allow direct comparison (Table S8). For  
17 peak troponin, patients with T1MI had a higher and wider range of between 5 and 1702 times the  
18 ULN compared to patients with T2MI with a range of 2.8-447 times the ULN. Studies yielded mixed  
19 results as to whether the magnitude of change (or delta) in serial cardiac troponin assays was more  
20 predictive of T2MI or T1MI compared to absolute values of peak levels (33). Lowering the diagnostic  
21 threshold for troponin with the advent of more sensitive assays has increased the numbers of  
22 patients identified with T2MI by up to 50% (36), with more recent studies showing the incidence of  
23 T2MI equalling or exceeding that of T1MI (15, 33, 36).  
24  
25

26 Echocardiography was less frequently performed among T2MI than T1MI patients (47.9% vs 55.5%;  
27 OR 0.44; 95%CI 0.20-0.96) and when reported (Table S7), there was no difference in the prevalence  
28 of regional wall motion abnormalities or the level of left ventricular (LV) function, with reported  
29 median LV ejection fraction being 42.3%-55% in T1MI patients and 40%-56% in T2MI patients.  
30

31 Coronary angiography was also less frequently performed among T2MI than in T1MI patients (34.1%  
32 vs 85.5%; OR 0.09; 95%CI 0.06-0.12, Table S7). When performed, T2MI patients were less likely to  
33 demonstrate obstructive coronary artery disease (34% vs 44.9%; OR 0.16; 95%CI 0.05-0.54), with  
34 obstruction variously defined as 50%-70% occlusion of one or more vessels.  
35

## 36 Management

37 T2MI patients, compared to T1MI patients, were significantly less likely to receive conventional  
38 cardioprotective medications (Table 2), comprising beta-blockers (58.3% vs 76.3%; OR 0.45; 95%CI  
39 0.33-0.63), anti-platelet agents (70.8% vs 88.5%; OR 0.24; 95%CI 0.16-0.38) and statins (52.9% vs  
40 87.6%; OR 0.25; 95%CI 0.16-0.38). Of note, T2MI patients were more likely to receive diuretics  
41 (44.8% vs 13.6%; OR 1.98; 95%CI 1.37-2.86) or anti-coagulants (28.9% vs 25.2%; OR 1.87; 95%CI  
42 1.06-3.30).  
43

44 Percutaneous coronary intervention (PCI) (21.1% vs 78%; OR 0.06; 95%CI 0.04-0.10) and coronary  
45 artery bypass surgery (2.9% vs 6.4%; OR 0.23; 95%CI 0.12-0.45) were also significantly less likely to  
46 be performed in T2MI patients than T1MI patients.  
47

## 48 Prognosis

49 T2MI patients had significantly increased risk of all-cause death compared to patients with T1MI in  
50 both short- and long-term follow-up (Table 3). Specifically, compared to T1MI patients, T2MI  
51

demonstrated increased all-cause mortality in-hospital (12.5% vs 5.8%; OR 1.94; 95%CI 1.35-2.79, Figure S40), at one-year (18.9% vs 5.4%; OR 3.11; 95%CI 1.91-5.08, Figure 1) and at 5 to 10 years, (53.7% vs 28.5%, OR 3.24; 95%CI 2.73-3.84, Figure 2). In contrast, there were no differences between T2MI and T1MI patients in the risk of short-term mortality at 120-180 days (23.0% vs 12.5%; OR 1.34; 95%CI 0.63-2.85).

## Discussion

To our knowledge, this is the most comprehensive systematic review and meta-analysis of contemporary studies comparing T2MI with T1MI in the troponin era, comprising 127,620 patients from 40 cohort studies across 14 countries, and which used formal definitions of T2MI and T1MI. Up to three quarters of all myocardial infarctions in routine care can be T2MI (33, 34), and distinguishing T2MI from T1MI on clinical criteria is often challenging. The management strategies used by clinicians in real-world practice for T2MI often vary, and the clinical outcomes of T2MI compared to T1MI, particularly over the long term, have been uncertain. This review provides information that helps characterise these two groups of patients according to multiple variables and which may assist in clinical decision-making and prognostication.

In this review, T2MI patients demonstrated more medical comorbidities than T1MI patients, as noted in a recent meta-analysis (6). Our review highlighted the much higher incidence of pre-existing generalised vascular disease, atrial fibrillation, renal impairment, and heart failure among T2MI patients.

Sepsis (10, 16, 27) and anaemia (51) ranked highly as triggers, together with other acute cardiac events such as valve dysfunction or arrhythmias. In one study, a more favourable prognosis in T2MI was seen when the principal trigger was arrhythmia compared to non-cardiac surgery, hypotension, anaemia or hypoxia (29). In another study, shock syndromes were triggers portending a worse prognosis compared to all other triggers (32). In our analysis, non-cardiac surgery as a trigger was less frequent than reported by other investigators (26) whereby peri-operative stressors including blood loss, anaesthesia induced hypotension and wound infections cause imbalance in myocardial contractility, oxygen demand and blood flow (53).

Analysis of cTn levels showed uniformly higher values in T1MI than T2MI which accord with one review (5) reporting cTn values 30% to 94% higher in patients with T1MI, and which other investigators regard as being highly specific diagnostic markers for T1MI (53).

Coronary angiography and revascularisation were both performed much less frequently in T2MI than in T1MI patients. Treating physicians may perceive invasive strategies as being contraindicated or potentially harmful in the presence of various co-morbidities more commonly seen in T2MI and associated with competing mortality risk. In our pooled data, only one in three T2MI patients who underwent angiography demonstrated obstructive coronary artery disease, although this figure may be an underestimate due to selection bias whereby younger, less multi-morbid patients preferentially underwent angiography. In the CASABLANCA cohort study, which enrolled patients with high likelihood of coronary or peripheral artery disease and subjected them to peripheral or coronary angiography, of all those who subsequently suffered incident T2MI, almost half (47.7%) demonstrated  $\geq 70\%$  stenosis in at least 2 major coronary arteries (54). These conflicting findings



1  
2  
3 question whether patients presenting with T2MI would benefit from routine use of invasive  
4 strategies that define coronary anatomy and, if plaque rupture or critical stenoses are seen, prompt  
5 revascularisation, with resultant improvement in patient outcomes. In one study (18), angiography  
6 unmasked acute plaque rupture in 29% of patients classified as T2MI. In another study, among 27 of  
7 236 patients with T2MI who underwent revascularisation, the odds of all-cause death were reduced  
8 by 67% compared to the remaining 209 non-revascularised patients (23). In contrast, in a third more  
9 rigorous study comparing T2MI versus T1MI patients who received or did not receive PCI within 24  
10 hours of symptom onset, after adjusting results using multivariate logistic regression analysis and  
11 inverted probability weighting (15), in-hospital mortality was lower in those with T1MI receiving PCI  
12 (OR 0.47; 95% CI 0.40–0.55;  $p < 0.001$ ), but not in those with T2MI receiving PCI (OR 1.09; 95% CI  
13 0.62–1.94;  $p = 0.763$ ). However, all these studies are observational, so completion of randomised  
14 trials, such as the Appropriateness of Coronary investigation in myocardial injury and Type 2  
15 myocardial infarction (ACT-2) trial, which is currently in recruitment (55), will hopefully provide a  
16 more definitive answer.  
17  
18  
19  
20  
21

22  
23 Given that a third of T2MI patients had pre-existing coronary artery disease and most of the  
24 remainder had one or more cardiovascular risk factors, the relative underuse of cardioprotective  
25 medications is perplexing. It may reflect either clinician uncertainty around their cardioprotective  
26 utility in T2MI, or concerns about the potential for adverse interactions with other drugs or diseases  
27 commonly seen in multi-morbid T2MI patients. The higher use of diuretics in the T2MI population  
28 likely reflects the higher prevalence of heart failure and hypertension. Recognizing the  
29 heterogeneous mechanisms or conditions leading to T2MI, a phenotype specific-approach to the  
30 design of future trials will be useful in identifying effective therapies.  
31  
32

33  
34 An important finding is the much higher all-cause in-hospital and one-year mortality in T2MI  
35 compared to T1MI patients, similar to the two-fold greater mortality rate in T2MI noted in a recent  
36 systematic review of 9 studies (8). In our review, this excess mortality was not driven by an excess of  
37 cardiovascular deaths, and likely reflects the competing risks of multiple co-morbidities, rather than  
38 underlying obstructive coronary artery disease which was seen in 30-50% of T2MI patients (26, 31).  
39 Studies yielded mixed results as to whether coronary artery disease is an independent predictor of  
40 T2MI (20, 42), while others question the angiographic distinction between T2MI and T1MI. For  
41 example, in a study of 450 consecutive patients with MI who all underwent coronary angiography  
42 within 24 hours of symptom onset, 145 (32.2%) patients had 'true' T1MI (acute atherothrombosis  
43 and no systemic triggers), 114 (25.3%) had 'true' T2MI (no atherothrombosis and systemic triggers),  
44 61 (13.6%) patients had neither, and 130 (28.9%) patients had both (41). This yields a discordance of  
45 angiographic and clinical definitions of MI type in 42.5% of patients.  
46  
47  
48  
49

50  
51 Our review has several limitations. First, in the absence of individual patient data from all included  
52 studies, we could not perform multivariate regression analysis in identifying independent predictors  
53 of diagnosis, management, or prognosis of T2MI. Second, we did not perform separate analyses of  
54 studies according to each version of the Universal Definition of MI or to different troponin  
55 thresholds to define MI, which may impact management and prognosis. However, potential  
56 misclassification bias was addressed in a recent study which showed little change in MI classification  
57 as type 1 or 2 in the same cohort of emergency admissions to whom the 3<sup>rd</sup> and 4<sup>th</sup> universal  
58 definitions were applied (56). In another study which compared separate T2MI cohorts, as defined  
59  
60

1  
2  
3 by the 2007 and the 2012 definitions, co-morbidities and use of cardioprotective medications were  
4 less frequent in the 2012 cohort, likely due to less severe MIs being included as a result of using  
5 more sensitive troponin assays (22). Third, we did not collect haemodynamic variables or other  
6 physiological measures such as haemoglobin levels and glomerular filtration rate in analysing clinical  
7 presentations as these were very inconsistently reported. Fourth, our mortality meta-analyses relied  
8 on crude mortality rates reported in each study, with 55% of studies (15-19, 22-28, 30, 31, 34, 35,  
9 37, 40-42, 45, 46, 52) also undertaking multivariate regression and/or competing risk analyses and  
10 reporting adjusted mortality rates. For the T2MI cohorts in general, these rates tended to be lower  
11 and the differences in rates compared to those of T1MI were of smaller magnitude. Similarly, we did  
12 not attempt sub-analyses based on risk stratification using validated risk scores or seek to identify  
13 predictive models for mortality, as such analyses were reported in only two studies (26, 40). Fifth,  
14 we did not analyse 30-day readmission rates as these were reported in only three studies (13, 14,  
15 23). Sixth, we did not perform sensitivity analyses comparing results of prospective versus  
16 retrospective studies, as neither group demonstrated less or more risk of bias than the other, or  
17 compared results of good quality studies against fair/poor quality studies as the latter comprised  
18 only 17% of all patients. Seventh, as we searched only two databases and did not include grey  
19 literature, relevant studies may have been missed, although in a recent analysis searching MEDLINE  
20 and EMBASE combined yielded 93% of relevant studies, with Google Scholar, despite requiring much  
21 more time and effort, only yielded another 3% (57). Eighth, while publication bias is possible, all  
22 funnel plots performed for every analysis showed no asymmetry. Finally, we did not perform  
23 subgroup analyses or meta-regression in assessing between-study heterogeneity, as study  
24 parameters (such as study design and analytic methods) were often ill-defined and widely variable  
25 across this large number of real-world observational studies (58).  
26  
27  
28  
29  
30  
31  
32  
33

34 The strengths of this review are the inclusion of all contemporary cohort studies in the troponin era  
35 that employed formal definitions of T2MI, analysis of a broader range of variables than those of  
36 previous studies, and the more precise discernment of clinically meaningful differences between the  
37 two MI populations in patient characteristics, clinical presentation, patterns of care and outcomes.  
38 As studies originated from several different jurisdictions, we believe our findings are generalisable to  
39 different healthcare systems, although absolute values for some measures did vary between  
40 countries. We are aware of a large US cohort study published since completion of our review (59)  
41 which compared T1MI with T2MI patients, but was limited by misclassification bias (relying on  
42 administrative hospital discharge data containing an International Classification of Diseases-10th  
43 Revision code specific for type 2 MI, rather than a registry or chart diagnosis based on a formal MI  
44 definition), short study period of 3 months in late 2017, and inability to analyse clinical features,  
45 investigation results, medication use, coronary anatomy, and post-discharge mortality due to their  
46 omission in the datasets.  
47  
48  
49  
50  
51

## 52 Conclusion

53  
54 This review has identified differences between T2MI and T1MI patients in presenting clinical  
55 features, investigation and management profiles, and clinical outcomes. These findings may assist  
56 clinicians to better recognise T2MI and advise patients about its sequelae, and inform hospital  
57 coding and epidemiological trending, quality of care indicators and inter-hospital benchmarking of  
58 performance relating to the care of patients with T2MI.  
59  
60

1  
2  
3 The review has also defined persisting gaps in our understanding of the utility and prognostic effects  
4 of invasive investigations, revascularization strategies and cardioprotective medications in T2MI  
5 patients that warrant more randomised trials that enrol such patients.  
6  
7  
8  
9  
10  
11  
12  
13  
14  
15  
16  
17  
18  
19  
20  
21  
22  
23  
24  
25  
26  
27  
28  
29  
30  
31  
32  
33  
34  
35  
36  
37  
38  
39  
40  
41  
42  
43  
44  
45  
46  
47  
48  
49  
50  
51  
52  
53  
54  
55  
56  
57  
58  
59  
60

For peer review only

## Tables

Table 1. Pre-existing medical conditions in patients with T2MI versus T1MI.

| Pre-existing medical condition | T2MI                                            |                          |       | T1MI                                            |                          |       | Odds ratio* (95% CI) |
|--------------------------------|-------------------------------------------------|--------------------------|-------|-------------------------------------------------|--------------------------|-------|----------------------|
|                                | Number of patients with the specified condition | Total number of patients | %     | Number of patients with the specified condition | Total number of patients | %     |                      |
| CAD                            | 3352                                            | 10303                    | 32.5% | 22222                                           | 92725                    | 24%   | 1.1 [0.93, 1.31]     |
| Type 2 DM                      | 3044                                            | 12157                    | 25%   | 23287                                           | 93345                    | 24.9% | 0.97 [0.85, 1.10]    |
| HTN                            | 7536                                            | 11021                    | 66.4% | 55782                                           | 88017                    | 63.4% | 1.22 [1.03, 1.45]    |
| Dyslipidaemia                  | 4626                                            | 10652                    | 43.4% | 40099                                           | 87366                    | 45.9% | 0.74 [0.58, 0.94]    |
| Smoker                         | 3448                                            | 9929                     | 34.7% | 39548                                           | 74889                    | 52.8% | 0.60 [0.49, 0.73]    |
| Obesity                        | 1225                                            | 3672                     | 33.4% | 30963                                           | 56970                    | 54.3% | 0.63 [0.46, 0.87]    |
| Renal failure                  | 1378                                            | 6040                     | 22.8% | 11300                                           | 65394                    | 17.3% | 1.87 [1.53, 2.28]    |
| Heart failure                  | 1661                                            | 8873                     | 13.1% | 5617                                            | 74212                    | 7.6%  | 2.35 [1.82, 3.03]    |
| PVD                            | 584                                             | 5856                     | 10.0% | 2066                                            | 41280                    | 5.0%  | 1.33 [1.05, 1.69]    |
| CVD                            | 969                                             | 8538                     | 11.3% | 6060                                            | 87822                    | 6.9%  | 1.47 [1.27, 1.71]    |
| Atrial fibrillation            | 836                                             | 3645                     | 22.9% | 1220                                            | 19843                    | 6.1%  | 3.02 [2.29, 3.99]    |
| COPD                           | 800                                             | 5018                     | 15.9% | 823                                             | 48375                    | 1.7%  | 1.94 [1.22, 3.08]    |
| Illicit drug Use               | 46                                              | 204                      | 22.5% | 8                                               | 220                      | 3.6%  | 8.15 [1.03, 64.46]   |

\*Comparing T2MI with T1MI patients, with odds ratio adjusted according to study weighting using random effects meta-analysis  
Abbreviations: CAD= coronary heart disease, DM= diabetes mellitus, HTN= hypertension, BMI= body mass index, PVD= peripheral vascular disease, CVD= cerebrovascular disease, COPD= chronic obstructive pulmonary disease

Table 2. Pharmacological management and invasive interventions in patients with T2MI versus T1MI.

| Intervention                                                                                                                                                                                                                                                               | T2MI                                |                          |       | T1MI                                |                          |       | Odds ratio*<br>(95% CI) |
|----------------------------------------------------------------------------------------------------------------------------------------------------------------------------------------------------------------------------------------------------------------------------|-------------------------------------|--------------------------|-------|-------------------------------------|--------------------------|-------|-------------------------|
|                                                                                                                                                                                                                                                                            | No. patients receiving intervention | Total number of patients | %     | No. patients receiving intervention | Total number of patients | %     |                         |
| <b>Medication</b>                                                                                                                                                                                                                                                          |                                     |                          |       |                                     |                          |       |                         |
| Beta blockers                                                                                                                                                                                                                                                              | 4967                                | 8523                     | 58.3% | 63431                               | 83157                    | 76.3% | 0.45 [0.33, 0.63]       |
| ACEI / ARB                                                                                                                                                                                                                                                                 | 3766                                | 7842                     | 48%   | 56253                               | 81793                    | 68.8% | 0.52 [0.40, 0.67]       |
| Anti-platelets                                                                                                                                                                                                                                                             | 5087                                | 8599                     | 70.8% | 74377                               | 84004                    | 88.5% | 0.25 [0.16, 0.38]       |
| Anti-coagulants                                                                                                                                                                                                                                                            | 1519                                | 5255                     | 28.9% | 15754                               | 62415                    | 25.2% | 1.87 [1.06, 3.30]       |
| Anti-anginal agents                                                                                                                                                                                                                                                        | 1281                                | 2191                     | 58.5% | 38955                               | 42768                    | 91.1% | 0.61 [0.21, 1.74]       |
| Diuretics                                                                                                                                                                                                                                                                  | 1336                                | 2985                     | 44.8% | 6211                                | 45779                    | 13.6% | 1.98 [1.37, 2.86]       |
| Statins                                                                                                                                                                                                                                                                    | 3418                                | 6455                     | 52.9% | 56875                               | 64942                    | 87.6% | 0.25 [0.16, 0.38]       |
| <b>Invasive</b>                                                                                                                                                                                                                                                            |                                     |                          |       |                                     |                          |       |                         |
| PCI                                                                                                                                                                                                                                                                        | 2092                                | 9936                     | 21.1% | 67411                               | 86425                    | 78%   | 0.06 [0.04, 0.10]       |
| CABG                                                                                                                                                                                                                                                                       | 102                                 | 3451                     | 2.9%  | 3101                                | 48731                    | 6.4%  | 0.23 [0.12, 0.45]       |
| *Comparing T2MI with T1MI patients, with odds ratio adjusted according to study weighting using random effects meta-analysis                                                                                                                                               |                                     |                          |       |                                     |                          |       |                         |
| Abbreviations: ACEI= Angiotensin converting enzyme inhibitors, ARB= Angiotensin receptor blockers; CI=confidence interval; T2MI=type 2 myocardial infarction; T1MI=type 1 myocardial infarction; PCI=percutaneous coronary intervention; CABG=coronary artery bypass graft |                                     |                          |       |                                     |                          |       |                         |

1  
2  
3  
4  
5  
6  
7  
8  
9  
10  
11  
12  
13  
14  
15  
16  
17  
18  
19  
20  
21  
22  
23  
24  
25  
26  
27  
28  
29  
30  
31  
32  
33  
34  
35  
36  
37  
38  
39  
40  
41  
42  
43  
44  
45  
46  
47  
48  
49  
50  
51  
52  
53  
54  
55  
56  
57  
58  
59  
60

| Table 3. Outcomes in patients with T2MI versus T1MI.                                                                                                                       |                           |                          |       |                           |                          |       |                         |
|----------------------------------------------------------------------------------------------------------------------------------------------------------------------------|---------------------------|--------------------------|-------|---------------------------|--------------------------|-------|-------------------------|
| Outcomes                                                                                                                                                                   | T2MI                      |                          |       | T1MI                      |                          |       | Odds ratio*<br>(95% CI) |
|                                                                                                                                                                            | No. patients with outcome | Total number of patients | %     | No. patients with outcome | Total number of patients | %     |                         |
| CV in-hospital mortality                                                                                                                                                   | 184                       | 2109                     | 8.7%  | 331                       | 6248                     | 5.3%  | 1.61 [1.17, 2.22]       |
| All-cause in-hospital mortality                                                                                                                                            | 667                       | 5321                     | 12.5% | 1508                      | 25997                    | 5.8%  | 1.94 [1.35, 2.79]       |
| Short-term all-cause mortality                                                                                                                                             | 204                       | 887                      | 23.0% | 250                       | 1998                     | 12.5% | 1.34 [0.63, 2.85]       |
| 1-year all-cause mortality                                                                                                                                                 | 632                       | 3340                     | 18.9% | 1299                      | 24203                    | 5.4%  | 3.11 [1.91, 5.08]       |
| 2-year all-cause mortality                                                                                                                                                 | 246                       | 926                      | 26.6% | 428                       | 2587                     | 16.5% | 1.63 [1.11, 2.41]       |
| 3-year all-cause mortality                                                                                                                                                 | 193                       | 525                      | 36.8% | 710                       | 4305                     | 16.5% | 2.00 [1.07, 3.76]       |
| Long-term all-cause mortality                                                                                                                                              | 1453                      | 2708                     | 53.7% | 1320                      | 4633                     | 28.5% | 3.24 [2.73, 3.84]       |
| *Comparing T1MI with T2MI patients, with odds ratio adjusted according to study weighting using random effects meta-analysis                                               |                           |                          |       |                           |                          |       |                         |
| Abbreviations: CV= Cardiovascular, MACE= Major adverse cardiovascular events; T2MI=type 2 myocardial infarction; T1MI=type 1 myocardial infarction; CI=confidence interval |                           |                          |       |                           |                          |       |                         |

## Figures

Figure 1. Forest plot of one-year all-cause mortality of T2MI patients compared to T1MI patients.

Figure 2. Forest plot of long-term all-cause mortality of T2MI patients compared to T1MI patients.

Figure S1. PRISMA flow diagram.

Figure S2. Forest Plot. Presence of Ischaemic Heart Disease.

Figure S3. Forest Plot. Presence of Type 2 Diabetes Mellitus.

Figure S4. Forest Plot. Presence of Hypertension.

Figure S5. Forest Plot. Presence of Dyslipidaemia.

Figure S6. Forest Plot. Smoking Status.

Figure S7. Forest Plot. Obesity Status.

Figure S8. Forest Plot. Presence of Chronic Kidney Disease.

1  
2  
3 Figure S9. Forest Plot. Presence of Heart Failure.  
4

5 Figure S10. Forest Plot. Presence of Peripheral Vascular Disease.  
6

7 Figure S11. Forest Plot. Presence of Cerebrovascular Disease.  
8

9 Figure S12. Forest Plot. Presence of Illicit Drug Use.  
10

11 Figure S13. Forest Plot. Presence of Atrial Fibrillation.  
12

13 Figure S14. Forest Plot. Chest Pain as Presenting Feature.  
14

15 Figure S15. Forest Plot. Dyspnoea as Presenting Feature.  
16

17 Figure S16. Forest Plot. Arm / Shoulder Discomfort as Presenting Feature.  
18

19 Figure S17. Forest Plot. Nausea / Vomiting as Presenting Feature.  
20

21 Figure S18. Forest Plot. Non-specific Symptoms as Presenting Features.  
22

23 Figure S19. Forest Plot. Collapse / Syncope as Presenting Features.  
24

25 Figure S20. Forest Plot. ST Elevation on ECG.  
26

27 Figure S21. Forest Plot. ST Depression or T Wave Inversion on ECG.  
28

29 Figure S22. Forest Plot. Q Waves on ECG.  
30

31 Figure S23. Forest Plot. Non-specific ST Changes on ECG.  
32

33 Figure S24. Forest Plot. Left Bundle Branch Block on ECG.  
34

35 Figure S25. Forest Plot. Atrial Fibrillation on ECG.  
36

37 Figure S26. Forest Plot. Coronary Angiogram Performed.  
38

39 Figure S27. Forest Plot. Obstructive Coronary Artery Disease on Coronary Angiogram.  
40

41 Figure S28. Forest Plot. Multivessel Disease on Coronary Angiogram.  
42

43 Figure S29. Forest Plot. Echocardiogram Performed.  
44

45 Figure S30. Forest Plot. Regional Wall Motion Abnormalities on Echocardiogram.  
46

47 Figure S31. Forest Plot. Beta-Blockers Prescribed.  
48

49 Figure S32. Forest Plot. ACEi/ARB Prescribed.  
50

51 Figure S33. Forest Plot. Antiplatelets Prescribed.  
52

53 Figure S34. Forest Plot. Anticoagulants Prescribed.  
54

55 Figure S35. Forest Plot. Antianginal Drugs Prescribed.  
56

57 Figure S36. Forest Plot. Diuretics Prescribed.  
58

59 Figure S37. Forest Plot. Statins Prescribed.  
60

Figure S38. Forest Plot. Percutaneous Coronary Intervention Performed.

Figure S39. Forest Plot. Coronary Artery Bypass Graft Performed.

1  
2  
3 Figure S40. Forest Plot. All cause In-hospital mortality. T2MI compared to T1MI.  
4

5 Figure S41. Forest Plot. Short-term all-cause mortality. T2MI compared to T1MI.  
6

7 Figure S42. Forest Plot. Two-year all-cause mortality. T2MI compared to T1MI.  
8

9 Figure S43. Forest Plot. Three-year all-cause mortality. T2MI compared to T1MI.  
10

11 Figure S44. Forest Plot. CVS In-hospital mortality. T2MI compared to T1MI.  
12

13 Figure S45. Funnel Plot. All-cause In-hospital mortality. T2MI compared to T1MI.  
14

15 Figure S46. Funnel Plot. One-year All-cause mortality. T2MI compared to T1MI.  
16

## 17 Contribution Statement

18 All authors (KW, MK, IS) contributed to the conception of the work. MK and KW performed the  
19 acquisition and analysis of the data. KW and IS were responsible for the interpretation of data. All  
20 authors (MK, KW, IS) were responsible for drafting manuscript and final approval of the version to be  
21 published. All authors (KW, MK, IS) agree to be accountable for all aspects of the work in ensuring  
22 that questions related to the accuracy or integrity of any part of the work are appropriately  
23 investigated and resolved.  
24

## 25 Competing Interests

26 The authors declare there are no conflict of interest with respect the article.  
27

## 28 Funding

29 This research received no specific grant from any funding agency in the public, commercial or not-  
30 for-profit sectors.  
31

## 32 Data Sharing Statement

33 All data relevant to the study are included in the article or uploaded as supplementary information.  
34

## 35 Ethic Approval Statement

36 No ethics approval was sought for this research project as no patient data was used.  
37  
38  
39  
40  
41  
42  
43  
44  
45  
46  
47  
48  
49  
50  
51  
52  
53  
54  
55  
56  
57  
58  
59  
60



## References

1. Thygesen K, Alpert JS, White HD, Jaffe AS, Apple FS, Galvani M, et al. Universal definition of myocardial infarction. *Circulation*. 2007;116(22):2634-53.
2. Thygesen K, Alpert JS, Jaffe AS, Simoons ML, Chaitman BR, White HD, et al. Third universal definition of myocardial infarction. *Circulation*. 2012;126(16):2020-35.
3. Thygesen K, Alpert JS, Jaffe AS, Chaitman BR, Bax JJ, Morrow DA, et al. Fourth Universal Definition of Myocardial Infarction (2018). *J Am Coll Cardiol*. 2018;72(18):2231-64.
4. Lippi G, Sanchis-Gomar F, Cervellin G. Chest pain, dyspnea and other symptoms in patients with type 1 and 2 myocardial infarction. A literature review. *International journal of cardiology*. 2016;215:20-2.
5. Lippi G, Sanchis-Gomar F, Cervellin G. Cardiac troponins and mortality in type 1 and 2 myocardial infarction. *Clinical chemistry and laboratory medicine*. 2017;55(2):181-8.
6. Gupta S, Vaidya SR, Arora S, Bahekar A, Devarapally SR. Type 2 versus type 1 myocardial infarction: a comparison of clinical characteristics and outcomes with a meta-analysis of observational studies. *Cardiovasc Diagn Ther*. 2017;7(4):348-58.
7. Reid C, Alturki A, Yan A, So D, Ko D, Tanguay JF, et al. Meta-analysis Comparing Outcomes of Type 2 Myocardial Infarction and Type 1 Myocardial Infarction With a Focus on Dual Antiplatelet Therapy. *CJC Open*. 2020;2(3):118-28.
8. Wang G, Zhao N, Zhong S, Li J. A systematic review on the triggers and clinical features of type 2 myocardial infarction. *Clin Cardiol*. 2019;42(10):1019-27.
9. Moher D, Liberati A, Tetzlaff J, Altman DG. Preferred reporting items for systematic reviews and meta-analyses: the PRISMA statement. *PLoS medicine*. 2009;6(7):e1000097.
10. Riley RD, Higgins JP, Deeks JJ. Interpretation of random effects meta-analyses. *BMJ*. 2011;342:d549.
11. Stang A. Critical evaluation of the Newcastle-Ottawa scale for the assessment of the quality of nonrandomized studies in meta-analyses. *Eur J Epidemiol*. 2010;25(9):603-5.
12. GA Wells BS, D O'Connell, J Peterson, V Welch, M Losos, P Tugwell. The Newcastle-Ottawa Scale (NOS) for assessing the quality of nonrandomised studies in meta-analyses: Ottawa Hospital Research Institute; 2011 [Available from: [http://www.ohri.ca/programs/clinical\\_epidemiology/oxford.asp](http://www.ohri.ca/programs/clinical_epidemiology/oxford.asp)].
13. Arora S, Strassle PD, Qamar A, Wheeler EN, Levine AL, Misenheimer JA, et al. Impact of Type 2 Myocardial Infarction (MI) on Hospital-Level MI Outcomes: Implications for Quality and Public Reporting. *Journal of the American Heart Association*. 2018;7(7).
14. Balanescu DV, Donisan T, Deswal A, Palaskas N, Song J, Lopez-Mattei J, et al. Acute myocardial infarction in a high-risk cancer population: Outcomes following conservative versus invasive management. *International journal of cardiology*. 2020;313:1-8.
15. Baron T, Hambraeus K, Sundstrom J, Erlinge D, Jernberg T, Lindahl B. Impact on Long-Term Mortality of Presence of Obstructive Coronary Artery Disease and Classification of Myocardial Infarction. *Am J Med*. 2016;129(4):398-406.
16. Bonaca MP, Wiviott SD, Braunwald E, Murphy SA, Ruff CT, Antman EM, et al. American College of Cardiology/American Heart Association/European Society of Cardiology/World Heart Federation universal definition of myocardial infarction classification system and the risk of cardiovascular death: observations from the TRITON-TIMI 38 trial (Trial to Assess Improvement in Therapeutic Outcomes by Optimizing Platelet Inhibition With Prasugrel-Thrombolysis in Myocardial Infarction 38). *Circulation*. 2012;125(4):577-83.
17. Cedieli G, Gonzalez-Del-Hoyo M, Carrasquer A, Sanchez R, Boqué C, Bardají A. Outcomes with type 2 myocardial infarction compared with non-ischaemic myocardial injury. *Heart (British Cardiac Society)*. 2017;103(8):616-22.

18. Chapman AR, Adamson PD, Shah ASV, Anand A, Strachan FE, Ferry AV, et al. High-Sensitivity Cardiac Troponin and the Universal Definition of Myocardial Infarction. *Circulation*. 2020;141(3):161-71.
19. Chapman AR, Shah ASV, Lee KK, Anand A, Francis O, Adamson P, et al. Long-Term Outcomes in Patients With Type 2 Myocardial Infarction and Myocardial Injury. *Circulation*. 2018;137(12):1236-45.
20. Consuegra-Sánchez L, Martínez-Díaz JJ, de Guadiana-Romualdo LG, Wasniewski S, Esteban-Torrella P, Clavel-Ruipérez FG, et al. No additional value of conventional and high-sensitivity cardiac troponin over clinical scoring systems in the differential diagnosis of type 1 vs. type 2 myocardial infarction. *Clinical chemistry and laboratory medicine*. 2018;56(5):857-64.
21. El-Haddad H, Robinson E, Swett K, Wells GL. Prognostic implications of type 2 myocardial infarctions. 2012.
22. Etaher A, Gibbs OJ, Saad YM, Frost S, Nguyen TL, Ferguson I, et al. Type-II myocardial infarction and chronic myocardial injury rates, invasive management, and 4-year mortality among consecutive patients undergoing high-sensitivity troponin T testing in the emergency department. *European heart journal Quality of care & clinical outcomes*. 2020;6(1):41-8.
23. Furie N, Israel A, Gilad L, Neuman G, Assad F, Ben-Zvi I, et al. Type 2 myocardial infarction in general medical wards: Clinical features, treatment, and prognosis in comparison with type 1 myocardial infarction. *Medicine*. 2019;98(41):e17404.
24. Guimarães PO, Leonardi S, Huang Z, Wallentin L, de Werf FV, Aylward PE, et al. Clinical features and outcomes of patients with type 2 myocardial infarction: Insights from the Thrombin Receptor Antagonist for Clinical Event Reduction in Acute Coronary Syndrome (TRACER) trial. *Am Heart J*. 2018;196:28-35.
25. Hawatmeh A, Thawabi M, Aggarwal R, Abirami C, Vavilin I, Wasty N, et al. Implications of Misclassification of Type 2 Myocardial Infarction on Clinical Outcomes. *Cardiovascular revascularization medicine : including molecular interventions*. 2020;21(2):176-9.
26. Higuchi S, Suzuki M, Horiuchi Y, Tanaka H, Saji M, Yoshino H, et al. Higher non-cardiac mortality and lesser impact of early revascularization in patients with type 2 compared to type 1 acute myocardial infarction: results from the Tokyo CCU Network registry. *Heart Vessels*. 2019;34(7):1140-7.
27. Javed U, Aftab W, Ambrose JA, Wessel RJ, Mouanoutoua M, Huang G, et al. Frequency of elevated troponin I and diagnosis of acute myocardial infarction. *The American journal of cardiology*. 2009;104(1):9-13.
28. Kadesjö E, Roos A, Siddiqui A, Desta L, Lundbäck M, Holzmann MJ. Acute versus chronic myocardial injury and long-term outcomes. *Heart (British Cardiac Society)*. 2019;105(24):1905-12.
29. Lambrecht S, Sarkisian L, Saaby L, Poulsen TS, Gerke O, Hosbond S, et al. Different Causes of Death in Patients with Myocardial Infarction Type 1, Type 2, and Myocardial Injury. *Am J Med*. 2018;131(5):548-54.
30. Landes U, Bental T, Orvin K, Vaknin-Assa H, Rechavia E, Iakobishvili Z, et al. Type 2 myocardial infarction: A descriptive analysis and comparison with type 1 myocardial infarction. *Journal of cardiology*. 2016;67(1):51-6.
31. López-Cuenca A, Gómez-Molina M, Flores-Blanco PJ, Sánchez-Martínez M, García-Narbon A, De Las Heras-Gómez I, et al. Comparison between type-2 and type-1 myocardial infarction: clinical features, treatment strategies and outcomes. *J Geriatr Cardiol*. 2016;13(1):15-22.
32. Meigher S, Thode HC, Peacock WF, Bock JL, Gruberg L, Singer AJ. Causes of Elevated Cardiac Troponins in the Emergency Department and Their Associated Mortality. *Academic emergency medicine : official journal of the Society for Academic Emergency Medicine*. 2016;23(11):1267-73.
33. Nestelberger T, Boeddinghaus J, Badertscher P, Twerenbold R, Wildi K, Breitenbücher D, et al. Effect of Definition on Incidence and Prognosis of Type 2 Myocardial Infarction. *J Am Coll Cardiol*. 2017;70(13):1558-68.

34. Neumann JT, Sørensen NA, Rübtsamen N, Ojeda F, Renné T, Qaderi V, et al. Discrimination of patients with type 2 myocardial infarction. *Eur Heart J*. 2017;38(47):3514-20.
35. Paiva L, Providencia R, Barra S, Dinis P, Faustino AC, Goncalves L. Universal definition of myocardial infarction: clinical insights. *Cardiology*. 2015;131(1):13-21.
36. Pandey AK, Duong T, Swiatkiewicz I, Daniels LB. A Comparison of Biomarker Rise in Type 1 and Type 2 Myocardial Infarction. *The American journal of medicine*. 2020;133(10):1203-8.
37. Putot A, Derrida SB, Zeller M, Avondo A, Ray P, Manckoundia P, et al. Short-Term Prognosis of Myocardial Injury, Type 1, and Type 2 Myocardial Infarction in the Emergency Unit. *Am J Med*. 2018;131(10):1209-19.
38. Putot A, Jeanmichel M, Chagué F, Avondo A, Ray P, Manckoundia P, et al. Type 1 or type 2 myocardial infarction in patients with a history of coronary artery disease: Data from the emergency department. *Journal of Clinical Medicine*. 2019;8(12).
39. Putot A, Jeanmichel M, Chague F, Manckoundia P, Cottin Y, Zeller M. Type 2 Myocardial Infarction: A Geriatric Population-based Model of Pathogenesis. *Aging and disease*. 2020;11(1):108-17.
40. Radovanovic D, Pilgrim T, Seifert B, Urban P, Pedrazzini G, Erne P. Type 2 myocardial infarction: incidence, presentation, treatment and outcome in routine clinical practice. *Journal of cardiovascular medicine (Hagerstown, Md)*. 2017;18(5):341-7.
41. Raphael CE, Roger VL, Sandoval Y, Singh M, Bell M, Lerman A, et al. Incidence, Trends, and Outcomes of Type 2 Myocardial Infarction in a Community Cohort. *Circulation*. 2020;141(6):454-63.
42. Reed GW, Horr S, Young L, Clevenger J, Malik U, Ellis SG, et al. Associations Between Cardiac Troponin, Mechanism of Myocardial Injury, and Long-Term Mortality After Noncardiac Vascular Surgery. *Journal of the American Heart Association*. 2017;6(6).
43. Saaby L, Poulsen TS, Diederichsen AC, Hosbond S, Larsen TB, Schmidt H, et al. Mortality rate in type 2 myocardial infarction: observations from an unselected hospital cohort. *Am J Med*. 2014;127(4):295-302.
44. Saaby L, Poulsen TS, Hosbond S, Larsen TB, Pyndt Diederichsen AC, Hallas J, et al. Classification of myocardial infarction: frequency and features of type 2 myocardial infarction. *Am J Med*. 2013;126(9):789-97.
45. Sandoval Y, Smith SW, Sexter A, Thordsen SE, Bruen CA, Carlson MD, et al. Type 1 and 2 Myocardial Infarction and Myocardial Injury: Clinical Transition to High-Sensitivity Cardiac Troponin I. *Am J Med*. 2017;130(12):1431-9.e4.
46. Sandoval Y, Thordsen SE, Smith SW, Schulz KM, Murakami MM, Pearce LA, et al. Cardiac troponin changes to distinguish type 1 and type 2 myocardial infarction and 180-day mortality risk. *European heart journal Acute cardiovascular care*. 2014;3(4):317-25.
47. Sato R, Sakamoto K, Kaikita K, Tsujita K, Nakao K, Ozaki Y, et al. Long-Term Prognosis of Patients with Myocardial Infarction Type 1 and Type 2 with and without Involvement of Coronary Vasospasm. *Journal of clinical medicine*. 2020;9(6).
48. Shah AS, McAllister DA, Mills R, Lee KK, Churchhouse AM, Fleming KM, et al. Sensitive troponin assay and the classification of myocardial infarction. *Am J Med*. 2015;128(5):493-501.e3.
49. Singh A, Gupta A, DeFilippis EM, Qamar A, Biery DW, Almarzooq Z, et al. Cardiovascular Mortality After Type 1 and Type 2 Myocardial Infarction in Young Adults. *Journal of the American College of Cardiology*. 2020;75(9):1003-13.
50. Smilowitz NR, Subramanyam P, Gianos E, Reynolds HR, Shah B, Sedlis SP. Treatment and outcomes of type 2 myocardial infarction and myocardial injury compared with type 1 myocardial infarction. *Coronary artery disease*. 2018;29(1):46-52.
51. Stein GY, Herscovici G, Korenfeld R, Matetzky S, Gottlieb S, Alon D, et al. Type-II myocardial infarction—patient characteristics, management and outcomes. *PLoS One*. 2014;9(1):e84285.
52. Truong HH, Victor MV, Imad MA, Kobalava ZD, Parvathy UT, Al-Zakwani I. Mortality and morbidity associated with type 2 myocardial infarction: A single-center study. *Annals of Clinical Cardiology*. 2020;2(2):70-9.

- 1  
2  
3 53. Alpert JS, Thygesen KA, White HD, Jaffe AS. Diagnostic and therapeutic implications of type 2  
4 myocardial infarction: review and commentary. *Am J Med.* 2014;127(2):105-8.  
5 54. Gaggin HK, Liu Y, Lyass A, van Kimmenade RR, Motiwala SR, Kelly NP, et al. Incident Type 2  
6 Myocardial Infarction in a Cohort of Patients Undergoing Coronary or Peripheral Arterial  
7 Angiography. *Circulation.* 2017;135(2):116-27.  
8  
9 55. Lambrakis K, French JK, Scott IA, Briffa T, Brieger D, Farkouh ME, et al. The appropriateness of  
10 coronary investigation in myocardial injury and Type 2 myocardial infarction (ACT-2): A randomized  
11 trial design. *Am Heart J* 2019; 208:11-20.  
12  
13 56. Hartikainen TS, Sorensen NA, Haller PM, Goßling A, Lehmacher J, Zeller T, et al. Clinical  
14 application of the 4th Universal Definition of myocardial infarction. *Eur Heart J* 2020; 41: 2209-2216.  
15  
16 57. Bramer WM, Rethlefsen ML, Kleijnen J, Franco OH. Optimal database combinations for literature  
17 searches in systematic reviews: a prospective exploratory study. *Syst Rev* 2017; 6: 245-256.  
18  
19 58. Metelli S, Chaimani A. Challenges in meta-analyses with observational studies. *Evid Based Ment*  
20 *Health* 2020;23:83–87.  
21  
22 59. McCarthy CP, Kolte D, Kennedy KF, Vaduganathan M, Wasfy JH, Januzzi JL. Patient  
23 characteristics and clinical outcomes of Type 1 versus Type 2 myocardial infarction. *Am Coll Cardiol*  
24 *2021;77: 848–57.*  
25  
26  
27  
28  
29  
30  
31  
32  
33  
34  
35  
36  
37  
38  
39  
40  
41  
42  
43  
44  
45  
46  
47  
48  
49  
50  
51  
52  
53  
54  
55  
56  
57  
58  
59  
60

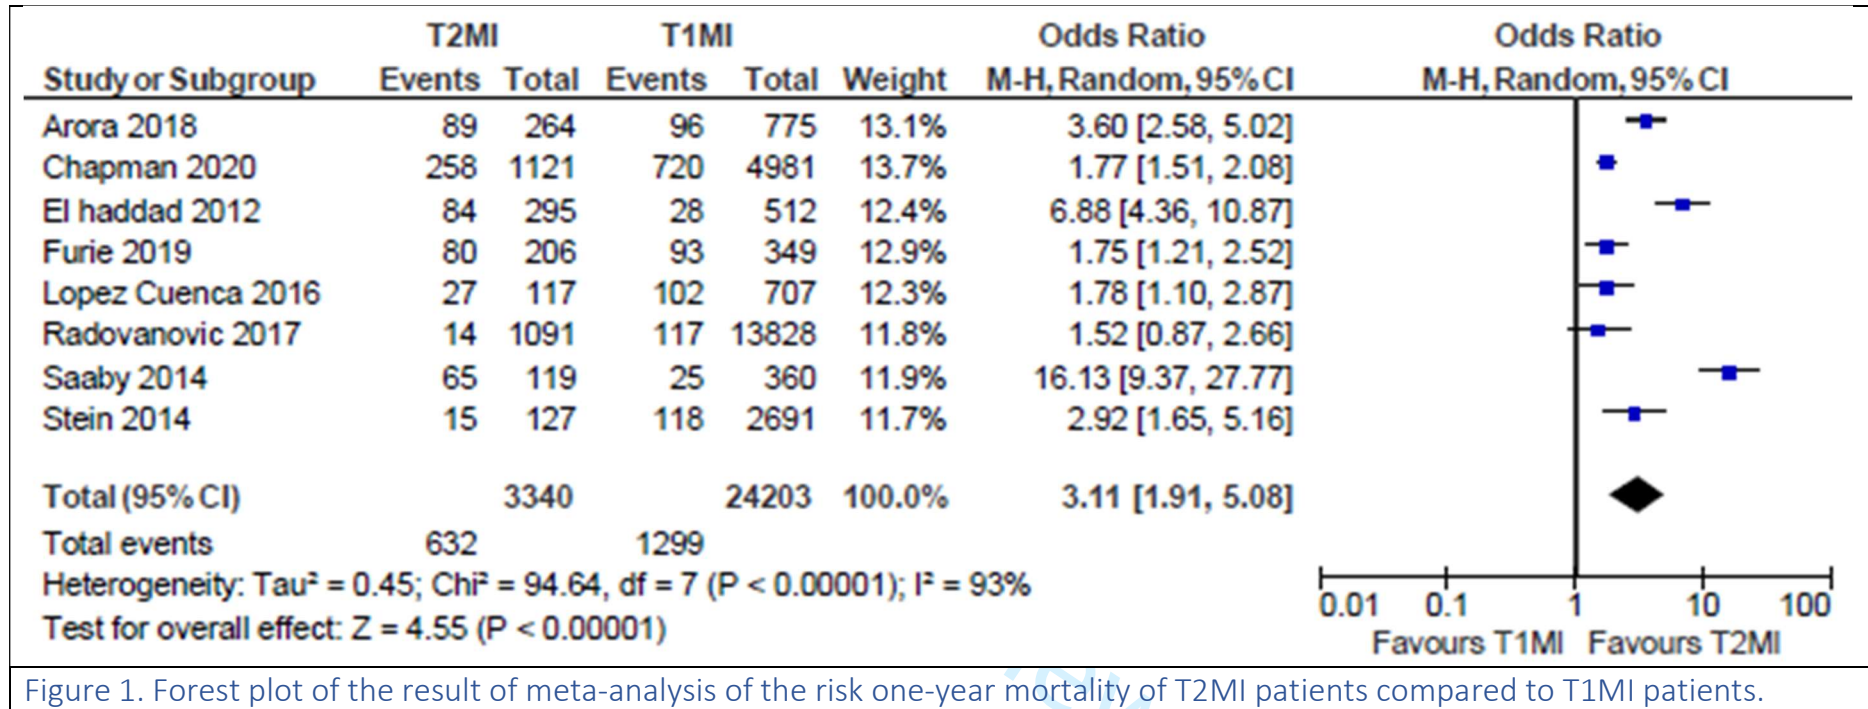

Figure 1. Forest plot of the result of meta-analysis of the risk one-year mortality of T2MI patients compared to T1MI patients.

1  
2  
3  
4  
5  
6  
7  
8  
9  
10  
11  
12  
13  
14  
15  
16  
17  
18  
19  
20  
21  
22  
23  
24  
25  
26  
27  
28  
29  
30  
31  
32  
33  
34  
35  
36  
37  
38  
39  
40  
41  
42  
43  
44  
45  
46

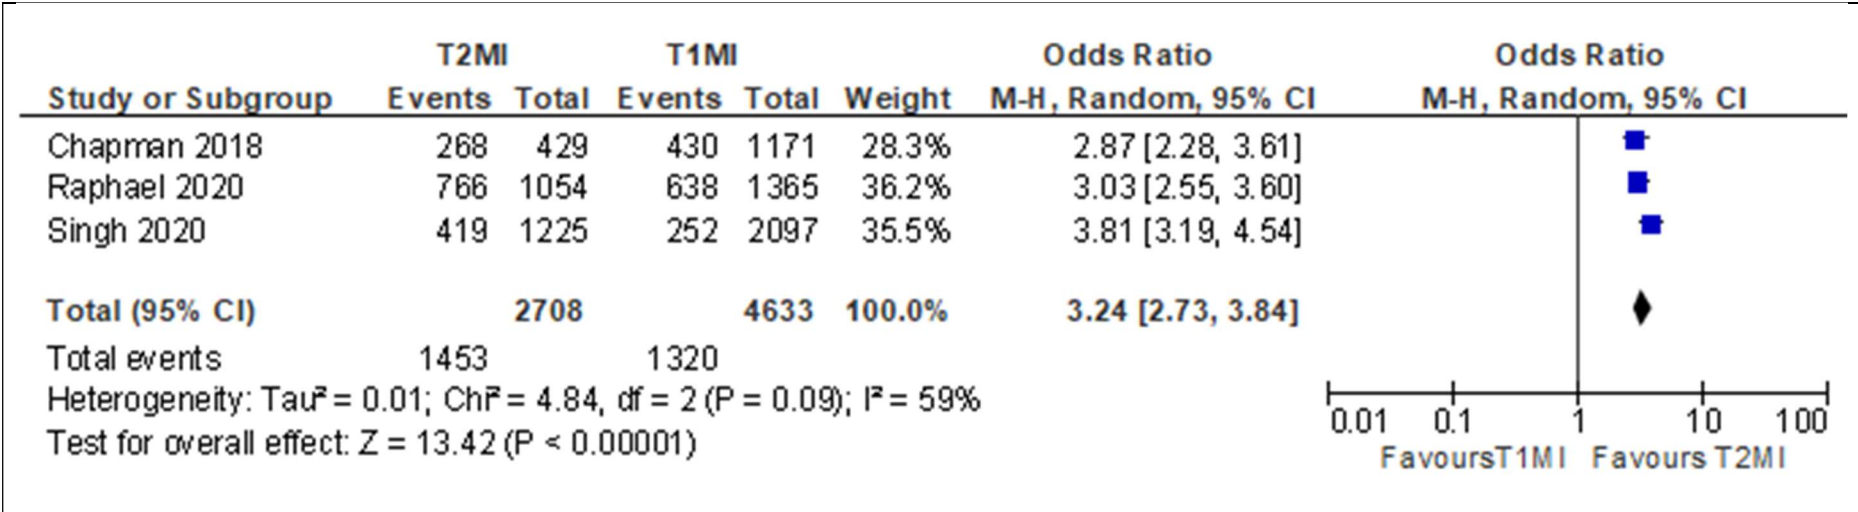

Figure 2. Forest plot of the result of meta-analysis of the risk long-term mortality of T2MI patients compared to T1MI patients.

Review only

Table S1. Evolving definitions of Type 2 Myocardial Infarction.

| Year | Universal Definition of Type 2 Myocardial Infarction                                                                                                                                                                                                                                                                                                                                                                                                                                                                                                                                             |
|------|--------------------------------------------------------------------------------------------------------------------------------------------------------------------------------------------------------------------------------------------------------------------------------------------------------------------------------------------------------------------------------------------------------------------------------------------------------------------------------------------------------------------------------------------------------------------------------------------------|
| 2007 | Myocardial infarction secondary to ischaemia due to either increased oxygen demand or decreased supply, e.g. coronary artery spasm, coronary embolism, anaemia, arrhythmias, hypotension or hypertension                                                                                                                                                                                                                                                                                                                                                                                         |
| 2012 | Instances of myocardial injury with necrosis where a condition other than coronary artery disease contributes to an imbalance between myocardial oxygen supply and/or demand e.g. coronary artery spasm, coronary embolism, anaemia, arrhythmias, hypotension or hypertension                                                                                                                                                                                                                                                                                                                    |
| 2018 | Detection of a rise and/or fall of cTn values with at least one value above the 99th percentile URL, and evidence of an imbalance between myocardial oxygen supply and demand unrelated to coronary thrombosis, requiring at least one of the following: <ul style="list-style-type: none"> <li>- Symptoms of acute myocardial ischaemia</li> <li>- New ischaemic ECG changes</li> <li>- Development of pathological Q waves</li> <li>- Imaging evidence of new loss of viable myocardium or new regional wall motion abnormality in a pattern consistent with an ischaemic aetiology</li> </ul> |

Table S2. Search strategy.

|                                                                                                                                                                                                                                 |
|---------------------------------------------------------------------------------------------------------------------------------------------------------------------------------------------------------------------------------|
| MEDLINE: (type 2 adj3 myocard*) OR (type-2 adj3 myocard*) OR (type II adj3 myocard*) OR (type-II adj3 myocard*) OR (type 2 adj3 MI) OR (type-2 adj3 MI) OR T2MI OR (supply demand adj3 myocard*)                                |
| EMBASE: ('type 2' NEXT/3 myocard*) OR ('type-2' NEXT/3 myocard*) OR ('type ii' NEXT/3 myocard*) OR ('type-ii' NEXT/3 myocard*) OR ('type 2' NEXT/3 mi) OR ('type-2' NEXT/3 mi) OR ('t2mi') OR ('supply demand' NEXT/3 myocard*) |

Table S3a. Study characteristics

| Author, Year                | Patients |      | Design        | Definition of MI | Geographic location | Screening                                    | Troponin Assay  |
|-----------------------------|----------|------|---------------|------------------|---------------------|----------------------------------------------|-----------------|
|                             | T1MI     | T2MI |               |                  |                     |                                              |                 |
| Arora, 2018 (1)             | 775      | 264  | Retrospective | 2012             | USA                 | NSTEMI patients                              | cTnI            |
| Balanescu, 2020 (2)         | 152      | 49   | Retrospective | 2018             | USA                 | AMI patients                                 | N/A             |
| Baron, 2016 (3)             | 40501    | 1313 | Prospective   | 2007             | Sweden              | AMI patients                                 | hs-cTnT         |
| Bonaca, 2012 (4)            | 359      | 42   | Prospective   | 2007             | Multinational       | TRITON TIMI 38 trial                         | N/A             |
| Cediel, 2017 (5)            | 376      | 194  | Retrospective | 2012             | Spain               | ED patients with at least 1 troponin         | cTnI            |
| Chapman, 2018 (6)           | 1171     | 429  | Prospective   | 2012             | UK                  | ED with elevated troponin                    | cTnI            |
| Chapman, 2020 (7)           | 4981     | 1121 | Prospective   | 2018             | UK                  | Suspected ACS                                | cTnI            |
| Consuegra-Sanchaz, 2018 (8) | 125      | 75   | Retrospective | 2012             | Spain               | ED patients with at least 1 troponin         | cTnI<br>hs-cTnT |
| El-Haddad, 2012 (9)         | 512      | 295  | Retrospective | 2012             | USA                 | Patients with elevated troponin              | N/A             |
| Etaher, 2020 (10)           | 97       | 121  | Prospective   | 2018             | Australia           | Patients with elevated troponin              | N/A             |
| Furie, 2019 (11)            | 349      | 206  | Retrospective | 2012             | Israel              | NSTEMI on general ward                       | Unknown         |
| Guimaraes, 2018 (12)        | 847      | 76   | Retrospective | 2012             | Multinational       | ACS during TRACER trial                      | N/A             |
| Hawatmeh, 2020 (13)         | 664      | 281  | Retrospective | 2012             | USA                 | NSTEMI patients                              | cTnI            |
| Higuchi, 2019 (14)          | 12023    | 491  | Retrospective | 2012             | Tokyo               | Admitted to CCU                              | N/A             |
| Javed, 2009 (15)            | 143      | 64   | Retrospective | 2007             | USA                 | Patients with elevated troponin              | cTnI            |
| Kadesjo, 2019 (16)          | 1111     | 251  | Retrospective | 2018             | Sweden              | MI, Registry                                 | N/A             |
| Lambrecht, 2018 (17)        | 360      | 119  | Prospective   | 2007             | Denmark             | Hospitalised patients with troponin measured | cTnI            |
| Landes, 2016 (18)           | 107      | 107  | Retrospective | 2012             | Israel              | Diagnosed with T2MI and T1MI                 | cTnT            |
| Lopez-Cuenca, 2016 (19)     | 707      | 117  | Retrospective | 2012             | Spain               | Diagnosed with T2MI and T1MI                 | hs-cTnT         |
| Meigher, 2016 (20)          | 340      | 452  | Retrospective | 2012             | Germany             | ED patients with elevated troponin           | cTnI            |
| Nestelberger, 2017 (21)     | 684      | 128  | Prospective   | 2012             | Multinational       | ED patients with MI                          | N/A             |
| Neumann, 2017 (22)          | 188      | 99   | Prospective   | 2012             | Germany             | ED patients with suspected MI                | hs-cTnI         |



|                                                                                                                                                                                                                                                                                             |       |      |               |      |             |                                              |      |
|---------------------------------------------------------------------------------------------------------------------------------------------------------------------------------------------------------------------------------------------------------------------------------------------|-------|------|---------------|------|-------------|----------------------------------------------|------|
| Paiva, 2015 (23)                                                                                                                                                                                                                                                                            | 764   | 236  | Retrospective | 2012 | Portugal    | Admitted to CCU with MI                      | cTnl |
| Pandey, 2020 (24)                                                                                                                                                                                                                                                                           | 97    | 103  | Prospective   | 2018 | USA         | MI                                           | N/A  |
| Putot, 2018 (25)                                                                                                                                                                                                                                                                            | 2036  | 847  | Prospective   | 2012 | France      | ED or cardiology ward with elevated troponin | cTnl |
| Putot, 2019 (26)                                                                                                                                                                                                                                                                            | 365   | 254  | Retrospective | 2018 | France      | Hospitalised patients with CAD               | cTnl |
| Putot, 2020 (27)                                                                                                                                                                                                                                                                            | 3710  | 862  | Retrospective | 2012 | France      | Hospitalised patients with MI                | cTnl |
| Radovanovic, 2017 (28)                                                                                                                                                                                                                                                                      | 13828 | 1091 | Retrospective | 2012 | Switzerland | Diagnosed AMI                                | N/A  |
| Raphael, 2020 (29)                                                                                                                                                                                                                                                                          | 1365  | 1054 | Retrospective | 2018 | USA         | Raised troponin                              | cTnT |
| Reed, 2017 (30)                                                                                                                                                                                                                                                                             | 88    | 162  | Retrospective | 2012 | USA         | Underwent vascular surgery procedure         | cTnT |
| Saaby 2013 (31)                                                                                                                                                                                                                                                                             | 397   | 144  | Prospective   | 2007 | Denmark     | Troponin measured                            | cTnl |
| Saaby, 2014 (32)                                                                                                                                                                                                                                                                            | 360   | 119  | Prospective   | 2007 | Denmark     | Elevated troponin                            | cTnl |
| Sandoval, 2014 (33)                                                                                                                                                                                                                                                                         | 66    | 190  | Retrospective | 2012 | USA         | ED patients with troponin measured           | cTnl |
| Sandoval, 2017 (34)                                                                                                                                                                                                                                                                         | 77    | 140  | Prospective   | 2012 | USA         | ED patients with troponin measured           | cTnl |
| Sato, 2020 (35)                                                                                                                                                                                                                                                                             | 2834  | 155  | Prospective   | 2012 | Japan       | Hospitalised patient with MI                 | N/A  |
| Shah, 2015 (36)                                                                                                                                                                                                                                                                             | 1171  | 429  | Prospective   | 2012 | UK          | Admitted with elevated troponin              | cTnl |
| Singh, 2020 (37)                                                                                                                                                                                                                                                                            | 2097  | 1225 | Retrospective | 2018 | USA         | Age <50, MI or raised troponin               | N/A  |
| Smilowitz, 2018 (38)                                                                                                                                                                                                                                                                        | 137   | 146  | Prospective   | 2012 | USA         | Admitted with raised troponin                | cTnl |
| Stein, 2014 (39)                                                                                                                                                                                                                                                                            | 2691  | 127  | Prospective   | 2007 | Israel      | Admitted to cardiology                       | N/A  |
| Truong, 2020 (40)                                                                                                                                                                                                                                                                           | 275   | 175  | Retrospective | 2012 | Russia      | MI, undergoing angiogram                     | N/A  |
| <i>cTnl = cardiac troponin I; cTnT = cardiac troponin T; hs- = high sensitivity; AMI = acute myocardial infarction; MI = myocardial infarction; ACS = acute coronary syndrome; NSTEMI = non-ST elevation myocardial infarction; CCU = coronary care unit; CAD = coronary artery disease</i> |       |      |               |      |             |                                              |      |

Table S3b. Study characteristics

| Author, Year                | Patients |      | Variables               |          |                |                 |            |           |
|-----------------------------|----------|------|-------------------------|----------|----------------|-----------------|------------|-----------|
|                             | T1MI     | T2MI | Pre-existing conditions | Symptoms | Investigations | Troponin Values | Management | Prognosis |
| Arora, 2018 (1)             | 775      | 264  | X                       |          | X              | X               | X          | X         |
| Balanescu, 2020 (2)         | 152      | 49   |                         | X        | X              |                 | X          |           |
| Baron, 2016 (3)             | 40501    | 1313 | X                       | X        | X              | X               | X          |           |
| Bonaca, 2012 (4)            | 359      | 42   |                         |          |                |                 |            |           |
| Cediel, 2017 (5)            | 376      | 194  | X                       | X        | X              | X               |            | X         |
| Chapman, 2018 (6)           | 1171     | 429  | X                       |          | X              | X               | X          | X         |
| Chapman, 2020 (7)           | 4981     | 1121 | X                       | X        | X              | X               |            | X         |
| Consuegra-Sanchaz, 2018 (8) | 125      | 75   | X                       | X        | X              | X               |            |           |
| El-Haddad, 2012 (9)         | 512      | 295  |                         |          |                |                 |            | X         |
| Etaher, 2020 (10)           | 97       | 121  | X                       |          | X              |                 | X          |           |
| Furie, 2019 (11)            | 349      | 206  | X                       | X        | X              | X               | X          | X         |
| Guimaraes, 2018 (12)        | 847      | 76   | X                       |          | X              |                 | X          | X         |
| Hawatmeh, 2020 (13)         | 664      | 281  | X                       |          | X              | X               | X          |           |
| Higuchi, 2019 (14)          | 12023    | 491  | X                       |          | X              |                 | X          | X         |
| Javed, 2009 (15)            | 143      | 64   | X                       |          | X              | X               |            | X         |
| Kadesjo, 2019 (16)          | 1111     | 251  | X                       |          |                |                 | X          | X         |
| Lambrecht, 2018 (17)        | 360      | 119  | X                       |          | X              | X               |            | X         |
| Landes, 2016 (18)           | 107      | 107  | X                       | X        | X              | X               |            |           |
| Lopez-Cuenca, 2016 (19)     | 707      | 117  | X                       | X        | X              | X               | X          | X         |
| Meigher, 2016 (20)          | 340      | 452  | X                       | X        | X              | X               |            | X         |
| Nestelberger, 2017 (21)     | 684      | 128  | X                       |          | X              |                 | X          | X         |
| Neumann, 2017 (22)          | 188      | 99   | X                       |          | X              | X               |            | X         |
| Paiva, 2015 (23)            | 764      | 236  | X                       |          | X              | X               |            | X         |
| Pandey, 2020 (24)           | 97       | 103  | X                       |          |                |                 |            |           |
| Putot, 2018 (25)            | 2036     | 847  | X                       |          | X              | X               |            | X         |
| Putot, 2019 (26)            | 365      | 254  | X                       |          | X              | X               |            | X         |
| Putot, 2020 (27)            | 3710     | 862  | X                       |          | X              | X               |            | X         |
| Radovanovic, 2017 (28)      | 13828    | 1091 | X                       |          | X              |                 | X          | X         |
| Raphael, 2020 (29)          | 1365     | 1054 | X                       |          | X              | X               | X          | X         |

|                      |      |      |   |   |   |   |   |   |
|----------------------|------|------|---|---|---|---|---|---|
| Reed, 2017 (30)      | 88   | 162  |   |   | X | X | X |   |
| Saaby 2013 (31)      | 397  | 144  | X |   | X | X |   |   |
| Saaby, 2014 (32)     | 360  | 119  | X |   | X | X | X | X |
| Sandoval, 2014 (33)  | 66   | 190  | X | X | X | X |   | X |
| Sandoval, 2017 (34)  | 77   | 140  | X | X | X | X | X | X |
| Sato, 2020 (35)      | 2834 | 155  | X |   | X |   | X | X |
| Shah, 2015 (36)      | 1171 | 429  | X | X | X | X | X | X |
| Singh, 2020 (37)     | 2097 | 1225 | X |   | X |   | X | X |
| Smilowitz, 2018 (38) | 137  | 146  | X | X | X | X | X | X |
| Stein, 2014 (39)     | 2691 | 127  | X | X | X |   | X | X |
| Truong, 2020 (40)    | 275  | 175  | X | X | X |   | X | X |
|                      |      |      |   |   |   |   |   |   |

Table S4. Risk of bias assessment

| Author, Year                | Outcome                          |                          |            |                  |                       | Summary          |
|-----------------------------|----------------------------------|--------------------------|------------|------------------|-----------------------|------------------|
|                             | Representative of Exposed Cohort | Selection of Non-exposed | Assessment | Follow-up Length | Adequacy of Follow-Up |                  |
| Arora, 2018 (1)             | x                                | x                        | x          | x                | x                     | 8 (good quality) |
| Balanescu, 2020 (2)         | 0                                | x                        | x          | 0                | x                     | 6 (fair quality) |
| Baron, 2016 (3)             | x                                | x                        | x          | x                | x                     | 8 (good quality) |
| Bonaca, 2012 (4)            | x                                | x                        | x          | x                | x                     | 8 (good quality) |
| Cediel, 2017 (5)            | x                                | x                        | x          | x                | x                     | 8 (good quality) |
| Chapman, 2018 (6)           | x                                | x                        | x          | x                | x                     | 8 (good quality) |
| Chapman, 2020 (7)           | x                                | x                        | x          | x                | x                     | 8 (good quality) |
| Consuegra-Sanchaz, 2018 (8) | 0                                | 0                        | x          | 0                | 0                     | 3 (poor quality) |
| El-Haddad, 2012 (9)         | x                                | x                        | 0          | 0                | 0                     | 5 (fair quality) |
| Etaher, 2020 (10)           | x                                | x                        | x          | x                | x                     | 8 (good quality) |
| Furie, 2019 (11)            | x                                | x                        | x          | x                | x                     | 8 (good quality) |
| Guimaraes, 2018 (12)        | 0                                | 0                        | x          | 0                | x                     | 4 (fair quality) |
| Hawatmeh, 2020 (13)         | 0                                | 0                        | x          | x                | 0                     | 4 (fair quality) |
| Higuchi, 2019 (14)          | 0                                | 0                        | x          | x                | x                     | 5 (fair quality) |
| Javed, 2009 (15)            | x                                | x                        | x          | x                | x                     | 8 (good quality) |
| Kadesjo, 2019 (16)          | x                                | x                        | x          | x                | x                     | 8 (good quality) |
| Lambrecht, 2018 (17)        | x                                | x                        | x          | x                | x                     | 8 (good quality) |
| Landes, 2016 (18)           | x                                | x                        | x          | x                | x                     | 8 (good quality) |
| Lopez-Cuenca, 2016 (19)     | x                                | x                        | x          | x                | x                     | 8 (good quality) |
| Meigher, 2016 (20)          | x                                | x                        | x          | x                | x                     | 8 (good quality) |
| Nestelberger, 2017 (21)     | x                                | x                        | x          | x                | x                     | 8 (good quality) |
| Neumann, 2017 (22)          | x                                | x                        | x          | x                | x                     | 8 (good quality) |

|                        |   |   |   |   |   |                  |
|------------------------|---|---|---|---|---|------------------|
| Paiva, 2015 (23)       | x | x | x | x | x | 8 (good quality) |
| Pandey, 2020 (24)      | 0 | 0 | 0 | 0 | 0 | 2 (poor quality) |
| Putot, 2018 (25)       | x | x | x | x | x | 8 (good quality) |
| Putot, 2019 (26)       | x | x | 0 | x | x | 7 (good quality) |
| Putot, 2020 (27)       | x | x | x | x | x | 8 (good quality) |
| Radovanovic, 2017 (28) | x | x | x | x | x | 8 (good quality) |
| Raphael, 2020 (29)     | x | x | x | x | x | 8 (good quality) |
| Reed, 2017 (30)        | x | x | x | x | x | 8 (good quality) |
| Saaby 2013 (31)        | x | x | x | x | x | 8 (good quality) |
| Saaby, 2014 (32)       | x | x | x | x | x | 8 (good quality) |
| Sandoval, 2014 (33)    | x | x | x | x | x | 8 (good quality) |
| Sandoval, 2017 (34)    | x | x | x | x | x | 8 (good quality) |
| Sato, 2020 (35)        | 0 | 0 | 0 | x | x | 2 (poor quality) |
| Shah, 2015 (36)        | x | x | x | x | x | 8 (good quality) |
| Singh, 2020 (37)       | 0 | 0 | x | x | x | 6 (fair quality) |
| Smilowitz, 2018 (38)   | x | x | x | x | x | 7 (good quality) |
| Stein, 2014 (39)       | x | x | x | x | x | 7 (good quality) |
| Truong, 2020 (40)      | x | x | x | x | x | 8 (good quality) |

Table S5. Precipitating conditions for T2MI.

| Precipitating Factor                  | Events | Patients | %     |
|---------------------------------------|--------|----------|-------|
| Sepsis                                | 1116   | 3110     | 35.9% |
| Heart failure                         | 698    | 1943     | 35.9% |
| Arrhythmia                            | 1716   | 5465     | 31.4% |
| Anaemia                               | 1506   | 4878     | 30.9% |
| Valvular abnormality                  | 351    | 1301     | 27.0% |
| Respiratory failure                   | 743    | 3021     | 24.6% |
| Chronic obstructive pulmonary disease | 59     | 258      | 22.9% |
| Stroke                                | 44     | 328      | 13.4% |
| Hypertension                          | 291    | 2217     | 13.1% |
| Non-cardiac surgery                   | 103    | 841      | 12.2% |
| Shock/hypotension                     | 291    | 3006     | 9.7%  |
| Renal failure                         | 51     | 553      | 9.2%  |
| Pulmonary oedema                      | 33     | 380      | 8.7%  |
| Bradycardia                           | 35     | 484      | 7.2%  |
| Infection                             | 115    | 2009     | 5.7%  |
| Coronary spasm                        | 36     | 1048     | 3.4%  |
| Bleeding                              | 53     | 1834     | 2.9%  |
| Coronary endothelial dysfunction      | 1      | 592      | 0.2%  |

Table S6. Clinical features on presentation in patients with T2MI versus T1MI patients.

| Presenting Symptom         | T2MI                                 |                          |       | T1MI                                 |                          |       | Odds ratio *<br>[95% CI] |
|----------------------------|--------------------------------------|--------------------------|-------|--------------------------------------|--------------------------|-------|--------------------------|
|                            | No. patients with presenting symptom | Total number of patients | %     | No. patients with presenting symptom | Total number of patients | %     |                          |
| Chest pain                 | 3474                                 | 5932                     | 58.6% | 58273                                | 65883                    | 88.4% | 0.19 [0.13, 0.26]        |
| Dyspnoea                   | 1412                                 | 5210                     | 27.1% | 6930                                 | 65129                    | 10.6% | 2.64 [1.86, 3.74]        |
| Arm or shoulder discomfort | 28                                   | 330                      | 8.5%  | 50                                   | 143                      | 35.0% | 0.18 [0.11, 0.30]        |
| Jaw or neck discomfort     | 6                                    | 140                      | 4.3%  | 12                                   | 77                       | 15.6% | 0.24 [0.09, 0.68]        |
| Epigastric discomfort      | 8                                    | 140                      | 5.7%  | 8                                    | 77                       | 10.4% | 0.52 [0.19, 1.45]        |
| Nausea or vomiting         | 46                                   | 330                      | 13.9% | 39                                   | 143                      | 27.3% | 0.46 [0.28, 0.74]        |
| Fatigue                    | 5                                    | 140                      | 3.6%  | 5                                    | 77                       | 6.5%  | 0.53 [0.15, 1.90]        |
| Diaphoresis                | 16                                   | 140                      | 11.4% | 16                                   | 77                       | 20.8% | 0.49 [0.23, 1.05]        |
| Other nonspecific symptoms | 988                                  | 1529                     | 64.6% | 2662                                 | 41396                    | 6.4%  | 4.9 [0.48, 50.33]        |
| Collapse / syncope         | 99                                   | 2125                     | 4.7%  | 157                                  | 7152                     | 2.2%  | 2.10 [1.05, 4.18]        |

\*Comparing T2MI with T1MI patients, with odds ratio adjusted according to study weighting using random effects meta-analysis

Abbreviations: URL- upper reference limit; STEMI- ST elevation myocardial infarction; NSTEMI- Non- ST elevation myocardial infarction; MI- Myocardial infarction; cTn- cardiac troponin; T1MI- Type 1 myocardial infarction; T2MI- Type 2 myocardial infarction; ECG- electrocardiogram; CAD- coronary artery disease; PCI- percutaneous coronary intervention; CABG- coronary artery bypass graft; IHD- ischaemic heart disease; MACE- Major adverse cardiovascular events; CI- confidence interval

1  
2  
3  
4  
5  
6  
7  
8  
9  
10  
11  
12  
13  
14  
15  
16  
17  
18  
19  
20  
21  
22  
23  
24  
25  
26  
27  
28  
29  
30  
31  
32  
33  
34  
35  
36  
37  
38  
39  
40  
41  
42  
43  
44  
45  
46  
47  
48  
49  
50  
51  
52  
53  
54  
55  
56  
57  
58  
59  
60

| Variable                                                                                                                                                                                                                                                                                      | T2MI                                            |                    |       | T1MI                                            |                      |       | Odds ratio*<br>(95% CI) |
|-----------------------------------------------------------------------------------------------------------------------------------------------------------------------------------------------------------------------------------------------------------------------------------------------|-------------------------------------------------|--------------------|-------|-------------------------------------------------|----------------------|-------|-------------------------|
|                                                                                                                                                                                                                                                                                               | No. patients with nominated diagnostic findings | Total no. patients | %     | No. patients with nominated diagnostic findings | Total no of patients | %     |                         |
| <b>ECG</b>                                                                                                                                                                                                                                                                                    |                                                 |                    |       |                                                 |                      |       |                         |
| ST elevation                                                                                                                                                                                                                                                                                  | 1129                                            | 8014               | 14.1% | 37182                                           | 84096                | 44.2% | 0.22 [0.17, 0.28]       |
| ST depression or T wave Inversion                                                                                                                                                                                                                                                             | 1728                                            | 4911               | 35.2% | 10968                                           | 51042                | 21.5% | 1.36 [0.85, 2.17]       |
| Pathological Q Waves                                                                                                                                                                                                                                                                          | 30                                              | 447                | 6.7%  | 177                                             | 850                  | 20.8% | 0.38 [0.20, 0.71]       |
| Non-specific ST-T wave changes                                                                                                                                                                                                                                                                | 146                                             | 592                | 24.7% | 45                                              | 417                  | 10.8% | 2.62 [1.81, 3.79]       |
| Left bundle branch block                                                                                                                                                                                                                                                                      | 175                                             | 1927               | 9.1%  | 1943                                            | 42543                | 4.6%  | 1.62 [1.21, 2.17]       |
| Atrial fibrillation/flutter                                                                                                                                                                                                                                                                   | 54                                              | 257                | 21%   | 52                                              | 784                  | 6.6%  | 4.99 [3.14, 7.93]       |
| <b>Echocardiograph</b>                                                                                                                                                                                                                                                                        |                                                 |                    |       |                                                 |                      |       |                         |
| Echocardiogram performed                                                                                                                                                                                                                                                                      | 648                                             | 1353               | 47.9% | 1571                                            | 2830                 | 55.5% | 0.44 [0.20, 0.96]       |
| Presence of RWMA                                                                                                                                                                                                                                                                              | 97                                              | 286                | 33.9% | 101                                             | 214                  | 47.2% | 0.48 [0.06, 3.78]       |
| <b>Angiogram</b>                                                                                                                                                                                                                                                                              |                                                 |                    |       |                                                 |                      |       |                         |
| Angiogram performed                                                                                                                                                                                                                                                                           | 3182                                            | 9318               | 34.1% | 42724                                           | 49944                | 85.5% | 0.09 [0.06, 0.12]       |
| Obstructive coronary artery disease present                                                                                                                                                                                                                                                   | 1246                                            | 3663               | 34.0% | 19923                                           | 44404                | 44.9% | 0.16 [0.05, 0.54]       |
| Multivessel disease present                                                                                                                                                                                                                                                                   | 593                                             | 2147               | 27.6% | 11839                                           | 41715                | 28.4% | 0.40 [0.19, 0.82]       |
| *Comparing T2MI with T1MI patients, with odds ratio adjusted according to study weighting using random effects meta-analysis<br>ECG=electrocardiograph; RWMA=regional wall motion abnormalities; CI=confidence interval; T2MI=type 2 myocardial infarction; T1MI=type 1 myocardial infarction |                                                 |                    |       |                                                 |                      |       |                         |



Table S8. Troponin measurements.

| Troponin Measurement | Number of Studies | T1MI (min-max) | T2MI (min-max) |
|----------------------|-------------------|----------------|----------------|
| Baseline cTn (xULN)  | 12                | 0.14-190       | 0.1-8.2        |
| 6h cTn (xULN)        | 4                 | 13.2-142       | 4.25-11        |
| Peak cTn (xULN)      | 20                | 5.1-1703       | 2.8-447        |

Abbreviations: xULN= times upper limit normal

Figure S1. PRISMA flow diagram.

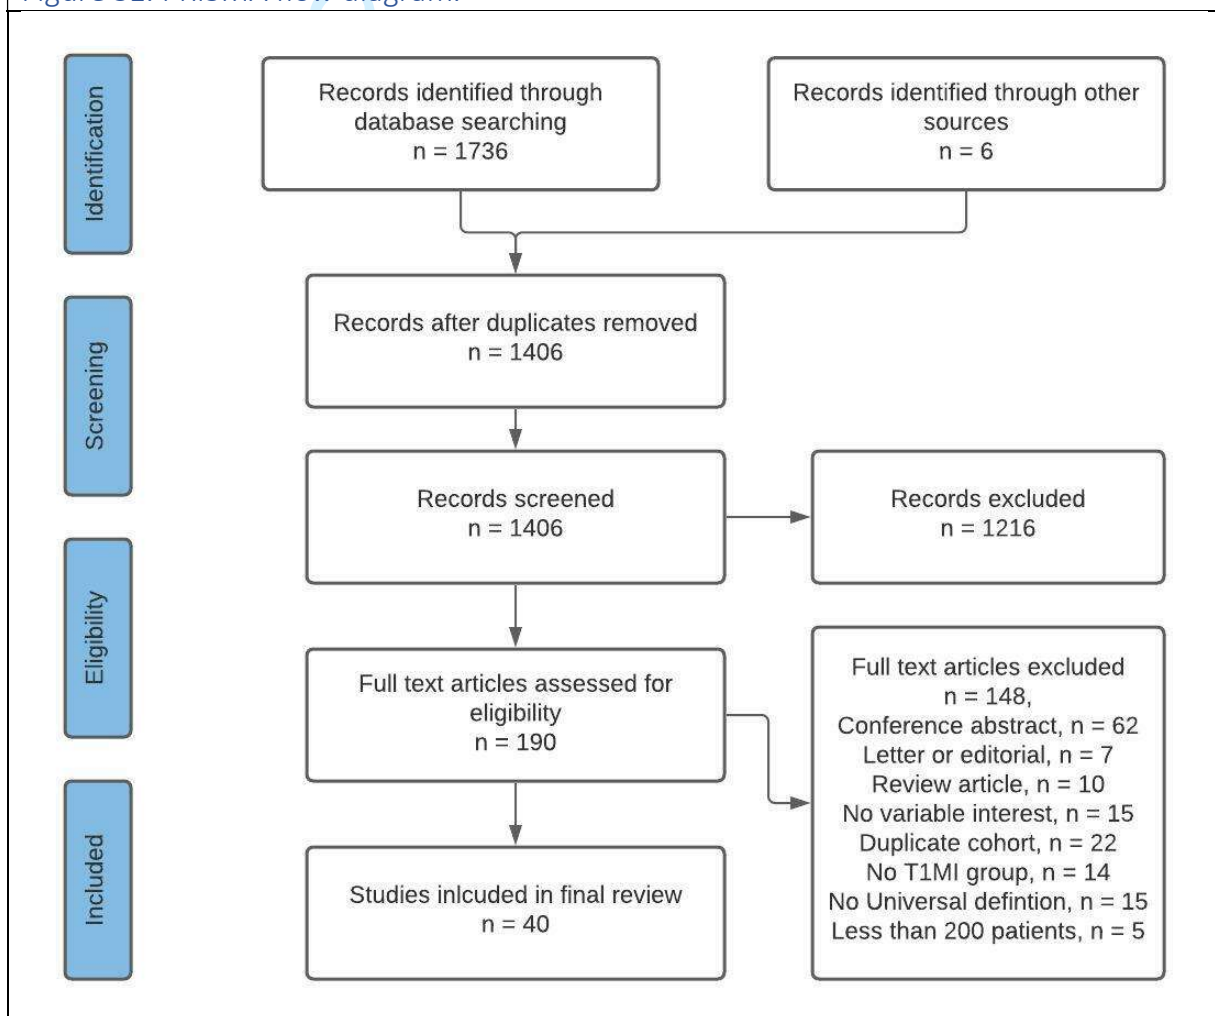

Figure S2. Forest Plot. Presence of Ischaemic Heart Disease.

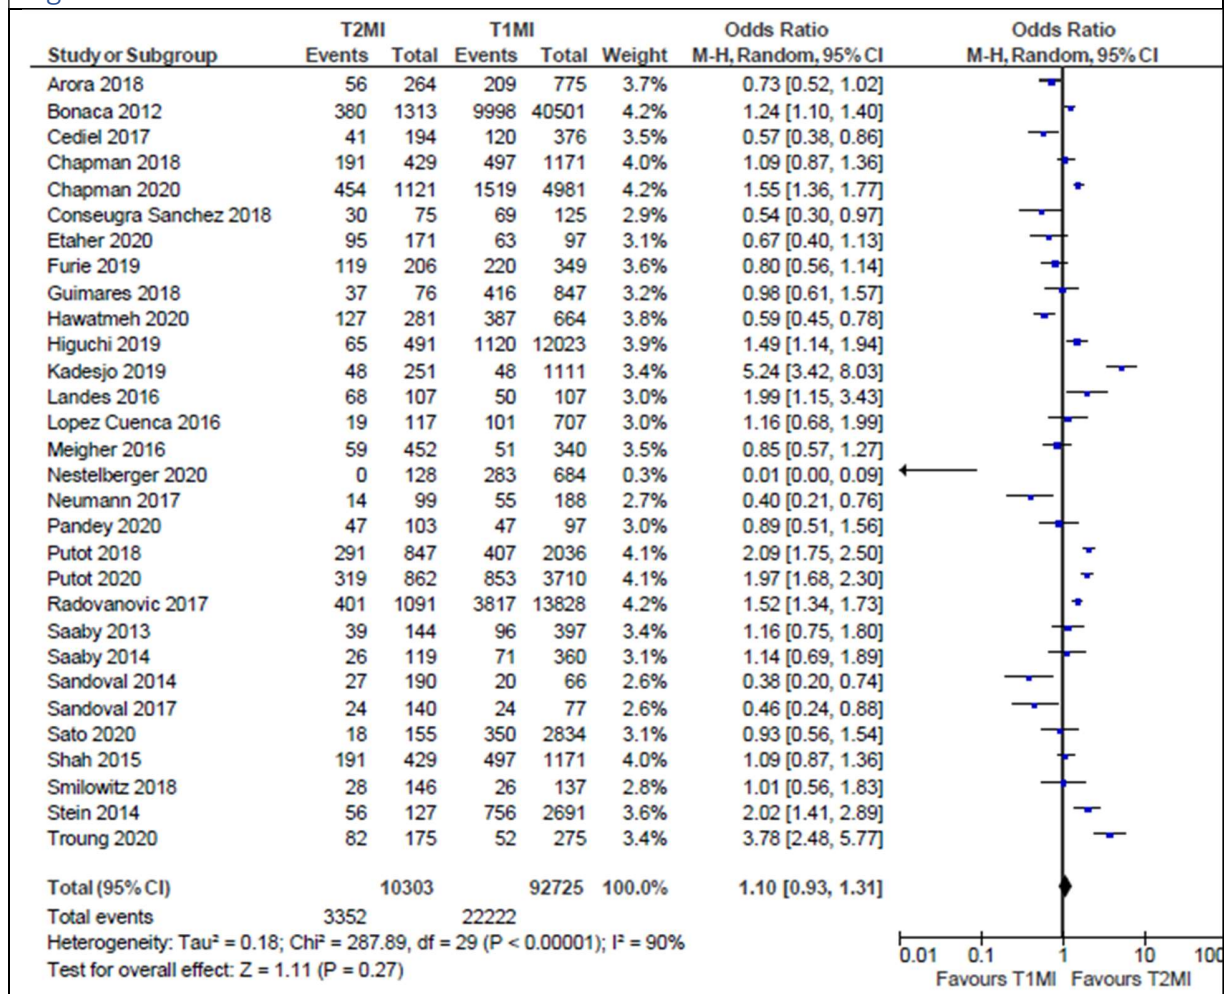

Figure S3. Forest Plot. Presence of Type 2 Diabetes Mellitus.



Figure S4. Forest Plot. Presence of Hypertension.

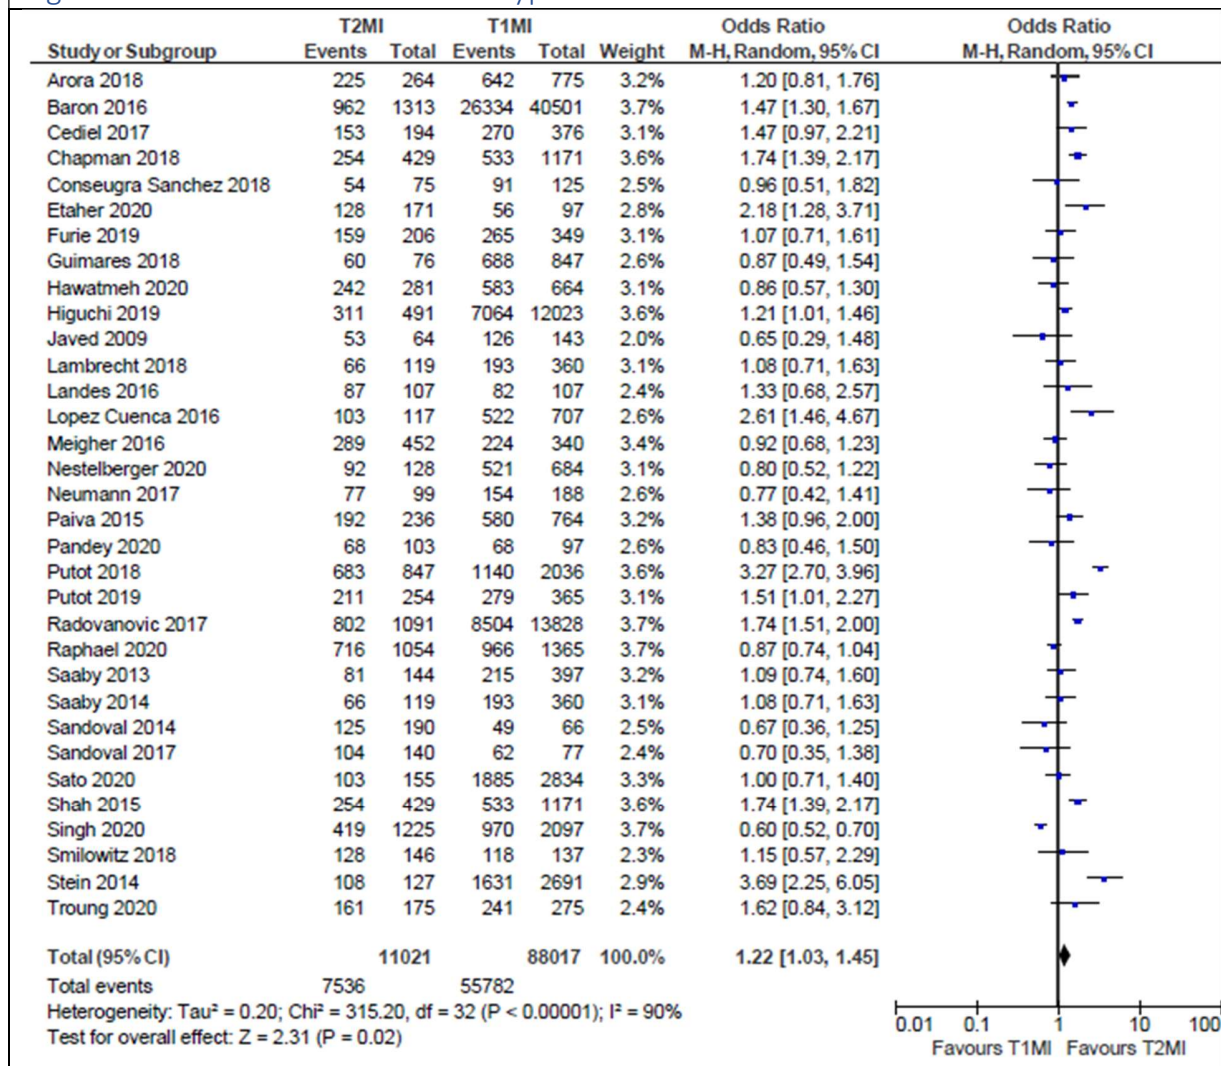

Figure S5. Forest Plot. Presence of Dyslipidaemia.

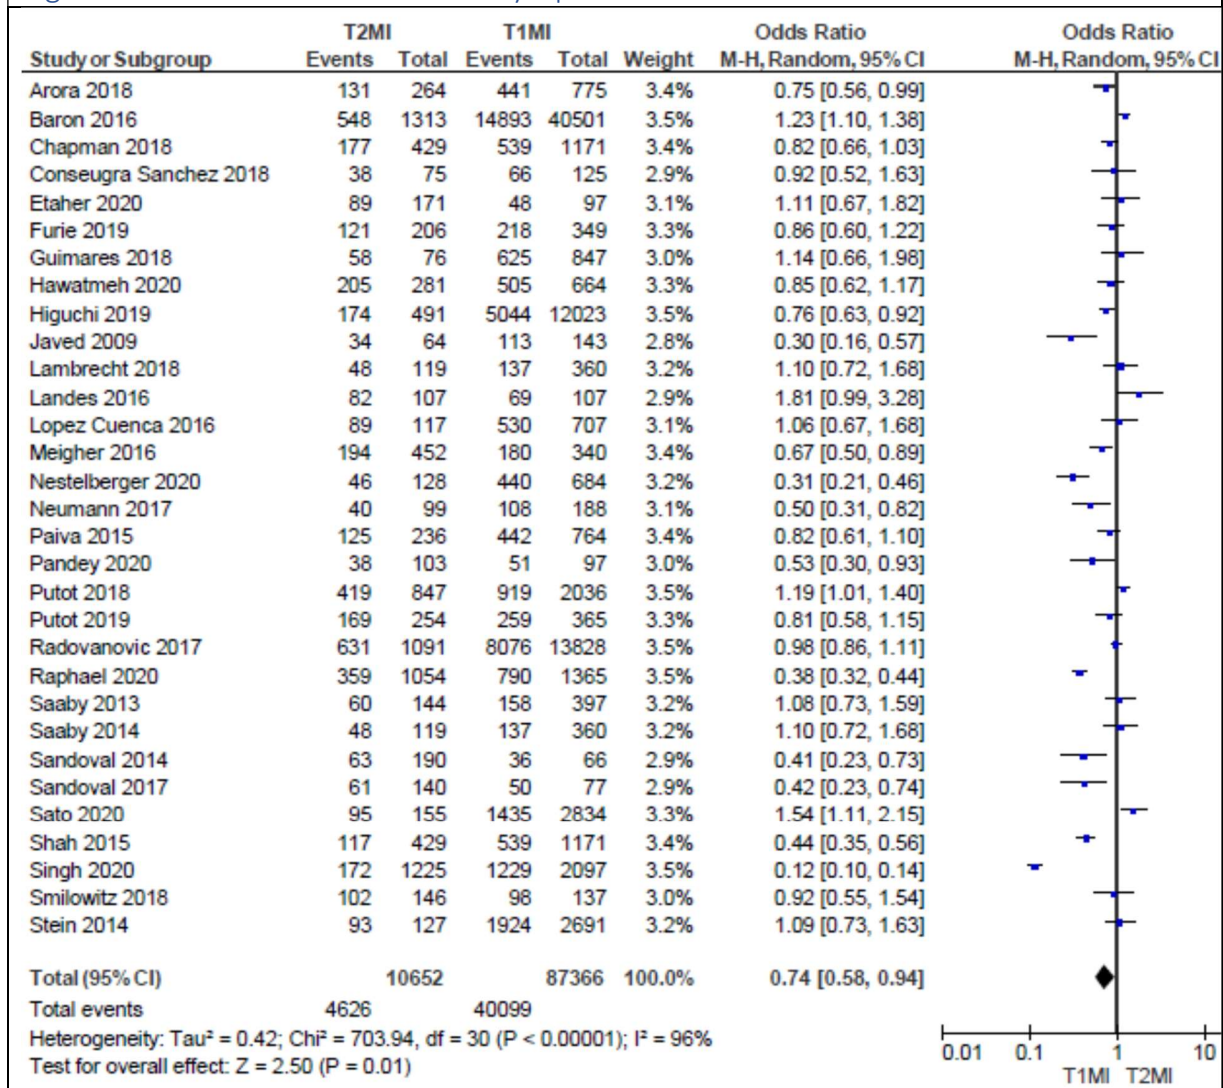

Figure S6. Forest Plot. Smoking Status.

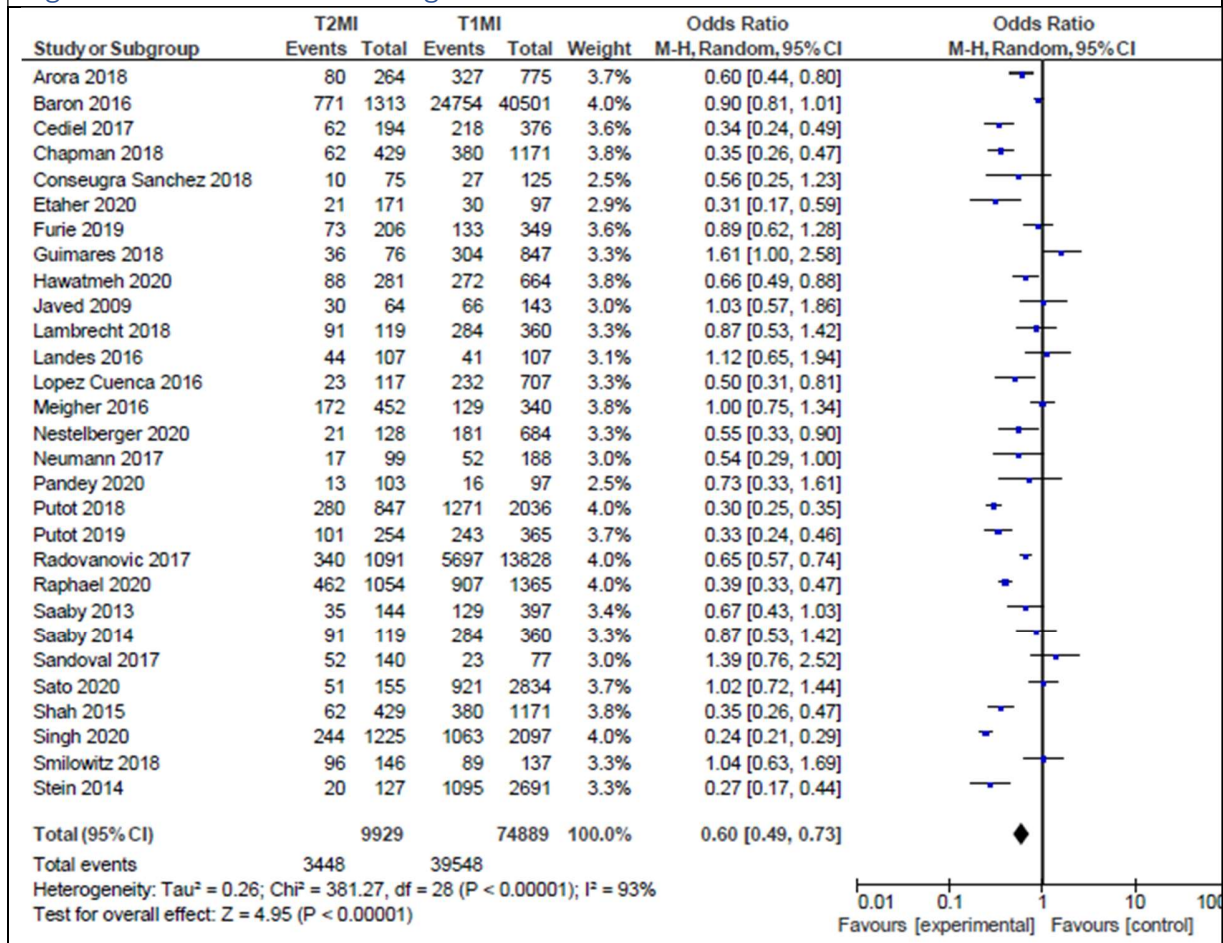

Figure S7. Forest Plot. Obesity Status.

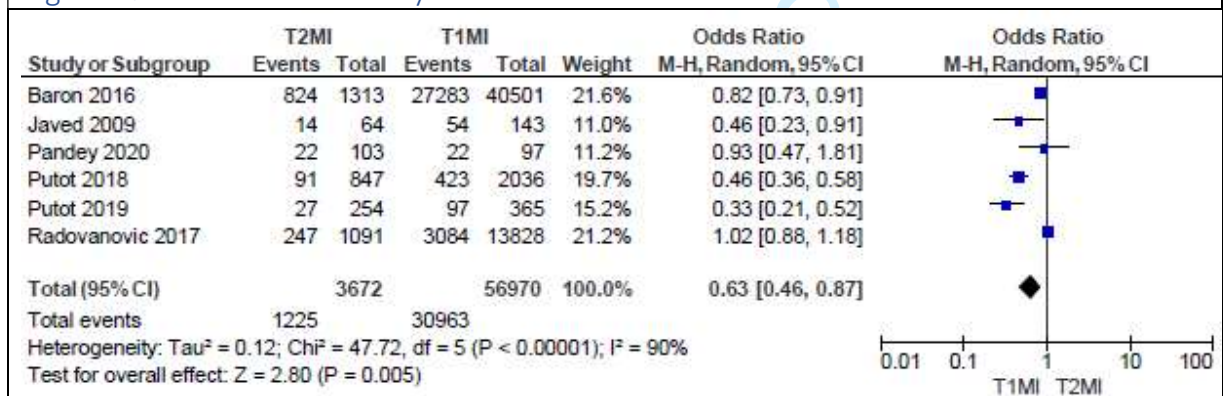

Figure S8. Forest Plot. Presence of Chronic Kidney Disease.

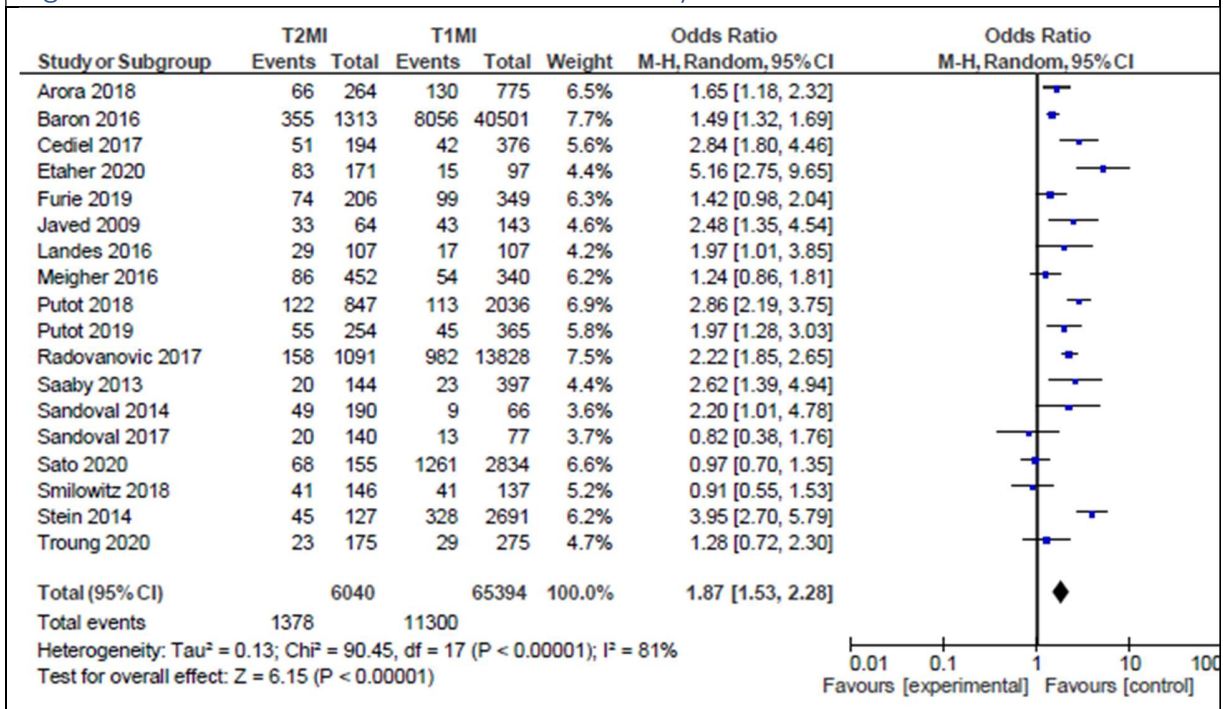

Figure S9. Forest Plot. Presence of Heart Failure.

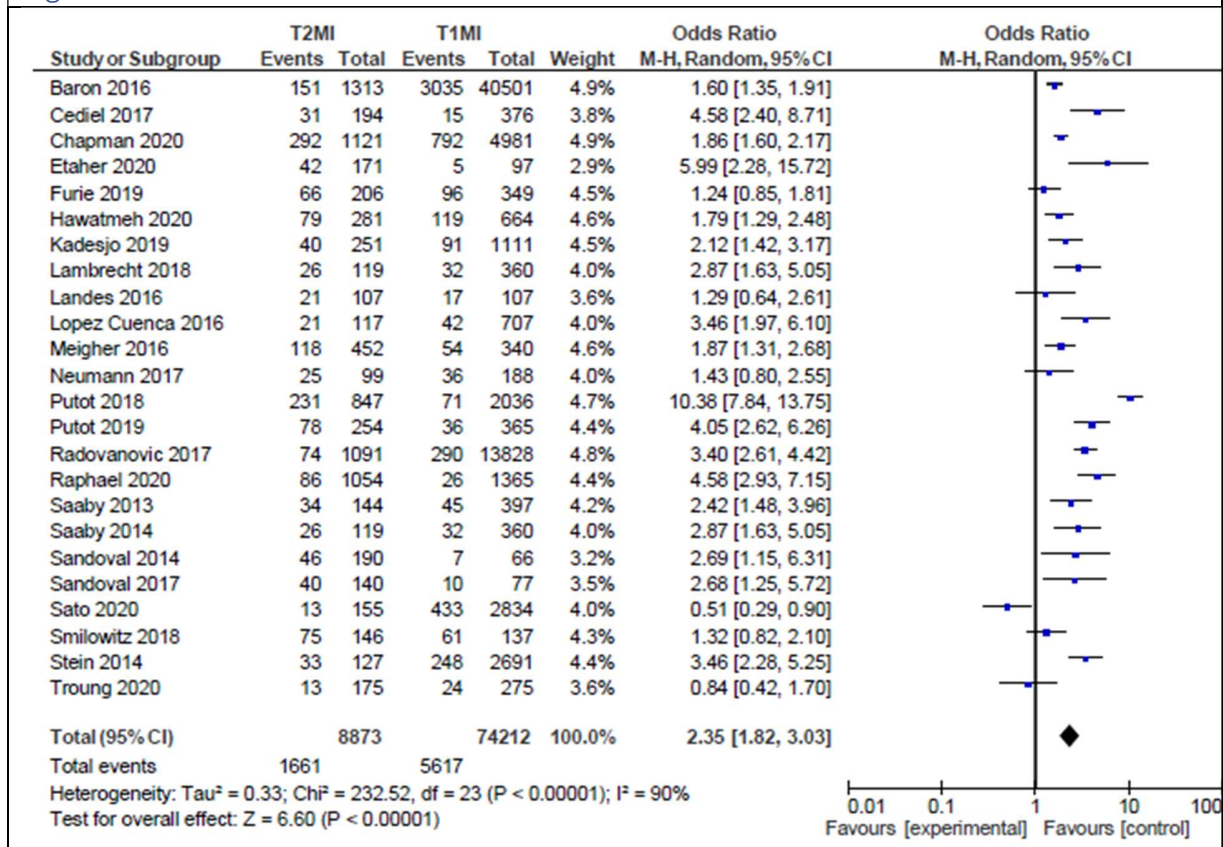



Figure S10. Forest Plot. Presence of Peripheral Vascular Disease.

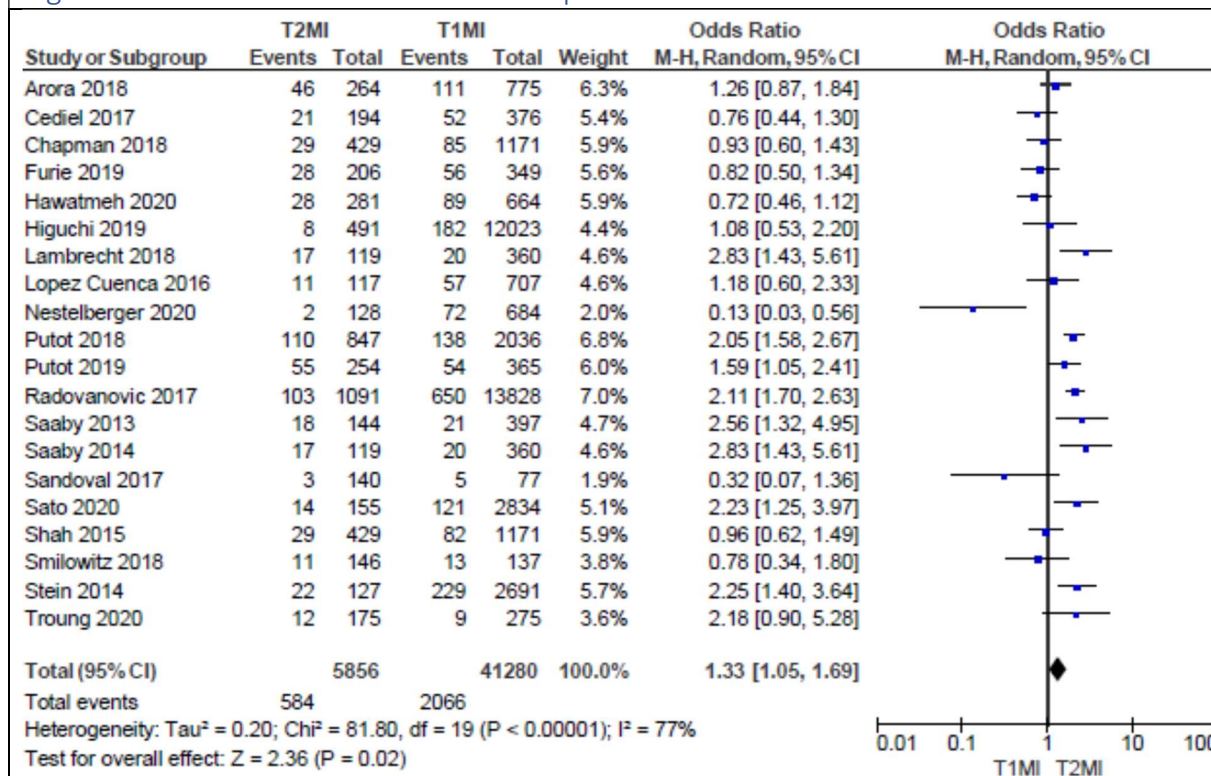

Figure S11. Forest Plot. Presence of Cerebrovascular Disease.

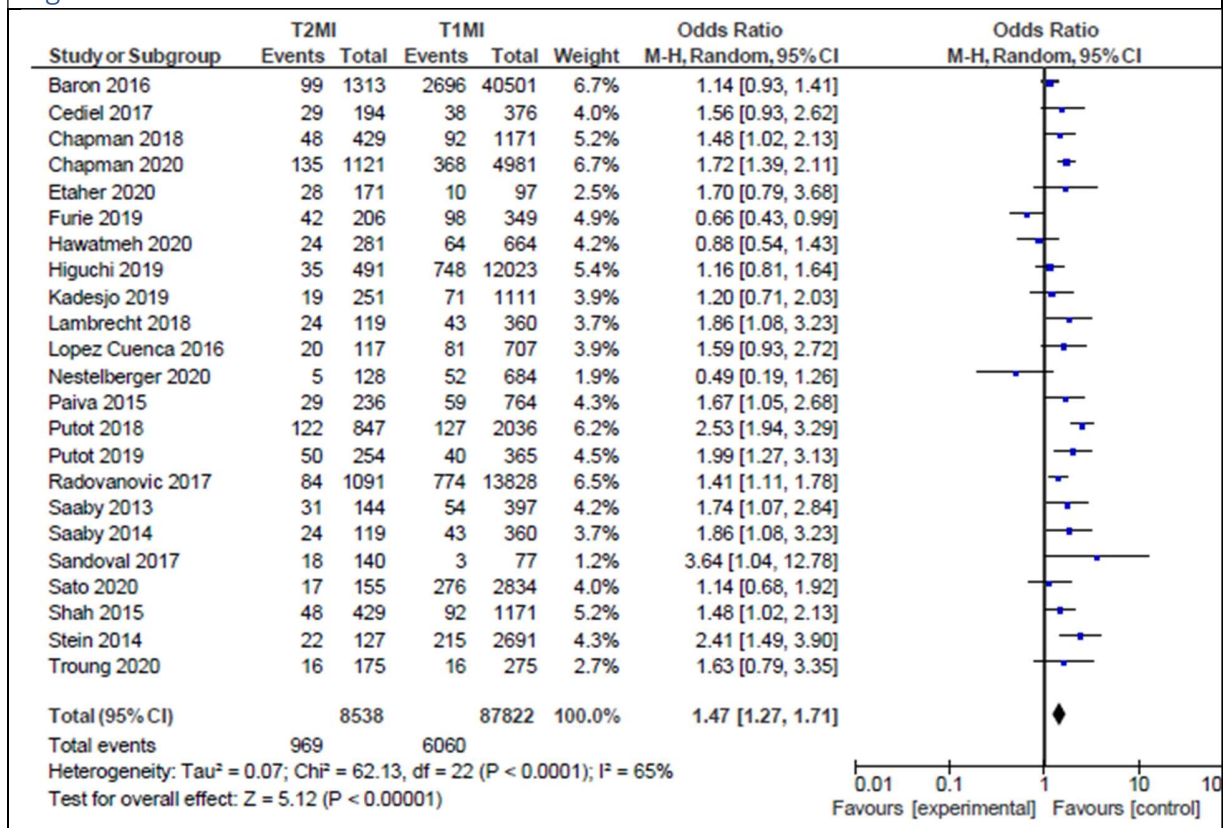

Figure S12. Forest Plot. Presence of Illicit Drug Use.

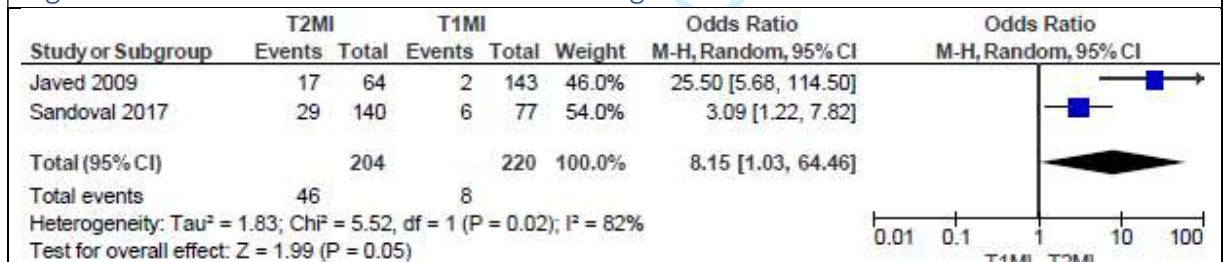

Figure S13. Forest Plot. Presence of Atrial Fibrillation.

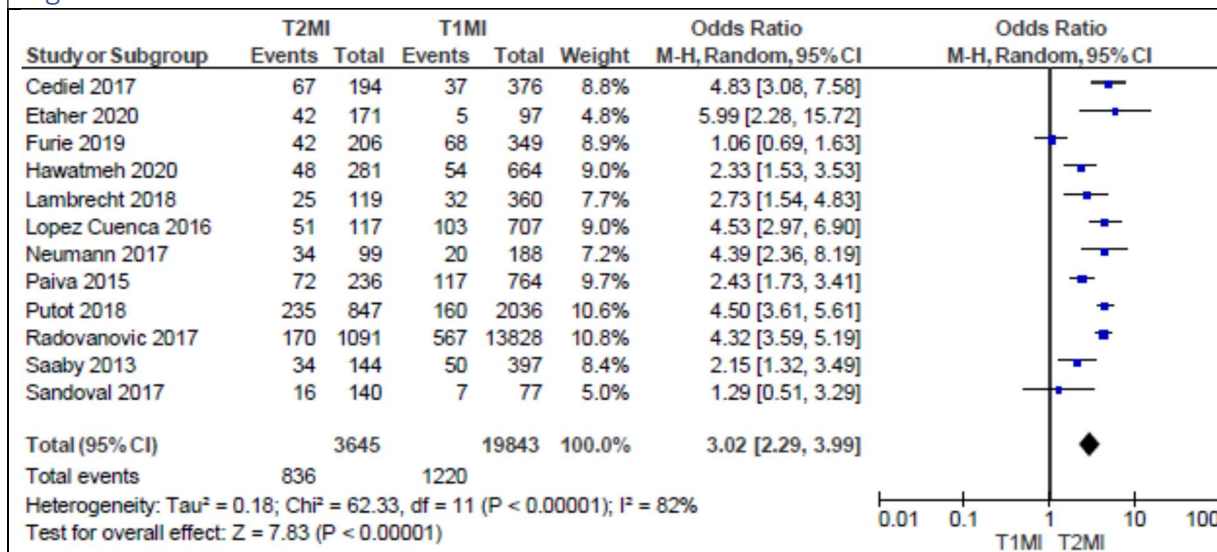

Figure S14. Forest Plot. Chest Pain as Presenting Feature.

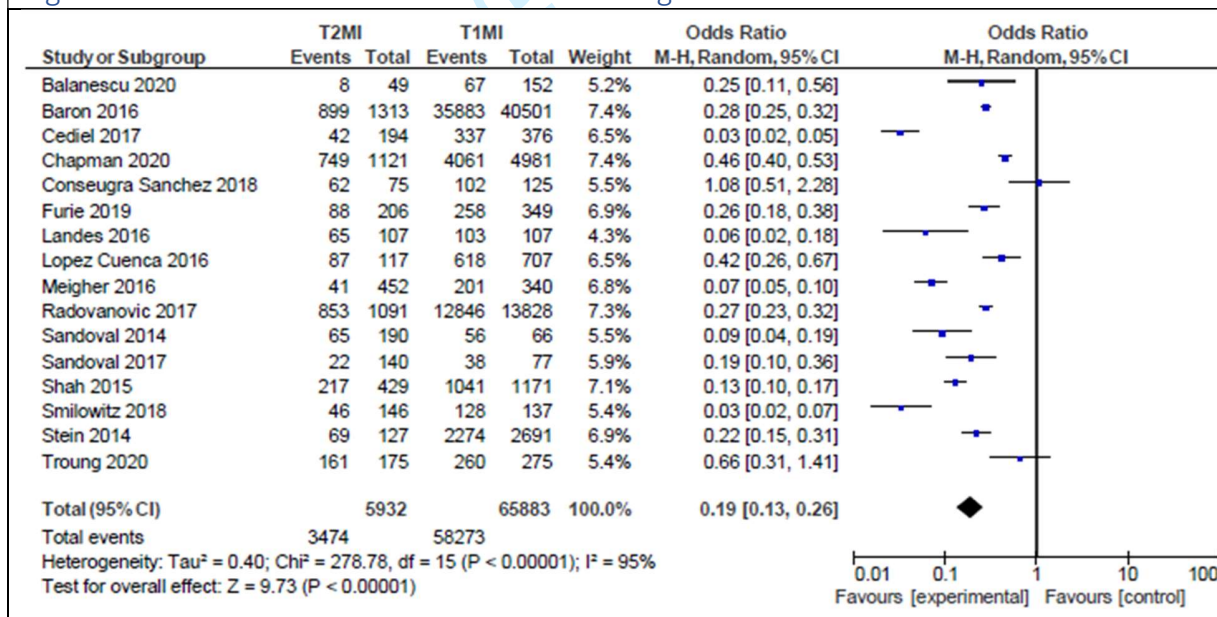

Figure S15. Forest Plot. Dyspnoea as Presenting Feature.

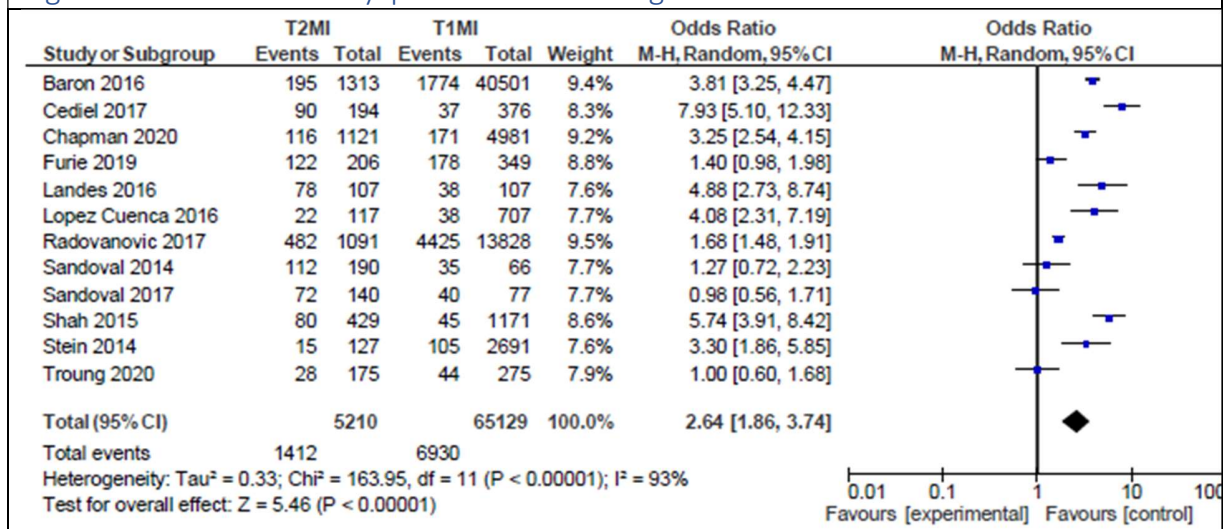

Figure S16. Forest Plot. Arm / Shoulder Discomfort as Presenting Feature.

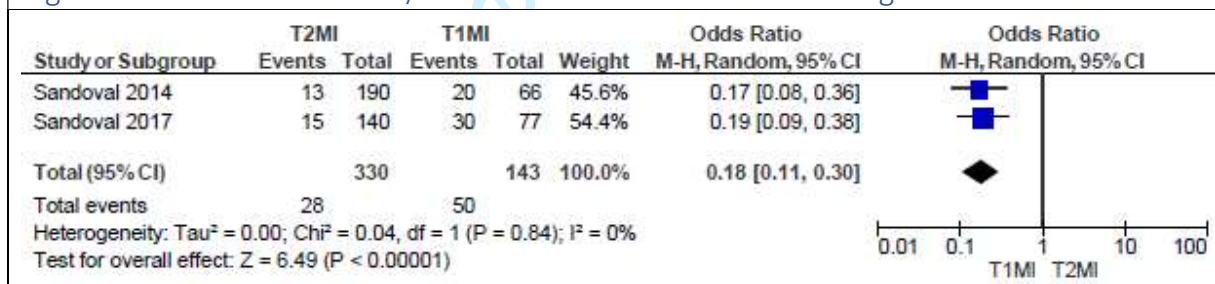

Figure S17. Forest Plot. Nausea / Vomiting as Presenting Feature.

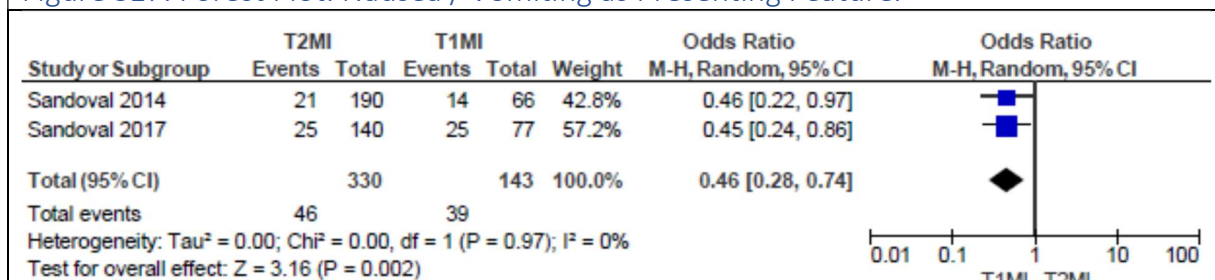

Figure S18. Forest Plot. Non-specific Symptoms as Presenting Features.

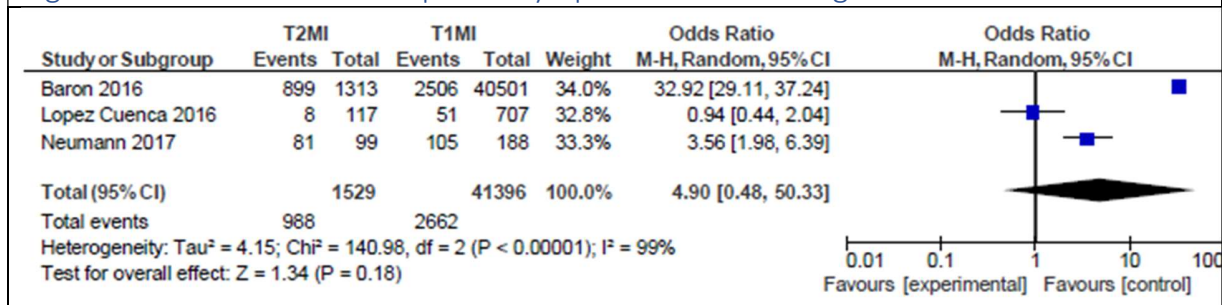

Figure S19. Forest Plot. Collapse / Syncope as Presenting Features.

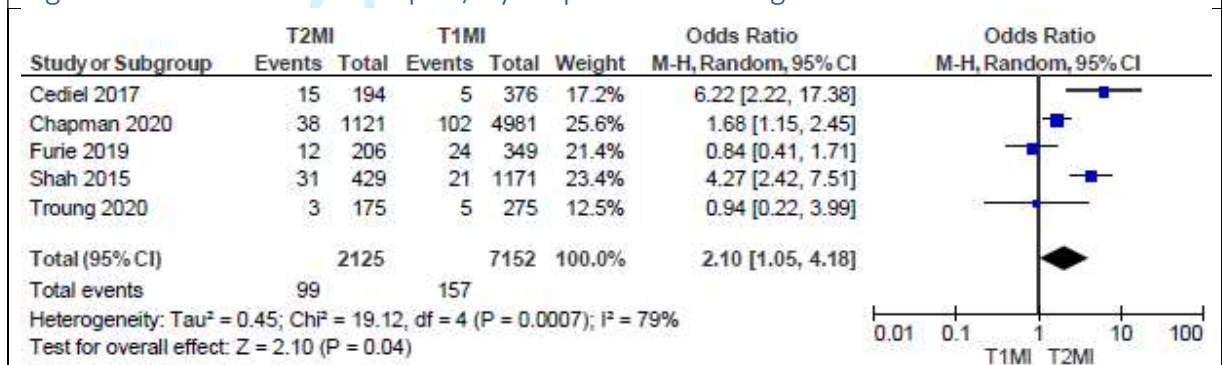

Figure S20. Forest Plot. ST Elevation on ECG.

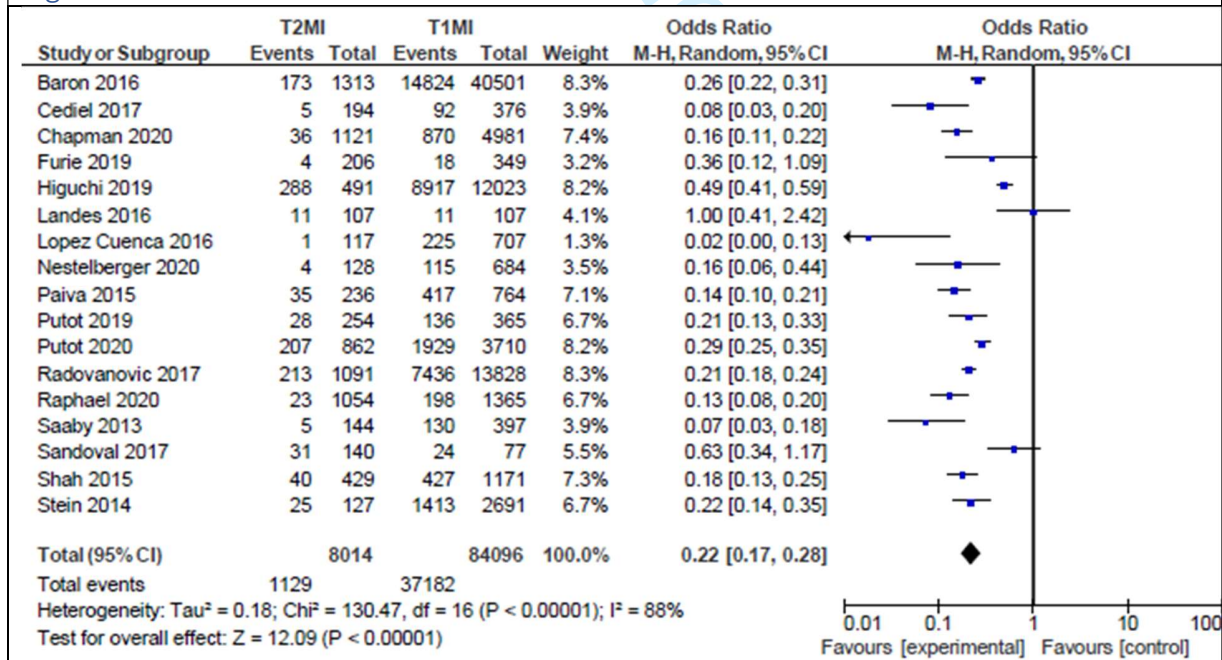

Figure S21. Forest Plot. ST Depression or T Wave Inversion on ECG.

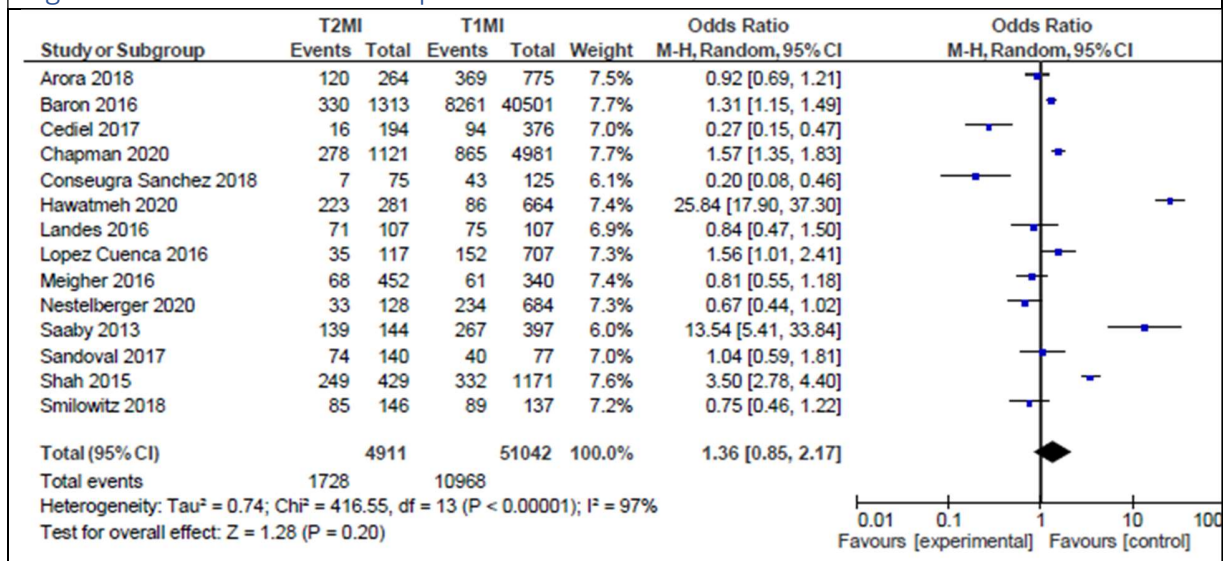

Figure S22. Forest Plot. Q Waves on ECG.

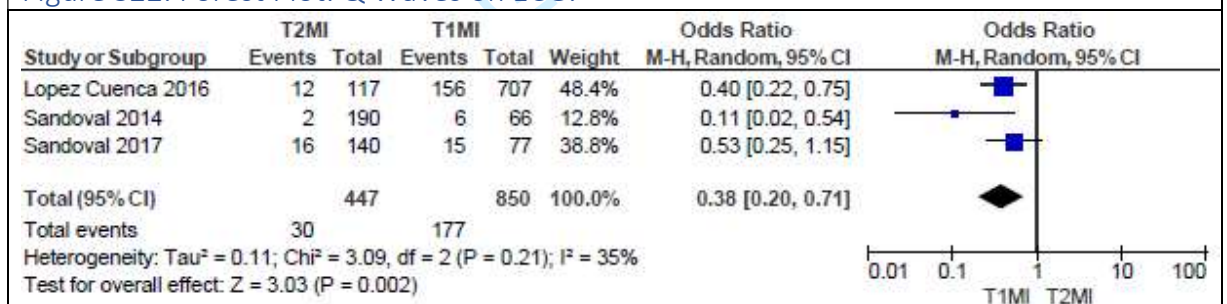

Figure S23. Forest Plot. Non-specific ST Changes on ECG.

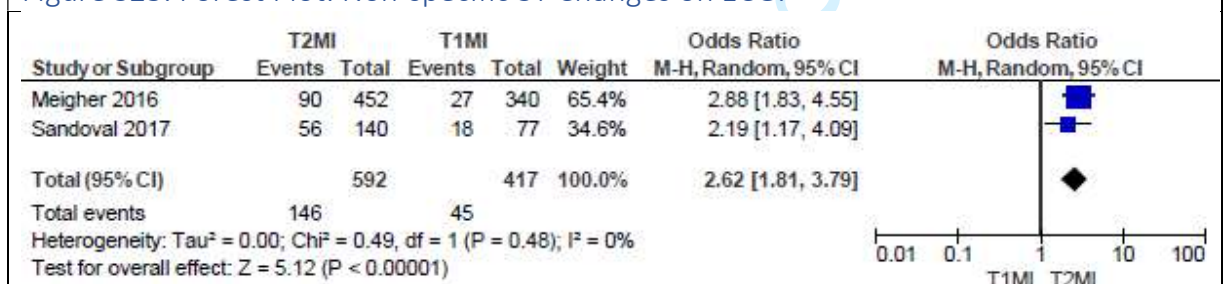

Figure S24. Forest Plot. Left Bundle Branch Block on ECG.

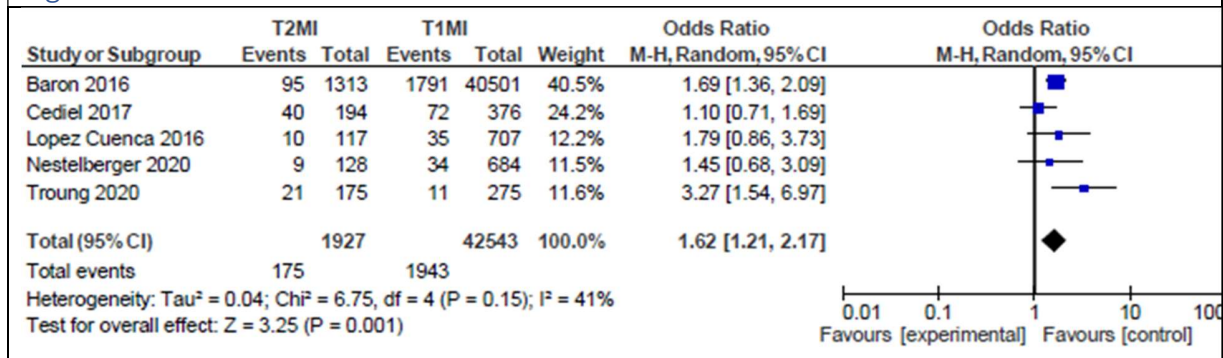

Figure S25. Forest Plot. Atrial Fibrillation on ECG.

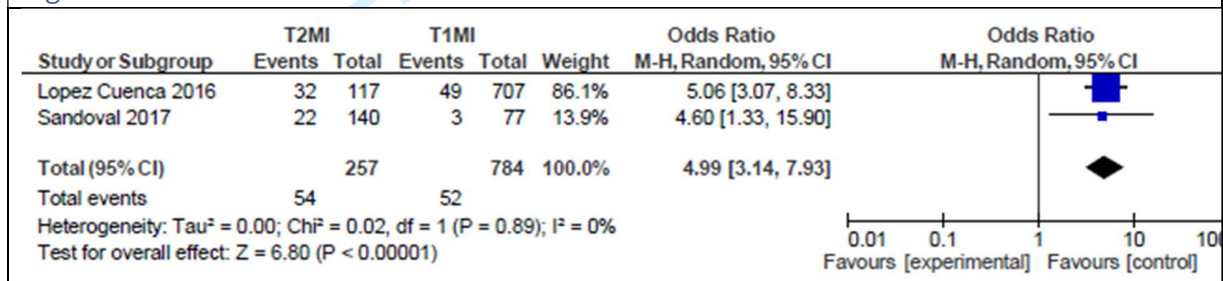

Figure S26. Forest Plot. Coronary Angiogram Performed.

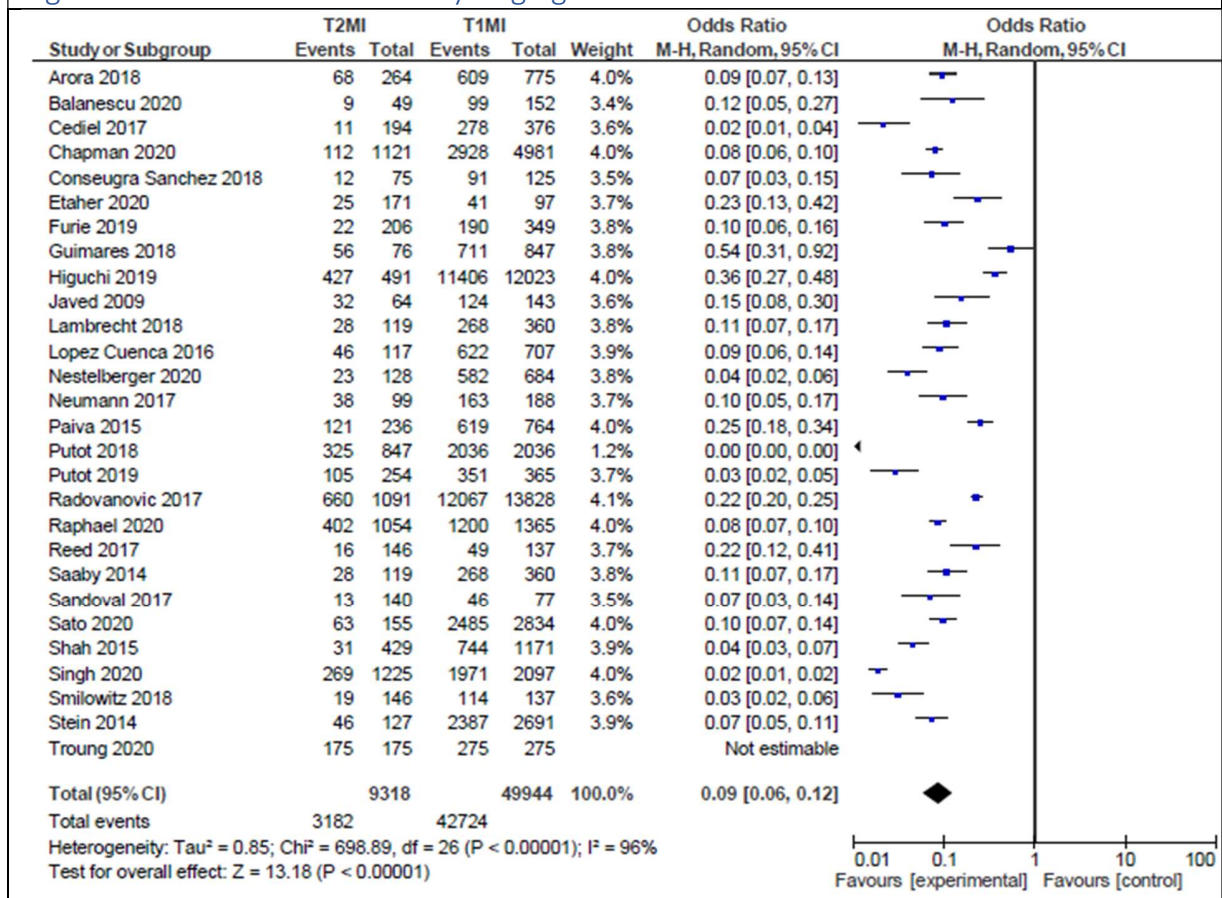

Figure S27. Forest Plot. Obstructive Coronary Artery Disease on Coronary Angiogram.

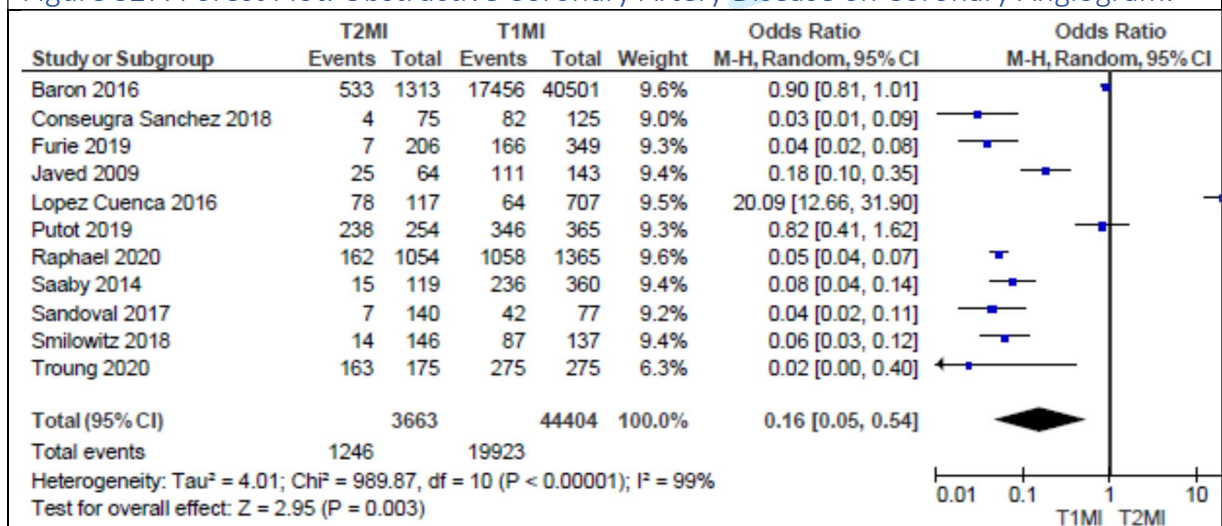



Figure S28. Forest Plot. Multivessel Disease on Coronary Angiogram.

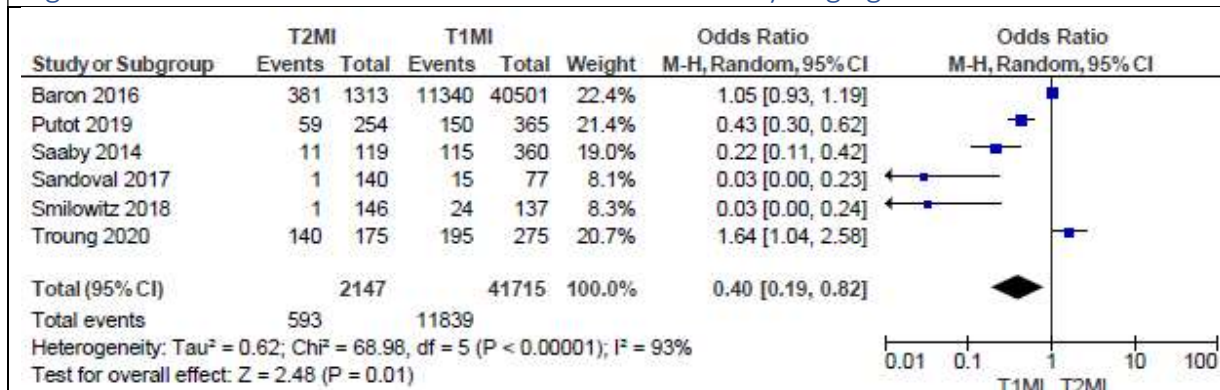

Figure S29. Forest Plot. Echocardiogram Performed.

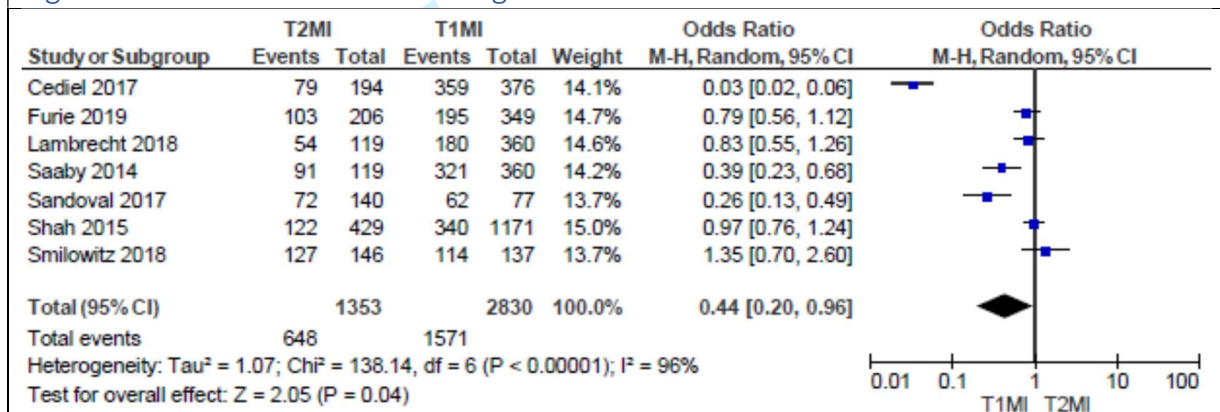

Figure S30. Forest Plot. Regional Wall Motion Abnormalities on Echocardiogram.

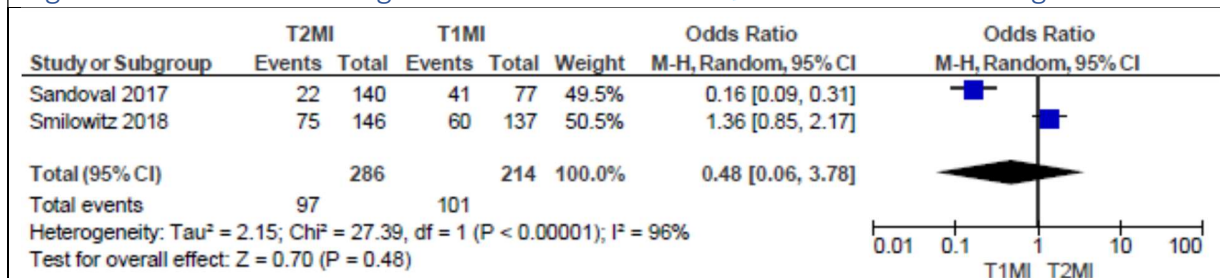

Figure S31. Forest Plot. Beta-Blockers Prescribed.

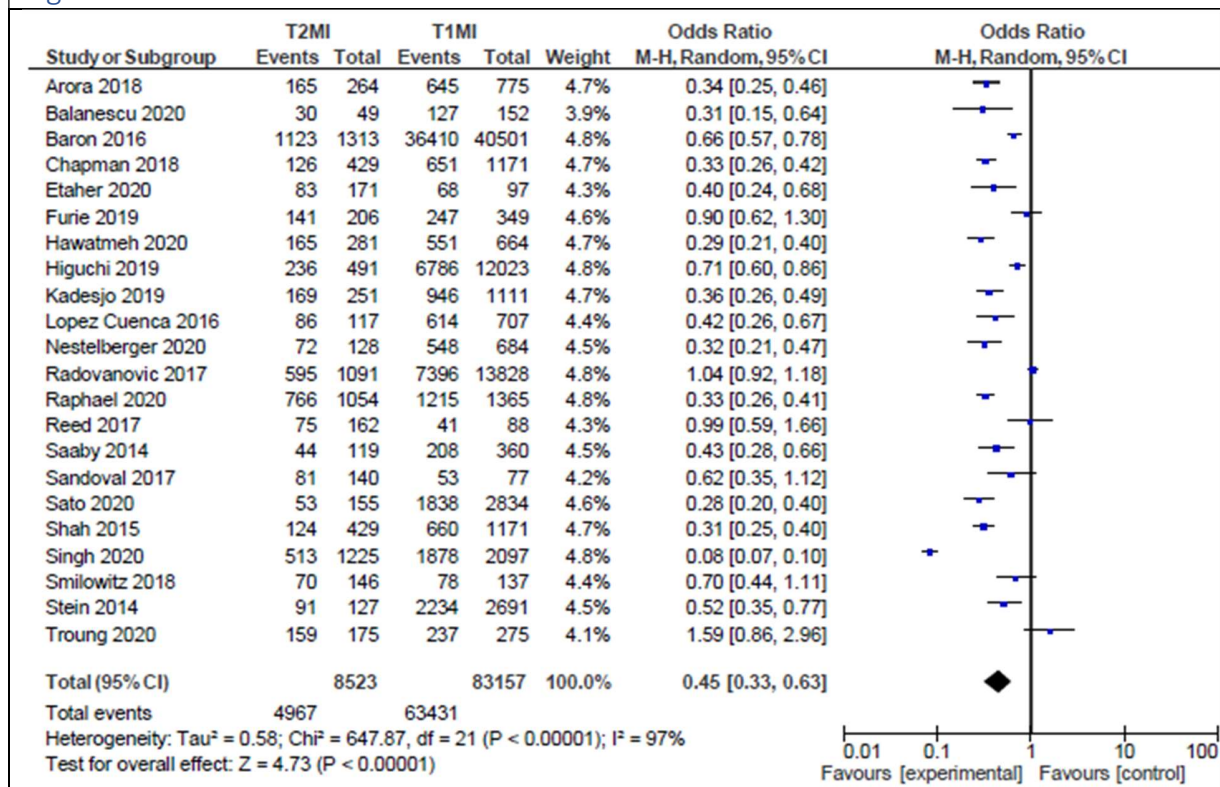

Figure S32. Forest Plot. ACEi/ARB Prescribed.

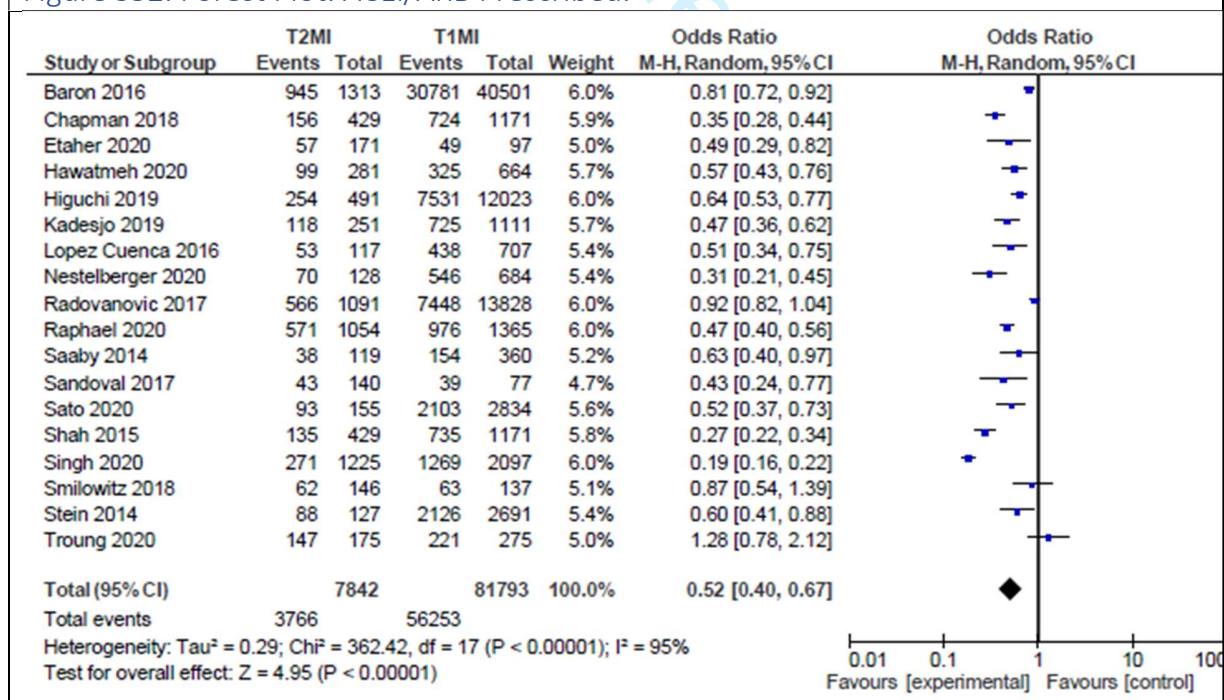

Figure S33. Forest Plot. Antiplatelets Prescribed.

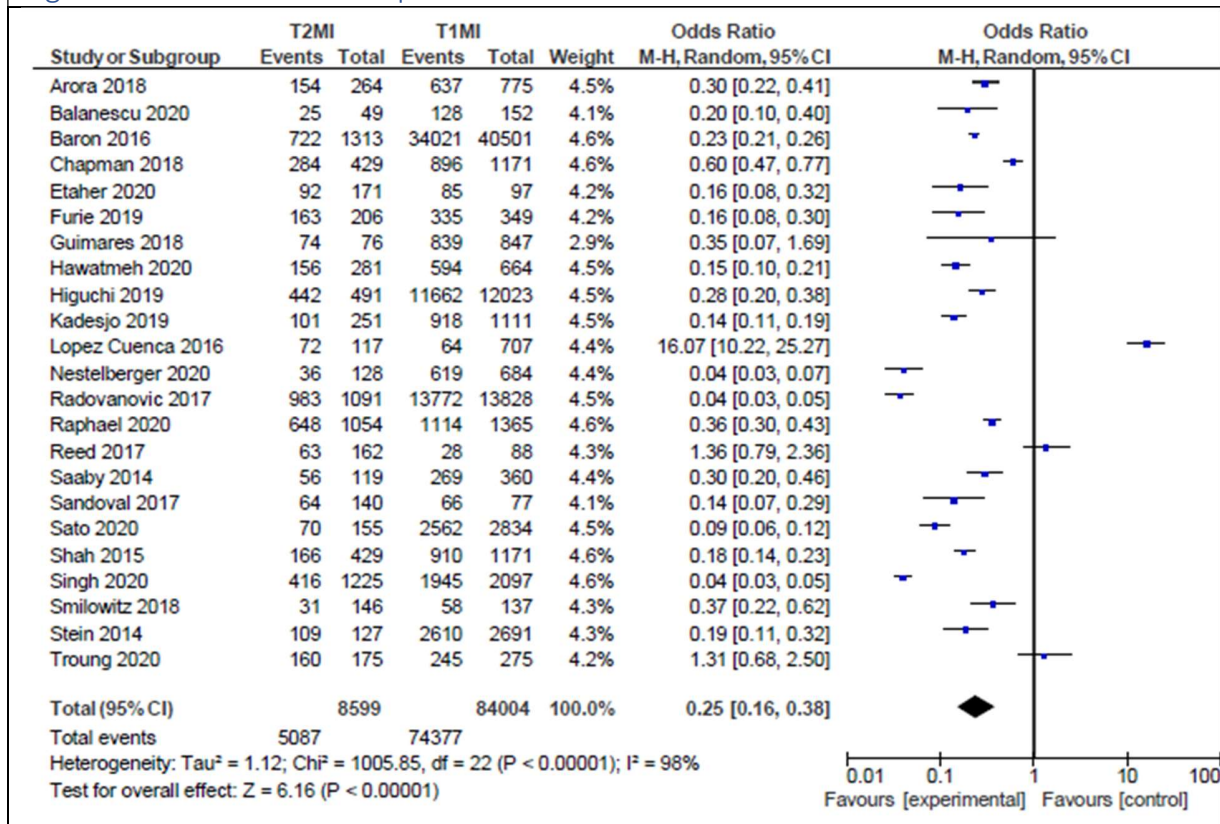

Figure S34. Forest Plot. Anticoagulants Prescribed.

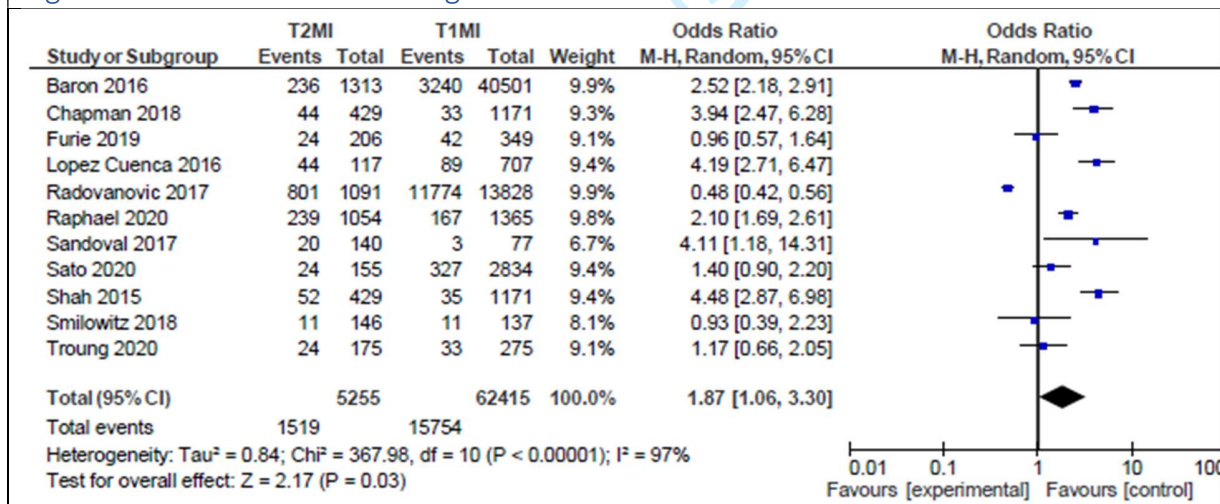

Figure S35. Forest Plot. Antianginal Drugs Prescribed.

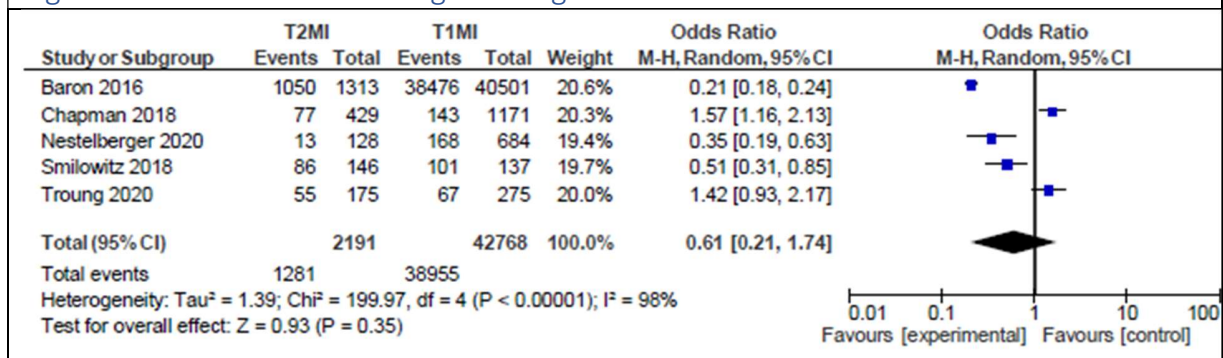

Figure S36. Forest Plot. Diuretics Prescribed.

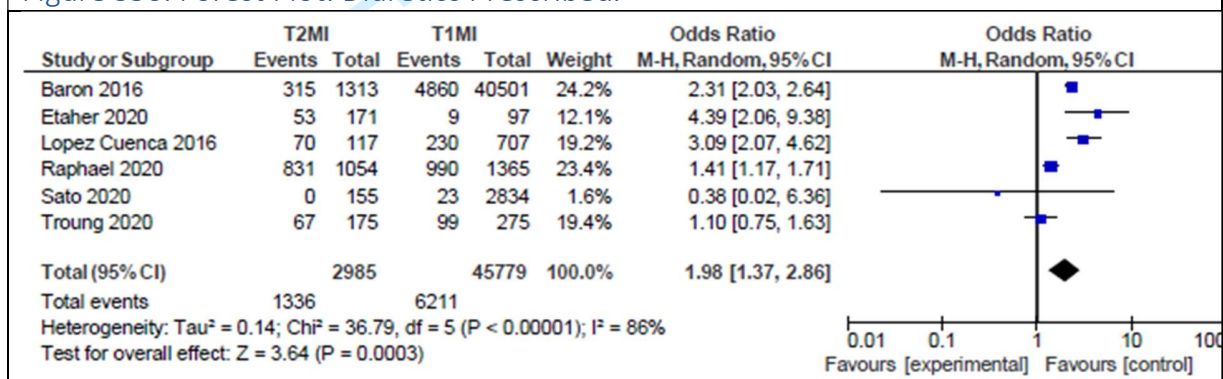

Figure S37. Forest Plot. Statins Prescribed.

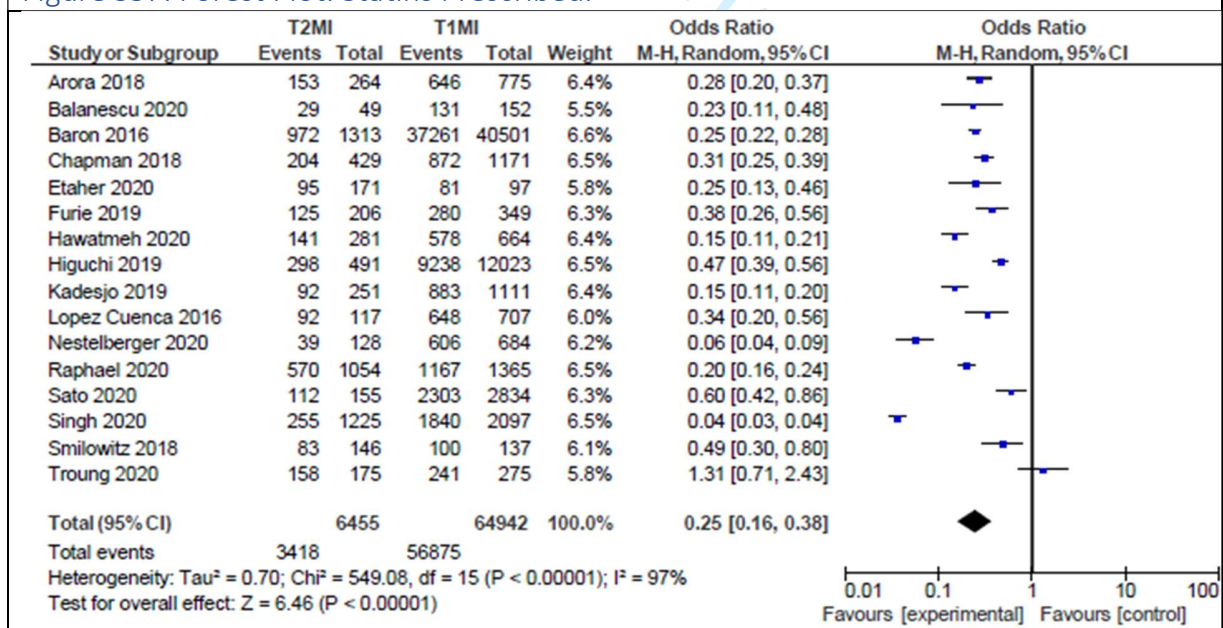

Figure S38. Forest Plot. Percutaneous Coronary Intervention Performed.

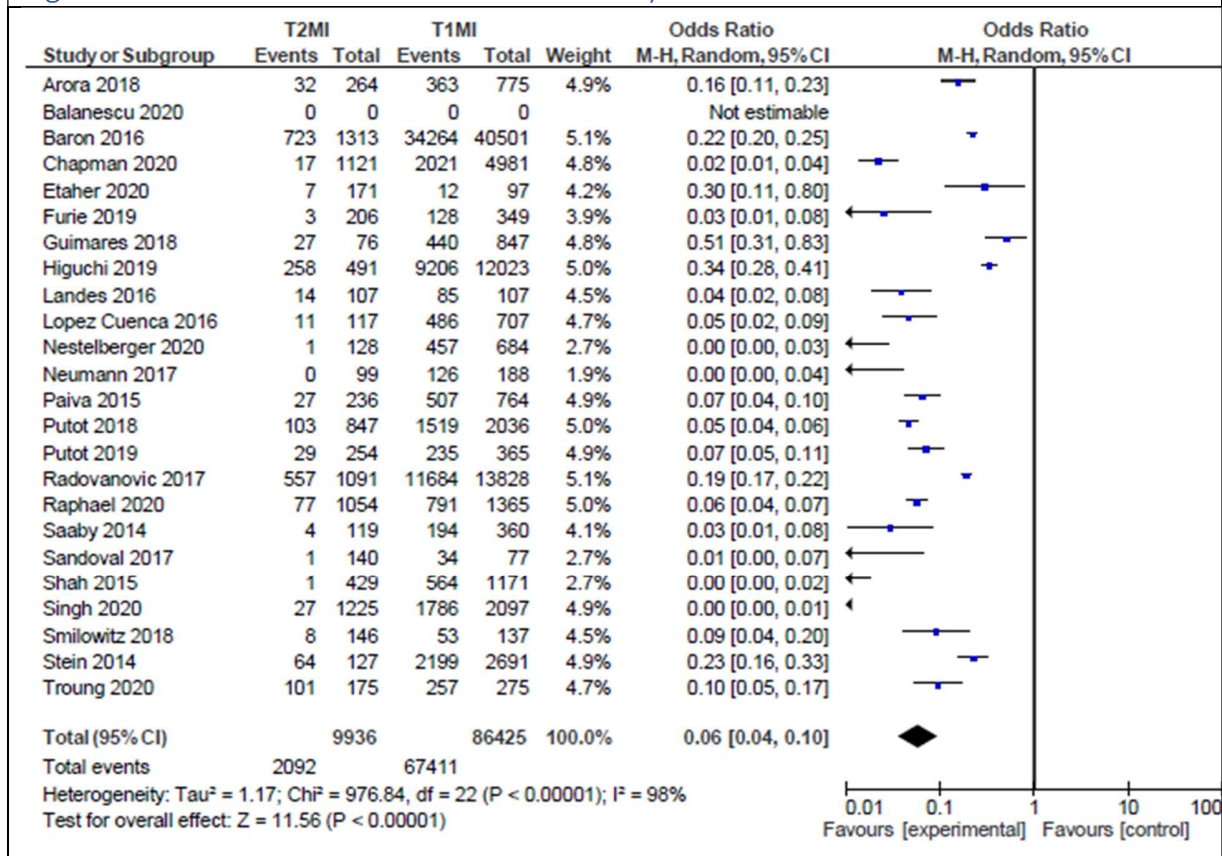

Figure S39. Forest Plot. Coronary Artery Bypass Graft Performed.

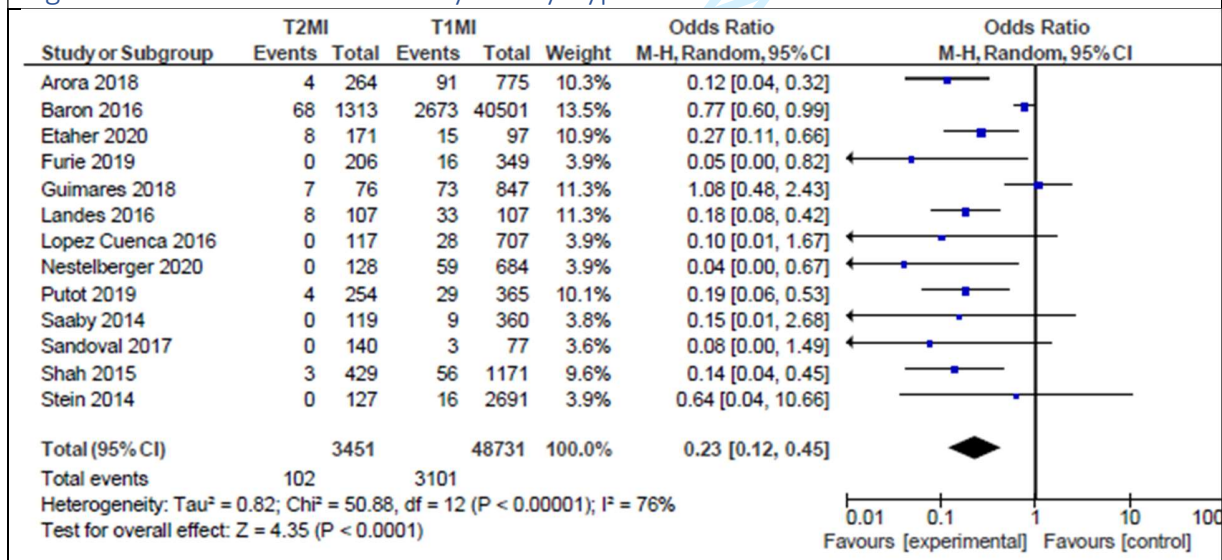

Figure S40. All cause In-hospital mortality. T2MI compared to T1MI.

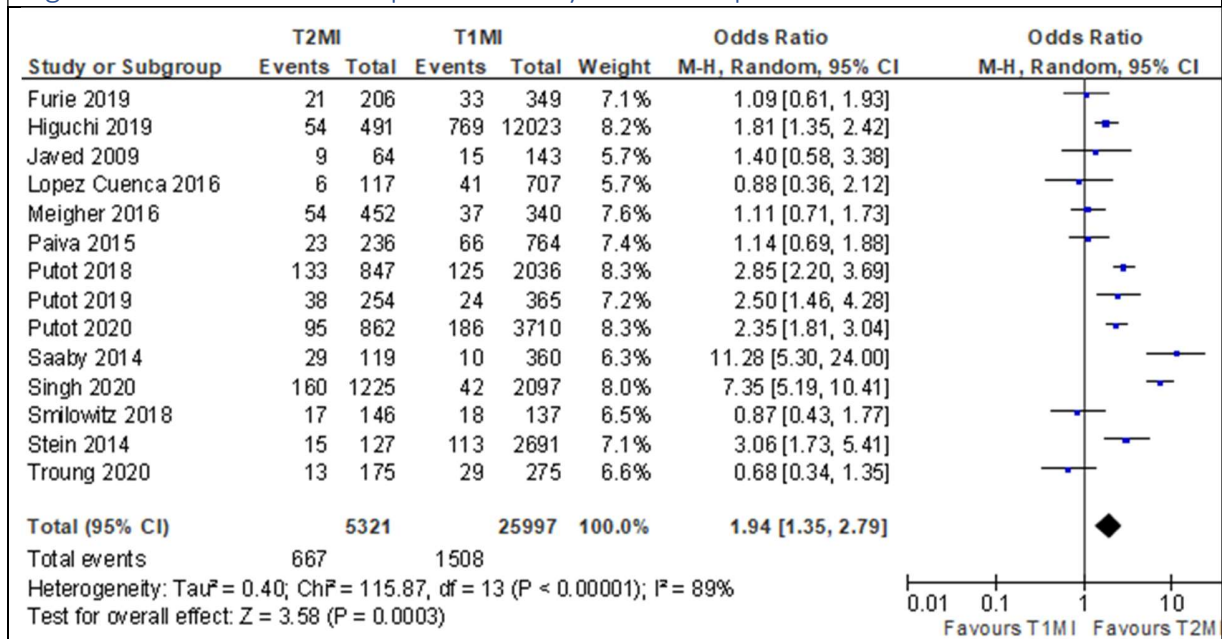

Figure S41. Short-term all-cause mortality. T2MI compared to T1MI.

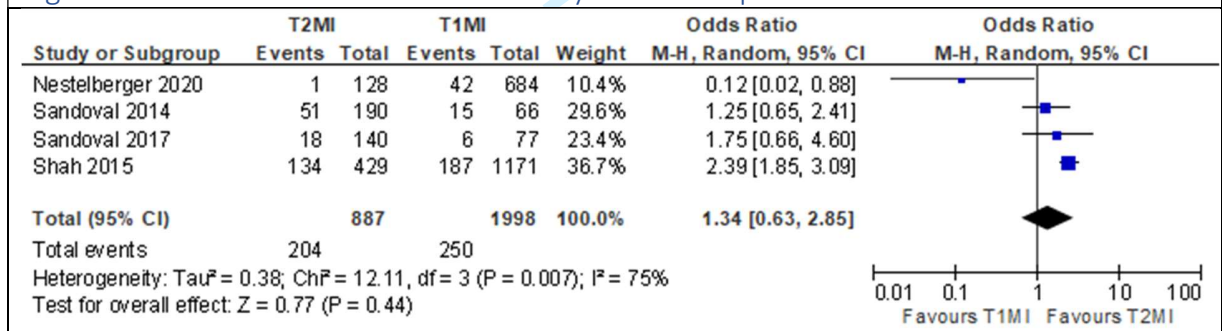

Figure S42. Two-year all-cause mortality. T2MI compared to T1MI.

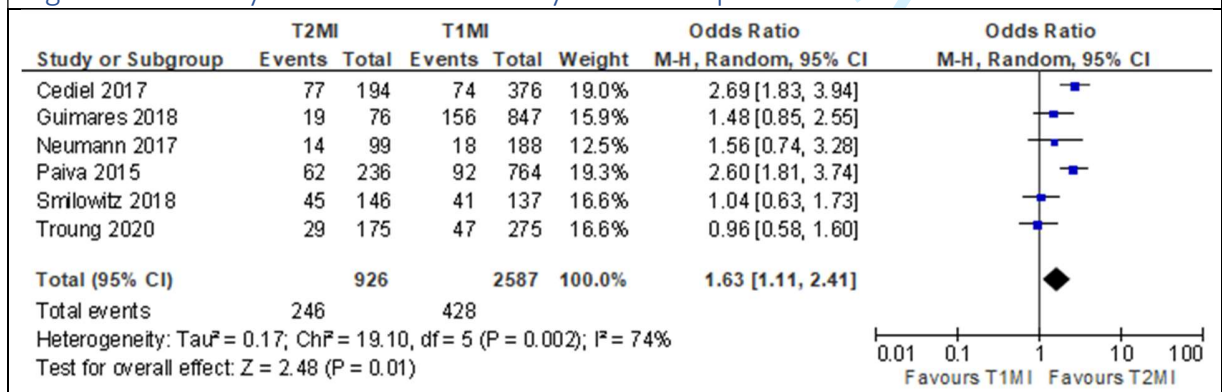

Figure S43. Three-year all-cause mortality. T2MI compared to T1MI.

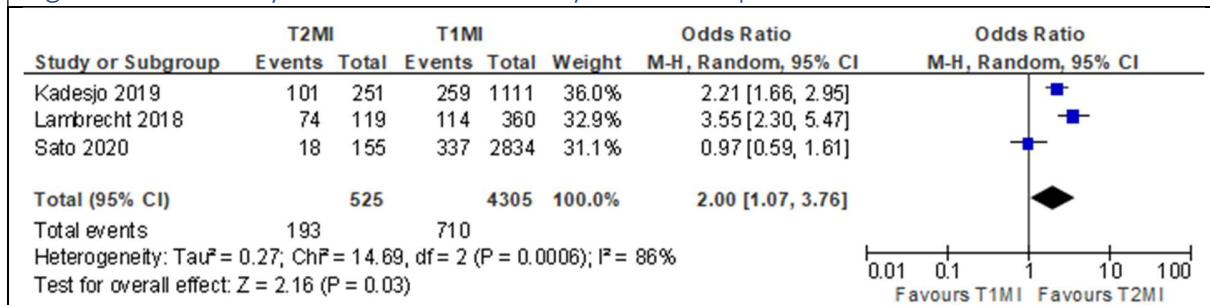

Figure S44. CVS In-hospital mortality. T2MI compared to T1MI.

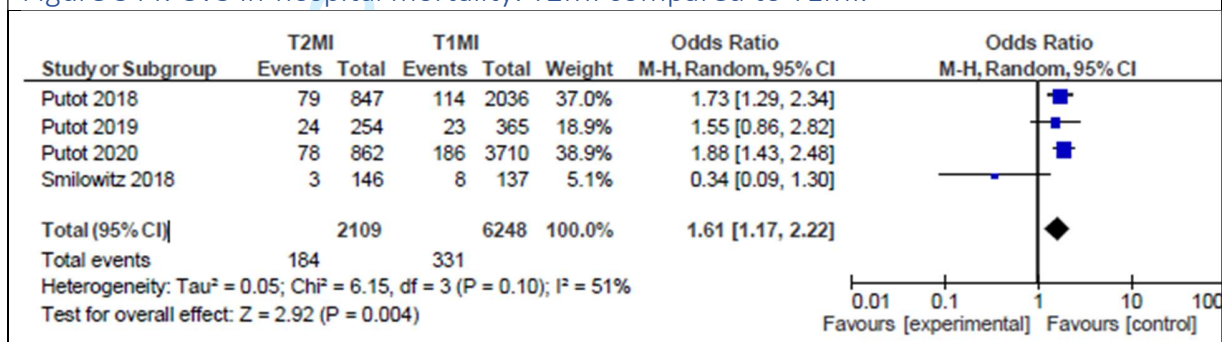

Figure S45. Funnel Plot. All-cause In-hospital mortality. T2MI compared to T1MI.

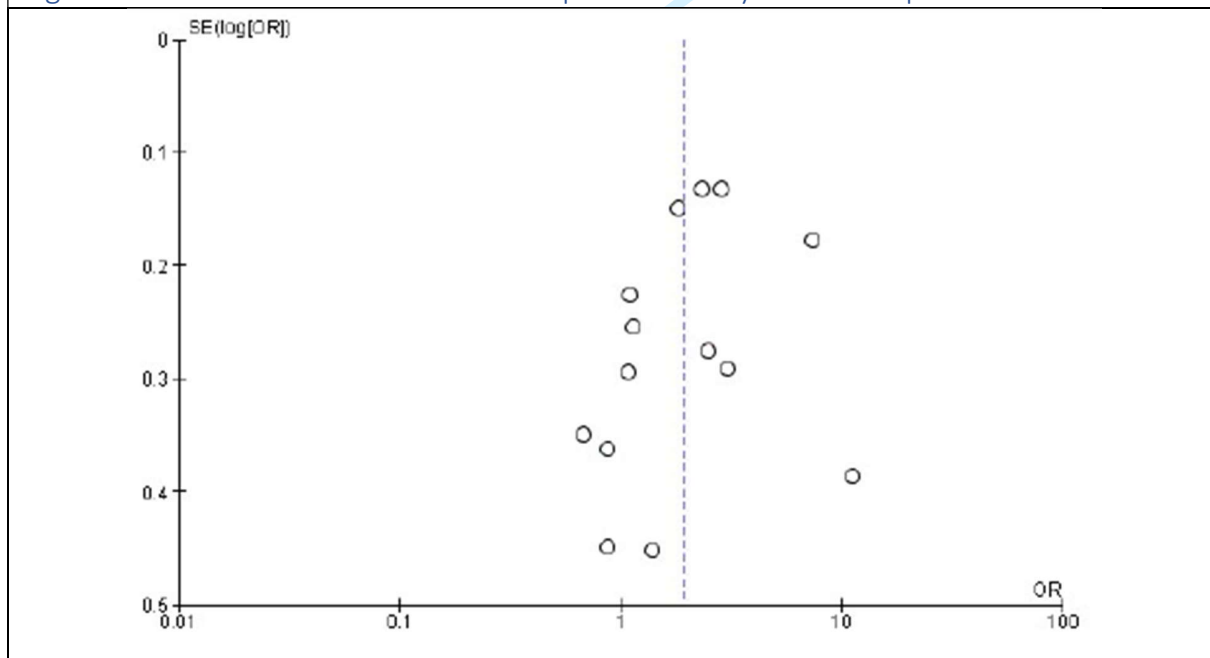

Figure S46. Funnel Plot. One-year All-cause mortality, T2MI compared to T1MI.

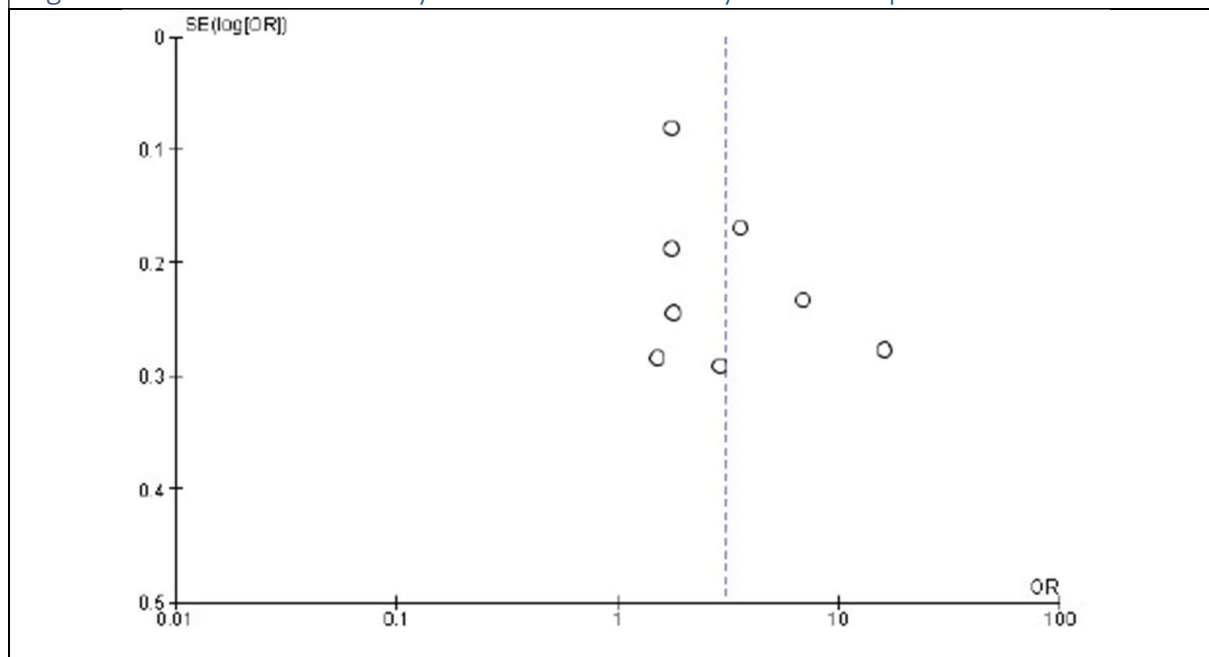

## References

1. Arora S, Strassle PD, Qamar A, Wheeler EN, Levine AL, Misenheimer JA, et al. Impact of Type 2 Myocardial Infarction (MI) on Hospital-Level MI Outcomes: Implications for Quality and Public Reporting. *Journal of the American Heart Association*. 2018;7(7).
2. Balanescu DV, Donisan T, Deswal A, Palaskas N, Song J, Lopez-Mattei J, et al. Acute myocardial infarction in a high-risk cancer population: Outcomes following conservative versus invasive management. *International journal of cardiology*. 2020;313:1-8.
3. Baron T, Hambraeus K, Sundström J, Erlinge D, Jernberg T, Lindahl B. Impact on Long-Term Mortality of Presence of Obstructive Coronary Artery Disease and Classification of Myocardial Infarction. *Am J Med*. 2016;129(4):398-406.
4. Bonaca MP, Wiviott SD, Braunwald E, Murphy SA, Ruff CT, Antman EM, et al. American College of Cardiology/American Heart Association/European Society of Cardiology/World Heart Federation universal definition of myocardial infarction classification system and the risk of cardiovascular death: observations from the TRITON-TIMI 38 trial (Trial to Assess Improvement in Therapeutic Outcomes by Optimizing Platelet Inhibition With Prasugrel-Thrombolysis in Myocardial Infarction 38). *Circulation*. 2012;125(4):577-83.
5. Cediel G, Gonzalez-Del-Hoyo M, Carrasquer A, Sanchez R, Boqué C, Bardají A. Outcomes with type 2 myocardial infarction compared with non-ischaemic myocardial injury. *Heart (British Cardiac Society)*. 2017;103(8):616-22.
6. Chapman AR, Shah ASV, Lee KK, Anand A, Francis O, Adamson P, et al. Long-Term Outcomes in Patients With Type 2 Myocardial Infarction and Myocardial Injury. *Circulation*. 2018;137(12):1236-45.
7. Chapman AR, Adamson PD, Shah ASV, Anand A, Strachan FE, Ferry AV, et al. High-Sensitivity Cardiac Troponin and the Universal Definition of Myocardial Infarction. *Circulation*. 2020;141(3):161-71.
8. Consuegra-Sánchez L, Martínez-Díaz JJ, de Gadiana-Romualdo LG, Wasniewski S, Esteban-Torrella P, Clavel-Ruipérez FG, et al. No additional value of conventional and high-sensitivity cardiac



- troponin over clinical scoring systems in the differential diagnosis of type 1 vs. type 2 myocardial infarction. *Clinical chemistry and laboratory medicine*. 2018;56(5):857-64.
9. El-Haddad H, Robinson E, Swett K, Wells GL. Prognostic implications of type 2 myocardial infarctions. 2012.
  10. Etaher A, Gibbs OJ, Saad YM, Frost S, Nguyen TL, Ferguson I, et al. Type-II myocardial infarction and chronic myocardial injury rates, invasive management, and 4-year mortality among consecutive patients undergoing high-sensitivity troponin T testing in the emergency department. *European heart journal Quality of care & clinical outcomes*. 2020;6(1):41-8.
  11. Furie N, Israel A, Gilad L, Neuman G, Assad F, Ben-Zvi I, et al. Type 2 myocardial infarction in general medical wards: Clinical features, treatment, and prognosis in comparison with type 1 myocardial infarction. *Medicine*. 2019;98(41):e17404.
  12. Guimarães PO, Leonardi S, Huang Z, Wallentin L, de Werf FV, Aylward PE, et al. Clinical features and outcomes of patients with type 2 myocardial infarction: Insights from the Thrombin Receptor Antagonist for Clinical Event Reduction in Acute Coronary Syndrome (TRACER) trial. *Am Heart J*. 2018;196:28-35.
  13. Hawatmeh A, Thawabi M, Aggarwal R, Abirami C, Vavilin I, Wasty N, et al. Implications of Misclassification of Type 2 Myocardial Infarction on Clinical Outcomes. *Cardiovascular revascularization medicine : including molecular interventions*. 2020;21(2):176-9.
  14. Higuchi S, Suzuki M, Horiuchi Y, Tanaka H, Saji M, Yoshino H, et al. Higher non-cardiac mortality and lesser impact of early revascularization in patients with type 2 compared to type 1 acute myocardial infarction: results from the Tokyo CCU Network registry. *Heart Vessels*. 2019;34(7):1140-7.
  15. Javed U, Aftab W, Ambrose JA, Wessel RJ, Mouanoutoua M, Huang G, et al. Frequency of elevated troponin I and diagnosis of acute myocardial infarction. *The American journal of cardiology*. 2009;104(1):9-13.
  16. Kadesjö E, Roos A, Siddiqui A, Desta L, Lundbäck M, Holzmann MJ. Acute versus chronic myocardial injury and long-term outcomes. *Heart (British Cardiac Society)*. 2019;105(24):1905-12.
  17. Lambrecht S, Sarkisian L, Saaby L, Poulsen TS, Gerke O, Hosbond S, et al. Different Causes of Death in Patients with Myocardial Infarction Type 1, Type 2, and Myocardial Injury. *Am J Med*. 2018;131(5):548-54.
  18. Landes U, Bental T, Orvin K, Vaknin-Assa H, Rechavia E, Iakobishvili Z, et al. Type 2 myocardial infarction: A descriptive analysis and comparison with type 1 myocardial infarction. *Journal of cardiology*. 2016;67(1):51-6.
  19. López-Cuenca A, Gómez-Molina M, Flores-Blanco PJ, Sánchez-Martínez M, García-Narbon A, De Las Heras-Gómez I, et al. Comparison between type-2 and type-1 myocardial infarction: clinical features, treatment strategies and outcomes. *J Geriatr Cardiol*. 2016;13(1):15-22.
  20. Meigher S, Thode HC, Peacock WF, Bock JL, Gruberg L, Singer AJ. Causes of Elevated Cardiac Troponins in the Emergency Department and Their Associated Mortality. *Academic emergency medicine : official journal of the Society for Academic Emergency Medicine*. 2016;23(11):1267-73.
  21. Nestelberger T, Boeddinghaus J, Badertscher P, Twerenbold R, Wildi K, Breitenbücher D, et al. Effect of Definition on Incidence and Prognosis of Type 2 Myocardial Infarction. *J Am Coll Cardiol*. 2017;70(13):1558-68.
  22. Neumann JT, Sörensen NA, Rübsamen N, Ojeda F, Renné T, Qaderi V, et al. Discrimination of patients with type 2 myocardial infarction. *Eur Heart J*. 2017;38(47):3514-20.
  23. Paiva L, Providência R, Barra S, Dinis P, Faustino AC, Gonçalves L. Universal definition of myocardial infarction: clinical insights. *Cardiology*. 2015;131(1):13-21.
  24. Pandey AK, Duong T, Swiatkiewicz I, Daniels LB. A Comparison of Biomarker Rise in Type 1 and Type 2 Myocardial Infarction. *The American journal of medicine*. 2020;133(10):1203-8.

- 1
- 2
- 3
- 4
- 5
- 6 25. Putot A, Derrida SB, Zeller M, Avondo A, Ray P, Manckoundia P, et al. Short-Term Prognosis of
- 7 Myocardial Injury, Type 1, and Type 2 Myocardial Infarction in the Emergency Unit. *Am J Med.*
- 8 2018;131(10):1209-19.
- 9 26. Putot A, Jeanmichel M, Chagué F, Avondo A, Ray P, Manckoundia P, et al. Type 1 or type 2
- 10 myocardial infarction in patients with a history of coronary artery disease: Data from the emergency
- 11 department. *Journal of Clinical Medicine.* 2019;8(12).
- 12 27. Putot A, Jeanmichel M, Chague F, Manckoundia P, Cottin Y, Zeller M. Type 2 Myocardial
- 13 Infarction: A Geriatric Population-based Model of Pathogenesis. *Aging and disease.* 2020;11(1):108-17.
- 14 28. Radovanovic D, Pilgrim T, Seifert B, Urban P, Pedrazzini G, Erne P. Type 2 myocardial infarction:
- 15 incidence, presentation, treatment and outcome in routine clinical practice. *Journal of cardiovascular*
- 16 *medicine (Hagerstown, Md).* 2017;18(5):341-7.
- 17 29. Raphael CE, Roger VL, Sandoval Y, Singh M, Bell M, Lerman A, et al. Incidence, Trends, and
- 18 Outcomes of Type 2 Myocardial Infarction in a Community Cohort. *Circulation.* 2020;141(6):454-63.
- 19 30. Reed GW, Horr S, Young L, Clevenger J, Malik U, Ellis SG, et al. Associations Between Cardiac
- 20 Troponin, Mechanism of Myocardial Injury, and Long-Term Mortality After Noncardiac Vascular Surgery.
- 21 *Journal of the American Heart Association.* 2017;6(6).
- 22 31. Saaby L, Poulsen TS, Hosbond S, Larsen TB, Pyndt Diederichsen AC, Hallas J, et al. Classification
- 23 of myocardial infarction: frequency and features of type 2 myocardial infarction. *Am J Med.*
- 24 2013;126(9):789-97.
- 25 32. Saaby L, Poulsen TS, Diederichsen AC, Hosbond S, Larsen TB, Schmidt H, et al. Mortality rate in
- 26 type 2 myocardial infarction: observations from an unselected hospital cohort. *Am J Med.*
- 27 2014;127(4):295-302.
- 28 33. Sandoval Y, Thordsen SE, Smith SW, Schulz KM, Murakami MM, Pearce LA, et al. Cardiac
- 29 troponin changes to distinguish type 1 and type 2 myocardial infarction and 180-day mortality risk.
- 30 *European heart journal Acute cardiovascular care.* 2014;3(4):317-25.
- 31 34. Sandoval Y, Smith SW, Sexter A, Thordsen SE, Bruen CA, Carlson MD, et al. Type 1 and 2
- 32 Myocardial Infarction and Myocardial Injury: Clinical Transition to High-Sensitivity Cardiac Troponin I.
- 33 *Am J Med.* 2017;130(12):1431-9.e4.
- 34 35. Sato R, Sakamoto K, Kaikita K, Tsujita K, Nakao K, Ozaki Y, et al. Long-Term Prognosis of Patients
- 35 with Myocardial Infarction Type 1 and Type 2 with and without Involvement of Coronary Vasospasm.
- 36 *Journal of clinical medicine.* 2020;9(6).
- 37 36. Shah AS, McAllister DA, Mills R, Lee KK, Churchhouse AM, Fleming KM, et al. Sensitive troponin
- 38 assay and the classification of myocardial infarction. *Am J Med.* 2015;128(5):493-501.e3.
- 39 37. Singh A, Gupta A, DeFilippis EM, Qamar A, Biery DW, Almarzooq Z, et al. Cardiovascular
- 40 Mortality After Type 1 and Type 2 Myocardial Infarction in Young Adults. *Journal of the American*
- 41 *College of Cardiology.* 2020;75(9):1003-13.
- 42 38. Smilowitz NR, Subramanyam P, Gianos E, Reynolds HR, Shah B, Sedlis SP. Treatment and
- 43 outcomes of type 2 myocardial infarction and myocardial injury compared with type 1 myocardial
- 44 infarction. *Coronary artery disease.* 2018;29(1):46-52.
- 45 39. Stein GY, Herscovici G, Korenfeld R, Matetzky S, Gottlieb S, Alon D, et al. Type-II myocardial
- 46 infarction--patient characteristics, management and outcomes. *PLoS One.* 2014;9(1):e84285.
- 47 40. Truong HH, Victor MV, Imad MA, Kobalava ZD, Parvathy UT, Al-Zakwani I. Mortality and
- 48 morbidity associated with type 2 myocardial infarction: A single-center study. *Annals of Clinical*
- 49 *Cardiology.* 2020;2(2):70-9.
- 50
- 51
- 52
- 53
- 54
- 55
- 56
- 57
- 58
- 59
- 60

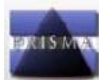

# PRISMA 2020 Checklist

1  
2  
3  
4  
5  
6  
7  
8  
9  
10  
11  
12  
13  
14  
15  
16  
17  
18  
19  
20  
21  
22  
23  
24  
25  
26  
27  
28  
29  
30  
31  
32  
33  
34  
35  
36  
37  
38  
39  
40  
41  
42  
43  
44  
45  
46  
47

| Section and Topic             | Item # | Checklist item                                                                                                                                                                                                                                                                                       | Location where item is reported |
|-------------------------------|--------|------------------------------------------------------------------------------------------------------------------------------------------------------------------------------------------------------------------------------------------------------------------------------------------------------|---------------------------------|
| <b>TITLE</b>                  |        |                                                                                                                                                                                                                                                                                                      |                                 |
| Title                         | 1      | Identify the report as a systematic review.                                                                                                                                                                                                                                                          | 1                               |
| <b>ABSTRACT</b>               |        |                                                                                                                                                                                                                                                                                                      |                                 |
| Abstract                      | 2      | See the PRISMA 2020 for Abstracts checklist.                                                                                                                                                                                                                                                         | 3                               |
| <b>INTRODUCTION</b>           |        |                                                                                                                                                                                                                                                                                                      |                                 |
| Rationale                     | 3      | Describe the rationale for the review in the context of existing knowledge.                                                                                                                                                                                                                          | 4                               |
| Objectives                    | 4      | Provide an explicit statement of the objective(s) or question(s) the review addresses.                                                                                                                                                                                                               | 4                               |
| <b>METHODS</b>                |        |                                                                                                                                                                                                                                                                                                      |                                 |
| Eligibility criteria          | 5      | Specify the inclusion and exclusion criteria for the review and how studies were grouped for the syntheses.                                                                                                                                                                                          | 4                               |
| Information sources           | 6      | Specify all databases, registers, websites, organisations, reference lists and other sources searched or consulted to identify studies. Specify the date when each source was last searched or consulted.                                                                                            | 4                               |
| Search strategy               | 7      | Present the full search strategies for all databases, registers and websites, including any filters and limits used.                                                                                                                                                                                 | Supp                            |
| Selection process             | 8      | Specify the methods used to decide whether a study met the inclusion criteria of the review, including how many reviewers screened each record and each report retrieved, whether they worked independently, and if applicable, details of automation tools used in the process.                     | 4                               |
| Data collection process       | 9      | Specify the methods used to collect data from reports, including how many reviewers collected data from each report, whether they worked independently, any processes for obtaining or confirming data from study investigators, and if applicable, details of automation tools used in the process. | 4                               |
| Data items                    | 10a    | List and define all outcomes for which data were sought. Specify whether all results that were compatible with each outcome domain in each study were sought (e.g. for all measures, time points, analyses), and if not, the methods used to decide which results to collect.                        | 4                               |
|                               | 10b    | List and define all other variables for which data were sought (e.g. participant and intervention characteristics, funding sources). Describe any assumptions made about any missing or unclear information.                                                                                         | 4                               |
| Study risk of bias assessment | 11     | Specify the methods used to assess risk of bias in the included studies, including details of the tool(s) used, how many reviewers assessed each study and whether they worked independently, and if applicable, details of automation tools used in the process.                                    | 5                               |
| Effect measures               | 12     | Specify for each outcome the effect measure(s) (e.g. risk ratio, mean difference) used in the synthesis or presentation of results.                                                                                                                                                                  | 5                               |
| Synthesis methods             | 13a    | Describe the processes used to decide which studies were eligible for each synthesis (e.g. tabulating the study intervention characteristics and comparing against the planned groups for each synthesis (item #5)).                                                                                 | 5                               |
|                               | 13b    | Describe any methods required to prepare the data for presentation or synthesis, such as handling of missing summary statistics, or data conversions.                                                                                                                                                | 5                               |
|                               | 13c    | Describe any methods used to tabulate or visually display results of individual studies and syntheses.                                                                                                                                                                                               | 5                               |
|                               | 13d    | Describe any methods used to synthesize results and provide a rationale for the choice(s). If meta-analysis was performed, describe the model(s), method(s) to identify the presence and extent of statistical heterogeneity, and software package(s) used.                                          | 5                               |
|                               | 13e    | Describe any methods used to explore possible causes of heterogeneity among study results (e.g. subgroup analysis, meta-regression).                                                                                                                                                                 | 5                               |
|                               | 13f    | Describe any sensitivity analyses conducted to assess robustness of the synthesized results.                                                                                                                                                                                                         | N/A                             |
| Reporting bias assessment     | 14     | Describe any methods used to assess risk of bias due to missing results in a synthesis (arising from reporting biases).                                                                                                                                                                              | 5                               |
| Certainty                     | 15     | Describe any methods used to assess certainty (or confidence) in the body of evidence for an outcome.                                                                                                                                                                                                | N/A                             |



## PRISMA 2020 Checklist

| Section and Topic                              | Item # | Checklist item                                                                                                                                                                                                                                                                       | Location where item is reported |
|------------------------------------------------|--------|--------------------------------------------------------------------------------------------------------------------------------------------------------------------------------------------------------------------------------------------------------------------------------------|---------------------------------|
| assessment                                     |        |                                                                                                                                                                                                                                                                                      |                                 |
| <b>RESULTS</b>                                 |        |                                                                                                                                                                                                                                                                                      |                                 |
| Study selection                                | 16a    | Describe the results of the search and selection process, from the number of records identified in the search to the number of studies included in the review, ideally using a flow diagram.                                                                                         | 5                               |
|                                                | 16b    | Cite studies that might appear to meet the inclusion criteria, but which were excluded, and explain why they were excluded.                                                                                                                                                          | 5                               |
| Study characteristics                          | 17     | Cite each included study and present its characteristics.                                                                                                                                                                                                                            | Supp                            |
| Risk of bias in studies                        | 18     | Present assessments of risk of bias for each included study.                                                                                                                                                                                                                         | Supp                            |
| Results of individual studies                  | 19     | For all outcomes, present, for each study: (a) summary statistics for each group (where appropriate) and (b) an effect estimate and its precision (e.g. confidence/credible interval), ideally using structured tables or plots.                                                     | Supp                            |
| Results of syntheses                           | 20a    | For each synthesis, briefly summarise the characteristics and risk of bias among contributing studies.                                                                                                                                                                               | Supp                            |
|                                                | 20b    | Present results of all statistical syntheses conducted. If meta-analysis was done, present for each the summary estimate and its precision (e.g. confidence/credible interval) and measures of statistical heterogeneity. If comparing groups, describe the direction of the effect. | Supp                            |
|                                                | 20c    | Present results of all investigations of possible causes of heterogeneity among study results.                                                                                                                                                                                       | Supp                            |
|                                                | 20d    | Present results of all sensitivity analyses conducted to assess the robustness of the synthesized results.                                                                                                                                                                           | N/A                             |
| Reporting biases                               | 21     | Present assessments of risk of bias due to missing results (arising from reporting biases) for each synthesis assessed.                                                                                                                                                              | N/A                             |
| Certainty of evidence                          | 22     | Present assessments of certainty (or confidence) in the body of evidence for each outcome assessed.                                                                                                                                                                                  | N/A                             |
| <b>DISCUSSION</b>                              |        |                                                                                                                                                                                                                                                                                      |                                 |
| Discussion                                     | 23a    | Provide a general interpretation of the results in the context of other evidence.                                                                                                                                                                                                    | 7                               |
|                                                | 23b    | Discuss any limitations of the evidence included in the review.                                                                                                                                                                                                                      | 9                               |
|                                                | 23c    | Discuss any limitations of the review processes used.                                                                                                                                                                                                                                | 9                               |
|                                                | 23d    | Discuss implications of the results for practice, policy, and future research.                                                                                                                                                                                                       | 9                               |
| <b>OTHER INFORMATION</b>                       |        |                                                                                                                                                                                                                                                                                      |                                 |
| Registration and protocol                      | 24a    | Provide registration information for the review, including register name and registration number, or state that the review was not registered.                                                                                                                                       | 4                               |
|                                                | 24b    | Indicate where the review protocol can be accessed, or state that a protocol was not prepared.                                                                                                                                                                                       | 4                               |
|                                                | 24c    | Describe and explain any amendments to information provided at registration or in the protocol.                                                                                                                                                                                      | N/A                             |
| Support                                        | 25     | Describe sources of financial or non-financial support for the review, and the role of the funders or sponsors in the review.                                                                                                                                                        | N/A                             |
| Competing interests                            | 26     | Declare any competing interests of review authors.                                                                                                                                                                                                                                   | N/A                             |
| Availability of data, code and other materials | 27     | Report which of the following are publicly available and where they can be found: template data collection forms; data extracted from included studies; data used for all analyses; analytic code; any other materials used in the review.                                           | N/A                             |



# PRISMA 2020 Checklist

- 1
- 2
- 3
- 4
- 5
- 6
- 7
- 8
- 9
- 10
- 11
- 12
- 13
- 14
- 15
- 16
- 17
- 18
- 19
- 20
- 21
- 22
- 23
- 24
- 25
- 26
- 27
- 28
- 29
- 30
- 31
- 32
- 33
- 34
- 35
- 36
- 37
- 38
- 39
- 40
- 41
- 42
- 43
- 44
- 45
- 46
- 47

10.1136/bmj.n71

For more information, visit: <http://www.prisma-statement.org/>

For peer review only
